# Supplementary material for: Computationally designed high specificity inhibitors delineate the roles of BCL2 family proteins in cancer
Source: eLife journal article supplement (doi:10.7554/elife.20352), 2016-11-02

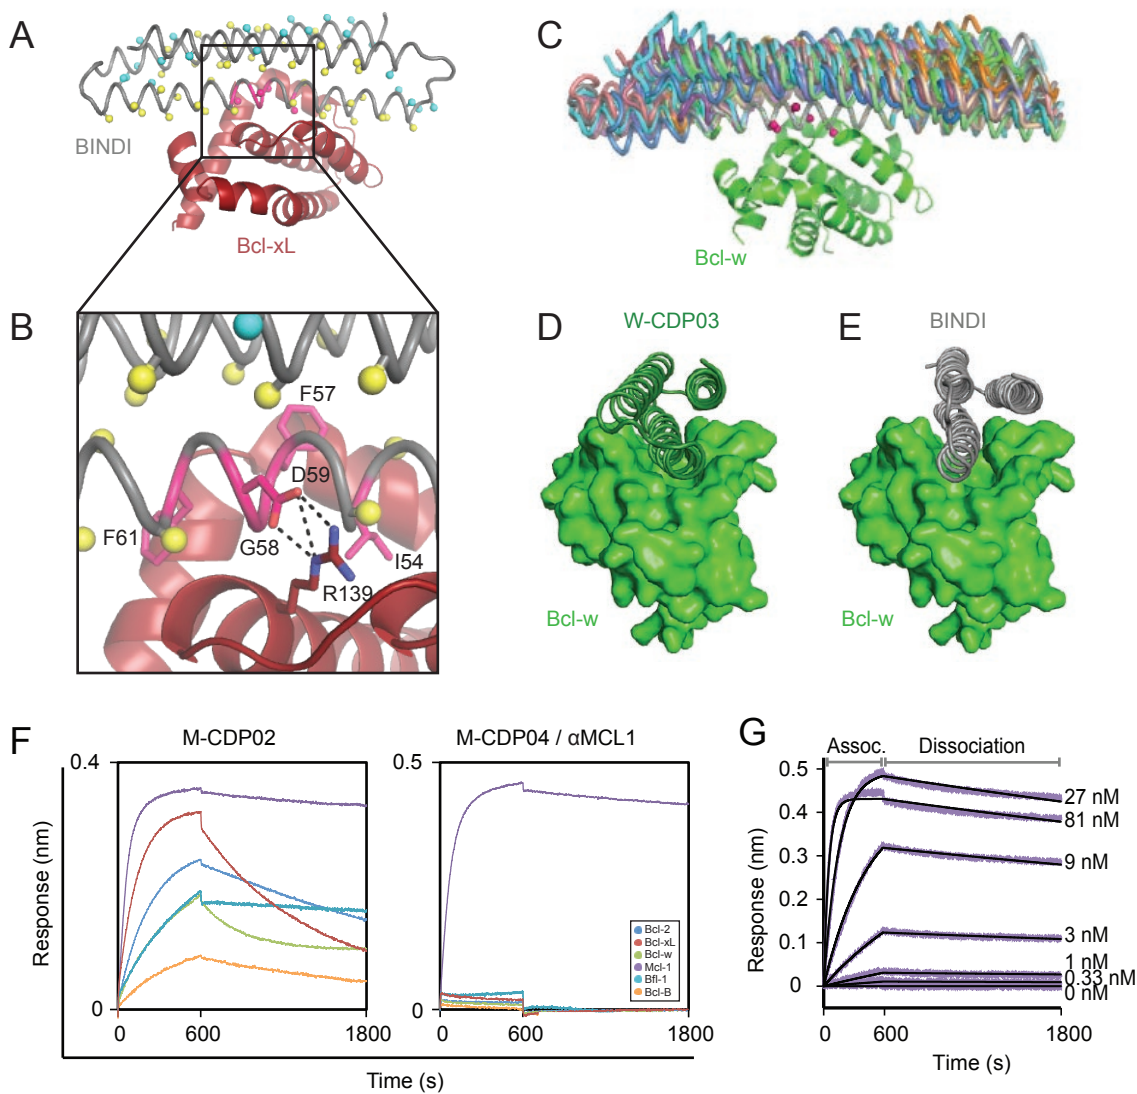

**H**

|                | Bcl-2            | Bcl-xL             | Bcl-w              | Mcl-1           | Bfl-1           | Bcl-B                 | Specificity |
|----------------|------------------|--------------------|--------------------|-----------------|-----------------|-----------------------|-------------|
| 2-CDP06        | 9 $\pm$ 1        | 12,000 $\pm$ 1,000 | 1,700 $\pm$ 100    | > 50,000        | > 50,000        | > 50,000              | 190         |
| X-CDP07        | 4 $\pm$ 1        | 0.59 $\pm$ 0.07    | 14.9 $\pm$ 0.5     | 17 $\pm$ 1      | > 50,000        | 107 $\pm$ 9           | 7           |
| W-CDP03        | 30 $\pm$ 20      | 7 $\pm$ 1          | 8 $\pm$ 1          | 57 $\pm$ 8      | 500 $\pm$ 300   | 410 $\pm$ 80          | < 1         |
| F-CDP01        | 27 $\pm$ 8       | 11 $\pm$ 1         | 600 $\pm$ 80       | 4.6 $\pm$ 0.6   | 2 $\pm$ 2       | 100,000 $\pm$ 100,000 | 2           |
| F-ECM04        | 100 $\pm$ 6      | 540 $\pm$ 30       | 3,800 $\pm$ 500    | 300 $\pm$ 100   | 1.1 $\pm$ 0.7   | 4,000 $\pm$ 4,000     | 91          |
| 10-CDP01       | 17 $\pm$ 3       | 20 $\pm$ 4         | 2,000 $\pm$ 500    | 0.46 $\pm$ 0.09 | 520 $\pm$ 30    | 8 $\pm$ 1             | < 1         |
| 10-ECM01       | 12,500 $\pm$ 400 | 7,800 $\pm$ 300    | 19,000 $\pm$ 2,000 | 3,700 $\pm$ 100 | 2,400 $\pm$ 900 | 80 $\pm$ 50           | 30          |
| BIM BH3        | 0.17             | 0.75               | 1.56               | 0.61            | 7               | 20                    | N/A         |
| ABT-199 (1)    | < 0.01           | 48                 | 245                | > 444           | N/A             | N/A                   | 4,800       |
| A-13311852 (2) | 6                | 0.01               | 4                  | 142             | N/A             | N/A                   | 400         |
| A-1210477 (3)  | 132              | 660                | 2280               | 0.415           | 660             | N/A                   | 320         |
| ABT-263 (2)    | 0.044            | 0.055              | 7                  | > 224           | 354             | N/A                   | N/A         |
| ABT-737 (4)    | < 1              | < 0.5              | 0.9                | > 1000          | N/A             | N/A                   | N/A         |
| MB1 (5)        | 1000             | 1000               | 1000               | 4               | 1000            | N/A                   | 250         |
| MS1 (6)        | 2300             | 1600               | 1300               | 1.9             | 5000            | N/A                   | 690         |
| FA1 (7)        | N/A              | 33                 | N/A                | 6               | 0.3             | N/A                   | 20          |
| XH11 (5)       | 73               | 2.9                | 81                 | 1000            | 1000            | N/A                   | 25          |

$\log(K_D)$

0.01 nM

500,000 nM

**I**

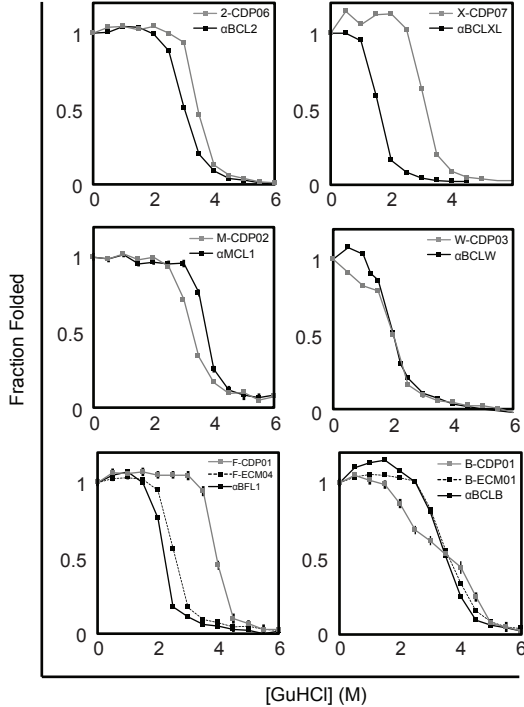

Supplement: supp [file elife_poa_e20352_Figure_2_figure_supplement_1.pdf › elife_poa_e20352_Figure_2_figure_supplement_1.pdf]
