# Supplementary material for: Computationally designed high specificity inhibitors delineate the roles of BCL2 family proteins in cancer
Source: eLife. 2016 Nov 2;5:e20352. doi: 10.7554/eLife.20352 (PMC5127641; doi:10.7554/eLife.20352)
Supplement: Figure 2—source data 1. — Biolayer interferometry data fit to a 1:1 binding model using ForteBio analysis software. Three separate binding titrations (n = 3) were completed for each binding pair, except when negligible signal was detected at high analyte concentrations (indicated in file where applicable). Figure 2—source data 1. Source data relating to Figure 2—figure supplement 1I. CD data collected for chemical denaturation experiments in guanidinium hydrochloride from 0 to 6 M. DOI: http://dx.doi.org/10.7554/eLife.20352.005 [file elife-20352-fig2-data1.xlsx]

## Sheet: Readme
	The following data are represented in Figure 2A-M, and Figure 2-supplement 1H.
	Three separate experiments were performed per protein-protein interaction.
	Values represented in iso-affinity plots (on- and off-rates) are highlighted in gray:
	average
	standard deviation
	Values represented in KD tables (dissociation constant) are highlighted in yellow:
	average
	standard deviation

## Sheet: 2-CDP06
	KD (M)	KD Error	kon(1/Ms)	kon Error	variance	kdis(1/s)	kdis Error	variance
Bcl-2, titration 1	1.034e-08	1.508e-09	221900	13720	188238400	0.002294	0.0003031	9.18696e-08
Bcl-2, titration 2	8.733e-09	4.538e-11	221100	1122	1258884	0.00193	2.132e-06	4.54542e-12
Bcl-2, titration 3	7.727e-09	3.348e-11	214100	896.1	802995	0.001654	1.852e-06	3.4299e-12
	8.93333e-09	1.31797e-09	219033	4291.08	7964.51	0.00195933	0.000321007	0.000175002
Bcl-xL, titration 1	1.191e-05	2.01e-06	55910	9062	82119844	0.6662	0.0311	0.00096721
Bcl-xL, titration 2	1.096e-05	2.1e-06	52430	9664	93392896	0.5745	0.03021	0.000912644
Bcl-xL, titration 3	1.349e-05	2.686e-06	48960	9394	88247236	0.6606	0.03511	0.00123271
	1.212e-05	1.27801e-06	52433.3	3475	9376.57	0.633767	0.0514028	0.0322106
Bcl-w, titration 1	1.792e-06	4.142e-08	41320	914.2	835762	0.07403	0.0004948	2.44827e-07
Bcl-w, titration 2	1.535e-06	3.921e-08	49570	1215	1476225	0.07608	0.0005501	3.0261e-07
Bcl-w, titration 3	1.679e-06	3.754e-08	47490	1017	1034289	0.07974	0.0005097	2.59794e-07
	1.66867e-06	1.28811e-07	46126.7	4290.64	1056.14	0.0766167	0.00289258	0.000518726
Mcl-1, titration 1	6.748e-05	0.0001128	14830	24630	606636900	1.001	0.1903	0.0362141
Mcl-1, titration 2	1.024e-05	3.062e-06	59870	17340	300675600	0.6132	0.04566	0.00208484
Mcl-1, titration 3	*negligible signal for remaining titration at max concentraiton 25 uM
	3.886e-05	4.04748e-05	37350	31848.1	21299.2	0.8071	0.274216	0.138382
Bfl-1, titration 1	*negligible signal at 25 uM
Bfl-1, titration 2
Bfl-1, titration 3
Bcl-B, titration 1	1.473e-05	3.713e-06	5678	1358	1844164	0.08362	0.00667	4.44889e-05
Bcl-B, titration 2	*negligible signal for remaining titrations at max concentraiton 25 uM
Bcl-B, titration 3
values used in iso-affinity plots (on- and off-rates):
average
standard deviation
values used in KD tables (dissociation constant):
average
standard deviation

## Sheet: X-CDP07
	KD (M)	KD Error	kon(1/Ms)	kon Error	variance	kdis(1/s)	kdis Error	variance
Bcl-2, titration 1	4.97e-09	6.086e-11	83370	283.9	80599.2	0.0004144	4.874e-06	2.37559e-11
Bcl-2, titration 2	3.001e-09	1.415e-11	124100	408.3	166709	0.0003724	1.259e-06	1.58508e-12
Bcl-2, titration 3	3.457e-09	1.435e-11	115000	342.4	117238	0.0003975	1.15e-06	1.3225e-12
	3.80933e-09	1.0307e-09	107490	21378.3	348.59	0.000394767	2.1133e-05	2.98124e-06
Bcl-xL, titration 1	6.427e-10	2.858e-12	237400	871.5	759512	0.0001526	3.831e-07	1.46766e-13
Bcl-xL, titration 2	5.142e-10	2.331e-12	242700	848.2	719443	0.0001248	3.603e-07	1.29816e-13
Bcl-xL, titration 3	6.13e-10	3.609e-12	246100	1189	1413721	0.0001509	5.079e-07	2.57962e-13
	5.89967e-10	6.72753e-11	242067	4384.44	981.95	0.000142767	1.55828e-05	4.22115e-07
Bcl-w, titration 1	1.521e-08	7.326e-11	70180	209.9	44058	0.001067	4.031e-06	1.6249e-11
Bcl-w, titration 2	1.512e-08	5.641e-11	68110	156.3	24429.7	0.00103	3.03e-06	9.1809e-12
Bcl-w, titration 3	1.435e-08	5.176e-11	68470	135.7	18414.5	0.0009826	2.961e-06	8.76752e-12
	1.48933e-08	4.72687e-10	68920	1105.94	170.198	0.00102653	4.23067e-05	3.37626e-06
Mcl-1, titration 1	1.887e-08	2.889e-10	161600	1072	1149184	0.003049	4.208e-05	1.77073e-09
Mcl-1, titration 2	1.699e-08	1.645e-10	158900	899	808201	0.0027	2.122e-05	4.50288e-10
Mcl-1, titration 3	1.639e-08	1.653e-10	157200	902.2	813965	0.002576	2.137e-05	4.56677e-10
	1.74167e-08	1.29388e-09	159233	2218.86	961.136	0.002775	0.000245257	2.98758e-05
Bfl-1, titration 1	7.047e-06	5.643e-07	24180	1846	3407716	0.1704	0.004107	1.68674e-05
Bfl-1, titration 2	*negligible signal for remaining titrations at max concentraiton 25 uM
Bfl-1, titration 3
Bcl-B, titration 1	1.004e-07	2.529e-09	21960	351.3	123412	0.002206	4.288e-05	1.83869e-09
Bcl-B, titration 2	1.166e-07	3.374e-09	21410	441.1	194569	0.002496	5.071e-05	2.5715e-09
Bcl-B, titration 3	1.035e-07	1.671e-09	19290	271	73441	0.001996	1.587e-05	2.51857e-10
	1.06833e-07	8.59903e-09	20886.7	1409.83	361.212	0.00223267	0.000251064	3.9421e-05
values used in iso-affinity plots (on- and off-rates):
average
standard deviation
values used in KD tables (dissociation constant):
average
standard deviation

## Sheet: W-CDP03
	KD (M)	KD Error	kon(1/Ms)	kon Error	variance	kdis(1/s)	kdis Error	variance
Bcl-2, titration 1	5.265e-08	2.653e-10	8398	30.05	903.003	0.0004422	1.569e-06	2.46176e-12
Bcl-2, titration 2	1.401e-08	9.868e-11	30690	124.3	15450.5	0.00043	2.478e-06	6.14048e-12
Bcl-2, titration 3	1.41e-08	1.457e-10	29180	270.9	73386.8	0.0004113	1.864e-06	3.4745e-12
	2.692e-08	2.22829e-08	22756	12457.3	172.955	0.000427833	1.55635e-05	2.00638e-06
Bcl-xL, titration 1	6.317e-09	3.535e-11	54520	191	36481	0.0003444	1.503e-06	2.25901e-12
Bcl-xL, titration 2	7.73e-09	5.613e-11	66140	446.2	199094	0.0005112	1.373e-06	1.88513e-12
Bcl-xL, titration 3	8.254e-09	1.143e-10	50530	654.6	428501	0.0004171	2.045e-06	4.18202e-12
	7.43367e-09	1.00192e-09	57063.3	8109.84	470.488	0.000424233	8.36285e-05	1.66595e-06
Bcl-w, titration 1	8.12e-09	1.05e-10	11500	29.3	858.49	9.3e-05	1.18e-06	1.3924e-12
Bcl-w, titration 2	9.373e-09	7.215e-11	10240	25.47	648.721	9.595e-05	6.988e-07	4.88321e-13
Bcl-w, titration 3	6.842e-09	4.737e-11	12970	36.82	1355.71	8.871e-05	5.601e-07	3.13712e-13
	8.11167e-09	1.26552e-09	11570	1366.35	30.8919	9.25533e-05	3.64061e-06	8.55265e-07
Mcl-1, titration 1	6.22e-08	7.839e-10	48090	596.1	355335	0.002991	6.806e-06	4.63216e-11
Mcl-1, titration 2	5.103e-08	7.773e-10	76960	1147	1315609	0.003927	1.248e-05	1.5575e-10
Mcl-1, titration 3	*negligible signal for remaining titrations at max concentraiton 25 uM
	5.6615e-08	7.89838e-09	62525	20414.2	914.042	0.003459	0.000661852	1.00517e-05
Bfl-1, titration 1	2.46e-07	1.28e-08	120200	6063	36759969	0.02956	0.0003766	1.41828e-07
Bfl-1, titration 2	7.123e-07	3.234e-08	61690	2479	6145441	0.04394	0.0009277	8.60627e-07
Bfl-1, titration 3	*negligible signal for remaining titrations at max concentraiton 25 uM
	4.7915e-07	3.29724e-07	90945	41372.8	4631.71	0.03675	0.0101682	0.000707974
Bcl-B, titration 1	4.663e-07	6.977e-09	11910	174.1	30310.8	0.005551	1.768e-05	3.12582e-10
Bcl-B, titration 2	3.209e-07	6.686e-09	18800	373.9	139801	0.006033	3.742e-05	1.40026e-09
Bcl-B, titration 3	4.323e-07	1.044e-08	21140	491.8	241867	0.00914	5.917e-05	3.50109e-09
	4.065e-07	7.6056e-08	17283.3	4798.27	370.576	0.006908	0.00194793	4.1689e-05
values used in iso-affinity plots (on- and off-rates):
average
standard deviation
values used in KD tables (dissociation constant):
average
standard deviation

## Sheet: F-CDP01
	KD (M)	KD Error	kon(1/Ms)	kon Error	kdis(1/s)	kdis Error
Bcl-2, titration 1	3.148e-08	3.507e-10	46030	503.5	0.001449	3.054e-06
Bcl-2, titration 2	1.79e-08	1.957e-10	79020	843.3	0.001415	3.344e-06
Bcl-2, titration 3	3.164e-08	1.343e-09	72640	3022	0.002298	1.942e-05
	2.70067e-08	7.88701e-09	65896.7	17498.3	0.00172067	0.000500274
Bcl-xL, titration 1	1.04e-08	4.443e-11	92430	383.4	0.0009617	9.737e-07
Bcl-xL, titration 2	1.33e-08	7.133e-11	88880	462.9	0.001182	1.515e-06
Bcl-xL, titration 3	1.119e-08	1.049e-10	89390	814.3	0.001001	2.211e-06
	1.163e-08	1.49923e-09	90233.3	1919.38	0.00104823	0.0001175
Bcl-w, titration 1	5.995e-07	8.169e-09	11390	150.3	0.006831	2.326e-05
Bcl-w, titration 2	6.773e-07	6.598e-09	11060	104.2	0.00749	1.854e-05
Bcl-w, titration 3	5.245e-07	7.197e-09	13920	185.4	0.007303	2.417e-05
	6.00433e-07	7.64043e-08	12123.3	1564.68	0.007208	0.000339616
Mcl-1, titration 1	3.914e-09	3.418e-11	144600	909.1	0.0005658	3.427e-06
Mcl-1, titration 2	5.183e-09	1.699e-11	116100	271.6	0.0006017	1.382e-06
Mcl-1, titration 3	4.752e-09	1.456e-11	133300	305.9	0.0006333	1.285e-06
	4.61633e-09	6.45286e-10	131333	14351.4	0.000600267	3.37728e-05
Bfl-1, titration 1	3.339e-09	1.491e-11	46530	188.2	0.0001554	2.945e-07
Bfl-1, titration 2	3.195e-09	1.513e-11	55680	244.1	0.0001779	3.186e-07
Bfl-1, titration 3	2.599e-10	3.24e-12	92630	593	2.407e-05	2.576e-07
	2.26463e-09	1.73764e-09	64946.7	24407.1	0.000119123	8.30838e-05
Bcl-B, titration 1	0.0002318	0.0003202	1429	1971	0.3312	0.02462
Bcl-B, titration 2	8.504e-05	6.723e-05	4998	3921	0.425	0.04134
Bcl-B, titration 3	2.891e-05	8.15e-06	7666	2089	0.2216	0.016
	0.00011525	0.000104764	4697.67	3129.33	0.325933	0.101802
values used in iso-affinity plots (on- and off-rates):
average
standard deviation
values used in KD tables (dissociation constant):
average
standard deviation

## Sheet: F-ECM04
	KD (M)	KD Error	kon(1/Ms)	kon Error	variance	kdis(1/s)	kdis Error	variance
Bcl-2, titration 1	9.499e-08	5.239e-10	105800	470.7	221558	0.01005	3.277e-05	1.07387e-09
Bcl-2, titration 2	1.065e-07	7.196e-10	96390	525.7	276360	0.01026	4.096e-05	1.67772e-09
Bcl-2, titration 3	9.915e-08	4.228e-10	106300	367.5	135056	0.01054	2.632e-05	6.92742e-10
	1.00213e-07	5.82821e-09	102830	5582.8	459.338	0.0102833	0.000245832	3.38838e-05
Bcl-xL, titration 1	5.03e-07	1.903e-08	190300	6838	46758244	0.09572	0.001132	1.28142e-06
Bcl-xL, titration 2	5.573e-07	2.185e-08	190600	7120	50694400	0.1062	0.001262	1.59264e-06
Bcl-xL, titration 3	5.515e-07	2.187e-08	201000	7592	57638464	0.1108	0.001334	1.77956e-06
	5.37267e-07	2.98172e-08	193967	6092.89	7190.07	0.10424	0.0077287	0.00124548
Bcl-w, titration 1	3.986e-06	1.284e-07	21520	655.6	429811	0.08578	0.0008956	8.02099e-07
Bcl-w, titration 2	4.139e-06	1.517e-07	20900	724.8	525335	0.0865	0.001026	1.05268e-06
Bcl-w, titration 3	3.185e-06	9.572e-08	27760	803.2	645130	0.08842	0.0007205	5.1912e-07
	3.77e-06	5.12368e-07	23393.3	3794.33	730.36	0.0869	0.0013647	0.00088955
Mcl-1, titration 1	9.573e-08	3.437e-09	642200	22240	494617600	0.06147	0.000581	3.37561e-07
Mcl-1, titration 2	3.24e-07	8.144e-09	189700	4468	19963024	0.06146	0.0005394	2.90952e-07
Mcl-1, titration 3	3.45e-07	1.156e-08	212400	6762	45724644	0.07329	0.0007647	5.84766e-07
	2.5491e-07	1.38253e-07	348100	254951	13666.3	0.0654067	0.00682717	0.000635945
Bfl-1, titration 1	1.006e-09	4.048e-10	98720	2318	5373124	9.93e-05	3.99e-05	1.59201e-09
Bfl-1, titration 2	4.928e-10	4.348e-10	112200	2813	7912969	5.528e-05	4.876e-05	2.37754e-09
Bfl-1, titration 3	1.925e-09	1.207e-11	147500	662.2	438509	0.000284	1.244e-06	1.54754e-12
	1.14127e-09	7.25618e-10	119473	25190.2	2138.89	0.000146193	0.000121357	3.63827e-05
Bcl-B, titration 1	1.899e-06	2.739e-07	21080	2754	7584516	0.04004	0.00245	6.0025e-06
Bcl-B, titration 2	1.341e-06	1.813e-07	21540	2533	6416089	0.02889	0.001923	3.69793e-06
Bcl-B, titration 3	8.249e-06	2.469e-06	26960	7771	60388441	0.2223	0.01792	0.000321126
	3.82967e-06	3.83741e-06	23193.3	3270.13	4979.59	0.0970767	0.10859	0.0105012
values used in iso-affinity plots (on- and off-rates):
average
standard deviation
values used in KD tables (dissociation constant):
average
standard deviation

## Sheet: B-CDP01
	KD (M)	KD Error	kon(1/Ms)	kon Error	kdis(1/s)	kdis Error
Bcl-2, titration 1	1.531e-08	9.818e-11	24860	153.9	0.0003806	6.381e-07
Bcl-2, titration 2	1.531e-08	9.818e-11	24860	153.9	0.0003806	6.381e-07
Bcl-2, titration 3	2.13e-08	1.57e-10	23200	167	0.000494	7.762e-07
	1.73067e-08	3.45833e-09	24306.7	958.401	0.0004184	6.54715e-05
			958.401		6.54715e-05
Bcl-xL, titration 1	1.577e-08	1.136e-10	39370	276.8	0.0006208	9.824e-07
Bcl-xL, titration 2	2.41e-08	1.712e-10	33330	230.6	0.0008034	1.289e-06
Bcl-xL, titration 3	2.072e-08	9.983e-11	37500	175.7	0.000777	8.699e-07
	2.01967e-08	4.18959e-09	36733.3	3092.12	0.000733733	9.86899e-05
			3092.12		9.86899e-05
Bcl-w, titration 1	1.957e-06	5.808e-08	8925	247.5	0.01746	0.0001851
Bcl-w, titration 2	1.54e-06	5.878e-08	12480	449.8	0.01921	0.0002413
Bcl-w, titration 3	2.545e-06	7.733e-08	7707	220.8	0.01961	0.0001988
	2.014e-06	5.04919e-07	9704	2480.02	0.01876	0.00114346
			2480.02		0.00114346
Mcl-1, titration 1	5.478e-10	1.187e-12	75540	126.9	4.138e-05	1e-07	*kdis Error was below detection limit, <10^-7
Mcl-1, titration 2	3.736e-10	1.134e-12	82690	169.9	3.089e-05	1e-07	*kdis Error was below detection limit, <10^-7
Mcl-1, titration 3	4.546e-10	1.96e-12	49170	121.5	2.235e-05	1e-07	*kdis Error was below detection limit, <10^-7
	4.58667e-10	8.71712e-11	69133.3	17654.5	3.154e-05	9.53164e-06
			17654.5		9.53164e-06
Bfl-1, titration 1	5.178e-07	1.604e-08	11580	324.2	0.005994	7.948e-05
Bfl-1, titration 2	4.89e-07	2.264e-08	15780	683.3	0.007717	0.0001266
Bfl-1, titration 3	5.467e-07	1.939e-08	13800	454	0.007546	0.0001002
	5.17833e-07	2.885e-08	13720	2101.14	0.00708567	0.000949269
			2101.14		0.000949269
Bcl-B, titration 1	9.166e-09	9.167e-11	18520	166.8	0.0001697	7.375e-07
Bcl-B, titration 2	7.01e-09	6.838e-11	22280	210.1	0.0001562	3.902e-07
Bcl-B, titration 3	8.828e-09	8.224e-11	42980	390.7	0.0003794	7.715e-07
	8.33467e-09	1.15958e-09	27926.7	13171.4	0.0002351	0.00012515
values used in iso-affinity plots (on- and off-rates):			13171.4		0.00012515
average
standard deviation
values used in KD tables (dissociation constant):
average
standard deviation

## Sheet: B-ECM01
	KD (M)	KD Error	kon(1/Ms)	kon Error	variance	kdis(1/s)	kdis Error	variance
Bcl-2, titration 1	1.283e-05	7.693e-07	6151	360.6	130032	0.07893	0.0009924	9.84858e-07
Bcl-2, titration 2	1.206e-05	4.723e-07	6182	230.4	53084.2	0.07456	0.0008943	7.99772e-07
Bcl-2, titration 3	1.249e-05	6.858e-07	6325	331.6	109959	0.07899	0.00129	1.6641e-06
	1.246e-05	3.85876e-07	6219.33	92.8134	312.557	0.0774933	0.00254052	0.00107218
Bcl-xL, titration 1	7.539e-06	2.499e-07	11550	361.2	130465	0.08708	0.0009586	9.18914e-07
Bcl-xL, titration 2	7.659e-06	3.147e-07	12810	499.3	249300	0.09814	0.001279	1.63584e-06
Bcl-xL, titration 3	8.133e-06	3.746e-07	12090	528.5	279312	0.09832	0.001426	2.03348e-06
	7.777e-06	3.14089e-07	12150	632.139	468.714	0.0945133	0.00643808	0.00123669
Bcl-w, titration 1	1.66e-05	8.546e-07	3970	199.5	39800.2	0.0659	0.0007336	5.38169e-07
Bcl-w, titration 2	2.001e-05	9.709e-07	3555	169.4	28696.4	0.07113	0.0006537	4.27324e-07
Bcl-w, titration 3	2.028e-05	1.49e-06	3590	259.3	67236.5	0.07279	0.0009973	9.94607e-07
	1.89633e-05	2.05115e-06	3705	230.163	212.707	0.06994	0.00359584	0.000808311
Mcl-1, titration 1	3.526e-06	6.213e-08	11560	186.1	34633.2	0.04078	0.0002928	8.57318e-08
Mcl-1, titration 2	3.655e-06	5.67e-08	11560	165.7	27456.5	0.04226	0.0002516	6.33026e-08
Mcl-1, titration 3	3.77e-06	6.855e-08	11880	200.5	40200.2	0.04478	0.000303	9.1809e-08
	3.65033e-06	1.22067e-07	11666.7	184.752	184.653	0.0426067	0.00202241	0.000283339
Bfl-1, titration 1	1.394e-06	2.779e-08	8542	150.3	22590.1	0.01191	0.0001116	1.24546e-08
Bfl-1, titration 2	2.844e-06	9.187e-08	8191	218.2	47611.2	0.0233	0.0004258	1.81306e-07
Bfl-1, titration 3	2.9e-06	1.084e-07	8250	256.3	65689.7	0.02392	0.0004973	2.47307e-07
	2.37933e-06	8.53783e-07	8327.67	187.948	212.831	0.01971	0.00676211	0.000383435
Bcl-B, titration 1	1.942e-08	1.969e-09	61790	2154	4639716	0.0012	0.0001143	1.30645e-08
Bcl-B, titration 2	9.475e-08	6.64e-09	15400	488.4	238535	0.00146	9.121e-05	8.31926e-09
Bcl-B, titration 3	1.164e-07	1.024e-08	17410	845.4	714701	0.002028	0.0001488	2.21414e-08
	7.68567e-08	5.09059e-08	31533.3	26222.3	1365.4	0.00156267	0.00042344	0.000120451
values used in iso-affinity plots (on- and off-rates):
average
standard deviation
values used in KD tables (dissociation constant):
average
standard deviation

## Sheet: aBCL2
	KD (M)	KD Error	kon(1/Ms)	kon Error	variance	kdis(1/s)	kdis Error	variance
Bcl-2, titration 1	1.458e-09	5.386e-12	187900	674.2	454546	0.0002741	2.398e-07	5.7504e-14
Bcl-2, titration 2	3.802e-10	3.364e-12	483700	3073	9443329	0.0001839	1.132e-06	1.28142e-12
Bcl-2, titration 3	6.783e-10	5.669e-12	485000	3576	12787776	0.000329	1.294e-06	1.67444e-12
	8.38833e-10	5.56544e-10	385533	171157	2749.89	0.000262333	7.32622e-05	1.00222e-06
Bcl-xL, titration 1	3.323e-06	1.919e-07	119800	6596	43507216	0.3981	0.006945	4.8233e-05
Bcl-xL, titration 2	3.481e-06	1.844e-07	116000	5847	34187409	0.4037	0.006542	4.27978e-05
Bcl-xL, titration 3	3.814e-06	2.257e-07	105000	5889	34680321	0.4006	0.007555	5.7078e-05
	3.53933e-06	2.50644e-07	113600	7686.35	6120.32	0.4008	0.00280535	0.00702635
Bcl-w, titration 1	1.507e-06	8.741e-08	88620	5026	25260676	0.1335	0.001627	2.64713e-06
Bcl-w, titration 2	1.893e-06	1.097e-07	79080	4502	20268004	0.1497	0.001629	2.65364e-06
Bcl-w, titration 3	2.139e-06	4.057e-08	70510	1271	1615441	0.1508	0.000891	7.93881e-07
	1.84633e-06	3.18574e-07	79403.3	9059.33	3964.18	0.144667	0.00968624	0.00142532
Mcl-1, titration 1	*negligible signal at 75 uM
Mcl-1, titration 2
Mcl-1, titration 3
Bfl-1, titration 1	*negligible signal at 75 uM
Bfl-1, titration 2
Bfl-1, titration 3
Bcl-B, titration 1	*negligible signal at 75 uM
Bcl-B, titration 2
Bcl-B, titration 3
values used in iso-affinity plots (on- and off-rates):
average
standard deviation
values used in KD tables (dissociation constant):
average
standard deviation

## Sheet: aBCLXL
	KD (M)	KD Error	kon(1/Ms)	kon Error	variance	kdis(1/s)	kdis Error	variance
Bcl-2, titration 1	5.153e-06	1.435e-07	31210	827.1	684094	0.1608	0.001375	1.89062e-06
Bcl-2, titration 2	2.754e-06	9.042e-08	49790	1557	2424249	0.1371	0.001374	1.88788e-06
Bcl-2, titration 3	3.113e-06	1.104e-07	45080	1522	2316484	0.1403	0.001522	2.31648e-06
	3.67333e-06	1.29394e-06	42026.7	9659	1344.72	0.146067	0.0128594	0.00142536
Bcl-xL, titration 1	5.99e-09	1.953e-11	106900	315.9	99792.8	0.0006402	8.798e-07	7.74048e-13
Bcl-xL, titration 2	5.484e-09	2.65e-11	96200	438.5	192282	0.0005275	8.474e-07	7.18087e-13
Bcl-xL, titration 3	5.29e-09	3.015e-11	97730	530.3	281218	0.000517	9.017e-07	8.13063e-13
	5.588e-09	3.61403e-10	100277	5786.76	437.147	0.000561567	6.83005e-05	8.76584e-07
Bcl-w, titration 1	5.463e-05	9.609e-06	6202	1069	1142761	0.3388	0.01182	0.000139712
Bcl-w, titration 2	3.005e-05	2.621e-06	9179	773.4	598148	0.2759	0.006218	3.86635e-05
Bcl-w, titration 3	3.588e-05	2.173e-06	8159	478.9	229345	0.2928	0.004362	1.9027e-05
	4.01867e-05	1.28435e-05	7846.67	1512.88	810.402	0.3025	0.0325526	0.00811178
Mcl-1, titration 1	7.303e-05	1.82e-05	9142	2245	5040025	0.6676	0.02841	0.000807128	*Poor signal at 75 uM
Mcl-1, titration 2	0.001455	0.01017	389	2719	7392961	0.5659	0.04776	0.00228102
Mcl-1, titration 3	0.001691	0.01444	355.5	3035	9211225	0.601	0.05438	0.00295718
	0.00107301	0.00087401	3295.5	5063.25	2686.03	0.6115	0.0516567	0.04489
Bfl-1, titration 1	2.19e-05	1.64e-05	6780	4820	23232400	0.149	0.0353	0.00124609	*Poor signal at 75 uM
Bfl-1, titration 2	0.0002906	0.0004564	1064	1666	2775556	0.3092	0.03659	0.00133883
Bfl-1, titration 3	0.00018	0.0002141	4606	5460	29811600	0.8288	0.08577	0.00735649
	0.000164167	0.000135048	4150	2885.15	4313.53	0.429	0.355382	0.0575656
Bcl-B, titration 1	0.0003435	0.0004123	2348	2815	7924225	0.8064	0.04625	0.00213906	*Poor signal at 75 uM
Bcl-B, titration 2	0.0008217	0.001575	847.5	1624	2637376	0.6964	0.0264	0.00069696
Bcl-B, titration 3	0.0008957	0.001929	757.6	1631	2660161	0.6786	0.0273	0.00074529
	0.000686967	0.000299743	1317.7	893.397	2099.35	0.727133	0.0692215	0.034551
values used in iso-affinity plots (on- and off-rates):
average
standard deviation
values used in KD tables (dissociation constant):
average
standard deviation

[truncated: 4 more sheets: aBCLW, M-CDP04 (aMCL1), aBFL1, aBCLB]
