# Supplementary material for: Computationally designed high specificity inhibitors delineate the roles of BCL2 family proteins in cancer
Source: eLife. 2016 Nov 2;5:e20352. doi: 10.7554/eLife.20352 (PMC5127641; doi:10.7554/eLife.20352)
Supplement: Figure 2—source data 2. — CD data collected for chemical denaturation experiments in guanidinium hydrochloride from 0 to 6 M. DOI: http://dx.doi.org/10.7554/eLife.20352.006 [file elife-20352-fig2-data2.xlsx]

## Sheet: Readme
	The following data are represented in Figure 2-supplement 1I.
	Temperature melts and full wavelength scans over a range of temperatures were not reported in the manuscript but are included here when performed.

## Sheet: 2-CDP06
Notes:
For the GuHCl melt, three scans were performed per sample.
Temperature scans were performed once per construct.
Guanidinium melt						Temperature melt
[GuHCl]	mdeg (222 nm)	% folded	Average %	StdDev %		Temperature	mdeg (222 nm)
0	-21.3871	100.453	100	0.395491		24.99	-21.2442
0	-21.2317	99.723				27.09	-21.158
0	-21.2532	99.824				29.1	-21.0719
0.5	-21.9032	102.877	103.799	1.1285		31.07	-21.0149
0.5	-22.0281	103.464				33.02	-20.5653
0.5	-22.3675	105.058				35.08	-20.6764
1	-22.4091	105.253	104.171	1.11909		37.07	-20.298
1	-21.9333	103.018				39.08	-20.1885
1	-22.1939	104.242				41.03	-20.2024
1.5	-21.6007	101.456	102.146	0.887883		43.07	-20.1544
1.5	-21.681	101.833				45.08	-19.8953
1.5	-21.9608	103.148				47.04	-19.8355
2	-22.2519	104.515	104.44	0.393175		49.08	-19.5692
2	-22.3104	104.79				51.02	-19.6608
2	-22.1453	104.014				53.09	-19.3076
2.5	-21.39	100.467	99.6457	0.89609		55.11	-19.1415
2.5	-21.0117	98.6897				57.09	-19.3889
2.5	-21.244	99.7808				59.1	-19.1298
3	-20.0617	94.2277	93.4475	1.37329		61.05	-19.2095
3	-20.0671	94.253				63.1	-18.3823
3	-19.558	91.8618				65.07	-18.9102
3.5	-9.81311	46.0911	45.7853	0.373847		67.06	-18.3195
3.5	-9.65926	45.3685				69.09	-18.0992
3.5	-9.77159	45.8961				71.08	-18.1748
4	-2.61678	12.2907	12.7453	0.687687		73.07	-17.7066
4	-2.6419	12.4087				75.13	-17.6878
4	-2.882	13.5364				77.09	-17.2954
4.5	-1.09272	5.13239	5.74549	0.663296		79.09	-16.9152
4.5	-1.20388	5.6545				81.12	-16.7572
4.5	-1.37316	6.44959				83.09	-16.4476
5	-0.698331	3.27999	3.56887	0.595256		85.07	-15.5619
5	-0.675592	3.17318				87.05	-15.3339
5	-0.905586	4.25344				89.09	-13.953
5.5	-0.180122	0.846014	1.32192	0.481624		91.09	-12.7318
5.5	-0.385162	1.80907				93.03	-11.6331
5.5	-0.27905	1.31067				95.07	-10.7462
6	-0.323595	1.51989	0.727444	1.00547
6	0.0859338	-0.403622
6	-0.226972	1.06606

## Sheet: X-CDP07
Notes:
For the GuHCl melt, three scans were performed per sample.
Guanidinium melt
[GuHCl]	mdeg (222 nm)	% folded	Average %	StdDev %
0	-19.3117	99.077	100	0.850333
0	-19.525	100.171
0	-19.6381	100.752
0.5	-22.3673	114.754	114.324	0.415814
0.5	-22.2055	113.923
0.5	-22.2779	114.295
1	-20.541	105.384	105.458	0.425621
1	-20.4808	105.075
1	-20.6448	105.916
1.5	-21.3867	109.723	112.078	2.32494
1.5	-21.8577	112.139
1.5	-22.2928	114.371
2	-21.8637	112.17	112.623	0.471752
2	-21.9449	112.586
2	-22.0472	113.111
2.5	-20.1611	103.435	102.408	0.94807
2.5	-19.925	102.224
2.5	-19.7968	101.566
3	-12.0167	61.6507	63.0429	1.20811
3	-12.4089	63.6628
3	-12.4386	63.8152
3.5	-3.8598	19.8024	19.5729	0.719417
3.5	-3.65794	18.7668
3.5	-3.92748	20.1496
4	-1.67001	8.56784	8.35745	0.593105
4	-1.71851	8.81667
4	-1.49848	7.68782
4.5	-0.882261	4.52637	4.68288	0.162886
4.5	-0.945628	4.85146
4.5	-0.910414	4.6708
5	-0.725964	3.7245	3.4385	0.666121
5	-0.762874	3.91386
5	-0.521817	2.67714
5.5	-0.669152	3.43303	2.31506	1.07317
5.5	-0.432519	2.219
5.5	-0.252054	1.29314
6	-0.594582	3.05045	2.23255	0.744317
6	-0.40002	2.05227
6	-0.310879	1.59494

## Sheet: W-CDP03
Notes:
For the GuHCl melt, three scans were performed per sample.
Temperature scans were performed once per construct.
Guanidinium melt						Temperature melt			Wavelength scans at temps
[GuHCl]	mdeg (222 nm)	% folded	Average %	StdDev %		Temperature	mdeg (222 nm)			mdeg (222 nm)								25C (after melt)
0	-17.2642	100.98	100	0.989209		19.94	-17.5216		Wavelength	20°C	30°C	40°C	50°C	60°C	70°C	80°C	90°C	Wavelength	mdeg (222 nm)
0	-17.0998	100.018				22.02	-17.0691		260	-0.0329645	0.000703243	0.117904	0.174589	0.182733	0.222171	-0.066766	0.00264293	260	0.263997
0	-16.926	99.0018				24.06	-17.5337		259.9	-0.0292709	0.0186526	0.084851	0.189761	0.168687	0.203418	-0.0475825	0.0269725	259	0.311922
0.5	-15.6008	91.2505	90.5775	0.748555		26.06	-16.909		259.8	-0.0249186	0.0476286	0.0620771	0.149118	0.172562	0.220569	-0.0665262	0.023632	258	0.121944
0.5	-15.3479	89.7713				28.05	-17.1197		259.7	-0.0253912	0.0681925	0.0578785	0.171953	0.170709	0.209922	-0.0491513	0.0579412	257	0.0202467
0.5	-15.5085	90.7107				30.07	-16.5622		259.6	-0.0712431	0.0592979	0.0634639	0.204832	0.191593	0.239523	-0.041017	0.045808	256	0.109309
1	-14.1991	83.0519	82.1796	0.904997		32.06	-16.6335		259.5	-0.120088	0.079125	0.0580951	0.189555	0.231244	0.2447	-0.046286	0.0175111	255	0.0423293
1	-14.0606	82.2418				34.04	-16.1816		259.4	-0.107267	0.0584552	0.06041	0.193898	0.24301	0.234563	-0.0123453	0.0537619	254	0.0361835
1	-13.8902	81.2451				36.05	-16.3487		259.3	-0.145623	0.0275751	0.0726048	0.214082	0.216553	0.218604	0.0374761	0.0155356	253	0.1196
1.5	-13.4796	78.8434	78.4514	0.614924		38.06	-16.302		259.2	-0.116236	0.0522996	0.0676222	0.195098	0.189112	0.208349	0.0430074	0.0233021	252	0.21168
1.5	-13.4667	78.768				40.06	-16.1844		259.1	-0.115678	-0.0016409	0.0356353	0.191932	0.166411	0.206424	0.0346355	0.049044	251	-0.0699243
1.5	-13.2914	77.7426				42.06	-15.6047		259	-0.107186	-0.0344648	0.0339742	0.219146	0.138438	0.202065	-0.0197748	0.0379191	250	-0.19257
2	-8.39901	49.1266	49.5787	0.693039		44.05	-16.0131		258.9	-0.104616	-0.0177709	0.0562514	0.287771	0.169799	0.193653	-0.0166991	0.0466083	249	-0.0281754
2	-8.61272	50.3766				46.06	-15.8163		258.8	-0.0694263	-0.0495067	0.0456644	0.283177	0.134564	0.20637	-0.0173467	0.0226397	248	0.0784958
2	-8.41719	49.2329				48.09	-15.4987		258.7	-0.0441613	-0.0293415	0.0264475	0.267767	0.135653	0.211208	-0.0586372	0.0281991	247	0.170755
2.5	-2.59796	15.1957	15.704	0.610857		50.08	-15.7565		258.6	-0.0473768	-0.0140269	0.027724	0.23401	0.123907	0.167918	-0.0539036	0.037082	246	0.122831
2.5	-2.80072	16.3817				52.12	-15.1503		258.5	-0.0737391	-0.0271135	0.0188419	0.219962	0.127682	0.153997	-0.0610469	0.0240916	245	-0.345239
2.5	-2.6559	15.5346				54.06	-15.0629		258.4	-0.0398085	-0.0902589	0.0637713	0.179973	0.146044	0.137056	-0.0883409	0.0241913	244	-0.463456
3	-1.64459	9.61936	9.05471	1.40892		56.1	-14.6155		258.3	0.0150782	-0.0774119	0.0435706	0.133111	0.146066	0.138111	-0.122016	0.00223339	243	-0.33652
3	-1.27388	7.45104				58.07	-14.2542		258.2	0.0187128	-0.074623	0.0348005	0.143737	0.127732	0.153382	-0.116974	0.0292565	242	-0.530489
3	-1.72569	10.0937				60.06	-14.0165		258.1	0.0171762	-0.0593996	-0.00511871	0.172942	0.15913	0.133056	-0.0815406	0.0252578	241	-1.05002
3.5	-0.795538	4.65318	5.24893	0.914308		62.07	-13.8543		258	-0.0021343	-0.000290202	-0.025662	0.192364	0.179122	0.154035	-0.0792214	0.000336634	240	-1.3133
3.5	-0.819269	4.79198				64.08	-13.1377		257.9	0.00418543	0.0145641	0.0661195	0.214611	0.15836	0.147781	-0.0922008	-0.0233637	239	-1.99111
3.5	-1.07737	6.30164				66.09	-12.6641		257.8	0.000597896	-0.032109	0.0784171	0.165565	0.127184	0.128323	-0.139856	-0.0204292	238	-2.48144
4	-0.914082	5.34655	4.333	1.03438		68.06	-12.1643		257.7	0.0302885	-0.0219652	0.0598673	0.214715	0.0949965	0.126012	-0.12987	-0.00532212	237	-3.27294
4	-0.560596	3.27898				70.08	-11.7242		257.6	0.0423451	0.0144618	0.0501313	0.193235	0.0803421	0.125451	-0.150197	-0.0292705	236	-3.83624
4	-0.747717	4.37347				72.07	-10.7243		257.5	0.0133579	-0.0069398	0.0699084	0.208292	0.0805488	0.115538	-0.180091	-0.0359584	235	-4.85403
4.5	-0.116177	0.67953	1.94628	1.15253		74.02	-10.2567		257.4	-0.0295702	-0.00259589	0.079882	0.222143	0.124821	0.0861053	-0.167848	-0.0542639	234	-5.67372
4.5	-0.380633	2.22636				76.05	-9.69103		257.3	0.000885341	-0.00898953	0.102274	0.208378	0.130865	0.0552624	-0.139254	-0.05306	233	-6.77233
4.5	-0.501438	2.93296				78.05	-8.71961		257.2	0.0206565	-0.0094899	0.0853127	0.172181	0.0974063	0.0314491	-0.155324	-0.0756296	232	-7.88798
5	-0.197569	1.1556	1.83782	0.662344		80.04	-8.5183		257.1	0.0448968	0.0122755	0.0743277	0.138528	0.109581	0.0276198	-0.240966	-0.0462487	231	-8.9189
5	-0.321341	1.87955				82.07	-7.66569		257	0.0659634	-0.0367534	0.0929482	0.118514	0.121827	0.037216	-0.196373	-0.0128466	230	-9.75555
5	-0.423709	2.47831				84.06	-7.16502		256.9	0.0481501	-0.046183	0.1063	0.143158	0.11188	0.0642302	-0.175295	0.00162206	229	-11.335
5.5	0.0238688	-0.139611	0.224799	0.315738		86.11	-6.46332		256.8	0.0577223	-0.0294904	0.0996364	0.142022	0.112433	0.0826506	-0.211974	0.0171058	228	-12.7382
5.5	-0.0712508	0.416753				88.07	-6.07855		256.7	0.0648734	-0.0703289	0.0865532	0.130308	0.0850903	0.0875363	-0.219436	-0.000454199	227	-13.5587
5.5	-0.0679172	0.397254				90.04	-5.44398		256.6	0.0220193	-0.0707134	0.12419	0.165457	0.140254	0.0525444	-0.222334	-0.0112997	226	-14.4019
6	0.515694	-3.01634	-2.48558	1.64288		92.08	-4.95798		256.5	0.00579023	-0.0579309	0.150263	0.130941	0.158741	0.0744915	-0.191277	-0.0115217	225	-15.0039
6	0.109921	-0.642938				94.12	-4.59273		256.4	0.0154601	-0.0564664	0.111811	0.148094	0.132667	0.0838427	-0.178726	-0.0265941	224	-15.6733
6	0.64924	-3.79747				96.1	-4.49976		256.3	0.00645269	-0.0421338	0.0947796	0.191211	0.158394	0.0931543	-0.202736	-0.0585758	223	-15.9579
									256.2	0.00416537	-0.0422961	0.111667	0.110567	0.202141	0.0981213	-0.217287	-0.107819	222	-15.9709
									256.1	0.0464038	-0.0269154	0.0878747	0.0427902	0.204338	0.111841	-0.202064	-0.129203	221	-15.7038
									256	0.0401776	-0.0102173	0.0876386	0.0223638	0.199953	0.129549	-0.187061	-0.161901	220	-15.3148
									255.9	0.0140221	-0.0497582	0.0982369	0.0207278	0.192324	0.179943	-0.190892	-0.247211	219	-15.5589
									255.8	0.0113438	-0.0493093	0.0953536	0.0177021	0.169872	0.127206	-0.130666	-0.275352	218	-15.425
									255.7	0.00887438	-0.0598087	0.10898	0.0172023	0.227685	0.105916	-0.0983451	-0.28692	217	-15.4095
									255.6	-0.0222181	-0.0867079	0.115506	0.00177943	0.226183	0.0734819	-0.122063	-0.262694	216	-15.0238
									255.5	-0.00538236	-0.0630319	0.0893402	0.030605	0.206071	0.0519665	-0.177304	-0.262412	215	-14.8618
									255.4	-0.0211347	-0.0601731	0.0798267	0.0465045	0.210185	0.0798206	-0.162227	-0.267321	214	-14.7308
									255.3	-0.0278463	-0.0655122	0.0436068	0.0166421	0.187438	0.0484194	-0.148043	-0.272786	213	-15.0815
									255.2	-0.0687665	-0.016569	0.0161073	0.0230375	0.221066	0.0135348	-0.121907	-0.325815	212	-15.3098
									255.1	-0.0547437	0.00164843	0.00784571	0.0305949	0.21189	0.0463273	-0.144168	-0.332441	211	-15.6942
									255	-0.0656398	0.000215916	0.00257448	-0.0138986	0.204168	0.0387466	-0.131849	-0.287492	210	-15.9956
									254.9	-0.0128071	-0.0180981	0.0140838	-0.0230274	0.203635	0.0227171	-0.127204	-0.249599	209	-16.0956
									254.8	-0.0338039	-0.0368635	0.0106506	-0.0123196	0.195523	0.0511664	-0.154229	-0.238146	208	-16.3353
									254.7	-0.0141713	-0.0317004	-0.0232779	0.0184595	0.206743	0.0153407	-0.166887	-0.219218	207	-15.8723
									254.6	-0.0208394	-0.0588693	-0.0412139	0.0347212	0.145834	0.0375236	-0.190633	-0.21065	206	-14.2749
									254.5	-0.0332397	-0.0689159	-0.0368719	-0.0312364	0.166563	0.0711152	-0.227062	-0.185981	205	-12.3364
									254.4	-0.0308876	-0.0662301	-0.038942	-0.0521693	0.148225	0.0680476	-0.189532	-0.213643	204	-9.78381
									254.3	-0.0443681	-0.0926283	-0.0825929	-0.00904606	0.116426	0.0467201	-0.182987	-0.264371	203	-7.28654
									254.2	-0.0122509	-0.0856564	-0.0878474	-0.0708009	0.134765	0.0553286	-0.212088	-0.266337	202	-3.44512
									254.1	-0.00586015	-0.0922906	-0.059213	-0.0709659	0.110458	0.0547161	-0.215202	-0.261457	201	0.0156609
									254	-0.00564932	-0.131191	-0.0449446	-0.0650452	0.154901	0.073796	-0.202482	-0.261735	200	4.22791
									253.9	0.00712741	-0.131415	-0.0628218	-0.0704917	0.194905	0.053504	-0.205431	-0.274543	199	9.80097
									253.8	0.0272164	-0.145322	-0.098404	-0.0908971	0.179705	0.0618187	-0.192458	-0.272961	198	15.3558
									253.7	0.0520145	-0.142537	-0.118164	-0.0978256	0.176526	0.0121239	-0.177138	-0.253413	197	19.9635
									253.6	0.0532597	-0.156255	-0.129109	-0.149039	0.159576	0.0224992	-0.173737	-0.251856	196	24.788
									253.5	0.118734	-0.132516	-0.134909	-0.175864	0.201298	-0.00110362	-0.181477	-0.285558	195	31.988
									253.4	0.133998	-0.0733972	-0.150147	-0.165385	0.16686	0.00370849	-0.206649	-0.281458
									253.3	0.131206	-0.0888669	-0.191042	-0.136083	0.152311	-0.0495327	-0.201906	-0.285753
									253.2	0.122684	-0.123964	-0.16812	-0.139691	0.13544	-0.0604575	-0.218347	-0.230822
									253.1	0.136291	-0.165047	-0.234584	-0.156521	0.154196	-0.0916984	-0.229001	-0.242653
									253	0.130762	-0.135967	-0.255121	-0.165761	0.152007	-0.130878	-0.263705	-0.25772
									252.9	0.139059	-0.154482	-0.272447	-0.176471	0.102264	-0.121651	-0.289316	-0.245063
									252.8	0.134872	-0.162178	-0.299992	-0.183691	0.0752551	-0.128701	-0.283082	-0.241831
									252.7	0.121312	-0.181348	-0.353516	-0.209159	0.0502565	-0.141773	-0.215516	-0.239743
									252.6	0.126324	-0.188468	-0.38504	-0.209997	0.0484268	-0.17651	-0.231058	-0.267739
									252.5	0.0738516	-0.160353	-0.367192	-0.203337	0.0508572	-0.145627	-0.217706	-0.276195
									252.4	0.067678	-0.113446	-0.347313	-0.18094	0.0248713	-0.124598	-0.226574	-0.269902
									252.3	0.0978309	-0.112706	-0.345559	-0.177212	-0.0285471	-0.135932	-0.259705	-0.280738
									252.2	0.0842686	-0.0770053	-0.343013	-0.226808	-0.0586791	-0.140167	-0.261576	-0.28133
									252.1	0.117111	-0.0507546	-0.328938	-0.205265	-0.0538434	-0.118642	-0.272732	-0.263058
									252	0.117285	-0.0585102	-0.347771	-0.184508	-0.0279579	-0.0821687	-0.295314	-0.234135
									251.9	0.104032	-0.0537476	-0.386548	-0.200019	-0.0617268	-0.0968162	-0.276375	-0.258252
									251.8	0.0947978	-0.0778989	-0.417695	-0.212268	-0.0793988	-0.114646	-0.275732	-0.265507
									251.7	0.0691711	-0.100096	-0.384566	-0.239006	-0.0704646	-0.0487752	-0.271008	-0.26326
									251.6	0.0928413	-0.095608	-0.363562	-0.2142	-0.0614777	-0.0469196	-0.273357	-0.237171
									251.5	0.072173	-0.153288	-0.381232	-0.234968	-0.0859474	-0.0503175	-0.291086	-0.262699
									251.4	0.0603592	-0.119998	-0.396237	-0.272072	-0.096209	-0.0503226	-0.348067	-0.269732
									251.3	0.0729083	-0.106866	-0.380211	-0.267198	-0.12659	-0.05607	-0.414816	-0.241739
									251.2	0.0721537	-0.0706745	-0.362734	-0.245441	-0.148033	-0.070652	-0.432045	-0.28423
									251.1	0.0995957	-0.0369793	-0.352443	-0.292244	-0.137378	-0.0441435	-0.46725	-0.242787
									251	0.0706292	-0.0747457	-0.343586	-0.291057	-0.139541	-0.0690385	-0.472762	-0.247148
									250.9	0.0442362	-0.0295423	-0.371538	-0.312602	-0.146509	-0.0628793	-0.456215	-0.198389
									250.8	0.00910341	0.0228035	-0.380907	-0.369458	-0.174195	-0.109648	-0.393663	-0.190011
									250.7	-0.0124448	0.00524844	-0.384399	-0.403654	-0.227404	-0.135586	-0.449576	-0.208739
									250.6	-0.0715407	0.0802209	-0.372559	-0.404994	-0.226603	-0.149656	-0.441632	-0.19963
									250.5	-0.094913	0.0544659	-0.331468	-0.415309	-0.235642	-0.184366	-0.430713	-0.154414
									250.4	-0.0905099	0.0969908	-0.323613	-0.381069	-0.228011	-0.168334	-0.444326	-0.18693
									250.3	-0.106761	0.100042	-0.281948	-0.382392	-0.263052	-0.131441	-0.393285	-0.181946
									250.2	-0.101321	0.14086	-0.332308	-0.382131	-0.23423	-0.168815	-0.392648	-0.214804
									250.1	-0.158258	0.0939385	-0.344005	-0.362392	-0.275668	-0.145543	-0.353295	-0.240409
									250	-0.196571	0.11719	-0.360099	-0.390687	-0.276325	-0.167032	-0.378325	-0.236148
									249.9	-0.227546	0.0697101	-0.362744	-0.418435	-0.308996	-0.181809	-0.389303	-0.278758
									249.8	-0.205147	0.0559274	-0.389772	-0.427878	-0.314645	-0.19116	-0.373852	-0.255066
									249.7	-0.19363	0.09052	-0.466892	-0.4516	-0.327181	-0.212041	-0.360318	-0.208853
									249.6	-0.192279	0.105896	-0.482295	-0.401761	-0.310295	-0.198498	-0.328099	-0.188062
									249.5	-0.225084	0.0956861	-0.505789	-0.406626	-0.340267	-0.203116	-0.32329	-0.234263
									249.4	-0.234539	0.107876	-0.511211	-0.397561	-0.34629	-0.21074	-0.308405	-0.233412
									249.3	-0.222802	0.138531	-0.548288	-0.421033	-0.406103	-0.238565	-0.334125	-0.217599
									249.2	-0.246928	0.118508	-0.597727	-0.390351	-0.405179	-0.219705	-0.35801	-0.249048
									249.1	-0.278279	0.10592	-0.571156	-0.385034	-0.411969	-0.235037	-0.371101	-0.245766
									249	-0.282942	0.0870576	-0.572159	-0.385564	-0.403903	-0.223696	-0.378849	-0.214276
									248.9	-0.306668	0.0443469	-0.554151	-0.351982	-0.409666	-0.250612	-0.325651	-0.264246
									248.8	-0.319684	0.0650226	-0.565711	-0.337592	-0.425277	-0.279521	-0.398213	-0.316527
									248.7	-0.29605	0.0971961	-0.594976	-0.354089	-0.398012	-0.292824	-0.401053	-0.29565
									248.6	-0.297981	0.107762	-0.570292	-0.33666	-0.413057	-0.287462	-0.4241	-0.315094
									248.5	-0.277818	0.117145	-0.591368	-0.324668	-0.422454	-0.266859	-0.450339	-0.320587
									248.4	-0.259982	0.145011	-0.568409	-0.323887	-0.421929	-0.241452	-0.456576	-0.294048
									248.3	-0.283217	0.137804	-0.574471	-0.368067	-0.446681	-0.25048	-0.502566	-0.307318
									248.2	-0.277249	0.142889	-0.551213	-0.416237	-0.457945	-0.239609	-0.540022	-0.321953
									248.1	-0.278231	0.177786	-0.56223	-0.406105	-0.498158	-0.242223	-0.520351	-0.317256
									248	-0.291779	0.163002	-0.597456	-0.393364	-0.524365	-0.260324	-0.528877	-0.274537
									247.9	-0.327858	0.127985	-0.585343	-0.363786	-0.529787	-0.276338	-0.574573	-0.255454
									247.8	-0.311852	0.1325	-0.6119	-0.360709	-0.480951	-0.342996	-0.582374	-0.258279
									247.7	-0.331804	0.179253	-0.623316	-0.346912	-0.566885	-0.419464	-0.546907	-0.205274
									247.6	-0.324282	0.217133	-0.63399	-0.41694	-0.530004	-0.377615	-0.563126	-0.177154
									247.5	-0.33309	0.18713	-0.625032	-0.40623	-0.569886	-0.390021	-0.615588	-0.176981
									247.4	-0.331169	0.166815	-0.613616	-0.382936	-0.576781	-0.385941	-0.593185	-0.219423
									247.3	-0.347033	0.144249	-0.608685	-0.425205	-0.594441	-0.396974	-0.579202	-0.207115
									247.2	-0.344321	0.0740186	-0.565637	-0.445785	-0.610541	-0.408377	-0.580023	-0.182729
									247.1	-0.331114	0.0534462	-0.558573	-0.407822	-0.628949	-0.397662	-0.563257	-0.125335
									247	-0.294001	0.0432418	-0.541867	-0.452474	-0.642865	-0.384242	-0.617998	-0.105525
									246.9	-0.285041	0.0256923	-0.543677	-0.447224	-0.663364	-0.382279	-0.623371	-0.161711
									246.8	-0.29512	0.0172684	-0.535003	-0.447519	-0.666401	-0.360459	-0.64679	-0.203049
									246.7	-0.333242	0.00695764	-0.531767	-0.440249	-0.677187	-0.358264	-0.658066	-0.249037
									246.6	-0.34055	-0.0070892	-0.525718	-0.440718	-0.68321	-0.388139	-0.658814	-0.287454
									246.5	-0.333449	-0.0589263	-0.51863	-0.451233	-0.68191	-0.41109	-0.657569	-0.304805
									246.4	-0.33614	-0.0539939	-0.505115	-0.459525	-0.684919	-0.438564	-0.663777	-0.28573
									246.3	-0.363891	-0.0854163	-0.508731	-0.447839	-0.686978	-0.446981	-0.6452	-0.296898
									246.2	-0.347887	-0.12539	-0.51061	-0.45338	-0.673891	-0.457709	-0.662669	-0.267511
									246.1	-0.34204	-0.103819	-0.48482	-0.470102	-0.660956	-0.446796	-0.661187	-0.252893
									246	-0.365614	-0.110601	-0.51283	-0.447029	-0.695152	-0.476691	-0.652787	-0.277951
									245.9	-0.409115	-0.0902168	-0.524535	-0.455025	-0.71057	-0.496589	-0.666951	-0.28936
									245.8	-0.4325	-0.119353	-0.524781	-0.45248	-0.737738	-0.520078	-0.667434	-0.293551
									245.7	-0.435199	-0.0846982	-0.519993	-0.448478	-0.758787	-0.500642	-0.67548	-0.27122
									245.6	-0.454458	-0.0958935	-0.518116	-0.456345	-0.789669	-0.54873	-0.673825	-0.2841
									245.5	-0.477616	-0.0724272	-0.511935	-0.486479	-0.752105	-0.555295	-0.6948	-0.266764
									245.4	-0.507943	-0.0293187	-0.522492	-0.496937	-0.73968	-0.589314	-0.715536	-0.280067
									245.3	-0.600063	-0.0371864	-0.553438	-0.50215	-0.742964	-0.637875	-0.736399	-0.297644
									245.2	-0.659401	-0.131407	-0.587225	-0.533313	-0.73116	-0.61827	-0.747974	-0.302891
									245.1	-0.714477	-0.135819	-0.52264	-0.564754	-0.756681	-0.550496	-0.7993	-0.290952
									245	-0.710942	-0.121828	-0.536249	-0.584658	-0.724164	-0.572478	-0.815493	-0.293533
									244.9	-0.764299	-0.0844015	-0.499148	-0.572225	-0.746439	-0.596338	-0.849143	-0.333414
									244.8	-0.767306	-0.099418	-0.491316	-0.548928	-0.765	-0.574924	-0.861902	-0.34296
									244.7	-0.805306	-0.11878	-0.522931	-0.561412	-0.780092	-0.585908	-0.822962	-0.382257
									244.6	-0.822381	-0.135007	-0.499134	-0.561136	-0.758522	-0.632709	-0.873874	-0.391775
									244.5	-0.810861	-0.133045	-0.489976	-0.573235	-0.743941	-0.631172	-0.872704	-0.390947
									244.4	-0.837924	-0.149952	-0.516443	-0.584507	-0.809528	-0.63296	-0.84855	-0.392732
									244.3	-0.835341	-0.183205	-0.506718	-0.634651	-0.812036	-0.630054	-0.891455	-0.382243
									244.2	-0.83543	-0.213331	-0.580129	-0.636088	-0.826809	-0.667556	-0.930535	-0.369508
									244.1	-0.866538	-0.2755	-0.589086	-0.66028	-0.820598	-0.681963	-0.960032	-0.332216
									244	-0.920063	-0.273052	-0.62032	-0.68849	-0.773102	-0.702808	-0.962762	-0.358019
									243.9	-0.937962	-0.309811	-0.623872	-0.696449	-0.804712	-0.721291	-0.94967	-0.342252
									243.8	-0.965534	-0.373259	-0.695729	-0.701371	-0.85528	-0.802448	-0.949152	-0.342675
									243.7	-0.978586	-0.405459	-0.722965	-0.712924	-0.899325	-0.834344	-0.928884	-0.375153
									243.6	-1.01315	-0.404184	-0.728603	-0.744558	-0.91549	-0.897888	-1.03752	-0.373702
									243.5	-1.00837	-0.40441	-0.752537	-0.765511	-0.955992	-0.876959	-1.03868	-0.357584
									243.4	-1.01409	-0.442943	-0.762496	-0.75657	-1.00021	-0.964207	-1.07956	-0.394542
									243.3	-1.03057	-0.430604	-0.781944	-0.771037	-1.00498	-1.00493	-1.07727	-0.397441
									243.2	-1.04945	-0.439261	-0.782506	-0.756336	-1.00973	-1.02672	-1.09927	-0.404097
									243.1	-1.05923	-0.500139	-0.792134	-0.776673	-1.02602	-1.06542	-1.10282	-0.390437
									243	-1.07733	-0.582544	-0.769663	-0.770865	-1.03042	-1.09627	-1.0864	-0.402789
									242.9	-1.12783	-0.666253	-0.788248	-0.806918	-1.06002	-1.11283	-1.13087	-0.390149
									242.8	-1.14409	-0.707223	-0.830072	-0.84235	-1.07519	-1.14148	-1.11323	-0.448284
									242.7	-1.15387	-0.746581	-0.87031	-0.854647	-1.0725	-1.14652	-1.12741	-0.470634
									242.6	-1.16714	-0.756248	-0.893271	-0.846294	-1.06538	-1.17556	-1.11709	-0.540908
									242.5	-1.15079	-0.807919	-0.932828	-0.8427	-1.08673	-1.16343	-1.15885	-0.564634
									242.4	-1.14965	-0.83492	-0.972827	-0.884908	-1.09158	-1.22102	-1.15599	-0.557959
									242.3	-1.15937	-0.909839	-0.970594	-0.885802	-1.11372	-1.21661	-1.17229	-0.558416
									242.2	-1.2124	-0.908902	-1.05348	-0.931263	-1.13409	-1.26003	-1.14715	-0.613962
									242.1	-1.24579	-0.959588	-1.08266	-0.967924	-1.13992	-1.27651	-1.16972	-0.580273
									242	-1.30507	-0.983485	-1.1652	-0.992194	-1.13632	-1.31358	-1.1988	-0.615687
									241.9	-1.3314	-1.03872	-1.17869	-1.01956	-1.19861	-1.32367	-1.24588	-0.615152
									241.8	-1.33333	-1.09118	-1.15745	-1.06382	-1.15444	-1.37558	-1.25976	-0.630235
									241.7	-1.36237	-1.14091	-1.18425	-1.08621	-1.19766	-1.391	-1.2124	-0.65066
									241.6	-1.35857	-1.13907	-1.1788	-1.11717	-1.23904	-1.41399	-1.24945	-0.633925
									241.5	-1.38461	-1.1919	-1.21103	-1.18319	-1.30121	-1.43404	-1.23384	-0.676852
									241.4	-1.39227	-1.25674	-1.26061	-1.20206	-1.31087	-1.40766	-1.27199	-0.696903
									241.3	-1.47883	-1.26739	-1.33237	-1.24283	-1.34444	-1.43816	-1.25474	-0.749383
									241.2	-1.50138	-1.28411	-1.38058	-1.28976	-1.3879	-1.52392	-1.30702	-0.738495
									241.1	-1.54017	-1.33114	-1.4133	-1.33032	-1.41807	-1.52642	-1.34145	-0.759852
									241	-1.56282	-1.36334	-1.39025	-1.38629	-1.39683	-1.56958	-1.34263	-0.780178
									240.9	-1.59193	-1.39615	-1.39606	-1.4452	-1.44574	-1.61539	-1.34322	-0.752992
									240.8	-1.60575	-1.46208	-1.42151	-1.48193	-1.44308	-1.62531	-1.38484	-0.761347
									240.7	-1.68966	-1.48653	-1.43793	-1.53095	-1.49097	-1.65858	-1.39895	-0.748026
									240.6	-1.76398	-1.53059	-1.46525	-1.56718	-1.56394	-1.70475	-1.42042	-0.724292
									240.5	-1.86099	-1.55434	-1.49043	-1.60047	-1.64173	-1.74369	-1.34423	-0.735607
									240.4	-1.90653	-1.65075	-1.55774	-1.59975	-1.69782	-1.77416	-1.34948	-0.787638
									240.3	-1.9613	-1.72511	-1.65061	-1.65324	-1.6989	-1.81298	-1.38226	-0.785693
									240.2	-2.01865	-1.78616	-1.69564	-1.72226	-1.72986	-1.85826	-1.38021	-0.797404
									240.1	-2.01338	-1.84871	-1.75892	-1.74943	-1.7822	-1.90032	-1.37988	-0.799615
									240	-2.05288	-1.92481	-1.84532	-1.71507	-1.82631	-1.92834	-1.356	-0.809934
									239.9	-2.074	-1.96606	-1.92027	-1.7644	-1.89603	-2.00914	-1.34068	-0.812074
									239.8	-2.12911	-2.08466	-1.96331	-1.8292	-1.95101	-2.04182	-1.41736	-0.784774
									239.7	-2.17894	-2.12497	-1.95794	-1.8625	-1.96512	-2.04062	-1.42892	-0.780719
									239.6	-2.21306	-2.17697	-2.01435	-1.95118	-2.06067	-2.04404	-1.42499	-0.771737
									239.5	-2.26252	-2.22645	-2.05474	-2.01718	-2.13777	-2.0562	-1.45858	-0.84124
									239.4	-2.29798	-2.31625	-2.07956	-2.02867	-2.14667	-2.05493	-1.54478	-0.886767
									239.3	-2.36642	-2.3459	-2.09467	-2.0508	-2.13089	-2.09292	-1.54446	-0.909832
									239.2	-2.39707	-2.42831	-2.12561	-2.05746	-2.20161	-2.10386	-1.55832	-0.922657
									239.1	-2.44367	-2.45367	-2.22513	-2.08327	-2.23777	-2.15262	-1.58648	-0.893732
									239	-2.48096	-2.43547	-2.29668	-2.15094	-2.29216	-2.21186	-1.64003	-0.894951
									238.9	-2.53841	-2.48743	-2.38594	-2.18157	-2.36501	-2.24159	-1.69965	-0.934763
									238.8	-2.60678	-2.51012	-2.42084	-2.19352	-2.38892	-2.27217	-1.69139	-0.982153
									238.7	-2.64726	-2.54757	-2.46416	-2.26353	-2.44065	-2.30503	-1.77725	-1.04423
									238.6	-2.69833	-2.58065	-2.55644	-2.32882	-2.45839	-2.37636	-1.77846	-1.05312
									238.5	-2.79347	-2.62258	-2.59574	-2.39466	-2.49854	-2.43051	-1.81195	-1.04116
									238.4	-2.84503	-2.66648	-2.68234	-2.41881	-2.53822	-2.44931	-1.82371	-1.04838
									238.3	-2.92013	-2.7359	-2.7498	-2.50713	-2.59743	-2.49977	-1.83152	-1.04036
									238.2	-2.96926	-2.75111	-2.79818	-2.57008	-2.65272	-2.51955	-1.87957	-1.02368
									238.1	-3.04119	-2.78682	-2.85366	-2.65845	-2.75846	-2.54663	-1.9102	-1.07633
									238	-3.11124	-2.82262	-2.8801	-2.72586	-2.82883	-2.59728	-1.9459	-1.07597
									237.9	-3.13489	-2.8312	-2.91794	-2.72937	-2.86845	-2.63215	-1.98971	-1.08471
									237.8	-3.23181	-2.90124	-3.05518	-2.83524	-2.94943	-2.69589	-2.03794	-1.13488
									237.7	-3.30081	-2.94595	-3.12321	-2.86754	-3.00282	-2.7673	-2.09238	-1.20288
									237.6	-3.3878	-3.01694	-3.17673	-2.98586	-3.0242	-2.81984	-2.13281	-1.21032
									237.5	-3.41011	-3.13788	-3.29034	-3.07322	-3.07715	-2.83954	-2.1884	-1.23983
									237.4	-3.44891	-3.17177	-3.34146	-3.11261	-3.1106	-2.87186	-2.19258	-1.23199
									237.3	-3.56434	-3.21846	-3.39209	-3.21593	-3.18338	-2.91917	-2.24883	-1.26239
									237.2	-3.61437	-3.27905	-3.48518	-3.27335	-3.25972	-2.9826	-2.32086	-1.30675
									237.1	-3.6774	-3.3367	-3.57307	-3.36487	-3.34287	-3.01098	-2.3674	-1.31352
									237	-3.77547	-3.42426	-3.65734	-3.383	-3.40174	-3.02794	-2.43439	-1.39733
									236.9	-3.8271	-3.53254	-3.74049	-3.47425	-3.49222	-3.06554	-2.45491	-1.50102
									236.8	-3.8519	-3.59477	-3.86038	-3.53351	-3.55866	-3.09826	-2.5139	-1.54053
									236.7	-3.95034	-3.71905	-3.92449	-3.58561	-3.64768	-3.22867	-2.5493	-1.57459
									236.6	-4.01248	-3.81049	-4.02504	-3.67055	-3.69272	-3.28651	-2.5196	-1.55859
									236.5	-4.07716	-3.90504	-4.07196	-3.71233	-3.8269	-3.314	-2.54366	-1.61718
									236.4	-4.15863	-3.96238	-4.17721	-3.84867	-3.90862	-3.37705	-2.58222	-1.63864
									236.3	-4.25107	-4.0893	-4.27129	-3.91889	-3.9793	-3.45236	-2.64957	-1.6802
									236.2	-4.36886	-4.15662	-4.34378	-3.94733	-4.03011	-3.49433	-2.6694	-1.69947
									236.1	-4.4311	-4.20351	-4.42618	-4.02218	-4.12451	-3.55765	-2.69654	-1.71808
									236	-4.50089	-4.32939	-4.51885	-4.112	-4.17832	-3.62027	-2.71735	-1.75515
									235.9	-4.57291	-4.40043	-4.64139	-4.16961	-4.2183	-3.72867	-2.78782	-1.80949
									235.8	-4.67847	-4.4397	-4.71561	-4.24482	-4.32902	-3.81147	-2.82778	-1.84446
									235.7	-4.79785	-4.51713	-4.80188	-4.36344	-4.36082	-3.85478	-2.88001	-1.92863
									235.6	-4.82163	-4.57257	-4.88786	-4.45421	-4.43331	-3.8882	-2.85807	-1.91457
									235.5	-4.92015	-4.64815	-4.9611	-4.54398	-4.4869	-3.91644	-2.93365	-1.90936
									235.4	-4.98847	-4.6888	-5.02304	-4.62356	-4.5778	-3.95285	-2.94972	-1.93047
									235.3	-5.06737	-4.7796	-5.05172	-4.71363	-4.62994	-3.97498	-2.98523	-1.96172
									235.2	-5.13534	-4.86112	-5.1512	-4.79604	-4.70548	-3.9983	-2.99333	-1.99946
									235.1	-5.1642	-4.92998	-5.2834	-4.88441	-4.75027	-4.03121	-2.99204	-2.04006
									235	-5.24277	-5.03924	-5.35831	-4.94413	-4.81684	-4.13693	-3.05117	-2.13667
									234.9	-5.32743	-5.15696	-5.43589	-5.03802	-4.88509	-4.17662	-3.10883	-2.17927
									234.8	-5.47448	-5.27735	-5.53286	-5.1096	-4.97098	-4.25673	-3.15708	-2.22942
									234.7	-5.60662	-5.39996	-5.68906	-5.21835	-5.08362	-4.30117	-3.22018	-2.29482
									234.6	-5.69362	-5.51289	-5.73631	-5.3028	-5.15207	-4.37194	-3.25316	-2.33156
									234.5	-5.76403	-5.59891	-5.83388	-5.43785	-5.25018	-4.44699	-3.30058	-2.35272
									234.4	-5.86502	-5.73103	-5.99633	-5.48025	-5.28889	-4.55055	-3.29343	-2.407
									234.3	-5.96212	-5.83819	-6.10575	-5.58703	-5.39626	-4.60202	-3.35679	-2.4463
									234.2	-6.05337	-5.8928	-6.17445	-5.64334	-5.4945	-4.67875	-3.38401	-2.45086
									234.1	-6.15719	-5.97993	-6.25183	-5.72072	-5.55341	-4.76339	-3.42813	-2.516
									234	-6.28289	-6.05392	-6.30008	-5.82614	-5.66606	-4.84726	-3.4675	-2.50198
									233.9	-6.40502	-6.22645	-6.40245	-5.93957	-5.75627	-4.86528	-3.50052	-2.54172
									233.8	-6.53255	-6.39151	-6.50923	-6.08273	-5.82608	-4.96858	-3.55672	-2.58861
									233.7	-6.59867	-6.48891	-6.59276	-6.1091	-5.86992	-5.0198	-3.56466	-2.62795
									233.6	-6.63578	-6.61948	-6.65013	-6.16844	-5.95948	-5.05576	-3.63933	-2.66317
									233.5	-6.75614	-6.74878	-6.76572	-6.3032	-6.03283	-5.13135	-3.67064	-2.66932
									233.4	-6.8577	-6.84056	-6.80664	-6.37585	-6.08023	-5.21941	-3.71874	-2.69838
									233.3	-6.97162	-6.91613	-6.84941	-6.45069	-6.17925	-5.2764	-3.7558	-2.72332
									233.2	-7.1052	-7.03442	-6.98703	-6.56963	-6.33384	-5.36761	-3.91622	-2.73633
									233.1	-7.25921	-7.11518	-7.07811	-6.64493	-6.40355	-5.41894	-3.9711	-2.77396
									233	-7.38746	-7.20769	-7.20204	-6.71544	-6.50765	-5.50911	-4.02201	-2.80602
									232.9	-7.55065	-7.26906	-7.2769	-6.78058	-6.61087	-5.63521	-4.08939	-2.82648
									232.8	-7.69528	-7.39383	-7.36094	-6.91513	-6.72139	-5.66316	-4.17964	-2.85527
									232.7	-7.78254	-7.51569	-7.47264	-7.02283	-6.79155	-5.70208	-4.18139	-2.90652
									232.6	-7.91001	-7.67712	-7.62157	-7.13676	-6.8697	-5.78615	-4.26412	-2.96251
									232.5	-8.03481	-7.8357	-7.72425	-7.21722	-6.94724	-5.79913	-4.35903	-3.023
									232.4	-8.12365	-7.92408	-7.85611	-7.34315	-7.02281	-5.84791	-4.41765	-3.09055
									232.3	-8.25327	-8.03163	-7.96782	-7.43578	-7.14259	-5.9295	-4.44338	-3.11348
									232.2	-8.38073	-8.13786	-8.10677	-7.54983	-7.2219	-5.9872	-4.49205	-3.13366
									232.1	-8.4696	-8.21173	-8.22273	-7.62605	-7.33006	-6.07331	-4.55288	-3.20506
									232	-8.55526	-8.3706	-8.34978	-7.72585	-7.3992	-6.15773	-4.62918	-3.23285
									231.9	-8.70703	-8.51779	-8.45047	-7.84986	-7.44923	-6.22811	-4.65341	-3.26744
									231.8	-8.84414	-8.62046	-8.54917	-7.94216	-7.55813	-6.35153	-4.71225	-3.3139
									231.7	-8.91624	-8.65405	-8.62187	-8.02137	-7.65127	-6.42943	-4.75177	-3.36151
									231.6	-9.05264	-8.7779	-8.73353	-8.11344	-7.78616	-6.50371	-4.81946	-3.38323
									231.5	-9.21175	-8.92543	-8.82446	-8.30526	-7.87983	-6.58747	-4.88847	-3.39876
									231.4	-9.36511	-9.02064	-8.86786	-8.38607	-7.94708	-6.66666	-4.96605	-3.42118
									231.3	-9.44833	-9.16596	-8.92034	-8.48316	-8.0298	-6.71291	-5.00486	-3.48932
									231.2	-9.54845	-9.27449	-9.04564	-8.55294	-8.08623	-6.77252	-5.04461	-3.5489
									231.1	-9.69641	-9.37027	-9.21009	-8.66784	-8.18616	-6.8701	-5.09423	-3.60833
									231	-9.80457	-9.49172	-9.2989	-8.74771	-8.26087	-6.96277	-5.13197	-3.6266
									230.9	-9.93345	-9.54776	-9.39565	-8.86741	-8.33164	-7.01172	-5.17723	-3.62395
									230.8	-10.0239	-9.70158	-9.54967	-9.00237	-8.45977	-7.09508	-5.19126	-3.62886
									230.7	-10.1931	-9.86924	-9.69154	-9.13207	-8.58435	-7.20047	-5.25238	-3.68041
									230.6	-10.3445	-9.96192	-9.75737	-9.26509	-8.7021	-7.24263	-5.2989	-3.76089
									230.5	-10.4727	-10.1417	-9.85781	-9.33107	-8.81623	-7.31136	-5.34136	-3.82225
									230.4	-10.6692	-10.2403	-9.96106	-9.4453	-8.9107	-7.36707	-5.35614	-3.84474
									230.3	-10.7555	-10.3601	-10.0942	-9.53407	-9.01348	-7.48496	-5.4192	-3.92077
									230.2	-10.9051	-10.4788	-10.2344	-9.63658	-9.11415	-7.55416	-5.49982	-3.93396
									230.1	-11.0287	-10.6505	-10.3031	-9.76363	-9.23027	-7.60436	-5.57546	-3.99343
									230	-11.094	-10.7597	-10.4217	-9.80857	-9.33586	-7.67689	-5.60253	-3.99618
									229.9	-11.2466	-10.932	-10.5763	-9.91025	-9.48579	-7.74232	-5.6283	-4.00104
									229.8	-11.389	-11.0661	-10.685	-10.0095	-9.57907	-7.83979	-5.67766	-3.98927
									229.7	-11.5223	-11.226	-10.7776	-10.0733	-9.60554	-7.91873	-5.71984	-4.01953
									229.6	-11.6827	-11.3043	-10.8761	-10.1777	-9.6525	-8.0116	-5.75718	-4.09437
									229.5	-11.7936	-11.442	-11.0182	-10.3056	-9.70357	-8.13167	-5.81939	-4.13681
									229.4	-11.8572	-11.5622	-11.0834	-10.363	-9.76101	-8.20954	-5.85694	-4.18013
									229.3	-11.9664	-11.6569	-11.1616	-10.4507	-9.84631	-8.20723	-5.8889	-4.18108
									229.2	-12.0277	-11.7968	-11.2682	-10.4908	-9.92318	-8.27981	-5.96002	-4.22122
									229.1	-12.1566	-11.8553	-11.307	-10.5947	-10.0278	-8.36184	-6.04272	-4.23101
									229	-12.3028	-12.0113	-11.4238	-10.6767	-10.1101	-8.44806	-6.07619	-4.2883
									228.9	-12.4538	-12.1604	-11.5236	-10.7519	-10.2302	-8.55552	-6.06111	-4.30026
									228.8	-12.6193	-12.2576	-11.5832	-10.8528	-10.2754	-8.64644	-6.10743	-4.31822
									228.7	-12.7313	-12.3781	-11.6871	-10.9643	-10.367	-8.71833	-6.15441	-4.37736
									228.6	-12.8086	-12.4893	-11.7704	-11.0413	-10.4079	-8.80376	-6.18669	-4.34804
									228.5	-12.9671	-12.6362	-11.8349	-11.1063	-10.5006	-8.86794	-6.1927	-4.34296
									228.4	-13.1036	-12.7095	-11.9749	-11.2596	-10.5388	-8.92096	-6.26181	-4.40428
									228.3	-13.1722	-12.7487	-12.0607	-11.3506	-10.6536	-9.00418	-6.28902	-4.46011
									228.2	-13.3346	-12.9062	-12.1976	-11.4784	-10.7212	-9.03973	-6.35352	-4.50242
									228.1	-13.475	-12.9926	-12.2765	-11.5528	-10.7448	-9.11407	-6.40887	-4.49653
									228	-13.5613	-13.1655	-12.3814	-11.6461	-10.8647	-9.15664	-6.4363	-4.50745
									227.9	-13.6517	-13.2677	-12.4735	-11.74	-10.9547	-9.21277	-6.47457	-4.54169
									227.8	-13.7352	-13.3658	-12.5543	-11.8549	-11.0358	-9.26716	-6.55312	-4.5281
									227.7	-13.9018	-13.4531	-12.6448	-11.9351	-11.0965	-9.30267	-6.61991	-4.55132
									227.6	-13.9945	-13.5218	-12.7156	-12.0169	-11.1492	-9.35541	-6.69369	-4.59158
									227.5	-14.0493	-13.6249	-12.7569	-12.0653	-11.1924	-9.39912	-6.76516	-4.6157
									227.4	-14.1145	-13.7868	-12.8601	-12.161	-11.2796	-9.4819	-6.77951	-4.66708
									227.3	-14.2578	-13.851	-12.8894	-12.1972	-11.3464	-9.52403	-6.82901	-4.74183
									227.2	-14.3736	-13.9724	-12.9735	-12.2661	-11.4266	-9.57447	-6.83668	-4.78711
									227.1	-14.4891	-14.1261	-13.1483	-12.3438	-11.4554	-9.63986	-6.94069	-4.86128
									227	-14.6265	-14.2073	-13.2507	-12.4296	-11.5332	-9.68703	-6.99797	-4.86879
									226.9	-14.7873	-14.325	-13.2944	-12.4263	-11.5327	-9.79065	-7.07889	-4.85412
									226.8	-14.9285	-14.3978	-13.3252	-12.5298	-11.6132	-9.83627	-7.08609	-4.85001
									226.7	-15.0809	-14.4496	-13.3904	-12.62	-11.6543	-9.86502	-7.15451	-4.85137
									226.6	-15.1877	-14.5181	-13.4673	-12.6955	-11.7309	-9.86594	-7.18411	-4.90984
									226.5	-15.2373	-14.571	-13.5183	-12.7674	-11.7557	-9.89146	-7.18319	-4.94277
									226.4	-15.3248	-14.6313	-13.5629	-12.8253	-11.7872	-9.89623	-7.20032	-4.96432
									226.3	-15.3858	-14.6239	-13.654	-12.9174	-11.845	-9.94476	-7.23082	-4.93817
									226.2	-15.5029	-14.6326	-13.6758	-13.0048	-11.8963	-9.96325	-7.24977	-4.95368
									226.1	-15.5841	-14.6928	-13.7304	-13.1068	-11.9994	-9.98159	-7.30054	-4.95474
									226	-15.6439	-14.7647	-13.7872	-13.1275	-12.073	-10.0261	-7.33691	-4.93382
									225.9	-15.6773	-14.8106	-13.8162	-13.2157	-12.0991	-10.0715	-7.37074	-4.92275
									225.8	-15.76	-14.8773	-13.8702	-13.2639	-12.1795	-10.0855	-7.38393	-4.93018
									225.7	-15.8562	-14.9151	-13.972	-13.3066	-12.2568	-10.1618	-7.41309	-4.97024
									225.6	-15.9104	-14.9917	-14.0219	-13.3798	-12.32	-10.222	-7.45843	-4.96178
									225.5	-15.9842	-15.0047	-14.0864	-13.4182	-12.3801	-10.2165	-7.4953	-5.00195
									225.4	-16.0873	-15.0653	-14.2057	-13.473	-12.4498	-10.2604	-7.57988	-4.97471
									225.3	-16.125	-15.1315	-14.296	-13.5141	-12.5398	-10.2801	-7.64429	-5.03477
									225.2	-16.1462	-15.1674	-14.3918	-13.5426	-12.6027	-10.2974	-7.65549	-5.04462
									225.1	-16.2273	-15.2264	-14.508	-13.6354	-12.6454	-10.3752	-7.6378	-5.05134
									225	-16.2994	-15.3029	-14.5718	-13.6826	-12.6852	-10.4111	-7.63016	-5.09447
									224.9	-16.3707	-15.3442	-14.639	-13.7413	-12.7209	-10.4133	-7.67349	-5.08954
									224.8	-16.4405	-15.43	-14.7233	-13.7474	-12.7169	-10.4604	-7.70149	-5.08578
									224.7	-16.4511	-15.4771	-14.7661	-13.7772	-12.6961	-10.4367	-7.69698	-5.07348
									224.6	-16.4834	-15.5501	-14.7754	-13.8351	-12.764	-10.4831	-7.68799	-5.12477
									224.5	-16.5359	-15.6165	-14.7632	-13.8675	-12.8167	-10.5409	-7.73978	-5.14693
									224.4	-16.5606	-15.6726	-14.8031	-13.9202	-12.8823	-10.5081	-7.73768	-5.19154
									224.3	-16.6136	-15.6826	-14.8605	-13.9946	-12.9459	-10.5707	-7.74471	-5.16199
									224.2	-16.6952	-15.7295	-14.9189	-14.0295	-12.9994	-10.6238	-7.69754	-5.16554
									224.1	-16.7264	-15.7748	-14.9786	-14.0608	-13.0499	-10.6115	-7.69837	-5.18216
									224	-16.6918	-15.879	-14.9587	-14.1014	-13.1114	-10.6271	-7.69868	-5.18696
									223.9	-16.7381	-15.9181	-15.002	-14.1305	-13.0946	-10.6517	-7.72339	-5.23064
									223.8	-16.717	-15.8978	-15.0758	-14.1974	-13.1159	-10.697	-7.7364	-5.23106
									223.7	-16.7185	-15.9549	-15.0778	-14.2698	-13.1557	-10.7077	-7.71301	-5.22818
									223.6	-16.7065	-16.0044	-15.1198	-14.3705	-13.189	-10.6846	-7.76775	-5.21253
									223.5	-16.7335	-16.0849	-15.1111	-14.4117	-13.2054	-10.6925	-7.80084	-5.21487
									223.4	-16.7366	-16.1378	-15.14	-14.4092	-13.1973	-10.707	-7.81396	-5.22428
									223.3	-16.8088	-16.1775	-15.1863	-14.4079	-13.2195	-10.7272	-7.84986	-5.28328
									223.2	-16.8427	-16.2118	-15.1838	-14.486	-13.1903	-10.7453	-7.89352	-5.3133
									223.1	-16.9334	-16.2588	-15.2295	-14.4642	-13.1921	-10.7595	-7.91196	-5.30679
									223	-16.9872	-16.273	-15.2462	-14.5375	-13.244	-10.779	-7.96269	-5.35996
									222.9	-17.0136	-16.3214	-15.247	-14.5236	-13.2404	-10.7868	-7.96671	-5.32298
									222.8	-17.0168	-16.3504	-15.2522	-14.5492	-13.1973	-10.8085	-7.96615	-5.29166
									222.7	-16.9968	-16.3639	-15.2876	-14.5875	-13.2668	-10.8247	-7.97866	-5.33421
									222.6	-17.07	-16.3367	-15.2259	-14.5694	-13.2694	-10.8956	-8.04121	-5.38796
									222.5	-17.0519	-16.3001	-15.2043	-14.5794	-13.2845	-10.8801	-8.05807	-5.40913
									222.4	-17.0434	-16.3289	-15.2395	-14.5895	-13.3678	-10.901	-8.08874	-5.38127
									222.3	-17.0027	-16.3464	-15.257	-14.6456	-13.3298	-10.9204	-8.10654	-5.37973
									222.2	-17.0421	-16.3694	-15.2785	-14.646	-13.3052	-10.8998	-8.10842	-5.35855
									222.1	-17.0828	-16.3863	-15.2939	-14.6813	-13.3095	-10.8861	-8.11676	-5.352
									222	-17.1103	-16.3847	-15.2782	-14.6868	-13.3065	-10.8884	-8.0853	-5.36998
									221.9	-17.1016	-16.4374	-15.3148	-14.6972	-13.3293	-10.86	-8.05206	-5.40047
									221.8	-17.1709	-16.3792	-15.3061	-14.761	-13.3164	-10.8549	-8.06354	-5.39929
									221.7	-17.2033	-16.4169	-15.3071	-14.7912	-13.2889	-10.874	-8.10156	-5.44118
									221.6	-17.1744	-16.3826	-15.2705	-14.8142	-13.3081	-10.9112	-8.12272	-5.53015
									221.5	-17.1632	-16.3385	-15.2727	-14.8747	-13.3189	-10.9401	-8.12168	-5.53021
									221.4	-17.1408	-16.3817	-15.3229	-14.8698	-13.359	-10.9241	-8.12216	-5.5486
									221.3	-17.1591	-16.4305	-15.3214	-14.8607	-13.3992	-10.8771	-8.16303	-5.52412
									221.2	-17.1678	-16.3946	-15.3233	-14.9452	-13.4059	-10.9214	-8.18081	-5.55097
									221.1	-17.1994	-16.4175	-15.3027	-14.93	-13.3845	-10.9683	-8.16874	-5.57395
									221	-17.2807	-16.4222	-15.3032	-14.9795	-13.3992	-11.0123	-8.17282	-5.56323
									220.9	-17.2847	-16.4204	-15.3592	-14.978	-13.3922	-11.0158	-8.20093	-5.57251
									220.8	-17.2725	-16.4196	-15.4122	-15.0066	-13.3737	-11.0415	-8.22256	-5.57887
									220.7	-17.1893	-16.3649	-15.3914	-15.0355	-13.3568	-11.0648	-8.20465	-5.55309
									220.6	-17.1726	-16.409	-15.4611	-15.0248	-13.3455	-11.0762	-8.23815	-5.56692
									220.5	-17.1058	-16.4265	-15.4525	-15.0434	-13.3542	-11.0692	-8.21158	-5.58865
									220.4	-17.1013	-16.4535	-15.5054	-15.0413	-13.3747	-11.0871	-8.17188	-5.5568
									220.3	-17.1013	-16.4562	-15.475	-15.0342	-13.4032	-11.1195	-8.16527	-5.56831
									220.2	-17.0837	-16.3743	-15.4584	-15.0355	-13.4025	-11.1488	-8.21505	-5.57068
									220.1	-17.0478	-16.4352	-15.4198	-14.9934	-13.4388	-11.0912	-8.21768	-5.53319
									220	-17.0695	-16.4823	-15.4131	-14.995	-13.4184	-11.0779	-8.16961	-5.54008
									219.9	-16.9999	-16.4533	-15.4445	-14.9443	-13.4236	-11.1309	-8.2094	-5.55721
									219.8	-16.9851	-16.4409	-15.4663	-14.9489	-13.4687	-11.1679	-8.16694	-5.57173
									219.7	-16.9805	-16.4105	-15.4631	-14.9645	-13.3938	-11.1809	-8.17078	-5.57796
									219.6	-16.9981	-16.3559	-15.4608	-14.9701	-13.3738	-11.2012	-8.13504	-5.58065
									219.5	-16.9708	-16.3598	-15.4199	-14.9652	-13.3364	-11.1891	-8.13842	-5.57415
									219.4	-16.9916	-16.3381	-15.406	-14.9679	-13.3062	-11.1924	-8.14863	-5.60631
									219.3	-16.9029	-16.3054	-15.4328	-14.9961	-13.2857	-11.1951	-8.08674	-5.56797
									219.2	-16.9457	-16.2847	-15.4316	-14.9304	-13.2892	-11.1923	-8.08895	-5.59173
									219.1	-16.9342	-16.2345	-15.3848	-14.9361	-13.2647	-11.2113	-8.08775	-5.5904
									219	-16.9168	-16.2382	-15.443	-14.9836	-13.2183	-11.2189	-8.10327	-5.58257
									218.9	-16.8792	-16.2319	-15.459	-14.9551	-13.1915	-11.2121	-8.16824	-5.53447
									218.8	-16.8514	-16.2523	-15.4601	-14.9675	-13.2444	-11.2254	-8.13638	-5.49921
									218.7	-16.8886	-16.2272	-15.4374	-14.9345	-13.2103	-11.211	-8.1774	-5.51554
									218.6	-16.8602	-16.2229	-15.4399	-14.9716	-13.2243	-11.2446	-8.17274	-5.51759
									218.5	-16.8072	-16.1937	-15.4235	-15.0024	-13.2326	-11.2627	-8.1699	-5.56727
									218.4	-16.7663	-16.1843	-15.4838	-15.0449	-13.2762	-11.2723	-8.21133	-5.53594
									218.3	-16.6728	-16.132	-15.4958	-14.9944	-13.2782	-11.3095	-8.19246	-5.46558
									218.2	-16.6121	-16.0997	-15.4515	-14.9637	-13.2743	-11.3127	-8.18432	-5.48025
									218.1	-16.5973	-16.0817	-15.4489	-14.9616	-13.2762	-11.3271	-8.15878	-5.45728
									218	-16.5674	-16.059	-15.4072	-14.9094	-13.245	-11.38	-8.13734	-5.51154
									217.9	-16.5622	-16.0975	-15.3863	-14.8975	-13.2905	-11.4219	-8.14352	-5.53775
									217.8	-16.5193	-16.0654	-15.4481	-14.8864	-13.2755	-11.428	-8.16391	-5.56194
									217.7	-16.4867	-16.0332	-15.4478	-14.8934	-13.2002	-11.432	-8.16364	-5.59809
									217.6	-16.4778	-16.0654	-15.4547	-14.8838	-13.232	-11.4539	-8.18598	-5.62127
									217.5	-16.4976	-16.1278	-15.4805	-14.8941	-13.2928	-11.4459	-8.15559	-5.7093
									217.4	-16.4813	-16.1013	-15.483	-14.9049	-13.2749	-11.4358	-8.2005	-5.737
									217.3	-16.4947	-16.1169	-15.4886	-14.8931	-13.2479	-11.3957	-8.18719	-5.69167
									217.2	-16.4626	-16.1115	-15.4945	-14.8704	-13.2462	-11.3721	-8.21348	-5.71995
									217.1	-16.4455	-16.1137	-15.4808	-14.9021	-13.2695	-11.3639	-8.21285	-5.68035
									217	-16.4469	-16.0756	-15.4792	-14.856	-13.263	-11.4165	-8.16857	-5.70275
									216.9	-16.4168	-16.0757	-15.4653	-14.8159	-13.2569	-11.3852	-8.14235	-5.68728
									216.8	-16.4332	-16.0734	-15.4514	-14.8423	-13.2291	-11.3713	-8.1594	-5.67537
									216.7	-16.3617	-16.0616	-15.4346	-14.8504	-13.1813	-11.3791	-8.23521	-5.68235
									216.6	-16.3594	-16.0545	-15.4125	-14.8335	-13.1479	-11.3378	-8.24986	-5.75338
									216.5	-16.3325	-16.0344	-15.4377	-14.8205	-13.1233	-11.3342	-8.24617	-5.76467
									216.4	-16.3423	-16.0547	-15.3716	-14.8981	-13.093	-11.303	-8.24008	-5.81768
									216.3	-16.349	-16.0889	-15.3653	-14.8921	-13.1385	-11.2943	-8.25763	-5.87585
									216.2	-16.3135	-16.0568	-15.3528	-14.8965	-13.0495	-11.3133	-8.26594	-5.82925
									216.1	-16.3008	-16.047	-15.3796	-14.8729	-13.0409	-11.3603	-8.32363	-5.79777
									216	-16.3464	-15.9976	-15.3768	-14.898	-13.046	-11.3867	-8.29024	-5.78565
									215.9	-16.3313	-15.9905	-15.319	-14.8892	-13.0409	-11.3715	-8.32232	-5.84391
									215.8	-16.2739	-15.9659	-15.2913	-14.8075	-12.9853	-11.3377	-8.37779	-5.8063
									215.7	-16.2772	-15.9249	-15.2892	-14.8641	-13.0117	-11.3785	-8.41819	-5.8259
									215.6	-16.2053	-15.8478	-15.3023	-14.8109	-12.9653	-11.3581	-8.44793	-5.87916
									215.5	-16.2434	-15.8502	-15.3221	-14.8184	-12.9867	-11.3242	-8.46311	-5.91854
									215.4	-16.3197	-15.8922	-15.2664	-14.84	-12.9954	-11.2869	-8.49907	-5.92999
									215.3	-16.3481	-15.8434	-15.2733	-14.7935	-13.0321	-11.3304	-8.51971	-5.96597
									215.2	-16.338	-15.7802	-15.2641	-14.7815	-13.0755	-11.352	-8.54606	-5.96866
									215.1	-16.3623	-15.7388	-15.3187	-14.7669	-13.022	-11.4167	-8.49074	-6.00725
									215	-16.3513	-15.6915	-15.3392	-14.7614	-13.0186	-11.4285	-8.466	-6.00811
									214.9	-16.3671	-15.6788	-15.3571	-14.8254	-12.9934	-11.455	-8.49354	-5.95833
									214.8	-16.3348	-15.7463	-15.3861	-14.7925	-13.0861	-11.4933	-8.49166	-6.00048
									214.7	-16.275	-15.7217	-15.4318	-14.7869	-13.1224	-11.5074	-8.51077	-6.00189
									214.6	-16.2642	-15.7129	-15.4675	-14.8418	-13.1382	-11.5528	-8.5005	-5.99347
									214.5	-16.2383	-15.6502	-15.4958	-14.8054	-13.1495	-11.5689	-8.55544	-6.06561
									214.4	-16.2645	-15.6759	-15.4951	-14.7914	-13.1801	-11.5657	-8.62709	-6.12712
									214.3	-16.2985	-15.76	-15.5354	-14.7433	-13.2023	-11.6562	-8.66167	-6.12932
									214.2	-16.273	-15.7683	-15.612	-14.7522	-13.1808	-11.629	-8.67084	-6.14404
									214.1	-16.3364	-15.81	-15.6857	-14.7564	-13.2392	-11.6665	-8.67459	-6.12126
									214	-16.3141	-15.8379	-15.7481	-14.7745	-13.2258	-11.6852	-8.68479	-6.13203
									213.9	-16.3463	-15.8227	-15.7727	-14.8121	-13.2861	-11.666	-8.73632	-6.0724
									213.8	-16.3159	-15.776	-15.7439	-14.8042	-13.3242	-11.7523	-8.7439	-6.1331
									213.7	-16.2776	-15.753	-15.7985	-14.7663	-13.3711	-11.8219	-8.80073	-6.15693
									213.6	-16.2663	-15.7941	-15.7798	-14.8079	-13.3482	-11.8294	-8.80273	-6.15567
									213.5	-16.2684	-15.7777	-15.7789	-14.8619	-13.3767	-11.8473	-8.83722	-6.19914
									213.4	-16.2439	-15.8066	-15.8224	-14.7987	-13.3275	-11.8843	-8.8573	-6.22363
									213.3	-16.2619	-15.816	-15.8289	-14.8394	-13.3562	-11.9098	-8.87478	-6.27934
									213.2	-16.2606	-15.8452	-15.911	-14.8528	-13.3838	-11.908	-8.92407	-6.29188
									213.1	-16.3283	-15.8782	-15.9407	-14.8516	-13.3799	-11.9026	-8.96244	-6.29906
									213	-16.3052	-15.9004	-15.9548	-14.9004	-13.3999	-11.96	-8.97846	-6.28862
									212.9	-16.3464	-15.9154	-15.907	-14.8595	-13.4598	-11.9945	-9.00875	-6.33514
									212.8	-16.3455	-15.9525	-15.9104	-14.8599	-13.4901	-11.9724	-9.03595	-6.38227
									212.7	-16.3727	-16.0738	-15.962	-14.8381	-13.5736	-11.9488	-9.03226	-6.3617
									212.6	-16.3512	-16.099	-15.9888	-14.8411	-13.6204	-11.9422	-8.9826	-6.36238
									212.5	-16.3966	-16.1014	-15.9355	-14.8513	-13.6643	-11.9357	-8.96124	-6.43072
									212.4	-16.4215	-16.1545	-15.9023	-14.8614	-13.7095	-11.962	-9.00851	-6.51186
									212.3	-16.4783	-16.1734	-16.0185	-14.8841	-13.7398	-11.9518	-9.0295	-6.5408
									212.2	-16.4638	-16.1339	-16.0021	-14.8956	-13.7673	-11.9005	-9.04811	-6.57962
									212.1	-16.5187	-16.1605	-15.9986	-14.9056	-13.7554	-11.8886	-9.09324	-6.60663
									212	-16.5147	-16.1664	-15.976	-14.9296	-13.8431	-11.911	-9.16026	-6.63392
									211.9	-16.5294	-16.1744	-16.0394	-14.9517	-13.9441	-11.9224	-9.24315	-6.64438
									211.8	-16.4784	-16.2146	-16.0287	-14.9838	-13.9836	-11.9293	-9.29894	-6.61993
									211.7	-16.468	-16.1713	-16.0486	-15.0099	-14.0018	-11.9503	-9.29997	-6.61465
									211.6	-16.5001	-16.1845	-16.0453	-15.035	-13.9459	-11.9574	-9.35504	-6.63233
									211.5	-16.4784	-16.221	-16.0234	-15.1056	-14.0015	-11.9903	-9.33419	-6.68524
									211.4	-16.4695	-16.2489	-16.0148	-15.0734	-14.0629	-11.9426	-9.41747	-6.68912
									211.3	-16.4617	-16.2582	-16.0689	-15.084	-14.1049	-11.9435	-9.49936	-6.74156
									211.2	-16.4546	-16.2614	-16.0631	-15.0389	-14.142	-11.9579	-9.52545	-6.77316
									211.1	-16.5073	-16.2591	-16.1272	-15.0526	-14.1983	-11.9701	-9.57027	-6.80535
									211	-16.4746	-16.3428	-16.1203	-15.0601	-14.1943	-12.006	-9.57278	-6.89974
									210.9	-16.4507	-16.3741	-16.1041	-15.1001	-14.24	-12.0586	-9.5807	-6.93852
									210.8	-16.4794	-16.3621	-16.0779	-15.0862	-14.2598	-12.0728	-9.55418	-6.97638
									210.7	-16.5295	-16.3777	-16.0639	-15.0937	-14.2781	-12.1042	-9.57062	-6.99528
									210.6	-16.5073	-16.3851	-16.0414	-15.0641	-14.2824	-12.1256	-9.60539	-7.07785
									210.5	-16.486	-16.3403	-15.9877	-15.0528	-14.2534	-12.1633	-9.62397	-7.20708
									210.4	-16.4162	-16.3121	-15.9191	-15.0681	-14.2493	-12.1919	-9.62181	-7.18426
									210.3	-16.417	-16.2822	-15.8867	-15.0782	-14.2931	-12.0954	-9.67337	-7.17932
									210.2	-16.4145	-16.2901	-15.86	-15.1402	-14.308	-12.0533	-9.6351	-7.11514
									210.1	-16.3947	-16.2828	-15.8779	-15.139	-14.2734	-12.053	-9.651	-7.16971
									210	-16.3671	-16.3241	-15.8857	-15.1636	-14.2747	-12.0201	-9.70875	-7.16234
									209.9	-16.427	-16.3019	-15.8674	-15.1683	-14.2482	-12.1091	-9.69754	-7.22961
									209.8	-16.3967	-16.3252	-15.8669	-15.1436	-14.2931	-12.095	-9.76679	-7.25381
									209.7	-16.337	-16.318	-15.8591	-15.1494	-14.2958	-12.0298	-9.83275	-7.30262
									209.6	-16.3081	-16.2921	-15.8454	-15.1802	-14.3004	-11.9806	-9.81344	-7.33387
									209.5	-16.2632	-16.2531	-15.7362	-15.1553	-14.2659	-11.9702	-9.86117	-7.34471
									209.4	-16.1971	-16.1776	-15.6902	-15.1241	-14.2237	-11.9609	-9.86393	-7.31501
									209.3	-16.1221	-16.093	-15.6669	-15.0279	-14.2575	-12.0124	-9.88745	-7.24179
									209.2	-16.0653	-16.0898	-15.6257	-15.0153	-14.2849	-12.066	-9.91515	-7.25115
									209.1	-16.0479	-16.0761	-15.553	-14.9875	-14.2285	-12.0539	-9.9251	-7.37512
									209	-15.9866	-16.0233	-15.5152	-14.9249	-14.2712	-12.0774	-9.92995	-7.36387
									208.9	-15.9268	-15.9897	-15.4469	-14.9263	-14.214	-12.0841	-9.94402	-7.40939
									208.8	-15.8826	-15.9394	-15.4281	-14.9621	-14.1973	-12.0421	-9.97992	-7.39008
									208.7	-15.7934	-15.8909	-15.3895	-14.9692	-14.1584	-12.0803	-9.96597	-7.48939
									208.6	-15.7568	-15.8639	-15.3589	-14.9069	-14.16	-12.0986	-9.98486	-7.52481
									208.5	-15.7466	-15.8383	-15.2723	-14.8296	-14.1331	-12.0737	-9.98232	-7.53654
									208.4	-15.6755	-15.784	-15.2606	-14.7743	-14.1326	-12.0531	-9.95745	-7.44616
									208.3	-15.6656	-15.7106	-15.1698	-14.699	-14.0748	-12.0093	-10.0676	-7.49634
									208.2	-15.5992	-15.625	-15.1082	-14.5338	-14.0018	-12.1043	-10.0484	-7.59551
									208.1	-15.4938	-15.5849	-15.0935	-14.5301	-13.9611	-12.135	-10.0846	-7.62978
									208	-15.3957	-15.4925	-15.019	-14.5076	-13.9952	-12.0431	-9.99657	-7.59584
									207.9	-15.3484	-15.3985	-14.9856	-14.3801	-13.9666	-11.9586	-9.97067	-7.5918
									207.8	-15.2792	-15.3147	-14.9166	-14.3442	-13.8919	-11.8328	-10.0427	-7.68538
									207.7	-15.1801	-15.2422	-14.8947	-14.2727	-13.8035	-11.8153	-10.0824	-7.60642
									207.6	-15.1259	-15.1496	-14.8663	-14.1737	-13.7521	-11.8539	-10.06	-7.66896
									207.5	-15.077	-15.0141	-14.8234	-14.1049	-13.7258	-11.7698	-10.1148	-7.70658
									207.4	-15.0234	-14.9653	-14.6765	-13.9652	-13.5729	-11.7741	-10.0825	-7.71916
									207.3	-14.9993	-14.8313	-14.5188	-13.851	-13.5401	-11.7275	-10.0783	-7.71793
									207.2	-14.8314	-14.7111	-14.4572	-13.7912	-13.4425	-11.6894	-9.98566	-7.62253
									207.1	-14.7172	-14.5753	-14.3957	-13.686	-13.2903	-11.6796	-9.91131	-7.67571
									207	-14.6242	-14.4727	-14.2245	-13.5531	-13.3299	-11.689	-9.87804	-7.5818
									206.9	-14.5192	-14.4077	-14.0935	-13.402	-13.2619	-11.5697	-9.96399	-7.4279
									206.8	-14.3667	-14.3038	-13.886	-13.313	-13.1734	-11.4737	-9.9344	-7.46478
									206.7	-14.2923	-14.1628	-13.814	-13.1442	-13.0629	-11.3368	-9.86778	-7.44218
									206.6	-14.2395	-14.0745	-13.6915	-13.0828	-12.9556	-11.2523	-9.90716	-7.42487
									206.5	-14.1349	-13.9402	-13.5669	-12.9958	-12.8026	-11.08	-9.74005	-7.55292
									206.4	-14.0073	-13.8357	-13.4087	-12.9399	-12.7491	-10.8622	-9.78576	-7.61808
									206.3	-13.8997	-13.6219	-13.2563	-12.7424	-12.7268	-10.8493	-9.67414	-7.66883
									206.2	-13.7725	-13.5336	-13.1498	-12.6927	-12.6154	-10.7786	-9.66382	-7.71805
									206.1	-13.5577	-13.332	-12.9805	-12.6702	-12.4047	-10.6778	-9.59475	-7.75953
									206	-13.3792	-13.1405	-12.6469	-12.5926	-12.1646	-10.4473	-9.53467	-7.67157
									205.9	-13.1284	-12.9183	-12.4003	-12.3639	-11.8904	-10.3753	-9.51674	-7.58425
									205.8	-12.9607	-12.72	-12.1139	-12.1085	-11.6635	-10.2104	-9.45481	-7.65827
									205.7	-12.724	-12.5559	-12.0117	-11.9062	-11.4954	-10.1028	-9.31847	-7.89358
									205.6	-12.4759	-12.3776	-11.7694	-11.7441	-11.3231	-9.81059	-9.29334	-8.12219
									205.5	-12.2471	-12.1772	-11.5038	-11.406	-11.1211	-9.61175	-9.31067	-8.37863
									205.4	-12.0775	-12.0037	-11.2719	-11.2572	-10.9974	-9.49898	-9.15171	-8.47442
									205.3	-11.8301	-11.7705	-11.0471	-10.987	-10.7622	-9.22201	-8.9447	-8.37488
									205.2	-11.6427	-11.5391	-10.878	-10.8259	-10.5181	-8.99544	-8.78257	-8.36986
									205.1	-11.5269	-11.3515	-10.6742	-10.7192	-10.4634	-8.76983	-8.74954	-8.74674
									205	-11.3046	-11.174	-10.3816	-10.5408	-10.2843	-8.61258	-8.88063	-8.75345
									204.9	-11.1174	-10.9632	-10.1988	-10.3504	-10.0764	-8.52459	-8.92223	-8.76191
									204.8	-10.929	-10.8135	-10.1078	-10.1902	-9.81971	-8.34234	-8.81099	-8.58371
									204.7	-10.6726	-10.5478	-9.89441	-9.96375	-9.5995	-8.12204	-8.52481	-7.83579
									204.6	-10.5109	-10.3658	-9.68264	-9.74764	-9.48797	-8.12258	-8.41375	-7.77312
									204.5	-10.3233	-10.1241	-9.52308	-9.51313	-9.33508	-8.05791	-8.39908	-7.89126
									204.4	-10.0808	-9.87482	-9.34938	-9.26929	-9.17472	-7.8257	-8.07299	-8.20333
									204.3	-9.79691	-9.63146	-9.16731	-9.14555	-8.95507	-7.57017	-7.86073	-7.92125
									204.2	-9.64088	-9.42146	-8.98145	-8.93654	-8.76766	-7.41334	-7.69526	-7.57178
									204.1	-9.35313	-9.15704	-8.59773	-8.72653	-8.27804	-7.18053	-7.01002	-7.16377
									204	-9.12042	-8.88801	-8.39188	-8.47341	-8.15369	-7.06045	-7.27854	-7.19367
									203.9	-8.78499	-8.66893	-8.10061	-8.33008	-7.84789	-6.75742	-7.05203	-7.31183
									203.8	-8.50162	-8.32376	-7.8787	-8.05523	-7.4554	-6.61396	-6.47886	-7.78033
									203.7	-8.20146	-7.97896	-7.52183	-7.75603	-7.0949	-6.40397	-6.63355	-7.15115
									203.6	-8.03109	-7.75657	-7.22186	-7.47946	-6.70049	-6.429	-6.66253	-6.92852
									203.5	-7.75317	-7.5443	-7.00264	-7.19968	-6.4768	-6.19906	-5.95962	-6.40246
									203.4	-7.43973	-7.17869	-6.70064	-6.86011	-6.22359	-6.11828	-6.18588	-6.23557
									203.3	-7.03322	-6.73988	-6.44332	-6.35245	-5.69973	-6.43962	-5.51463	-5.7261
									203.2	-6.77489	-6.42214	-6.1005	-6.08532	-5.33137	-5.8388	-5.12418	-6.17517
									203.1	-6.42845	-6.08369	-5.80745	-5.81026	-5.11114	-5.64794	-5.94754	-5.78341
									203	-6.10256	-5.68801	-5.46143	-5.61772	-4.79436	-5.53252	-5.95932	-6.07383
									202.9	-5.69047	-5.30082	-5.19528	-5.44742	-4.40376	-5.11008	-5.4322	-4.3155
									202.8	-5.48717	-5.01911	-4.94119	-5.13713	-4.23609	-5.01718	-5.4913	-3.54803
									202.7	-5.17963	-4.6702	-4.57977	-4.73003	-4.12913	-4.40858	-4.6077	-3.9153
									202.6	-4.75561	-4.22818	-4.22152	-4.40755	-4.18477	-5.37365	-4.54901	-3.02119
									202.5	-4.30773	-3.85569	-3.99899	-4.20914	-4.06344	-5.019	-3.81696	-3.15754
									202.4	-3.88965	-3.37618	-3.57827	-3.93611	-3.83859	-5.20305	-3.12671	-1.95988
									202.3	-3.38566	-2.96287	-3.29815	-3.54722	-3.65934	-5.403	-3.66605	-3.32073
									202.2	-2.91859	-2.41452	-2.93776	-3.33597	-2.89415	-5.30769	-3.16108	-2.97387
									202.1	-2.52858	-2.15705	-2.44606	-2.85887	-2.66648	-5.18191	-2.87	-2.01247
									202	-2.25818	-1.80024	-2.03458	-2.63391	-2.88042	-4.35642	-2.31858	-2.75058
									201.9	-1.88524	-1.36869	-1.61174	-2.30844	-2.69069	-3.65123	-2.55224	-1.85903
									201.8	-1.51406	-1.03535	-1.18852	-1.80867	-2.25479	-3.25094	-1.70992	-0.983646
									201.7	-0.944243	-0.58893	-0.671774	-1.52584	-1.82579	-3.50914	-2.17671	0.04515
									201.6	-0.707142	-0.0841312	-0.30019	-0.95887	-1.30368	-3.02487	-2.74871	1.11084
									201.5	-0.307949	0.239144	0.00742824	-0.554471	-1.58798	-2.90501	-3.59022	1.37268
									201.4	0.320315	0.707467	0.481049	-0.123384	-0.84423	-3.01545	-2.87311	2.44769
									201.3	0.536085	1.13435	1.01939	0.141405	-0.331132	-3.37926	-3.26594	2.68038
									201.2	1.00844	1.34972	1.37735	0.636972	-0.0369858	-3.93019	-2.15272	2.74165
									201.1	1.58236	1.77277	2.12066	1.09914	-0.0694736	-3.96227	-2.32667	2.18417
									201	1.9673	2.1308	2.43047	1.44906	-0.255584	-3.8376	-1.5313	3.34412
									200.9	2.30246	2.56212	2.96412	1.15194	-0.117046	-4.19755	-1.245	3.51475
									200.8	2.86202	3.13272	3.52602	1.78676	0.0305391	-3.35025	-1.48294	4.1423
									200.7	3.20374	3.48517	4.04606	2.29878	-0.400709	-2.921	-0.310351	5.51353
									200.6	3.68052	4.1013	4.48206	3.25884	0.460848	-3.28429	1.53662	4.17421
									200.5	4.48029	4.7513	4.7906	3.20513	-1.9245	-2.85912	1.8617	3.21903
									200.4	5.06347	5.27833	4.81857	2.65034	-1.54057	-2.8338	1.14656	3.46614
									200.3	5.63772	5.74742	4.85675	2.92415	-1.27198	-0.980821	1.60002	3.78343
									200.2	5.99128	5.76237	5.19553	2.80285	-0.689684	-0.151451	1.82044	3.68975
									200.1	6.61709	6.14036	5.09322	2.33482	-1.00179	-0.490792	2.24273	5.15951
									200	7.04285	6.37156	5.69923	2.10871	-1.26055	-0.298699	2.26973	5.32267
									199.9	7.45093	6.48061	6.04327	2.28151	-1.7783	0.182393	1.23834	5.55668
									199.8	7.89912	6.94746	6.71514	2.63027	-0.472327	0.731726	2.32214	5.87361
									199.7	8.50413	7.27373	6.58311	3.56572	0.427524	-0.00751504	2.67394	5.53334
									199.6	8.97223	7.50109	8.44297	3.99648	-0.858502	1.242	2.86894	5.38422
									199.5	9.54325	7.92137	8.73589	4.4382	-0.780782	0.698728	2.84243	6.07195
									199.4	9.89109	8.34627	8.40438	4.4923	-0.733137	0.394203	2.62166	6.01172
									199.3	10.6386	8.29608	8.78246	4.5959	-0.172507	0.531001	2.85225	6.74963
									199.2	11.1487	8.85856	9.74124	5.25112	0.491151	1.06548	2.84609	7.39381
									199.1	11.5898	9.42959	10.684	5.59575	-0.0673144	2.58088	4.05127	8.80012
									199	12.0997	9.71815	10.9978	5.5658	-0.804885	2.97039	4.72039	8.80701
									198.9	12.4671	10.133	11.5464	5.30817	-1.02653	3.31459	4.05745	10.664
									198.8	12.8485	10.2881	10.6731	6.15336	-2.07288	3.20263	4.40557	11.4099
									198.7	13.8488	10.3311	9.93145	7.02163	-2.38791	4.42848	4.67012	11.2635
									198.6	14.2501	10.3201	11.0172	7.85513	-2.47119	4.73922	4.38848	11.6156
									198.5	14.435	10.9778	10.7466	7.07852	-2.81887	4.33484	3.64653	11.5938
									198.4	14.8741	10.4415	11.0479	7.84073	-2.96746	4.28794	4.76015	11.2219
									198.3	15.2732	11.7101	11.7204	7.05087	-1.52883	4.85774	5.33441	11.5858
									198.2	16.5774	11.2534	12.5457	7.85606	-1.81006	4.68728	5.82976	11.9726
									198.1	17.2588	11.0186	12.1073	8.48873	-1.72549	4.96391	5.32514	13.2077
									198	17.4365	9.96568	12.4786	9.00006	-1.93495	4.93765	6.19373	12.7958
									197.9	18.1298	10.4717	13.2886	9.2115	-3.05479	5.03742	5.9981	13.2576
									197.8	17.5289	9.86682	12.2326	9.85178	-3.48394	6.23805	6.47776	13.9562
									197.7	18.9373	8.52799	12.0303	9.93361	-3.11843	5.52858	7.76675	13.036
									197.6	18.9364	8.46058	11.388	10.1654	-2.86758	4.80722	7.47678	13.5163
									197.5	19.828	9.39126	12.0257	9.98307	-1.74681	4.52257	6.53081	14.4836
									197.4	20.3848	10.0382	12.2679	10.1562	-2.97281	4.96472	7.28278	13.645
									197.3	19.9596	10.0963	12.8473	10.5385	-2.27729	5.70779	7.5018	12.992
									197.2	20.4222	9.78271	13.4607	9.51928	-1.32895	4.42423	7.14196	12.7298
									197.1	20.84	8.99179	13.0121	9.37833	-1.15498	4.73928	7.81729	12.7044
									197	21.1458	7.74593	12.7987	8.73328	-1.6777	5.77878	7.56173	12.7663
									196.9	21.1019	8.13689	13.8935	9.87759	-1.8102	4.87902	8.55098	11.7642
									196.8	21.1696	9.69224	14.2312	11.0079	-0.477812	5.00489	8.07342	11.5712
									196.7	21.7889	10.6418	13.4552	11.2035	-1.26001	5.17124	8.65798	11.3063
									196.6	22.2397	10.1203	13.3016	10.9367	-2.35646	5.19949	9.44501	11.273
									196.5	21.968	10.6339	13.4328	11.8794	-2.09606	5.34766	10.179	9.63853
									196.4	22.8954	11.2624	14.1604	11.08	-2.13989	4.79298	9.58624	9.81432
									196.3	23.4841	11.4425	14.4914	9.27364	-2.61235	4.8528	8.70199	10.4893
									196.2	24.3295	12.1994	14.5935	9.16157	-2.26941	2.63444	8.06927	10.9108
									196.1	23.4701	13.1072	14.9803	9.34662	-1.65365	1.63421	8.56476	12.2175
									196	24.0928	13.2908	14.2121	9.53973	-1.69663	1.58215	9.26879	12.5499
									195.9	24.9827	14.0779	14.9578	9.68428	-2.19426	1.81514	9.80158	10.4989
									195.8	25.1031	13.5981	15.3003	10.9673	-1.7577	2.24555	9.67063	9.08382
									195.7	25.3657	14.4945	15.2193	10.8173	-2.26622	2.18263	8.65475	9.24584
									195.6	23.5468	13.5932	15.5133	9.46194	-0.0390311	2.0406	8.37463	8.73357
									195.5	23.6319	13.8001	15.0164	9.03362	0.0306342	1.6318	9.09472	10.2461
									195.4	22.9634	12.107	15.1804	9.58202	0.441665	2.99512	9.91272	9.86801
									195.3	21.6212	11.6996	14.5493	9.44456	0.061464	4.96748	10.1399	11.3254
									195.2	22.0426	12.1572	14.7452	9.07629	-1.04399	5.75102	11.6518	9.19288
									195.1	22.2774	12.1834	14.1512	10.528	-0.330225	5.3342	10.6484	10.6207
									195	19.612	12.745	14.1502	10.7737	-0.0884625	5.1728	9.40772	9.22047

## Sheet: M-CDP04 (aMCL1)
Notes:
For the GuHCl melt, five scans were performed per sample; averages below
Guanidinium melt
[GuHCl]	% folded (average)	StdDev %
0	100	2.4442
0.5	98.5797	1.96763
1	101.562	2.08559
1.5	95.2956	1.86854
2	96.5602	1.84967
2.5	95.0597	2.40645
3	95.6495	2.40174
3.5	76.2374	2.51026
4	25.2914	1.99122
4.5	11.4896	2.52442
5	8.13476	3.28882
5.5	6.27094	2.94909
6	7.96489	2.59048

## Sheet: F-CDP01
Notes:
For the GuHCl melt, five scans were performed per sample; averages below
Guanidinium melt
[GuHCl]	% folded (average)	StdDev %
0	100	2.64007
0.5	106.195	2.77501
1	105.732	2.45233
1.5	106.976	2.75741
2	104.834	2.59314
2.5	104.999	2.62247
3	104.476	3.20329
3.5	94.2857	3.33236
4	44.9516	2.92168
4.5	9.65092	3.16808
5	6.3127	2.3878
5.5	2.39366	3.26782
6	2.29979	2.87474

## Sheet: B-CDP01
Notes:
For the GuHCl melt, five scans were performed per sample; averages below
Guanidinium melt
[GuHCl]	mdeg (222 nm)	% folded
0	100	2.59249
0.5	104.757	2.0444
1	101.562	3.14059
1.5	98.8216	2.80077
2	85.892	3.07482
2.5	68.6654	2.75144
3	61.6552	3.09126
3.5	52.6555	1.96218
4	44.034	4.03946
4.5	24.593	2.93231
5	6.97725	2.735
5.5	4.85612	3.31598
6	1.90189	2.95423

## Sheet: aBCL2
Notes:
For the GuHCl melt, three scans were performed per sample.
Temperature scans were performed once per construct.
Guanidinium melt						Temperature melt			Wavelength scans at temps
[GuHCl]	mdeg (222 nm)	% folded	Average %	StdDev %		Temperature	mdeg (222 nm)			mdeg (222 nm)
0	-23.2628	100.048	100	0.844414		19.91	-23.7503		Wavelength	20°C	30°C	40°C	50°C	60°C	70°C	80°C	90°C
0	-23.0499	99.1325				22.11	-23.5488		260	0.336764	0.214406	0.214691	0.348385	0.483913	0.0989529	0.246917	-0.0479012
0	-23.4421	100.819				24.03	-23.5596		259.9	0.325803	0.233487	0.210637	0.407245	0.502445	0.0638803	0.252411	-0.0929275
0.5	-23.6296	101.626	100.315	1.20355		26.05	-23.5586		259.8	0.298336	0.197427	0.235447	0.408328	0.49504	0.0282858	0.267666	-0.0578695
0.5	-23.2652	100.058				28.08	-23.7846		259.7	0.30834	0.221602	0.213757	0.427093	0.484872	0.0768325	0.251064	-0.0892921
0.5	-23.0795	99.2598				30.07	-23.1426		259.6	0.316072	0.230476	0.19819	0.457093	0.470509	0.113536	0.287995	-0.0978211
1	-24.1307	103.781	103.924	0.677849		32.07	-23.5964		259.5	0.271672	0.224741	0.216246	0.462457	0.475107	0.0573539	0.268491	-0.0933704
1	-24.0257	103.329				34.04	-23.387		259.4	0.174284	0.238371	0.233176	0.451257	0.468906	0.072556	0.287412	-0.0648532
1	-24.3356	104.662				36.05	-22.8181		259.3	0.159078	0.210561	0.219276	0.490177	0.446109	0.0694513	0.317772	-0.0744022
1.5	-24.0778	103.553	103.535	0.144322		38.09	-22.7256		259.2	0.140436	0.247538	0.23976	0.503002	0.440491	0.0190646	0.29828	-0.0866939
1.5	-24.1047	103.669				40.1	-22.7802		259.1	0.132926	0.274143	0.270522	0.48476	0.452722	0.00799269	0.228981	-0.0558758
1.5	-24.038	103.382				42.04	-22.7096		259	0.148115	0.323885	0.26205	0.470496	0.421335	0.040847	0.19821	-0.0521553
2	-22.971	98.7932	99.2487	0.509667		44.03	-22.4905		258.9	0.138626	0.328869	0.287745	0.492102	0.441134	0.0680051	0.186785	-0.0418524
2	-23.2049	99.7992				46.06	-22.8532		258.8	0.163962	0.301376	0.300765	0.454033	0.46954	0.0596702	0.227187	-0.0121783
2	-23.0548	99.1536				48.07	-21.9064		258.7	0.169931	0.243495	0.301114	0.46445	0.470331	0.0932802	0.191343	-0.0651625
2.5	-20.5973	88.5844	87.877	0.769766		50.04	-21.9283		258.6	0.159688	0.222053	0.28495	0.469606	0.479263	0.117036	0.205123	-0.0230173
2.5	-20.2422	87.0572				52.06	-21.8592		258.5	0.127486	0.237964	0.315908	0.469918	0.460979	0.1249	0.165943	0.0183296
2.5	-20.4589	87.9892				54.03	-22.248		258.4	0.10923	0.213001	0.294084	0.500482	0.432809	0.101772	0.216501	0.0483852
3	-12.0866	51.9818	50.7767	1.28395		56.09	-21.7132		258.3	0.147889	0.200709	0.293381	0.51118	0.443036	0.10788	0.208831	0.0435066
3	-11.4924	49.4263				58.05	-21.1544		258.2	0.177202	0.201453	0.281158	0.532099	0.446873	0.0833834	0.193037	0.0655196
3	-11.8402	50.9221				60.08	-21.1959		258.1	0.20621	0.216089	0.279468	0.517634	0.465614	0.105629	0.215103	0.0273952
3.5	-4.70714	20.2444	19.7241	0.805857		62.06	-21.1438		258	0.215919	0.22034	0.277009	0.452182	0.422611	0.0661064	0.207289	0.0324002
3.5	-4.37034	18.7959				64.07	-20.9987		257.9	0.19659	0.244814	0.298976	0.487072	0.432269	0.0436857	0.235612	0.0316734
3.5	-4.68105	20.1322				66.06	-20.5446		257.8	0.171826	0.254092	0.285276	0.494155	0.425487	0.0534635	0.270875	0.0309324
4	-1.98175	8.52307	8.70311	0.297549		68.08	-20.417		257.7	0.189212	0.2665	0.299965	0.477811	0.406957	0.00941975	0.273934	-0.0147236
4	-2.10347	9.04656				70.1	-20.2448		257.6	0.200637	0.256181	0.311981	0.512474	0.417444	0.0198349	0.311528	0.00266244
4	-1.98562	8.53971				72.03	-19.6975		257.5	0.171577	0.259206	0.352846	0.523061	0.441994	-0.0226169	0.348945	-0.000362315
4.5	-0.857658	3.6886	3.42876	0.324272		74.07	-19.8174		257.4	0.190927	0.256094	0.364137	0.509336	0.448113	-0.0736786	0.339384	-0.0314793
4.5	-0.712745	3.06536				76.03	-19.1579		257.3	0.192871	0.245844	0.358397	0.54298	0.427726	-0.085344	0.342388	-0.0352356
4.5	-0.821325	3.53234				78.04	-18.6103		257.2	0.234307	0.245015	0.387021	0.528667	0.39425	-0.0471554	0.329754	-0.0319334
5	-0.783096	3.36792	2.34974	1.0144		80.07	-17.7322		257.1	0.267007	0.264854	0.374807	0.509361	0.373862	-0.00475054	0.323217	-0.0100627
5	-0.311377	1.33916				82.02	-17.2211		257	0.276116	0.259855	0.321071	0.492203	0.386638	-0.0126657	0.326444	0.00970738
5	-0.544581	2.34212				84.11	-15.5693		256.9	0.311299	0.242753	0.334057	0.510799	0.381956	-0.0559582	0.303911	-0.0263535
5.5	-0.381636	1.64133	0.784518	0.806427		86.07	-14.9301		256.8	0.304242	0.216104	0.313619	0.52257	0.374743	-0.0506697	0.289544	-0.0717461
5.5	-0.00937382	0.0403147				88.03	-13.5228		256.7	0.294536	0.243807	0.350229	0.463805	0.357116	0.0142665	0.302212	-0.0429432
5.5	-0.156229	0.671906				90.06	-12.4509		256.6	0.276385	0.239355	0.34051	0.419109	0.331768	0.0451757	0.355024	-0.0563507
6	0.102751	-0.441909	-0.289811	1.558		92.02	-11.4617		256.5	0.320345	0.285575	0.327423	0.378229	0.33488	0.0420964	0.340347	-0.0604094
6	0.410665	-1.76618				94.08	-10.0262		256.4	0.301258	0.236513	0.327138	0.376532	0.299155	0.0567634	0.362612	-0.10442
6	-0.311259	1.33866				96.12	-9.62278		256.3	0.343301	0.234602	0.284792	0.384606	0.297578	0.0601068	0.355883	-0.120765
									256.2	0.3068	0.17322	0.286849	0.404773	0.320884	0.0862906	0.366059	-0.127347
									256.1	0.324982	0.142795	0.314538	0.39405	0.321452	0.0774793	0.381714	-0.123503
									256	0.332149	0.151281	0.348022	0.39596	0.335053	0.116745	0.370629	-0.0904692
									255.9	0.332712	0.154127	0.355472	0.319963	0.329186	0.0855195	0.363763	-0.107403
									255.8	0.327837	0.129575	0.361657	0.286188	0.337529	0.108273	0.337895	-0.13501
									255.7	0.320975	0.133036	0.368307	0.299439	0.338296	0.140185	0.326142	-0.12979
									255.6	0.32526	0.0840295	0.372107	0.312912	0.324755	0.16568	0.298648	-0.129976
									255.5	0.295394	0.0890878	0.393195	0.32163	0.299731	0.189455	0.284708	-0.118719
									255.4	0.278865	0.0757149	0.388478	0.314357	0.30381	0.21522	0.286102	-0.11713
									255.3	0.298363	0.0942777	0.394228	0.332928	0.258859	0.253954	0.281665	-0.0899734
									255.2	0.317304	0.0550808	0.426942	0.306381	0.248833	0.206853	0.292787	-0.0791513
									255.1	0.309489	0.0781382	0.461323	0.314999	0.252982	0.203028	0.324691	-0.0896514
									255	0.341693	0.0822636	0.454164	0.308389	0.254975	0.232934	0.31326	-0.126903
									254.9	0.359412	0.075293	0.462127	0.303057	0.301102	0.188613	0.3338	-0.144125
									254.8	0.350457	0.0688859	0.461799	0.321688	0.291876	0.184642	0.330161	-0.117139
									254.7	0.312408	0.0601446	0.438228	0.352777	0.251093	0.212058	0.295761	-0.124707
									254.6	0.251259	0.0649189	0.393271	0.343043	0.244659	0.177356	0.27461	-0.120434
									254.5	0.223334	0.0803282	0.377897	0.357462	0.230821	0.189492	0.285098	-0.101835
									254.4	0.224689	0.127185	0.425684	0.306921	0.290971	0.18864	0.269306	-0.117217
									254.3	0.202335	0.154002	0.394691	0.260266	0.285059	0.155498	0.238203	-0.115072
									254.2	0.212504	0.147585	0.366396	0.262289	0.277233	0.170391	0.24857	-0.149577
									254.1	0.166023	0.148596	0.346443	0.268006	0.254203	0.176902	0.205177	-0.142822
									254	0.169592	0.124832	0.342157	0.255741	0.284816	0.147425	0.230977	-0.156312
									253.9	0.151152	0.143115	0.342543	0.235477	0.295187	0.154401	0.246601	-0.132581
									253.8	0.1398	0.146817	0.326465	0.245822	0.2887	0.15536	0.234087	-0.144348
									253.7	0.137283	0.110023	0.30501	0.244049	0.304662	0.184002	0.278244	-0.121973
									253.6	0.102637	0.122248	0.310603	0.249069	0.31333	0.217322	0.277515	-0.163893
									253.5	0.142927	0.123977	0.323033	0.237256	0.283152	0.230199	0.277324	-0.13181
									253.4	0.0899447	0.120766	0.3315	0.254647	0.271703	0.205941	0.258177	-0.121293
									253.3	0.0859479	0.090736	0.358883	0.272208	0.291309	0.203221	0.257251	-0.126663
									253.2	0.0828991	0.12434	0.313739	0.268778	0.286369	0.204421	0.211901	-0.172327
									253.1	0.0513361	0.15106	0.332376	0.233704	0.252771	0.191977	0.199858	-0.160098
									253	0.0245816	0.173749	0.338717	0.192875	0.216597	0.170472	0.189083	-0.156031
									252.9	-0.00960781	0.181612	0.37162	0.178211	0.225146	0.171397	0.209438	-0.177993
									252.8	-0.0185662	0.192227	0.385101	0.152578	0.14778	0.190949	0.254194	-0.107632
									252.7	-0.0297997	0.171857	0.391945	0.132781	0.139991	0.186445	0.267457	-0.084468
									252.6	0.0134445	0.162745	0.383732	0.172095	0.13365	0.187351	0.226759	-0.0960277
									252.5	0.00437071	0.154067	0.37256	0.157022	0.10975	0.158601	0.217373	-0.0851907
									252.4	0.0246604	0.156697	0.369337	0.153278	0.0647467	0.140355	0.21362	-0.0987404
									252.3	0.0137808	0.147196	0.39792	0.186564	0.0938598	0.13338	0.20502	-0.0811168
									252.2	0.0303887	0.114493	0.386684	0.185841	0.0532446	0.113303	0.202557	-0.0679443
									252.1	0.04953	0.0956081	0.372266	0.184526	0.0539137	0.114089	0.18346	-0.0714743
									252	0.0304383	0.0834822	0.395582	0.197421	0.0381052	0.124414	0.145903	-0.080332
									251.9	0.0810175	0.0814379	0.420734	0.205398	0.058505	0.118851	0.183736	-0.0673004
									251.8	0.0793128	0.0740527	0.379436	0.237178	0.0715626	0.136497	0.188009	-0.0476998
									251.7	0.0945044	0.109221	0.361342	0.165273	0.00807	0.160962	0.167122	-0.0702469
									251.6	0.105819	0.121398	0.333018	0.16527	0.0086847	0.139052	0.13008	-0.0871823
									251.5	0.0989025	0.0989513	0.355187	0.149358	-0.0386147	0.110139	0.181826	-0.0912297
									251.4	0.115671	0.075228	0.368832	0.110571	-0.0430384	0.0808923	0.143686	-0.0784105
									251.3	0.12356	0.0853097	0.330562	0.108435	-0.0254407	0.120278	0.176961	-0.122344
									251.2	0.176035	0.0637346	0.365277	0.0819554	-0.0523882	0.0935195	0.172293	-0.12964
									251.1	0.189376	0.0802832	0.382428	0.0790222	-0.0603268	0.0717634	0.206831	-0.139688
									251	0.200404	0.0174669	0.35606	0.0658628	-0.0377498	0.083081	0.239502	-0.139775
									250.9	0.157086	0.0207914	0.338471	0.11088	-0.0537476	0.0681657	0.264998	-0.163542
									250.8	0.128353	-0.00849621	0.346751	0.106921	-0.00112296	0.0623825	0.255088	-0.206372
									250.7	0.169821	0.00762057	0.313875	0.0673807	-0.0521539	0.0401679	0.317938	-0.198954
									250.6	0.127809	0.0142257	0.324107	0.102722	-0.0933643	0.0213684	0.302371	-0.194055
									250.5	0.0776427	0.0390631	0.322945	0.0951445	-0.110264	-0.00773726	0.323683	-0.167398
									250.4	0.110998	0.050527	0.355198	0.0792161	-0.159096	0.0107436	0.348701	-0.245936
									250.3	0.115267	0.0539888	0.350975	0.0533301	-0.143383	0.0179117	0.358255	-0.245226
									250.2	0.155394	0.0690043	0.323927	0.0409698	-0.120724	0.00993275	0.302989	-0.284718
									250.1	0.1444	0.102963	0.335728	0.0487567	-0.16389	-0.00353988	0.304437	-0.242523
									250	0.146811	0.107309	0.376791	0.0550162	-0.175246	-0.0132014	0.2872	-0.282001
									249.9	0.163459	0.10968	0.37277	0.069415	-0.24632	-0.0372006	0.250909	-0.291638
									249.8	0.177223	0.12942	0.366769	0.044732	-0.242065	-0.0271968	0.233139	-0.284621
									249.7	0.146442	0.116204	0.385104	0.0103508	-0.261151	-0.0525267	0.173777	-0.258733
									249.6	0.152172	0.099816	0.361094	-0.00164185	-0.293856	-0.0672913	0.192138	-0.265706
									249.5	0.129793	0.0898715	0.336817	0.0148302	-0.282188	-0.0514841	0.199345	-0.268877
									249.4	0.126605	0.0878826	0.328461	0.0192677	-0.289848	-0.104001	0.148883	-0.316147
									249.3	0.152059	0.120001	0.294929	0.0208036	-0.335809	-0.101721	0.147103	-0.315462
									249.2	0.13752	0.0757435	0.267734	-0.00863461	-0.398421	-0.0930065	0.105088	-0.255018
									249.1	0.117958	0.0531481	0.261024	-0.00629905	-0.37387	-0.0681032	0.0900035	-0.24135
									249	0.0533095	0.0156752	0.241262	0.00988783	-0.359983	-0.123122	0.0866169	-0.290819
									248.9	0.0525027	-0.0208661	0.303751	-0.0458574	-0.329894	-0.108219	0.0658301	-0.351956
									248.8	0.0115259	-0.0357009	0.298618	-0.0320992	-0.312947	-0.103568	0.0631549	-0.374591
									248.7	-0.0295276	-0.00760457	0.312715	-0.0471888	-0.299853	-0.147001	0.0552101	-0.364448
									248.6	-0.0318477	-0.00406826	0.301626	-0.0327544	-0.303772	-0.134267	0.0392937	-0.38158
									248.5	-0.0134226	-0.0111171	0.238075	0.0133229	-0.302684	-0.167999	0.0221829	-0.36631
									248.4	-0.0718284	0.00100073	0.221907	-0.0120452	-0.263131	-0.205166	0.0548577	-0.330001
									248.3	-0.0477108	0.0210654	0.221041	-0.0165115	-0.2137	-0.225008	0.0293462	-0.351757
									248.2	-0.0802361	0.06993	0.218645	0.0194457	-0.207906	-0.241221	0.0316873	-0.34243
									248.1	-0.0822191	0.0812702	0.256218	0.020271	-0.209291	-0.286618	0.0273062	-0.383634
									248	-0.0507473	0.0491629	0.232071	0.00786816	-0.232923	-0.345619	0.00560069	-0.384849
									247.9	-0.0759346	0.0305544	0.20613	-0.00173183	-0.237357	-0.355174	-0.0327252	-0.375908
									247.8	-0.105818	-0.00272199	0.16495	-0.0426985	-0.261155	-0.361731	0.00616834	-0.444061
									247.7	-0.10566	-0.00531663	0.145016	-0.0348741	-0.221778	-0.373054	0.00794054	-0.478918
									247.6	-0.0829385	0.0188017	0.135727	-0.0539243	-0.24986	-0.36628	0.0468744	-0.492397
									247.5	-0.0949928	0.000951942	0.118048	-0.0612596	-0.277966	-0.376313	0.0246112	-0.546332
									247.4	-0.0976149	0.00888535	0.115221	-0.0824109	-0.274295	-0.386547	-0.00723586	-0.574993
									247.3	-0.110246	0.0201868	0.105566	-0.1048	-0.254132	-0.412508	0.00117777	-0.556218
									247.2	-0.0611376	0.035199	0.0886042	-0.127157	-0.241957	-0.450809	-0.0619667	-0.57653
									247.1	-0.130506	0.039091	0.055475	-0.15047	-0.287624	-0.521007	-0.0673916	-0.608058
									247	-0.146472	0.0202627	0.0254525	-0.164188	-0.30668	-0.500988	-0.100289	-0.629123
									246.9	-0.163348	0.0276892	-0.00984164	-0.19388	-0.33718	-0.509367	-0.145013	-0.625825
									246.8	-0.196717	0.001804	-0.0322258	-0.200833	-0.380577	-0.56846	-0.155862	-0.585613
									246.7	-0.249397	-0.00772552	-0.0474145	-0.219946	-0.392739	-0.537907	-0.189879	-0.592427
									246.6	-0.238099	0.0159103	-0.0414021	-0.259728	-0.364132	-0.531852	-0.209882	-0.608222
									246.5	-0.252344	0.0086362	-0.0498051	-0.274784	-0.387089	-0.527133	-0.184247	-0.61745
									246.4	-0.243019	-0.0240591	-0.0081604	-0.297481	-0.408022	-0.505676	-0.202819	-0.624315
									246.3	-0.245817	-0.0266297	-0.0352698	-0.322468	-0.377535	-0.52748	-0.211173	-0.628644
									246.2	-0.282434	-0.002231	-0.0934762	-0.301745	-0.425778	-0.562712	-0.149179	-0.669042
									246.1	-0.273117	0.0121446	-0.0887749	-0.276737	-0.460029	-0.532672	-0.163998	-0.679204
									246	-0.298373	0.0377661	-0.0866559	-0.256028	-0.486602	-0.559305	-0.168882	-0.679986
									245.9	-0.299036	-0.0203166	-0.098257	-0.336059	-0.455468	-0.557468	-0.139599	-0.670627
									245.8	-0.304209	-0.0109689	-0.0803086	-0.376923	-0.478432	-0.576552	-0.1763	-0.641285
									245.7	-0.301917	-0.00892797	-0.118489	-0.383563	-0.519311	-0.621985	-0.206888	-0.693559
									245.6	-0.315645	0.00323635	-0.125031	-0.410996	-0.542147	-0.658485	-0.211195	-0.716215
									245.5	-0.306272	-0.00681206	-0.125223	-0.414767	-0.572121	-0.685361	-0.207076	-0.759295
									245.4	-0.299012	-0.0152123	-0.119829	-0.456272	-0.618469	-0.739445	-0.195256	-0.761711
									245.3	-0.31199	-0.0212804	-0.104139	-0.471048	-0.630117	-0.777529	-0.236212	-0.76683
									245.2	-0.33347	-0.038034	-0.161978	-0.432938	-0.659485	-0.785464	-0.275777	-0.791385
									245.1	-0.329073	-0.088278	-0.182669	-0.485981	-0.682741	-0.771653	-0.352501	-0.830838
									245	-0.322154	-0.121374	-0.206961	-0.490496	-0.728544	-0.755882	-0.369558	-0.842179
									244.9	-0.364369	-0.156355	-0.217146	-0.497484	-0.710549	-0.784242	-0.368493	-0.835506
									244.8	-0.398905	-0.195774	-0.224868	-0.502537	-0.726446	-0.765758	-0.391009	-0.873766
									244.7	-0.380445	-0.260543	-0.270348	-0.511549	-0.762924	-0.776983	-0.381074	-0.898888
									244.6	-0.381647	-0.311774	-0.282826	-0.551041	-0.786626	-0.83799	-0.405051	-0.934064
									244.5	-0.407277	-0.342941	-0.325829	-0.554032	-0.79872	-0.851958	-0.519416	-1.00236
									244.4	-0.426338	-0.365243	-0.35569	-0.589947	-0.820385	-0.889268	-0.530408	-1.00885
									244.3	-0.50605	-0.372453	-0.331225	-0.689229	-0.825498	-0.870483	-0.522207	-1.0153
									244.2	-0.499343	-0.386188	-0.340351	-0.724255	-0.812731	-0.865218	-0.54847	-0.999401
									244.1	-0.501598	-0.408954	-0.386397	-0.771529	-0.804649	-0.882472	-0.617314	-0.964694
									244	-0.544226	-0.424516	-0.432529	-0.771071	-0.78604	-0.900598	-0.656313	-0.974835
									243.9	-0.59499	-0.413139	-0.48104	-0.810512	-0.835278	-0.930095	-0.703879	-0.99962
									243.8	-0.637103	-0.394784	-0.486168	-0.842107	-0.875092	-0.888989	-0.713099	-1.00359
									243.7	-0.67574	-0.419106	-0.515321	-0.864627	-0.90261	-0.965568	-0.771292	-1.03786
									243.6	-0.741689	-0.418218	-0.592301	-0.899758	-0.978573	-0.979637	-0.835788	-1.05306
									243.5	-0.777043	-0.410665	-0.594721	-0.972351	-0.996074	-1.0255	-0.919808	-1.06346
									243.4	-0.820945	-0.490074	-0.621147	-0.961615	-1.03501	-1.07164	-0.937714	-1.09944
									243.3	-0.836435	-0.529242	-0.656741	-0.986205	-1.12168	-1.08159	-0.936298	-1.13927
									243.2	-0.885857	-0.552423	-0.712626	-1.03091	-1.09382	-1.14967	-1.02585	-1.17219
									243.1	-0.915404	-0.582242	-0.767069	-1.04546	-1.07806	-1.14833	-1.01323	-1.19911
									243	-0.940606	-0.655136	-0.800486	-1.07142	-1.1217	-1.19786	-1.05038	-1.15896
									242.9	-0.984589	-0.685914	-0.877653	-1.07415	-1.14509	-1.22571	-1.05582	-1.17264
									242.8	-0.988588	-0.744205	-0.917643	-1.1163	-1.18885	-1.28495	-1.11989	-1.17576
									242.7	-1.0518	-0.750293	-0.948289	-1.10998	-1.213	-1.31914	-1.14402	-1.19396
									242.6	-1.02779	-0.825577	-0.999261	-1.1635	-1.25344	-1.35936	-1.15416	-1.20761
									242.5	-1.03568	-0.881121	-1.0379	-1.17846	-1.32291	-1.40533	-1.15689	-1.23782
									242.4	-1.05064	-0.950755	-1.04762	-1.18567	-1.34186	-1.42315	-1.22893	-1.26624
									242.3	-1.05864	-0.98496	-1.08108	-1.18979	-1.35467	-1.47116	-1.25787	-1.25121
									242.2	-1.0499	-1.01987	-1.10807	-1.24167	-1.38602	-1.53087	-1.35176	-1.24382
									242.1	-1.09351	-1.06873	-1.1834	-1.2708	-1.39566	-1.5823	-1.45034	-1.25396
									242	-1.10451	-1.14804	-1.19786	-1.29617	-1.46931	-1.57582	-1.4617	-1.29071
									241.9	-1.18773	-1.22701	-1.20173	-1.35557	-1.51398	-1.5806	-1.47212	-1.2755
									241.8	-1.20865	-1.28795	-1.28081	-1.41854	-1.60829	-1.61759	-1.51347	-1.30045
									241.7	-1.24042	-1.33308	-1.35285	-1.51586	-1.61515	-1.66089	-1.53082	-1.29382
									241.6	-1.29444	-1.33903	-1.40287	-1.56459	-1.62855	-1.67044	-1.5668	-1.32127
									241.5	-1.31056	-1.43009	-1.46289	-1.56681	-1.64294	-1.71518	-1.55175	-1.35532
									241.4	-1.38065	-1.51583	-1.53093	-1.56645	-1.70616	-1.74645	-1.5823	-1.38431
									241.3	-1.39736	-1.5814	-1.62679	-1.63146	-1.75726	-1.7866	-1.63326	-1.42203
									241.2	-1.4311	-1.67087	-1.72547	-1.68731	-1.7807	-1.87455	-1.72544	-1.4556
									241.1	-1.47093	-1.70842	-1.80377	-1.76295	-1.86973	-1.89406	-1.71295	-1.45407
									241	-1.51564	-1.76989	-1.8516	-1.839	-1.90181	-1.87208	-1.81051	-1.5085
									240.9	-1.55962	-1.81117	-1.87833	-1.89338	-1.94081	-1.9283	-1.85012	-1.57712
									240.8	-1.57438	-1.86618	-1.92704	-1.94068	-2.01073	-1.99061	-1.90823	-1.61735
									240.7	-1.64382	-1.86417	-2.00709	-2.02622	-2.11052	-2.06584	-1.96803	-1.62368
									240.6	-1.73408	-1.87018	-2.05986	-2.05294	-2.16881	-2.1398	-2	-1.60825
									240.5	-1.78772	-1.90725	-2.12	-2.15036	-2.24719	-2.23693	-2.08505	-1.67386
									240.4	-1.80246	-1.97652	-2.1651	-2.19178	-2.26271	-2.32177	-2.11965	-1.7562
									240.3	-1.85174	-2.11772	-2.2295	-2.26716	-2.35416	-2.40652	-2.20295	-1.80016
									240.2	-1.89573	-2.16295	-2.27083	-2.33542	-2.43134	-2.49552	-2.28179	-1.82209
									240.1	-1.89274	-2.25076	-2.30315	-2.38436	-2.52104	-2.55422	-2.33717	-1.90228
									240	-1.98696	-2.33034	-2.34963	-2.42228	-2.62525	-2.65108	-2.40526	-1.93298
									239.9	-2.04075	-2.40759	-2.44876	-2.51472	-2.71073	-2.70525	-2.50389	-1.97941
									239.8	-2.09581	-2.48948	-2.53916	-2.58741	-2.81652	-2.72181	-2.53245	-2.00531
									239.7	-2.1664	-2.51	-2.58438	-2.6429	-2.8537	-2.74685	-2.6195	-2.03064
									239.6	-2.26586	-2.57759	-2.64144	-2.70694	-2.92289	-2.81061	-2.66077	-2.05759
									239.5	-2.30757	-2.59758	-2.7346	-2.76351	-3.01286	-2.8535	-2.75491	-2.06603
									239.4	-2.39821	-2.67508	-2.81501	-2.82122	-3.13181	-2.94806	-2.84917	-2.06749
									239.3	-2.48243	-2.69009	-2.8865	-2.88953	-3.19497	-3.01017	-2.87406	-2.05779
									239.2	-2.55612	-2.79614	-2.95769	-2.93434	-3.25754	-3.11857	-2.99002	-2.08339
									239.1	-2.60362	-2.90014	-3.07054	-3.03371	-3.3388	-3.23582	-3.03868	-2.11797
									239	-2.64	-2.99347	-3.1204	-3.11558	-3.43453	-3.2837	-3.10311	-2.15301
									238.9	-2.73263	-3.08813	-3.20208	-3.21143	-3.51806	-3.32963	-3.17196	-2.22301
									238.8	-2.82006	-3.13373	-3.26278	-3.27057	-3.54819	-3.35684	-3.21459	-2.24417
									238.7	-2.90912	-3.25498	-3.35309	-3.36667	-3.59515	-3.39357	-3.283	-2.31681
									238.6	-2.99422	-3.34622	-3.39984	-3.44041	-3.67861	-3.47754	-3.34995	-2.3743
									238.5	-3.10366	-3.45419	-3.48642	-3.51097	-3.72498	-3.55214	-3.4089	-2.3947
									238.4	-3.18312	-3.51837	-3.5538	-3.61678	-3.81253	-3.5776	-3.46759	-2.4653
									238.3	-3.2475	-3.59461	-3.65368	-3.67883	-3.92733	-3.68777	-3.51826	-2.52175
									238.2	-3.33438	-3.70847	-3.72571	-3.76	-4.05964	-3.77419	-3.58491	-2.55292
									238.1	-3.38962	-3.82182	-3.83307	-3.86246	-4.139	-3.92262	-3.66825	-2.58975
									238	-3.45613	-3.88025	-3.93754	-3.93437	-4.211	-3.9841	-3.7283	-2.62932
									237.9	-3.53942	-3.96164	-4.02304	-4.00346	-4.33142	-4.05089	-3.8049	-2.67683
									237.8	-3.64807	-4.10818	-4.11807	-4.09278	-4.4111	-4.1477	-3.91386	-2.70558
									237.7	-3.7454	-4.23271	-4.23967	-4.19271	-4.47461	-4.2034	-3.99093	-2.74351
									237.6	-3.82803	-4.31594	-4.35202	-4.30722	-4.56861	-4.34851	-4.06053	-2.79555
									237.5	-3.94889	-4.37384	-4.46662	-4.4066	-4.68219	-4.4604	-4.19306	-2.87594
									237.4	-4.04059	-4.4182	-4.54266	-4.45787	-4.76037	-4.53267	-4.21433	-2.93648
									237.3	-4.13892	-4.51534	-4.68304	-4.55367	-4.87866	-4.61751	-4.28796	-3.00443
									237.2	-4.26061	-4.62323	-4.78881	-4.62555	-4.95772	-4.68413	-4.37577	-3.00926
									237.1	-4.35338	-4.70714	-4.84176	-4.73646	-5.01555	-4.7662	-4.45452	-3.06988
									237	-4.44857	-4.81222	-4.98588	-4.86377	-5.13226	-4.86468	-4.59494	-3.08469
									236.9	-4.55153	-4.91591	-5.08989	-4.97339	-5.25213	-4.97462	-4.66456	-3.15033
									236.8	-4.64858	-5.05662	-5.19325	-5.09758	-5.3636	-5.07272	-4.69471	-3.19553
									236.7	-4.76175	-5.14826	-5.27014	-5.22788	-5.42908	-5.19039	-4.75585	-3.28363
									236.6	-4.88501	-5.24165	-5.36468	-5.34348	-5.52513	-5.33056	-4.82839	-3.29508
									236.5	-4.95917	-5.33068	-5.45633	-5.41332	-5.61218	-5.45568	-4.93277	-3.31494
									236.4	-5.03162	-5.48153	-5.56777	-5.52059	-5.75071	-5.556	-5.03992	-3.41816
									236.3	-5.17797	-5.57353	-5.72276	-5.65922	-5.86648	-5.68393	-5.14671	-3.49241
									236.2	-5.26968	-5.65558	-5.82707	-5.76521	-5.95585	-5.75863	-5.22421	-3.5386
									236.1	-5.39573	-5.7445	-5.95067	-5.87071	-6.02447	-5.81986	-5.28079	-3.58194
									236	-5.49237	-5.83755	-6.02568	-6.00522	-6.11518	-5.93087	-5.3636	-3.62953
									235.9	-5.65611	-5.93276	-6.16911	-6.0786	-6.19929	-5.9921	-5.44701	-3.73684
									235.8	-5.75487	-6.03886	-6.31436	-6.15667	-6.32817	-6.16024	-5.55007	-3.79775
									235.7	-5.89082	-6.15107	-6.42284	-6.2763	-6.42224	-6.27982	-5.62619	-3.88062
									235.6	-5.98718	-6.23566	-6.50833	-6.37886	-6.501	-6.37857	-5.68321	-3.96033
									235.5	-6.14128	-6.35821	-6.59242	-6.49468	-6.63406	-6.45909	-5.74896	-3.99951
									235.4	-6.21513	-6.48665	-6.66955	-6.59756	-6.70956	-6.51992	-5.79915	-4.04949
									235.3	-6.344	-6.69407	-6.87116	-6.72339	-6.83407	-6.6541	-5.91748	-4.13133
									235.2	-6.38955	-6.82223	-6.98648	-6.82545	-6.95095	-6.71265	-5.95563	-4.17125
									235.1	-6.54863	-6.9693	-7.09246	-6.97205	-7.03607	-6.81496	-6.04397	-4.24847
									235	-6.70929	-7.11719	-7.21362	-7.10702	-7.15884	-6.92997	-6.05588	-4.31385
									234.9	-6.8152	-7.25902	-7.30755	-7.22519	-7.25522	-7.04876	-6.19376	-4.38073
									234.8	-6.95158	-7.40658	-7.44494	-7.35306	-7.34782	-7.16274	-6.26007	-4.4921
									234.7	-7.12823	-7.5782	-7.56864	-7.45421	-7.43709	-7.31922	-6.35556	-4.53971
									234.6	-7.29179	-7.69784	-7.7097	-7.5345	-7.60584	-7.46843	-6.49678	-4.63325
									234.5	-7.43245	-7.80912	-7.83306	-7.66956	-7.71945	-7.64158	-6.58189	-4.7259
									234.4	-7.55178	-7.96676	-7.9535	-7.81142	-7.83518	-7.7473	-6.72911	-4.78624
									234.3	-7.69727	-8.10458	-8.08833	-7.89484	-7.93976	-7.86785	-6.8414	-4.88337
									234.2	-7.82458	-8.21174	-8.19177	-7.98857	-8.05136	-7.9361	-6.93028	-4.93538
									234.1	-7.98217	-8.36433	-8.35947	-8.15845	-8.22134	-8.04681	-7.08057	-5.03159
									234	-8.12078	-8.54618	-8.49259	-8.30823	-8.34342	-8.15581	-7.19165	-5.13486
									233.9	-8.32644	-8.71051	-8.68154	-8.55844	-8.549	-8.31943	-7.33182	-5.21201
									233.8	-8.52052	-8.86338	-8.85798	-8.6689	-8.65752	-8.46041	-7.4404	-5.28539
									233.7	-8.6425	-8.97231	-8.97552	-8.81906	-8.79926	-8.53145	-7.56073	-5.38787
									233.6	-8.7936	-9.13253	-9.14398	-8.9624	-8.90917	-8.62618	-7.65806	-5.4665
									233.5	-8.94265	-9.258	-9.29741	-9.10509	-9.04342	-8.7961	-7.73102	-5.54514
									233.4	-9.0467	-9.33964	-9.40011	-9.20667	-9.09506	-8.94105	-7.86626	-5.62711
									233.3	-9.22294	-9.46281	-9.58194	-9.3379	-9.25543	-9.10356	-7.97035	-5.73409
									233.2	-9.42762	-9.68334	-9.71704	-9.49014	-9.38095	-9.26056	-8.09227	-5.8602
									233.1	-9.57657	-9.8207	-9.87377	-9.62715	-9.50278	-9.337	-8.26158	-5.97512
									233	-9.76328	-10.001	-10.0199	-9.74617	-9.67666	-9.50707	-8.3755	-6.02508
									232.9	-9.9562	-10.1424	-10.1799	-9.911	-9.78445	-9.69679	-8.47165	-6.1321
									232.8	-10.0871	-10.2748	-10.2931	-10.0599	-9.86269	-9.83792	-8.58647	-6.20211
									232.7	-10.2197	-10.4125	-10.3844	-10.1865	-10.0334	-9.95885	-8.67979	-6.26896
									232.6	-10.4289	-10.6403	-10.5806	-10.3633	-10.1925	-10.1563	-8.82532	-6.40116
									232.5	-10.5937	-10.8079	-10.7339	-10.5106	-10.3374	-10.3333	-8.93555	-6.50897
									232.4	-10.7871	-10.9724	-10.8989	-10.6391	-10.4717	-10.4415	-9.03901	-6.55055
									232.3	-10.9518	-11.1675	-11.0884	-10.8341	-10.5873	-10.5604	-9.1553	-6.59406
									232.2	-11.1516	-11.359	-11.2467	-11.0009	-10.6971	-10.6968	-9.29083	-6.66147
									232.1	-11.3378	-11.5158	-11.4121	-11.1315	-10.8979	-10.8827	-9.42423	-6.7849
									232	-11.5028	-11.7025	-11.5845	-11.3062	-11.0302	-11.0564	-9.56576	-6.84546
									231.9	-11.675	-11.8854	-11.7445	-11.4701	-11.1601	-11.1864	-9.66253	-6.95527
									231.8	-11.8183	-12.0265	-11.8995	-11.654	-11.2939	-11.2622	-9.8093	-6.94647
									231.7	-11.958	-12.073	-11.9812	-11.7621	-11.4096	-11.3468	-9.87092	-6.98531
									231.6	-12.155	-12.2507	-12.1546	-11.9285	-11.5584	-11.4063	-9.98111	-7.04483
									231.5	-12.3659	-12.4461	-12.3469	-12.1429	-11.7726	-11.5137	-10.1363	-7.17042
									231.4	-12.5342	-12.6346	-12.4586	-12.3046	-11.9045	-11.6728	-10.2181	-7.23625
									231.3	-12.7111	-12.7698	-12.6478	-12.4293	-12.0252	-11.843	-10.3664	-7.26471
									231.2	-12.9025	-12.9585	-12.8292	-12.6024	-12.1459	-12.0021	-10.4174	-7.35364
									231.1	-13.0489	-13.1269	-12.9751	-12.7744	-12.3014	-12.1237	-10.5219	-7.40747
									231	-13.2527	-13.2991	-13.1305	-12.9317	-12.3917	-12.2674	-10.6762	-7.5237
									230.9	-13.3367	-13.4256	-13.2438	-13.0149	-12.479	-12.3397	-10.7208	-7.58219
									230.8	-13.501	-13.6255	-13.39	-13.1434	-12.6224	-12.4177	-10.8694	-7.7028
									230.7	-13.7612	-13.8113	-13.5914	-13.3294	-12.7648	-12.5836	-10.9922	-7.7954
									230.6	-13.9927	-13.9913	-13.7339	-13.463	-12.9014	-12.6993	-11.116	-7.87412
									230.5	-14.1969	-14.1647	-13.9196	-13.6177	-13.0105	-12.8879	-11.204	-8.00895
									230.4	-14.3799	-14.3407	-14.0953	-13.7595	-13.2098	-13.059	-11.3373	-8.08519
									230.3	-14.5354	-14.5455	-14.2345	-13.8753	-13.3733	-13.1898	-11.4629	-8.17754
									230.2	-14.6744	-14.6735	-14.3641	-13.974	-13.5427	-13.3394	-11.5318	-8.24117
									230.1	-14.8565	-14.8463	-14.5741	-14.1211	-13.6425	-13.4996	-11.6157	-8.27521
									230	-14.972	-14.9123	-14.7029	-14.2651	-13.7759	-13.6409	-11.6887	-8.36794
									229.9	-15.1587	-15.1159	-14.9016	-14.4098	-13.9742	-13.7864	-11.8031	-8.37239
									229.8	-15.3653	-15.2879	-15.0669	-14.622	-14.0963	-13.9207	-11.9441	-8.44027
									229.7	-15.5904	-15.409	-15.2085	-14.7505	-14.1983	-14.0426	-12.0681	-8.52857
									229.6	-15.7891	-15.5689	-15.3626	-14.9047	-14.3454	-14.1804	-12.1552	-8.62942
									229.5	-15.9297	-15.7242	-15.5	-15.0516	-14.4593	-14.32	-12.2649	-8.67993
									229.4	-16.0627	-15.8773	-15.6407	-15.1881	-14.6091	-14.4524	-12.362	-8.81977
									229.3	-16.2011	-15.9811	-15.7997	-15.3268	-14.713	-14.616	-12.4761	-8.89794
									229.2	-16.3641	-16.1886	-15.9531	-15.4817	-14.8434	-14.7139	-12.5606	-8.98035
									229.1	-16.4847	-16.3743	-16.0865	-15.609	-14.9736	-14.8129	-12.6723	-9.01758
									229	-16.671	-16.5641	-16.2382	-15.7669	-15.1051	-14.9151	-12.7351	-9.09624
									228.9	-16.8846	-16.8312	-16.428	-15.9653	-15.2784	-15.0178	-12.903	-9.19089
									228.8	-17.0598	-16.9577	-16.5781	-16.119	-15.4392	-15.1265	-13.0014	-9.2471
									228.7	-17.2642	-17.0666	-16.7717	-16.2326	-15.5957	-15.2473	-13.0822	-9.2584
									228.6	-17.4126	-17.2587	-16.9115	-16.3697	-15.712	-15.3582	-13.1436	-9.36972
									228.5	-17.6002	-17.3895	-17.1109	-16.4956	-15.8266	-15.5072	-13.3092	-9.43071
									228.4	-17.7408	-17.5624	-17.2688	-16.6273	-15.9754	-15.6118	-13.3878	-9.48628
									228.3	-17.8942	-17.7003	-17.3874	-16.6969	-16.1246	-15.7431	-13.5163	-9.52334
									228.2	-18.0676	-17.8889	-17.516	-16.8981	-16.2383	-15.8507	-13.6009	-9.59495
									228.1	-18.2734	-18.035	-17.6831	-17.0737	-16.3882	-15.9292	-13.6244	-9.66585
									228	-18.4347	-18.2192	-17.8533	-17.2446	-16.4995	-16.0545	-13.7081	-9.7272
									227.9	-18.5841	-18.4214	-18.0031	-17.3573	-16.5944	-16.1582	-13.8193	-9.82247
									227.8	-18.6911	-18.5553	-18.1037	-17.4565	-16.6576	-16.3103	-13.9054	-9.89015
									227.7	-18.847	-18.7223	-18.2386	-17.565	-16.7861	-16.462	-14.0559	-9.9195
									227.6	-18.9918	-18.8434	-18.3358	-17.6823	-16.9562	-16.5885	-14.1226	-9.99201
									227.5	-19.088	-18.9563	-18.4213	-17.8081	-17.0826	-16.6503	-14.2152	-10.0405
									227.4	-19.2407	-19.1365	-18.6328	-17.919	-17.2558	-16.6821	-14.3413	-10.1053
									227.3	-19.3761	-19.2789	-18.7578	-18.048	-17.3763	-16.77	-14.4039	-10.1788
									227.2	-19.4916	-19.4028	-18.9231	-18.156	-17.5423	-16.8611	-14.4617	-10.2427
									227.1	-19.6675	-19.5442	-19.0112	-18.282	-17.672	-17.0059	-14.6131	-10.2617
									227	-19.7956	-19.6149	-19.0826	-18.3591	-17.805	-17.1074	-14.6859	-10.3293
									226.9	-19.9426	-19.725	-19.201	-18.4412	-17.8943	-17.2083	-14.8038	-10.3745
									226.8	-20.0936	-19.8476	-19.2862	-18.5364	-18.0292	-17.2949	-14.9064	-10.4303
									226.7	-20.2112	-19.937	-19.469	-18.6384	-18.1767	-17.3386	-14.9618	-10.5259
									226.6	-20.3469	-20.0073	-19.5677	-18.7561	-18.2392	-17.396	-15.0033	-10.5629
									226.5	-20.4318	-20.0643	-19.6548	-18.8325	-18.3397	-17.4958	-15.0636	-10.537
									226.4	-20.5186	-20.1457	-19.7489	-18.9547	-18.4459	-17.5302	-15.1253	-10.6028
									226.3	-20.6226	-20.2596	-19.8445	-19.0736	-18.552	-17.588	-15.1892	-10.6229
									226.2	-20.7059	-20.4013	-19.9175	-19.2137	-18.6747	-17.662	-15.2146	-10.7018
									226.1	-20.8032	-20.4869	-20.0106	-19.3395	-18.7594	-17.7546	-15.2638	-10.7312
									226	-20.9525	-20.5868	-20.1084	-19.4807	-18.814	-17.8703	-15.3552	-10.7938
									225.9	-21.0921	-20.6614	-20.2008	-19.5373	-18.8396	-17.9354	-15.3883	-10.8019
									225.8	-21.1801	-20.7559	-20.3138	-19.5992	-18.9102	-17.9912	-15.4775	-10.8412
									225.7	-21.3279	-20.8652	-20.4108	-19.6984	-19.0142	-18.0918	-15.5946	-10.8866
									225.6	-21.4203	-20.9294	-20.5033	-19.7889	-19.093	-18.1633	-15.6421	-10.9242
									225.5	-21.4899	-20.9979	-20.5372	-19.8343	-19.1912	-18.2621	-15.7213	-10.939
									225.4	-21.6221	-21.1422	-20.5768	-19.9701	-19.3125	-18.4059	-15.7949	-10.9661
									225.3	-21.7803	-21.2591	-20.6723	-20.0738	-19.3572	-18.4869	-15.8701	-11.0422
									225.2	-21.8383	-21.3648	-20.7421	-20.1498	-19.4456	-18.4843	-15.914	-11.0411
									225.1	-21.8937	-21.4051	-20.78	-20.2489	-19.5009	-18.5401	-15.9874	-11.0748
									225	-22.0226	-21.4951	-20.8549	-20.339	-19.5895	-18.5619	-16.077	-11.1079
									224.9	-22.0966	-21.5772	-20.9262	-20.4083	-19.6736	-18.663	-16.1138	-11.1121
									224.8	-22.1555	-21.6749	-21.0403	-20.5043	-19.7196	-18.7406	-16.1888	-11.1443
									224.7	-22.1902	-21.6928	-21.0881	-20.557	-19.7653	-18.7528	-16.1953	-11.162
									224.6	-22.2236	-21.8316	-21.1297	-20.6465	-19.8721	-18.7857	-16.2158	-11.2112
									224.5	-22.2559	-21.889	-21.2011	-20.7396	-19.9325	-18.8224	-16.2696	-11.2199
									224.4	-22.3556	-21.9371	-21.2734	-20.8499	-19.9818	-18.8712	-16.3365	-11.2238
									224.3	-22.4288	-21.9715	-21.3673	-20.8776	-20.0017	-18.8961	-16.3802	-11.2348
									224.2	-22.4858	-22.0325	-21.4461	-20.9279	-20.0432	-18.9637	-16.4355	-11.255
									224.1	-22.5003	-22.0511	-21.4925	-21.0186	-20.0744	-18.9986	-16.445	-11.2958
									224	-22.53	-22.0619	-21.558	-21.0221	-20.1814	-19.0793	-16.4704	-11.299
									223.9	-22.5706	-22.1362	-21.6058	-21.1014	-20.173	-19.103	-16.4904	-11.3401
									223.8	-22.6213	-22.1711	-21.6697	-21.1176	-20.2533	-19.1049	-16.4903	-11.3965
									223.7	-22.6931	-22.1774	-21.7342	-21.1566	-20.3349	-19.1198	-16.5245	-11.3729
									223.6	-22.7861	-22.2845	-21.7873	-21.1788	-20.4189	-19.198	-16.539	-11.4559
									223.5	-22.8233	-22.3612	-21.8548	-21.1959	-20.4559	-19.247	-16.5314	-11.5097
									223.4	-22.868	-22.4185	-21.9261	-21.2669	-20.4736	-19.296	-16.5529	-11.5369
									223.3	-22.9174	-22.4416	-21.9593	-21.2502	-20.4636	-19.3121	-16.6099	-11.5501
									223.2	-22.9691	-22.4895	-22.0154	-21.2589	-20.4504	-19.3259	-16.6339	-11.5789
									223.1	-23.0434	-22.5864	-22.051	-21.3281	-20.4826	-19.307	-16.6479	-11.6324
									223	-23.057	-22.6538	-22.0621	-21.3547	-20.5599	-19.326	-16.7241	-11.6258
									222.9	-23.1084	-22.6932	-22.0791	-21.4432	-20.5531	-19.3233	-16.7766	-11.6879
									222.8	-23.0911	-22.7033	-22.1359	-21.4623	-20.5827	-19.3433	-16.7678	-11.665
									222.7	-23.1513	-22.749	-22.1726	-21.538	-20.6139	-19.3588	-16.853	-11.6789
									222.6	-23.1749	-22.7758	-22.1985	-21.5761	-20.6404	-19.4538	-16.8991	-11.6697
									222.5	-23.1922	-22.7935	-22.2077	-21.5929	-20.654	-19.4896	-16.9054	-11.6782
									222.4	-23.1568	-22.7616	-22.2523	-21.644	-20.6923	-19.465	-16.9388	-11.7068
									222.3	-23.1648	-22.7531	-22.2313	-21.636	-20.7172	-19.5165	-16.905	-11.7096
									222.2	-23.1704	-22.7884	-22.2804	-21.5922	-20.7652	-19.4678	-16.9073	-11.6697
									222.1	-23.2502	-22.7639	-22.2715	-21.6564	-20.7783	-19.504	-16.9126	-11.6319
									222	-23.2988	-22.8007	-22.3154	-21.6862	-20.7412	-19.5451	-16.9469	-11.6791
									221.9	-23.3269	-22.7404	-22.2784	-21.7214	-20.6857	-19.5451	-16.9771	-11.7114
									221.8	-23.3164	-22.7682	-22.2644	-21.7729	-20.68	-19.5902	-17.0594	-11.7362
									221.7	-23.3092	-22.7676	-22.1949	-21.7506	-20.6367	-19.6203	-17.0673	-11.7901
									221.6	-23.347	-22.7881	-22.2114	-21.7052	-20.6714	-19.5947	-17.1181	-11.8142
									221.5	-23.3064	-22.8103	-22.2531	-21.712	-20.7039	-19.6359	-17.0941	-11.84
									221.4	-23.3184	-22.7651	-22.2303	-21.7316	-20.7224	-19.6687	-17.1457	-11.8657
									221.3	-23.3097	-22.8042	-22.2566	-21.731	-20.7422	-19.6348	-17.1429	-11.8251
									221.2	-23.3747	-22.7808	-22.2724	-21.7546	-20.7709	-19.662	-17.1593	-11.8074
									221.1	-23.3743	-22.7875	-22.2364	-21.7374	-20.7453	-19.6934	-17.1622	-11.7877
									221	-23.3426	-22.799	-22.2317	-21.7215	-20.7796	-19.7052	-17.1714	-11.7868
									220.9	-23.3535	-22.7874	-22.2614	-21.7088	-20.7718	-19.6943	-17.1277	-11.8683
									220.8	-23.3613	-22.7876	-22.2562	-21.6625	-20.7469	-19.7416	-17.158	-11.8561
									220.7	-23.2954	-22.7767	-22.2818	-21.615	-20.7632	-19.7658	-17.2322	-11.8715
									220.6	-23.3387	-22.7626	-22.1907	-21.6366	-20.7897	-19.797	-17.2241	-11.884
									220.5	-23.2971	-22.7761	-22.2134	-21.6368	-20.775	-19.7753	-17.2342	-11.9211
									220.4	-23.2508	-22.8077	-22.1661	-21.6597	-20.758	-19.7722	-17.2408	-11.9479
									220.3	-23.2315	-22.7464	-22.1831	-21.6471	-20.7752	-19.7985	-17.2176	-11.9349
									220.2	-23.2285	-22.7397	-22.171	-21.6388	-20.7479	-19.7776	-17.167	-11.9288
									220.1	-23.2288	-22.7315	-22.1755	-21.6956	-20.7459	-19.7781	-17.1903	-11.9628
									220	-23.1881	-22.7008	-22.1996	-21.7322	-20.7584	-19.7495	-17.2333	-12.0035
									219.9	-23.1973	-22.6559	-22.196	-21.7215	-20.7425	-19.7727	-17.2185	-11.9677
									219.8	-23.1156	-22.6508	-22.1681	-21.6799	-20.7428	-19.8139	-17.2904	-11.9161
									219.7	-23.1217	-22.6106	-22.1684	-21.6424	-20.7702	-19.8365	-17.3151	-11.8917
									219.6	-23.1238	-22.5555	-22.1259	-21.6263	-20.8117	-19.8051	-17.338	-11.8976
									219.5	-23.1462	-22.4936	-22.1106	-21.6104	-20.8253	-19.7823	-17.3434	-11.8339
									219.4	-23.1043	-22.4611	-22.1001	-21.5871	-20.8529	-19.7483	-17.355	-11.8704
									219.3	-23.06	-22.4156	-22.1562	-21.6	-20.8564	-19.7474	-17.3192	-11.8557
									219.2	-23.0339	-22.449	-22.1703	-21.5665	-20.8037	-19.761	-17.2971	-11.8427
									219.1	-23.0244	-22.4419	-22.1353	-21.5431	-20.7959	-19.8056	-17.2796	-11.8642
									219	-22.9872	-22.4462	-22.1082	-21.5446	-20.7606	-19.8085	-17.3097	-11.8659
									218.9	-22.995	-22.3803	-22.12	-21.5035	-20.7229	-19.7841	-17.3498	-11.8692
									218.8	-23.0183	-22.3845	-22.089	-21.4687	-20.7288	-19.8347	-17.3288	-11.8537
									218.7	-22.9812	-22.3584	-22.0505	-21.4494	-20.726	-19.8098	-17.3023	-11.8548
									218.6	-22.9727	-22.341	-22.0273	-21.4677	-20.6606	-19.8086	-17.3055	-11.8664
									218.5	-22.9353	-22.3079	-22.0199	-21.4897	-20.5878	-19.7873	-17.2904	-11.8529
									218.4	-22.8643	-22.2947	-22.0016	-21.5536	-20.5812	-19.7745	-17.3052	-11.8611
									218.3	-22.8237	-22.2537	-21.9789	-21.5496	-20.5641	-19.7717	-17.3011	-11.8524
									218.2	-22.7621	-22.3058	-21.9739	-21.5701	-20.5694	-19.7415	-17.3664	-11.8228
									218.1	-22.7139	-22.3058	-21.9359	-21.5454	-20.5621	-19.6755	-17.3363	-11.8287
									218	-22.7172	-22.2373	-21.8598	-21.5104	-20.6281	-19.6594	-17.3259	-11.828
									217.9	-22.7104	-22.2487	-21.8723	-21.4926	-20.6332	-19.6674	-17.3279	-11.8067
									217.8	-22.6725	-22.2295	-21.8539	-21.5158	-20.6234	-19.6399	-17.3114	-11.7922
									217.7	-22.6585	-22.1858	-21.8701	-21.4805	-20.637	-19.6695	-17.3538	-11.7618
									217.6	-22.5793	-22.1703	-21.8441	-21.422	-20.6327	-19.6356	-17.3472	-11.7326
									217.5	-22.5229	-22.1878	-21.7925	-21.4255	-20.596	-19.6534	-17.315	-11.8126
									217.4	-22.5327	-22.1466	-21.7532	-21.4349	-20.6406	-19.6518	-17.2916	-11.8065
									217.3	-22.506	-22.075	-21.7316	-21.3956	-20.6523	-19.6489	-17.3069	-11.8119
									217.2	-22.4739	-22.011	-21.6712	-21.3254	-20.6214	-19.6475	-17.3284	-11.8424
									217.1	-22.4374	-22.017	-21.6359	-21.326	-20.5886	-19.6163	-17.289	-11.8619
									217	-22.3959	-22.0109	-21.6462	-21.3195	-20.5826	-19.5772	-17.2794	-11.8494
									216.9	-22.4093	-21.9649	-21.6406	-21.3286	-20.5773	-19.511	-17.2896	-11.833
									216.8	-22.388	-21.9093	-21.6758	-21.2941	-20.568	-19.5502	-17.2979	-11.8142
									216.7	-22.37	-21.975	-21.6756	-21.3132	-20.5861	-19.5448	-17.2984	-11.8457
									216.6	-22.3825	-21.9336	-21.6695	-21.2885	-20.5609	-19.5119	-17.2692	-11.8489
									216.5	-22.4	-21.9103	-21.6673	-21.2843	-20.5526	-19.4928	-17.2068	-11.8959
									216.4	-22.3816	-21.9004	-21.5899	-21.2654	-20.5718	-19.4869	-17.1704	-11.9395
									216.3	-22.3603	-21.9195	-21.5279	-21.2486	-20.5299	-19.4622	-17.1967	-11.9672
									216.2	-22.3496	-21.8583	-21.5074	-21.1879	-20.4759	-19.4626	-17.2375	-11.9899
									216.1	-22.3371	-21.8221	-21.4359	-21.1752	-20.478	-19.4554	-17.2451	-12.0021
									216	-22.303	-21.7888	-21.4596	-21.1784	-20.4844	-19.4366	-17.2559	-12.014
									215.9	-22.2673	-21.8181	-21.428	-21.149	-20.4917	-19.4509	-17.2469	-12.0519
									215.8	-22.2684	-21.8214	-21.3489	-21.1498	-20.5065	-19.4395	-17.222	-12.0159
									215.7	-22.2458	-21.837	-21.3192	-21.036	-20.5242	-19.4576	-17.1679	-12.034
									215.6	-22.2389	-21.8691	-21.2979	-21.0592	-20.5477	-19.4775	-17.1847	-12.1341
									215.5	-22.2312	-21.8138	-21.2423	-20.9982	-20.5405	-19.4917	-17.1983	-12.1575
									215.4	-22.1738	-21.8157	-21.2067	-20.9855	-20.5087	-19.4451	-17.2498	-12.1095
									215.3	-22.1176	-21.87	-21.2076	-21.0102	-20.4629	-19.4353	-17.2294	-12.1109
									215.2	-22.0626	-21.8301	-21.1871	-20.9988	-20.4688	-19.3984	-17.2246	-12.0782
									215.1	-22.0814	-21.8439	-21.1823	-20.9736	-20.4223	-19.3905	-17.2277	-12.0764
									215	-22.0468	-21.816	-21.186	-20.9576	-20.421	-19.4109	-17.2548	-12.084
									214.9	-22.0322	-21.792	-21.1842	-20.993	-20.4502	-19.3829	-17.2281	-12.1011
									214.8	-22.07	-21.7489	-21.2302	-20.938	-20.486	-19.4715	-17.2189	-12.1147
									214.7	-22.0542	-21.6576	-21.1765	-20.9377	-20.4953	-19.5115	-17.2574	-12.1308
									214.6	-22.0501	-21.6083	-21.1461	-20.9006	-20.5469	-19.596	-17.2818	-12.1792
									214.5	-22.0452	-21.573	-21.1385	-20.8814	-20.4832	-19.6239	-17.2745	-12.2043
									214.4	-22.0496	-21.5306	-21.0854	-20.8663	-20.5279	-19.686	-17.2995	-12.261
									214.3	-21.9845	-21.5101	-21.0739	-20.8731	-20.5741	-19.7666	-17.3168	-12.2612
									214.2	-22.0027	-21.5101	-21.0659	-20.8364	-20.5257	-19.7205	-17.3101	-12.341
									214.1	-21.9832	-21.5466	-21.0891	-20.8778	-20.5397	-19.6999	-17.317	-12.4203
									214	-21.9598	-21.6323	-21.1281	-20.9148	-20.5201	-19.7493	-17.3921	-12.4332
									213.9	-21.9537	-21.6234	-21.1282	-21.0043	-20.5822	-19.7598	-17.441	-12.44
									213.8	-21.9497	-21.5933	-21.1284	-21.05	-20.5571	-19.7973	-17.4329	-12.4879
									213.7	-21.8906	-21.6841	-21.2101	-21.097	-20.5862	-19.7473	-17.4443	-12.5463
									213.6	-21.8261	-21.6833	-21.257	-21.1046	-20.6505	-19.7812	-17.4801	-12.4959
									213.5	-21.8301	-21.7712	-21.3131	-21.1059	-20.7166	-19.8275	-17.4901	-12.5112
									213.4	-21.8548	-21.8163	-21.2941	-21.0331	-20.7304	-19.8305	-17.5273	-12.5648
									213.3	-21.8649	-21.8187	-21.2897	-21.0542	-20.7373	-19.8412	-17.5698	-12.5224
									213.2	-21.8508	-21.8735	-21.2559	-21.1464	-20.7459	-19.892	-17.5784	-12.5762
									213.1	-21.8686	-21.9126	-21.2306	-21.1404	-20.7722	-19.9083	-17.6731	-12.6364
									213	-21.8851	-21.9648	-21.2699	-21.1177	-20.7849	-19.8702	-17.6853	-12.6843
									212.9	-21.9062	-21.9799	-21.3304	-21.116	-20.7784	-19.9079	-17.7431	-12.7605
									212.8	-21.8916	-21.9977	-21.2871	-21.1392	-20.79	-19.965	-17.7493	-12.8197
									212.7	-21.9495	-22.0033	-21.3076	-21.185	-20.8403	-20.0225	-17.7891	-12.8631
									212.6	-21.9403	-22.0075	-21.2622	-21.1266	-20.8704	-20.0364	-17.856	-12.9249
									212.5	-22.0171	-21.9957	-21.3015	-21.2124	-20.8722	-20.0064	-17.9241	-12.8911
									212.4	-22.0362	-22.0219	-21.3047	-21.2321	-20.9401	-20.0563	-17.9242	-12.9781
									212.3	-22.0599	-22.0335	-21.3432	-21.2945	-20.8756	-20.0299	-17.9066	-13.0636
									212.2	-22.0513	-22.0519	-21.3507	-21.263	-20.9182	-20.083	-17.913	-13.0421
									212.1	-22.0783	-22.0374	-21.3139	-21.2956	-20.9217	-20.1106	-17.9409	-13.1036
									212	-22.1097	-22.0413	-21.3278	-21.3811	-20.9386	-20.1079	-17.9532	-13.1613
									211.9	-22.0571	-22.0635	-21.3574	-21.4191	-20.9318	-20.0439	-17.978	-13.2088
									211.8	-22.0686	-22.1278	-21.372	-21.4404	-21.0152	-20.0264	-18.0198	-13.3091
									211.7	-22.0529	-22.1175	-21.3818	-21.4487	-21.0159	-20.1268	-18.0164	-13.3121
									211.6	-22.0941	-22.1105	-21.36	-21.4028	-21.0106	-20.0917	-18.0064	-13.2836
									211.5	-22.0428	-22.0957	-21.4025	-21.4001	-21.0386	-20.1386	-17.9927	-13.3874
									211.4	-22.0839	-22.1407	-21.4194	-21.479	-21.0161	-20.1313	-17.9666	-13.4186
									211.3	-22.0438	-22.1689	-21.3973	-21.4766	-20.9801	-20.1932	-18.0165	-13.516
									211.2	-22.0366	-22.1864	-21.3884	-21.5703	-20.9827	-20.2177	-18.0546	-13.5939
									211.1	-22.0913	-22.1805	-21.3856	-21.6399	-20.9732	-20.1887	-18.0544	-13.6125
									211	-22.0864	-22.2155	-21.3538	-21.6567	-20.9705	-20.1902	-18.0717	-13.6288
									210.9	-22.0564	-22.2976	-21.2681	-21.6286	-20.9276	-20.1752	-18.1005	-13.7299
									210.8	-22.0521	-22.2449	-21.2501	-21.6595	-20.8346	-20.1551	-18.1359	-13.6687
									210.7	-22.0521	-22.2419	-21.2708	-21.6852	-20.8957	-20.124	-18.1329	-13.6856
									210.6	-22.0577	-22.2656	-21.247	-21.6631	-20.8982	-20.1685	-18.1201	-13.6403
									210.5	-22.0321	-22.2542	-21.2677	-21.6725	-20.8235	-20.1234	-18.1355	-13.7364
									210.4	-22.0118	-22.2695	-21.2802	-21.689	-20.8018	-20.1005	-18.1552	-13.8289
									210.3	-21.9988	-22.2914	-21.2372	-21.6553	-20.8107	-20.1358	-18.1586	-13.805
									210.2	-21.981	-22.2107	-21.262	-21.6242	-20.823	-20.0971	-18.1971	-13.8236
									210.1	-21.9541	-22.2249	-21.2506	-21.619	-20.8218	-20.0682	-18.1988	-13.8351
									210	-21.9659	-22.2003	-21.2147	-21.5921	-20.8084	-20.106	-18.2402	-13.8883
									209.9	-21.9497	-22.2173	-21.1506	-21.5161	-20.7667	-20.0492	-18.2616	-13.8968
									209.8	-21.9167	-22.2323	-21.1608	-21.4607	-20.7043	-20.0805	-18.2241	-13.9334
									209.7	-21.8721	-22.1235	-21.0945	-21.4363	-20.5772	-19.9856	-18.2264	-13.9877
									209.6	-21.7926	-22.0905	-21.0411	-21.3732	-20.52	-19.9263	-18.2616	-14.0112
									209.5	-21.7713	-22.071	-20.9876	-21.3609	-20.5407	-19.8072	-18.2725	-14.1297
									209.4	-21.7577	-22.0629	-20.9552	-21.3592	-20.4851	-19.732	-18.226	-14.1398
									209.3	-21.7061	-22.0152	-20.9551	-21.3004	-20.4268	-19.707	-18.282	-14.0833
									209.2	-21.6069	-21.9838	-20.9508	-21.2123	-20.3508	-19.6278	-18.1848	-14.0708
									209.1	-21.5583	-21.9689	-20.847	-21.1772	-20.2473	-19.5634	-18.19	-14.0618
									209	-21.4872	-21.9736	-20.8924	-21.1993	-20.2334	-19.5159	-18.1401	-13.999
									208.9	-21.5143	-21.8238	-20.8612	-21.1629	-20.1322	-19.512	-18.0165	-13.9755
									208.8	-21.4706	-21.7508	-20.8858	-21.1194	-20.095	-19.4893	-18.0204	-13.9808
									208.7	-21.3628	-21.6809	-20.7921	-21.0359	-20.0713	-19.4189	-17.9997	-13.8728
									208.6	-21.338	-21.6172	-20.7678	-20.9765	-20.001	-19.3589	-17.9495	-13.8972
									208.5	-21.2807	-21.5007	-20.6292	-20.8793	-19.8221	-19.3733	-17.8754	-13.8612
									208.4	-21.1663	-21.4191	-20.5578	-20.7427	-19.774	-19.3545	-17.8446	-13.8141
									208.3	-21.0298	-21.3426	-20.4949	-20.6712	-19.7262	-19.2834	-17.8168	-13.8081
									208.2	-20.9481	-21.2784	-20.4593	-20.5838	-19.6509	-19.2207	-17.747	-13.608
									208.1	-20.8056	-21.2027	-20.3713	-20.4596	-19.5669	-19.1067	-17.6598	-13.4725
									208	-20.6709	-21.0208	-20.2382	-20.3307	-19.4841	-18.9235	-17.611	-13.4758
									207.9	-20.5868	-20.8862	-20.202	-20.1892	-19.4619	-18.8515	-17.4704	-13.538
									207.8	-20.4978	-20.697	-20.0098	-20.006	-19.2747	-18.7395	-17.2609	-13.5768
									207.7	-20.3696	-20.5629	-19.8675	-19.9232	-19.1809	-18.6292	-17.2331	-13.5958
									207.6	-20.2396	-20.403	-19.7183	-19.7842	-19.1244	-18.5115	-17.1492	-13.5448
									207.5	-20.2134	-20.2535	-19.5919	-19.7366	-18.9396	-18.3485	-17.1519	-13.5773
									207.4	-20.094	-20.0926	-19.4561	-19.5824	-18.793	-18.1478	-17.003	-13.3559
									207.3	-19.9588	-19.9603	-19.3863	-19.4355	-18.6196	-18.054	-16.8842	-13.2364
									207.2	-19.8218	-19.758	-19.2673	-19.3188	-18.4859	-17.9352	-16.7396	-13.3359
									207.1	-19.6822	-19.5979	-19.1676	-19.1806	-18.3689	-17.7455	-16.7321	-13.329
									207	-19.5706	-19.4475	-18.9383	-19.0459	-18.1741	-17.6074	-16.5913	-13.1286
									206.9	-19.4442	-19.2294	-18.74	-18.8571	-17.9411	-17.406	-16.5204	-13.036
									206.8	-19.2568	-19.0924	-18.6238	-18.7609	-17.6781	-17.3718	-16.3663	-12.9689
									206.7	-19.0402	-18.8799	-18.4501	-18.5704	-17.5407	-17.114	-16.3005	-12.9017
									206.6	-18.8548	-18.7804	-18.3204	-18.4802	-17.419	-16.9747	-16.2646	-12.8569
									206.5	-18.6738	-18.5979	-18.0952	-18.3308	-17.2597	-16.8542	-16.2027	-12.7208
									206.4	-18.5004	-18.466	-17.8838	-18.1064	-17.0577	-16.612	-15.9766	-12.4797
									206.3	-18.2625	-18.1957	-17.643	-18.0633	-16.8565	-16.4439	-15.8138	-12.7273
									206.2	-18.1111	-18.0319	-17.4651	-17.7702	-16.7545	-16.1852	-15.7286	-12.5547
									206.1	-17.9187	-17.7359	-17.2148	-17.4961	-16.4832	-15.9581	-15.4728	-12.3724
									206	-17.6963	-17.4689	-16.9299	-17.1751	-16.2106	-15.6812	-15.2163	-12.3138
									205.9	-17.4001	-17.1671	-16.5866	-16.8369	-15.9391	-15.4935	-14.9736	-12.3674
									205.8	-17.1131	-16.7596	-16.2246	-16.3777	-15.7126	-15.08	-14.543	-12.1344
									205.7	-16.7302	-16.4744	-15.9197	-16.0204	-15.3913	-14.8388	-14.3593	-12.2224
									205.6	-16.4034	-16.1368	-15.4603	-15.7063	-15.0661	-14.6054	-14.1843	-12.3918
									205.5	-16.1033	-15.7165	-15.0908	-15.3881	-14.7633	-14.3854	-13.8987	-12.2747
									205.4	-15.8465	-15.4298	-14.7833	-15.0819	-14.521	-14.0738	-13.7347	-12.0626
									205.3	-15.4773	-15.1228	-14.4594	-14.6851	-14.2844	-13.4627	-13.4897	-11.5695
									205.2	-15.2257	-14.7914	-14.2094	-14.4066	-14.0227	-13.1299	-13.2379	-11.5098
									205.1	-14.9782	-14.5146	-13.987	-14.15	-13.8543	-12.8004	-12.8091	-11.5109
									205	-14.569	-14.1773	-13.7448	-13.848	-13.4317	-12.4239	-12.5142	-11.5545
									204.9	-14.283	-13.9212	-13.4818	-13.7216	-13.1887	-12.1688	-12.3806	-11.2309
									204.8	-13.9892	-13.6802	-13.1902	-13.4509	-13.0072	-12.1104	-12.0711	-11.0086
									204.7	-13.6606	-13.3389	-12.8384	-13.1184	-12.7556	-11.6844	-11.9546	-11.038
									204.6	-13.3882	-13.1638	-12.6514	-12.8171	-12.5515	-11.3285	-11.8757	-10.6317
									204.5	-13.0185	-12.9303	-12.4524	-12.6233	-12.2216	-11.0628	-11.7846	-10.5865
									204.4	-12.7193	-12.561	-12.1551	-12.459	-11.8939	-10.7666	-11.4463	-9.84062
									204.3	-12.405	-12.1945	-11.7418	-12.1152	-11.6499	-10.3913	-11.2987	-9.32639
									204.2	-12.13	-11.9067	-11.3998	-11.9428	-11.453	-9.94825	-10.9131	-9.38196
									204.1	-11.5991	-11.4436	-10.879	-11.5471	-11.1707	-9.41764	-10.3348	-9.21834
									204	-11.147	-11.0933	-10.549	-11.0715	-10.9212	-9.18245	-10.274	-8.83726
									203.9	-10.8172	-10.783	-10.191	-10.6473	-10.7618	-8.77291	-9.94278	-8.56576
									203.8	-10.3842	-10.4204	-9.79785	-10.2522	-10.2347	-8.3492	-9.77324	-7.74754
									203.7	-10.0286	-9.92626	-9.28268	-9.74312	-10.0491	-8.13455	-8.90205	-8.41016
									203.6	-9.6011	-9.49772	-8.85813	-9.32906	-9.4191	-7.76777	-8.64239	-7.46769
									203.5	-9.22073	-9.12259	-8.42494	-8.95631	-9.16418	-7.07495	-8.37547	-7.7067
									203.4	-8.85519	-8.84835	-8.06944	-8.54832	-8.6126	-6.80864	-8.00662	-7.19549
									203.3	-8.36583	-8.27649	-7.58553	-8.13869	-8.09408	-6.29651	-7.80864	-7.11783
									203.2	-7.96273	-7.84044	-7.2288	-7.76856	-7.80158	-5.95534	-7.25624	-6.82027
									203.1	-7.52023	-7.38111	-6.64266	-7.16021	-7.5006	-5.59393	-7.07366	-6.82421
									203	-7.0181	-6.91461	-6.2947	-6.63554	-6.93563	-5.14618	-6.33186	-6.32821
									202.9	-6.46263	-6.27101	-5.73072	-5.9966	-6.51108	-4.38484	-6.05584	-6.68435
									202.8	-6.01905	-5.75256	-5.29861	-5.40558	-6.19417	-4.07213	-5.69956	-6.68248
									202.7	-5.62544	-5.30047	-4.79321	-4.87475	-6.13034	-3.56294	-5.6641	-6.34188
									202.6	-5.14101	-4.67823	-4.23576	-4.11021	-5.51409	-3.46752	-4.64683	-5.29602
									202.5	-4.67839	-4.31917	-3.71477	-3.47805	-5.08047	-3.79692	-4.68291	-4.78481
									202.4	-4.00249	-3.65039	-3.07868	-2.78183	-4.60507	-2.89301	-3.55668	-3.37502
									202.3	-3.3869	-2.93604	-2.41579	-2.23611	-3.80198	-2.25066	-2.97097	-2.71602
									202.2	-2.78136	-2.31341	-1.81683	-1.64876	-3.25527	-1.60223	-2.19402	-2.08209
									202.1	-2.21807	-1.84569	-1.27309	-1.07102	-2.67825	-1.23209	-1.50639	-1.73719
									202	-1.61828	-1.4043	-0.808919	-0.679405	-2.56297	-0.450856	-0.397942	-1.03936
									201.9	-0.951413	-0.514098	-0.266432	-0.204066	-1.88765	-1.17341	0.151326	-1.26146
									201.8	-0.398341	0.149604	0.248959	0.154615	-1.37356	-1.19103	0.402554	-1.87821
									201.7	0.470567	0.771944	0.927287	0.555294	-0.938923	-1.37069	1.01171	-1.39925
									201.6	1.00371	1.50918	1.42964	1.04519	-0.895369	-1.17053	1.47376	-1.03864
									201.5	1.46203	2.03975	1.77936	1.34718	-0.53603	-0.796655	2.31065	-0.801866
									201.4	2.06583	2.60447	2.48965	2.57977	0.0945882	-1.15721	4.34765	0.519
									201.3	2.5756	3.10571	3.08622	2.9154	0.956965	-1.54711	4.32653	1.25884
									201.2	3.21083	3.65828	3.64737	3.42829	0.898163	-1.62488	4.94489	2.33413
									201.1	3.87526	4.53566	4.30071	4.48891	2.10683	-0.756721	4.57373	3.00029
									201	4.50326	5.33288	4.99672	5.05011	2.43232	0.430849	4.22784	3.04991
									200.9	5.1002	6.01967	5.5455	5.73442	2.07211	1.20798	4.72146	3.74964
									200.8	5.63457	6.59252	5.67415	6.41154	1.82398	1.91223	4.80136	4.43508
									200.7	6.17298	7.10653	6.16517	7.17627	2.26652	2.49446	5.0416	6.05743
									200.6	6.90198	7.76346	6.79448	7.5448	1.99363	2.74986	5.98752	5.80397
									200.5	7.44666	8.46845	7.27425	7.95435	2.76345	3.28406	6.23357	5.67813
									200.4	8.26132	9.02721	7.98878	8.3686	2.95857	2.57477	6.34816	6.45727
									200.3	8.93027	9.80953	8.82562	8.98757	2.49979	3.08588	6.62739	7.13739
									200.2	9.2442	10.1331	9.37729	9.99349	3.72776	3.00004	7.22689	8.05136
									200.1	9.84797	10.7202	9.87736	10.6623	3.9798	3.32045	7.07796	8.27614
									200	10.4278	10.869	10.0698	9.92189	2.69874	3.52037	6.6219	9.5469
									199.9	11.0225	11.4257	10.133	10.6144	2.76652	3.98442	7.60466	10.429
									199.8	11.7651	11.9959	11.349	12.4757	3.11544	4.22396	7.62167	9.93635
									199.7	12.444	12.9266	11.5951	13.2561	4.18288	3.66251	7.09864	8.77238
									199.6	13.304	13.464	12.5429	13.8377	4.16	2.31918	7.25517	7.86234
									199.5	13.9651	14.1378	12.5915	14.1538	5.20339	3.72343	7.87787	7.50591
									199.4	14.6218	14.4634	12.3992	14.5752	4.84997	3.96568	7.13002	8.47028
									199.3	15.0166	15.083	13.0932	14.4565	4.03476	4.96525	8.50784	8.65807
									199.2	15.7782	15.598	13.301	15.1516	4.28834	5.68761	8.1044	8.98975
									199.1	16.8097	17.5556	13.9405	14.0369	4.08402	5.13715	7.51169	9.91671
									199	17.4285	18.4872	13.6996	14.8005	5.35378	5.49446	8.09875	9.64749
									198.9	18.1962	19.2449	12.9276	14.3708	5.90486	6.48995	7.44283	9.96128
									198.8	18.7087	18.7126	12.8138	14.3621	6.01967	6.28932	7.09978	9.6075
									198.7	19.2501	19.5224	14.4225	14.0896	5.98579	6.9502	7.19802	10.0595
									198.6	20.0551	20.7658	15.3385	13.1739	5.87459	7.66059	7.01129	9.19868
									198.5	21.0113	21.0652	15.7864	13.6499	6.49041	7.77682	7.08773	8.22894
									198.4	21.4543	20.2856	16.8494	12.662	6.41614	8.73821	8.91533	8.75934
									198.3	22.2227	20.7288	18.4784	13.3001	7.01784	8.50423	8.9287	9.93841
									198.2	22.9936	20.8545	17.7949	13.3444	7.00237	9.05111	9.15984	10.6889
									198.1	23.0302	21.6994	18.1345	14.3417	6.41518	8.0329	10.1381	11.3199
									198	23.0909	21.6172	17.9667	14.0131	6.03133	8.00335	10.0098	10.7839
									197.9	23.6475	22.271	17.0635	14.4778	6.85094	8.62717	10.6748	11.0751
									197.8	23.6429	21.1794	17.8822	14.0383	7.03994	8.84029	10.7237	9.62462
									197.7	24.0641	23.0646	18.3602	14.6207	7.30425	7.85898	9.84994	9.20942
									197.6	24.6362	23.1718	18.4448	14.8567	7.0981	7.5233	8.87331	9.08205
									197.5	24.67	22.5004	19.5892	15.3994	7.91074	8.12683	7.94075	7.68476
									197.4	23.8133	21.7009	19.7268	14.554	7.74758	7.57663	9.51218	8.03649
									197.3	24.7872	22.5716	18.774	13.9085	8.10269	9.20791	8.90605	7.78761
									197.2	25.5467	23.5826	20.0421	15.7855	8.79804	8.85269	7.85313	6.35217
									197.1	25.5614	23.7375	19.8868	15.5718	8.11051	8.20275	9.90284	6.89901
									197	26.0072	23.8433	19.9206	15.3173	8.33344	6.99266	8.1379	5.38838
									196.9	25.986	23.6769	21.3631	16.7141	9.07911	6.91299	7.4132	6.23061
									196.8	27.2531	22.276	22.2466	17.3342	9.06128	6.65601	8.93823	4.97199
									196.7	27.5268	20.9383	21.9398	17.2396	8.73118	7.21614	10.5898	4.26407
									196.6	27.6278	20.4531	22.2976	17.2579	7.57249	8.43166	10.1434	2.59646
									196.5	26.4839	20.5072	22.5921	17.2352	8.36791	8.0596	9.51375	3.71336
									196.4	26.6113	21.3671	22.6704	16.5035	8.58556	7.10503	8.932	3.71527
									196.3	26.4141	21.3981	22.4626	17.4318	8.29287	8.21452	8.70993	3.98961
									196.2	27.3937	20.3312	22.8897	16.5461	7.82832	9.11712	6.32266	3.52222
									196.1	27.1552	20.6955	20.9734	16.3481	6.7103	9.0151	5.63759	3.67199
									196	26.6935	20.2891	21.215	17.0596	6.8479	8.67561	4.83196	4.12128
									195.9	26.765	20.4071	21.2576	17.4062	7.37432	8.13501	5.21024	4.09716
									195.8	25.8359	21.0178	21.2997	16.8763	6.84105	7.18662	4.65628	5.99021
									195.7	27.2994	21.5983	20.0565	15.8103	7.79681	6.64547	4.25931	6.22584
									195.6	27.1638	21.3002	20.0671	14.5047	6.94151	6.33734	3.97499	6.8409
									195.5	27.1151	21.4495	20.0823	14.108	6.56564	5.52034	4.4861	4.4951
									195.4	27.0119	21.3483	19.8213	14.5196	6.81239	5.41141	4.63678	4.63944
									195.3	25.6536	20.3424	19.4598	14.3574	6.50414	4.74981	6.01719	3.12221
									195.2	26.0299	20.8459	18.0143	13.2152	6.92765	4.01134	5.21974	3.14548
									195.1	25.8575	21.2112	16.7081	12.7983	7.61123	3.39883	3.73968	1.97993
									195	25.1104	21.2272	16.017	12.8055	7.93499	5.22704	3.19541	2.01089

## Sheet: aBCLXL
Notes:
For the GuHCl melt, three scans were performed per sample.
Temperature scans were performed once per construct.
Guanidinium melt						Temperature melt			Wavelength scans at temps
[GuHCl]	mdeg (222 nm)	% folded	Average %	StdDev %		Temperature	mdeg (222 nm)			mdeg (222 nm)								25C (after melt)
0	-18.078	98.5438	100	1.40155		22.04	-17.2043		Wavelength	20°C	30°C	40°C	50°C	60°C	70°C	80°C	90°C	Wavelength	mdeg (222 nm)
0	-18.5909	101.34				24.08	-17.2379		260	0.148998	0.161517	0.148521	0.293283	0.0712889	0.251611	0.0148265	0.0671565	260	0.401985
0	-18.3665	100.116				24.63	-17.6798		259.9	0.166758	0.161624	0.159105	0.281748	0.0713786	0.223928	-0.0436526	0.0364763	259	0.0942982
0.5	-19.1576	104.429	104.518	1.8318		26.07	-16.8905		259.8	0.161849	0.170126	0.161376	0.298878	0.0760371	0.199734	-0.0484724	0.0385106	258	0.234432
0.5	-18.8463	102.732				28.07	-17.0215		259.7	0.184338	0.149547	0.161904	0.272493	0.0647175	0.179946	-0.0860536	0.0197812	257	0.104809
0.5	-19.5178	106.392				30.09	-17.4566		259.6	0.231447	0.117163	0.192093	0.302321	0.051448	0.175872	-0.0548833	0.00467382	256	0.367907
1	-19.4569	106.06	106.995	0.819608		32.05	-17.1718		259.5	0.214101	0.159426	0.206913	0.300455	0.0378912	0.192562	-0.0259436	-0.0136457	255	0.3112
1	-19.7377	107.591				34.09	-16.9436		259.4	0.204835	0.191131	0.235673	0.306032	0.0377307	0.194807	-0.0368137	0.0196016	254	0.000659249
1	-19.6905	107.334				36.1	-16.9044		259.3	0.182577	0.156075	0.230958	0.331656	0.0621097	0.18525	-0.0316446	-0.00064878	253	-0.182653
1.5	-18.2976	99.7409	99.4482	0.290832		38.05	-16.6139		259.2	0.163715	0.161228	0.225614	0.290524	0.0656663	0.174281	-0.0287915	0.0158519	252	-0.0154325
1.5	-18.1909	99.1593				40.04	-16.3265		259.1	0.200022	0.194724	0.22387	0.264692	0.0356464	0.134993	-0.0423117	-0.024951	251	0.264646
1.5	-18.2432	99.4444				42.09	-16.3386		259	0.204268	0.150443	0.239661	0.259802	0.0295931	0.136486	-0.0669084	-0.00960365	250	0.371195
2	-14.1129	76.9299	76.6111	0.595318		44.12	-16.0259		258.9	0.18627	0.137067	0.275519	0.246176	0.0552203	0.094075	-0.0802633	0.00519764	249	0.119248
2	-13.9284	75.9242				46.06	-16.0871		258.8	0.210884	0.129174	0.252968	0.251709	0.0724947	0.102909	-0.0952982	-0.0463369	248	-0.230534
2	-14.1219	76.979				48.06	-15.8526		258.7	0.224672	0.141938	0.288053	0.234711	0.105853	0.120393	-0.108233	-0.0410486	247	-0.389158
2.5	-3.12819	17.0519	17.6735	1.20065		50.07	-15.5292		258.6	0.257124	0.119763	0.254497	0.223804	0.096921	0.119498	-0.0891187	-0.0632975	246	-0.257406
2.5	-3.10236	16.9111				52.1	-15.1351		258.5	0.25404	0.0977599	0.30967	0.227229	0.0994904	0.121784	-0.0831828	-0.0182816	245	0.0193343
2.5	-3.49612	19.0575				54.09	-14.8265		258.4	0.266138	0.15876	0.313522	0.200204	0.0945108	0.143923	-0.0337091	-0.00243672	244	-0.269985
3	-2.17832	11.8741	10.9241	0.851477		56.03	-13.7458		258.3	0.274069	0.193363	0.306959	0.235473	0.108801	0.148892	-0.0679141	0.0158539	243	-0.479473
3	-1.87666	10.2297				58.07	-13.0228		258.2	0.301134	0.145936	0.25569	0.237123	0.0963097	0.186962	-0.026457	0.00955287	242	-0.530885
3	-1.95713	10.6684				60.07	-11.6808		258.1	0.284477	0.125556	0.297489	0.246504	0.0928754	0.174496	-0.0275146	-0.00670616	241	-0.878264
3.5	-1.26843	6.91426	5.76687	1.0863		62.09	-9.42424		258	0.303126	0.128265	0.273425	0.220032	0.0839693	0.151397	-0.0355633	0.00567431	240	-1.54212
3.5	-1.03322	5.63212				64.1	-8.36242		257.9	0.322895	0.125637	0.265092	0.182024	0.0763189	0.123767	0.0162381	0.0164259	239	-1.81422
3.5	-0.87217	4.75423				66.08	-7.14126		257.8	0.307578	0.131982	0.249545	0.146146	0.0764249	0.117464	0.0321307	-0.0289456	238	-2.40647
4	-0.851885	4.64366	4.67769	0.393221		68.07	-5.92454		257.7	0.316421	0.137378	0.277984	0.149724	0.0982724	0.134943	0.054282	0.00825263	237	-3.01682
4	-0.789317	4.3026				70.04	-5.29639		257.6	0.326323	0.146427	0.35296	0.152164	0.113432	0.14553	0.0597301	0.0196917	236	-3.83695
4	-0.933185	5.08683				72.09	-4.92348		257.5	0.336938	0.162779	0.357798	0.145086	0.0935939	0.10091	0.0700587	0.021676	235	-4.89152
4.5	-0.140853	0.767795	2.57307	1.61198		74.1	-4.46518		257.4	0.353343	0.123255	0.298375	0.141623	0.090445	0.0598013	0.0657655	0.00559875	234	-5.97859
4.5	-0.709663	3.8684				76.09	-4.09241		257.3	0.358375	0.124456	0.31223	0.118021	0.082235	0.0709323	0.0427397	0.00614224	233	-7.13435
4.5	-0.565584	3.08302				78.08	-3.66195		257.2	0.333653	0.124041	0.342016	0.104239	0.113614	0.0775881	0.0824106	-0.00631238	232	-8.17279
5	-0.504709	2.75119	2.1175	0.608703		80.08	-3.73752		257.1	0.324599	0.140438	0.361908	0.148289	0.151338	0.0590021	0.056134	-0.0246964	231	-9.47552
5	-0.378645	2.06401				82.07	-3.66879		257	0.325955	0.137007	0.370209	0.132994	0.125203	0.0486173	0.0236577	-0.0374912	230	-10.7271
5	-0.282022	1.53731				84.07	-3.90612		256.9	0.35445	0.143102	0.376569	0.124728	0.117548	0.0459356	0.0572293	-0.0391258	229	-11.893
5.5	0.00223646	-0.012191	-0.278672	0.230779		86.1	-3.3708		256.8	0.346261	0.16776	0.341997	0.120139	0.10373	0.0700806	0.0288576	-0.0488746	228	-13.1489
5.5	0.0755659	-0.411913				88.1	-3.32347		256.7	0.346564	0.17164	0.28559	0.138588	0.074099	0.024249	-0.00575469	-0.0596491	227	-13.911
5.5	0.0755659	-0.411913				90.03	-3.57473		256.6	0.32321	0.18862	0.267663	0.121564	0.0954226	0.0126348	0.0344577	-0.015239	226	-14.6454
6	-0.0465189	0.253576	1.57441	1.23724		92.09	-2.99572		256.5	0.334614	0.170595	0.266152	0.112332	0.102524	0.00644474	0.0633389	-0.0577265	225	-15.4847
6	-0.323484	1.76332				94.03	-3.28258		256.4	0.329863	0.19126	0.258958	0.0823056	0.078192	-0.00677366	0.0444195	-0.0909144	224	-16.2282
6	-0.496478	2.70632				96.07	-2.91333		256.3	0.361491	0.197973	0.267451	0.061129	0.114452	-0.00474789	0.0403046	-0.0491977	223	-16.6418
									256.2	0.365477	0.198386	0.277474	0.0504408	0.0823361	-0.0438023	0.0240918	-0.0569744	222	-16.7938
									256.1	0.374203	0.189355	0.245792	0.0327431	0.0770398	-0.0698068	0.015548	-0.0560692	221	-16.4548
									256	0.388642	0.140438	0.242189	0.035936	0.0609876	-0.0767977	0.0157908	-0.0883252	220	-16.5474
									255.9	0.386894	0.20705	0.243099	0.0690187	0.0854741	-0.0519105	0.038266	-0.0903065	219	-16.4954
									255.8	0.350154	0.251337	0.29565	0.0925882	0.128175	-0.0469371	-0.00113855	-0.077623	218	-15.9834
									255.7	0.357023	0.235872	0.315189	0.0918284	0.132959	-0.0579356	-0.00703587	-0.072197	217	-15.8933
									255.6	0.355124	0.248161	0.29381	0.0595172	0.0920378	-0.0671212	0.0348859	-0.0770597	216	-15.6132
									255.5	0.362394	0.257277	0.291511	0.0362014	0.105166	-0.0508083	0.0354194	-0.0891597	215	-15.3607
									255.4	0.368932	0.260166	0.317975	0.0132774	0.104801	-0.0569696	0.0386993	-0.0809638	214	-15.212
									255.3	0.345844	0.239475	0.312746	0.0249298	0.111481	-0.0984891	0.0598471	-0.0659302	213	-15.5429
									255.2	0.321542	0.287824	0.340351	0.0576954	0.130915	-0.138978	0.0701511	-0.0920182	212	-15.691
									255.1	0.331464	0.272266	0.392125	0.0687681	0.139491	-0.197531	0.062381	-0.073109	211	-15.8738
									255	0.339248	0.22234	0.362819	0.0469019	0.139474	-0.248063	0.0740812	-0.0293447	210	-16.1967
									254.9	0.331005	0.252024	0.357744	0.072301	0.131102	-0.245294	0.0928613	-0.039877	209	-16.4851
									254.8	0.32532	0.2493	0.326188	0.0541876	0.11735	-0.208558	0.0918281	-0.0681621	208	-16.1411
									254.7	0.382143	0.239545	0.348922	0.0405163	0.124558	-0.232404	0.107764	-0.0573542	207	-15.44
									254.6	0.338031	0.235864	0.354094	0.0823417	0.126089	-0.247125	0.111696	-0.0502723	206	-14.4945
									254.5	0.315998	0.268202	0.343404	0.0517186	0.140382	-0.245377	0.110579	-0.0599657	205	-12.3623
									254.4	0.344173	0.238649	0.364432	0.0727333	0.117842	-0.255077	0.151362	-0.0255526	204	-9.73847
									254.3	0.289257	0.225694	0.354862	0.0904509	0.112698	-0.222601	0.17723	-0.0670118	203	-6.91799
									254.2	0.26662	0.236774	0.358673	0.137144	0.0969832	-0.231183	0.217516	-0.0459337	202	-2.76214
									254.1	0.30622	0.236257	0.346882	0.136716	0.0653359	-0.259536	0.197995	-0.0626172	201	0.531068
									254	0.302783	0.265944	0.381785	0.141653	0.104282	-0.209095	0.175496	-0.0792672	200	4.2035
									253.9	0.284722	0.271485	0.352576	0.151535	0.0954635	-0.18514	0.156776	-0.0636462	199	9.49047
									253.8	0.270527	0.241829	0.342004	0.154394	0.0960703	-0.165188	0.156047	-0.0581333	198	14.8936
									253.7	0.25995	0.229154	0.367448	0.154746	0.0668547	-0.105726	0.157063	-0.0880363	197	20.338
									253.6	0.259932	0.209059	0.36639	0.186434	0.0517584	-0.116225	0.156015	-0.100926	196	23.2974
									253.5	0.246693	0.13235	0.365146	0.183866	0.0474166	-0.110682	0.134209	-0.136728	195	26.7703
									253.4	0.242298	0.138515	0.38027	0.195353	0.0509731	-0.148646	0.137339	-0.135744
									253.3	0.213347	0.1101	0.401511	0.243968	0.052569	-0.147616	0.156192	-0.0938426
									253.2	0.223375	0.106675	0.442716	0.220406	-0.0162182	-0.0919157	0.170449	-0.0942105
									253.1	0.222998	0.114191	0.415882	0.183068	-0.0773207	-0.116778	0.12022	-0.0910521
									253	0.20413	0.11543	0.380777	0.185141	-0.0771327	-0.0820706	0.12234	-0.090584
									252.9	0.185045	0.138446	0.354199	0.184466	-0.0820048	-0.0445292	0.129533	-0.0931762
									252.8	0.138412	0.175605	0.308341	0.210983	-0.048339	0.0199327	0.177692	-0.122519
									252.7	0.139985	0.160318	0.319163	0.157841	-0.032883	-0.022468	0.189047	-0.062435
									252.6	0.148318	0.178179	0.327757	0.153406	-0.0536868	0.00138751	0.179323	-0.079794
									252.5	0.170847	0.175964	0.338892	0.173802	-0.0854745	0.0324604	0.145528	-0.0809255
									252.4	0.14536	0.226482	0.299312	0.181753	-0.0934924	0.000163229	0.131773	-0.118499
									252.3	0.173364	0.234368	0.303312	0.200164	-0.0633833	-0.00669042	0.159973	-0.132009
									252.2	0.186355	0.284075	0.309215	0.241225	-0.0365646	-0.00822112	0.187222	-0.120838
									252.1	0.195586	0.262666	0.311043	0.256203	-0.0855666	-0.00938259	0.180341	-0.138796
									252	0.162169	0.247968	0.311596	0.282331	-0.0932887	-0.0232907	0.173033	-0.116338
									251.9	0.173741	0.215389	0.327366	0.260543	-0.097529	-0.0373381	0.166489	-0.111301
									251.8	0.190651	0.245769	0.343832	0.258629	-0.100035	-0.0474667	0.203513	-0.0456543
									251.7	0.22358	0.258134	0.313898	0.233666	-0.0643106	-0.0673451	0.169531	-0.0522177
									251.6	0.223307	0.292284	0.299921	0.236432	-0.0502722	-0.0529188	0.194604	-0.0485569
									251.5	0.197723	0.335168	0.336601	0.289971	-0.0640224	-0.0751254	0.21079	-0.048429
									251.4	0.16169	0.347756	0.342982	0.26401	-0.0684714	-0.0866712	0.210622	-0.0420392
									251.3	0.189727	0.311116	0.298563	0.265063	-0.0579873	-0.115792	0.172672	-0.022317
									251.2	0.194423	0.236153	0.245892	0.218437	-0.0901907	-0.132956	0.170431	-0.0355998
									251.1	0.210418	0.266885	0.249452	0.213639	-0.0788508	-0.131974	0.12744	-0.0254989
									251	0.207627	0.250905	0.28452	0.235106	-0.0680693	-0.128368	0.115891	-0.0347276
									250.9	0.186656	0.190688	0.281041	0.204752	-0.0610137	-0.08321	0.108726	-0.00131452
									250.8	0.185319	0.17287	0.248777	0.210213	-0.0194886	-0.0422216	0.124289	-0.00875718
									250.7	0.174278	0.200043	0.224795	0.2031	-0.0560585	-0.0369011	0.150435	-0.02565
									250.6	0.155089	0.177453	0.230033	0.201296	-0.08611	-0.0085463	0.147333	-0.0101202
									250.5	0.160501	0.198236	0.23898	0.185567	-0.102956	-0.0128279	0.139403	0.00420326
									250.4	0.163128	0.201088	0.199803	0.197663	-0.11483	-0.00987066	0.154206	-0.0358433
									250.3	0.178043	0.174663	0.174236	0.173142	-0.0749935	-0.0424673	0.142627	-0.054968
									250.2	0.149207	0.145225	0.171164	0.173555	-0.0949707	-0.0233742	0.120199	-0.112662
									250.1	0.172185	0.129529	0.163874	0.147776	-0.0659611	-0.0495639	0.120877	-0.126862
									250	0.154896	0.147693	0.156389	0.113111	-0.0848795	-0.0836265	0.121673	-0.127514
									249.9	0.145785	0.159455	0.143594	0.10864	-0.0963005	-0.0657023	0.081547	-0.145139
									249.8	0.128093	0.136813	0.13327	0.106415	-0.123929	-0.0847421	0.101241	-0.163037
									249.7	0.138645	0.140264	0.137928	0.128455	-0.106147	-0.0853986	0.0665826	-0.165014
									249.6	0.13121	0.104135	0.181071	0.115802	-0.098466	-0.104703	0.0313246	-0.1392
									249.5	0.154631	0.108448	0.160325	0.113958	-0.150589	-0.136588	0.0160279	-0.135385
									249.4	0.141921	0.106947	0.111875	0.0836995	-0.143287	-0.144034	-0.0011625	-0.12945
									249.3	0.104916	0.0810053	0.0967199	0.0773229	-0.141533	-0.109408	-0.0115945	-0.0791634
									249.2	0.0750032	0.0961195	0.112403	0.0712958	-0.161498	-0.0915118	-0.028131	-0.0620764
									249.1	0.0283862	0.106004	0.0917779	0.0875445	-0.175546	-0.110888	-0.0183277	-0.0407078
									249	0.0291333	0.0642459	0.0709532	0.0872262	-0.196822	-0.175565	-0.0324449	-0.0349597
									248.9	0.0537813	0.06	0.0408159	0.0430759	-0.238375	-0.149822	-0.0113727	0.00674885
									248.8	0.0178101	0.0768101	0.0107667	0.0383483	-0.260757	-0.120703	-0.013692	0.0452715
									248.7	0.00656869	0.0613791	0.014256	0.0380149	-0.252577	-0.147492	0.00232397	0.0379225
									248.6	8.50994e-05	0.0584546	0.0496428	-0.0336007	-0.266794	-0.143449	0.027032	0.0396257
									248.5	-0.0106832	0.0495572	0.0763916	-0.0522917	-0.246968	-0.147532	0.00360351	0.0346446
									248.4	0.00666206	0.0689669	0.0811487	-0.0119607	-0.284372	-0.17944	-0.040524	0.0291121
									248.3	0.00931866	0.0844447	0.0949357	-0.0227815	-0.294266	-0.205311	-0.0524758	0.00786161
									248.2	0.0288155	0.0500382	0.0920041	0.0102371	-0.294374	-0.215926	-0.0938762	0.012861
									248.1	0.00665183	0.0312437	0.128005	-0.00268473	-0.299389	-0.212612	-0.0957298	0.0262906
									248	-0.0105317	0.0155457	0.112193	-0.00104486	-0.317929	-0.177414	-0.0956063	0.0255477
									247.9	-0.0534303	0.0368385	0.102211	0.00134744	-0.290814	-0.200022	-0.0985575	-0.00353577
									247.8	-0.0372427	0.0309096	0.135651	-0.0496144	-0.273994	-0.175986	-0.0868747	0.0403409
									247.7	-0.0693465	0.015576	0.154731	-0.0491084	-0.299545	-0.201097	-0.120345	0.00451159
									247.6	-0.0470505	-0.0260146	0.0659476	-0.0499591	-0.282246	-0.195109	-0.117385	0.021876
									247.5	-0.0416444	-0.0148508	0.0691016	-0.0337344	-0.312057	-0.183523	-0.132546	0.0252837
									247.4	-0.0214989	-0.0288781	0.0390664	0.0119368	-0.319511	-0.167275	-0.151383	0.0345376
									247.3	-0.0307589	-0.0478725	-0.0264345	0.0339425	-0.333929	-0.171887	-0.182562	0.0488189
									247.2	-0.0211282	-0.0932635	-0.0659999	0.0599971	-0.356129	-0.171762	-0.213052	0.0278452
									247.1	-0.0405294	-0.0874818	-0.0587678	0.0124696	-0.359717	-0.130521	-0.203913	0.0274954
									247	-0.0575165	-0.130333	-0.0975889	-0.027114	-0.366571	-0.0857817	-0.20146	0.0545584
									246.9	-0.0437307	-0.186267	-0.130865	-0.0659761	-0.395522	-0.0918573	-0.233187	0.0190571
									246.8	-0.115287	-0.190637	-0.115686	-0.0733631	-0.376004	-0.0947199	-0.257941	-0.0178136
									246.7	-0.147748	-0.19338	-0.141411	-0.120164	-0.36554	-0.116498	-0.276528	-0.0109222
									246.6	-0.160533	-0.175427	-0.139323	-0.129578	-0.344886	-0.0948003	-0.278054	-0.0021625
									246.5	-0.18629	-0.157042	-0.142963	-0.167567	-0.365409	-0.0858785	-0.319658	-0.00475841
									246.4	-0.177067	-0.14862	-0.156628	-0.210098	-0.386469	-0.0774654	-0.332927	0.0118667
									246.3	-0.185132	-0.192339	-0.134012	-0.196838	-0.39453	-0.0735568	-0.36598	-0.011653
									246.2	-0.155512	-0.173044	-0.126478	-0.229981	-0.400432	-0.040642	-0.395545	-0.00851273
									246.1	-0.113406	-0.210182	-0.14159	-0.218743	-0.397089	-0.0821033	-0.415321	-0.0249563
									246	-0.138321	-0.214091	-0.206792	-0.20156	-0.422969	-0.0825546	-0.441537	-0.0304259
									245.9	-0.128578	-0.254426	-0.228112	-0.245191	-0.462816	-0.0208274	-0.434003	-0.0479421
									245.8	-0.11284	-0.233122	-0.232563	-0.253083	-0.478693	-0.0995116	-0.418617	-0.037337
									245.7	-0.137981	-0.26932	-0.191199	-0.326266	-0.498649	-0.119845	-0.424702	-0.0426707
									245.6	-0.154882	-0.307317	-0.228227	-0.326233	-0.494873	-0.113477	-0.426292	-0.0804234
									245.5	-0.140277	-0.287826	-0.247258	-0.318878	-0.466862	-0.144789	-0.414932	-0.0963087
									245.4	-0.163687	-0.308358	-0.231866	-0.359684	-0.475961	-0.163201	-0.479497	-0.103876
									245.3	-0.175787	-0.293505	-0.234316	-0.387213	-0.455545	-0.155511	-0.442916	-0.111438
									245.2	-0.205461	-0.317876	-0.301472	-0.432102	-0.555645	-0.183518	-0.43896	-0.0949018
									245.1	-0.226592	-0.310456	-0.287665	-0.470052	-0.568587	-0.198766	-0.488917	-0.137011
									245	-0.186113	-0.266253	-0.329799	-0.487774	-0.52679	-0.215407	-0.512218	-0.135411
									244.9	-0.216279	-0.296386	-0.397601	-0.507663	-0.542021	-0.216535	-0.492922	-0.163346
									244.8	-0.255786	-0.280683	-0.358602	-0.542549	-0.504532	-0.225768	-0.478762	-0.148147
									244.7	-0.230274	-0.294522	-0.362407	-0.536586	-0.513206	-0.224306	-0.488972	-0.176282
									244.6	-0.257972	-0.328284	-0.388646	-0.567134	-0.505569	-0.257697	-0.516804	-0.144129
									244.5	-0.267685	-0.336388	-0.399585	-0.587329	-0.518314	-0.267106	-0.484278	-0.197272
									244.4	-0.282473	-0.324113	-0.400973	-0.637241	-0.474404	-0.276078	-0.519316	-0.17849
									244.3	-0.312677	-0.39511	-0.404871	-0.64484	-0.485254	-0.295403	-0.531871	-0.154507
									244.2	-0.359854	-0.426341	-0.424072	-0.669175	-0.471996	-0.335132	-0.536484	-0.184162
									244.1	-0.349663	-0.48651	-0.43174	-0.651212	-0.505764	-0.347455	-0.542458	-0.184885
									244	-0.336996	-0.503987	-0.424262	-0.688335	-0.481548	-0.367866	-0.567462	-0.172762
									243.9	-0.349342	-0.560088	-0.397418	-0.695256	-0.476464	-0.337436	-0.537339	-0.199823
									243.8	-0.365261	-0.584547	-0.421003	-0.72791	-0.454653	-0.332819	-0.559697	-0.185945
									243.7	-0.330543	-0.632748	-0.440552	-0.736433	-0.431189	-0.344214	-0.564006	-0.182538
									243.6	-0.358227	-0.643138	-0.446611	-0.725491	-0.460366	-0.343135	-0.587609	-0.185351
									243.5	-0.395661	-0.685125	-0.512469	-0.762201	-0.471313	-0.345273	-0.619415	-0.237817
									243.4	-0.424175	-0.723025	-0.553567	-0.763775	-0.489616	-0.310743	-0.613004	-0.23335
									243.3	-0.442045	-0.763993	-0.578676	-0.790152	-0.541295	-0.347887	-0.643967	-0.267881
									243.2	-0.388035	-0.828354	-0.667195	-0.856587	-0.550572	-0.358059	-0.683016	-0.276899
									243.1	-0.44737	-0.873577	-0.708398	-0.841064	-0.565064	-0.350807	-0.703763	-0.260445
									243	-0.481041	-0.873864	-0.741202	-0.887394	-0.55186	-0.364464	-0.723659	-0.312653
									242.9	-0.520154	-0.859955	-0.765222	-0.924924	-0.550172	-0.361292	-0.685915	-0.38453
									242.8	-0.512271	-0.909414	-0.769039	-0.964778	-0.581105	-0.396189	-0.633655	-0.413297
									242.7	-0.542599	-0.935374	-0.802901	-0.982728	-0.603029	-0.416813	-0.623004	-0.414783
									242.6	-0.529656	-0.945949	-0.832134	-0.994716	-0.643669	-0.443313	-0.630946	-0.433099
									242.5	-0.560577	-0.972175	-0.857571	-1.04529	-0.663015	-0.513439	-0.639184	-0.43112
									242.4	-0.567394	-0.999093	-0.868632	-1.07421	-0.671294	-0.527198	-0.667315	-0.416854
									242.3	-0.572249	-0.988815	-0.895065	-1.11496	-0.696263	-0.57525	-0.65596	-0.422724
									242.2	-0.642713	-1.05516	-0.924331	-1.1344	-0.705601	-0.592996	-0.646308	-0.443399
									242.1	-0.683299	-1.12248	-0.914309	-1.15689	-0.705902	-0.617184	-0.622189	-0.419671
									242	-0.728781	-1.16266	-0.991308	-1.1466	-0.725434	-0.611143	-0.644439	-0.403282
									241.9	-0.774958	-1.189	-1.01555	-1.18015	-0.707445	-0.659002	-0.679716	-0.385444
									241.8	-0.806803	-1.18441	-1.03801	-1.17898	-0.7591	-0.648939	-0.681767	-0.361016
									241.7	-0.802989	-1.22285	-1.0804	-1.16922	-0.802291	-0.671595	-0.682322	-0.3566
									241.6	-0.856705	-1.2633	-1.08585	-1.18337	-0.824588	-0.700985	-0.676407	-0.372017
									241.5	-0.888327	-1.29561	-1.10307	-1.22946	-0.877366	-0.673604	-0.703989	-0.329604
									241.4	-0.913962	-1.35467	-1.11701	-1.29164	-0.860348	-0.686583	-0.701083	-0.378979
									241.3	-0.933139	-1.363	-1.17961	-1.31525	-0.922176	-0.709657	-0.693274	-0.474626
									241.2	-0.995074	-1.36722	-1.25247	-1.3463	-0.954976	-0.666139	-0.709403	-0.493356
									241.1	-1.01333	-1.41601	-1.24382	-1.34211	-0.95987	-0.692459	-0.733336	-0.508351
									241	-1.04539	-1.47358	-1.27935	-1.33785	-0.996266	-0.714585	-0.744564	-0.58577
									240.9	-1.09856	-1.51605	-1.37811	-1.3716	-1.01291	-0.717002	-0.765912	-0.618941
									240.8	-1.09871	-1.57254	-1.40207	-1.38644	-1.01253	-0.731551	-0.769322	-0.65069
									240.7	-1.11035	-1.57261	-1.47048	-1.45164	-1.04543	-0.70177	-0.831084	-0.658528
									240.6	-1.1415	-1.57596	-1.50218	-1.4909	-1.06132	-0.70513	-0.806293	-0.678556
									240.5	-1.17783	-1.62612	-1.53127	-1.58104	-1.09989	-0.722286	-0.815703	-0.732289
									240.4	-1.24568	-1.68005	-1.5896	-1.62942	-1.11797	-0.736563	-0.823366	-0.730937
									240.3	-1.34171	-1.72238	-1.68408	-1.65108	-1.13551	-0.761057	-0.809019	-0.729855
									240.2	-1.42658	-1.78937	-1.73634	-1.6682	-1.18358	-0.768878	-0.81304	-0.773431
									240.1	-1.47847	-1.79313	-1.75703	-1.73704	-1.24389	-0.741515	-0.764642	-0.78695
									240	-1.53398	-1.82416	-1.8044	-1.78367	-1.28317	-0.690953	-0.76011	-0.788371
									239.9	-1.59703	-1.87982	-1.87772	-1.8856	-1.27523	-0.703611	-0.75216	-0.833912
									239.8	-1.69609	-1.94435	-1.96803	-1.91737	-1.30553	-0.759893	-0.796438	-0.86696
									239.7	-1.74539	-1.99228	-2.05145	-1.97874	-1.33725	-0.775686	-0.803316	-0.910343
									239.6	-1.78505	-2.03388	-2.12484	-2.03294	-1.3929	-0.764095	-0.825607	-0.882076
									239.5	-1.84124	-2.08355	-2.18374	-2.05277	-1.4464	-0.765495	-0.851025	-0.889259
									239.4	-1.9042	-2.15795	-2.22342	-2.11116	-1.49937	-0.790873	-0.841218	-0.884572
									239.3	-1.96117	-2.17876	-2.23897	-2.16329	-1.55759	-0.793109	-0.840888	-0.927577
									239.2	-2.00345	-2.28037	-2.282	-2.20976	-1.57468	-0.849831	-0.816942	-0.939705
									239.1	-2.08071	-2.37293	-2.32887	-2.29067	-1.63209	-0.874612	-0.854729	-0.956978
									239	-2.15293	-2.38454	-2.29959	-2.3886	-1.62788	-0.936352	-0.852763	-0.996159
									238.9	-2.1881	-2.46275	-2.30234	-2.45324	-1.65335	-0.968638	-0.855174	-1.048
									238.8	-2.22788	-2.45794	-2.33176	-2.4984	-1.7035	-0.986456	-0.851798	-0.995825
									238.7	-2.31091	-2.49747	-2.38055	-2.54949	-1.7363	-1.01726	-0.901105	-1.07386
									238.6	-2.36502	-2.57817	-2.42838	-2.59369	-1.77439	-1.03331	-0.91635	-1.13732
									238.5	-2.4436	-2.60507	-2.47998	-2.65924	-1.81875	-1.04907	-0.876798	-1.12858
									238.4	-2.45517	-2.62388	-2.5199	-2.69384	-1.86551	-1.0595	-0.903873	-1.12533
									238.3	-2.46594	-2.68801	-2.57284	-2.71496	-1.89312	-1.08383	-0.890186	-1.15701
									238.2	-2.5371	-2.80252	-2.61692	-2.75786	-1.93737	-1.12755	-0.921444	-1.16985
									238.1	-2.63985	-2.84975	-2.6891	-2.79903	-1.97898	-1.16999	-0.869806	-1.19999
									238	-2.71882	-2.94016	-2.75046	-2.84241	-2.01589	-1.22141	-0.923787	-1.26139
									237.9	-2.79742	-2.95915	-2.80397	-2.88053	-2.06168	-1.24094	-0.922249	-1.30312
									237.8	-2.89314	-3.02892	-2.89732	-2.98907	-2.1069	-1.27159	-0.920416	-1.33084
									237.7	-2.93706	-3.06075	-2.99954	-3.06032	-2.16528	-1.2955	-0.926489	-1.32589
									237.6	-3.02949	-3.11003	-3.01231	-3.13682	-2.19088	-1.31483	-0.925537	-1.32684
									237.5	-3.1333	-3.15529	-3.05644	-3.20321	-2.21112	-1.34831	-0.962533	-1.35043
									237.4	-3.20867	-3.22782	-3.0997	-3.26246	-2.24018	-1.37509	-0.984882	-1.37577
									237.3	-3.29591	-3.28156	-3.18094	-3.31598	-2.27518	-1.34694	-1.00622	-1.38635
									237.2	-3.3784	-3.34642	-3.27325	-3.31768	-2.30355	-1.34563	-1.03005	-1.42977
									237.1	-3.4335	-3.38914	-3.36688	-3.44035	-2.3699	-1.3725	-1.04222	-1.41038
									237	-3.55695	-3.4579	-3.47318	-3.52398	-2.40695	-1.38389	-1.04187	-1.38122
									236.9	-3.64661	-3.51059	-3.59175	-3.55285	-2.45952	-1.38315	-1.07277	-1.41884
									236.8	-3.71934	-3.62303	-3.68677	-3.61815	-2.49901	-1.41379	-1.09031	-1.44422
									236.7	-3.76705	-3.74898	-3.77276	-3.64802	-2.51145	-1.45543	-1.10728	-1.4664
									236.6	-3.83196	-3.8197	-3.82538	-3.68289	-2.58734	-1.49307	-1.12914	-1.5168
									236.5	-3.94962	-3.93704	-3.88835	-3.72964	-2.61081	-1.52321	-1.12262	-1.5379
									236.4	-4.04191	-4.03074	-3.93339	-3.81067	-2.68131	-1.57143	-1.14859	-1.53712
									236.3	-4.16216	-4.1498	-4.03279	-3.91838	-2.75164	-1.63029	-1.18312	-1.60556
									236.2	-4.18669	-4.22114	-4.08105	-3.99087	-2.8073	-1.65804	-1.21489	-1.60028
									236.1	-4.28828	-4.33479	-4.15572	-4.01681	-2.87634	-1.65368	-1.23643	-1.65804
									236	-4.37701	-4.43294	-4.25616	-4.07663	-2.93979	-1.65502	-1.27667	-1.70527
									235.9	-4.47778	-4.51414	-4.36237	-4.10196	-2.9907	-1.70861	-1.27262	-1.7699
									235.8	-4.58306	-4.54487	-4.44199	-4.22609	-3.05692	-1.73092	-1.26751	-1.78005
									235.7	-4.64819	-4.64596	-4.53962	-4.30302	-3.11543	-1.71845	-1.30477	-1.79389
									235.6	-4.72535	-4.74854	-4.6312	-4.36865	-3.17898	-1.75531	-1.31475	-1.7982
									235.5	-4.83853	-4.84648	-4.75778	-4.44722	-3.23222	-1.77301	-1.34777	-1.79131
									235.4	-4.91565	-4.92202	-4.84438	-4.54516	-3.30754	-1.79566	-1.36	-1.78584
									235.3	-4.97924	-4.99018	-4.94202	-4.65121	-3.35093	-1.84049	-1.30213	-1.81149
									235.2	-5.05463	-5.02926	-5.02566	-4.7113	-3.39909	-1.87613	-1.29402	-1.85359
									235.1	-5.18924	-5.07657	-5.11942	-4.81741	-3.48004	-1.9637	-1.25821	-1.88489
									235	-5.27288	-5.16694	-5.22437	-4.94125	-3.5517	-2.00262	-1.3185	-1.8823
									234.9	-5.40474	-5.22924	-5.28302	-5.05193	-3.61217	-2.01712	-1.35698	-1.92653
									234.8	-5.50906	-5.31659	-5.39905	-5.16184	-3.68968	-2.06708	-1.36616	-1.97817
									234.7	-5.62409	-5.39464	-5.48527	-5.21033	-3.7543	-2.08682	-1.36753	-1.95344
									234.6	-5.75731	-5.42067	-5.53477	-5.30095	-3.84006	-2.13689	-1.38117	-1.96618
									234.5	-5.82799	-5.55394	-5.62528	-5.38136	-3.91712	-2.17581	-1.39335	-1.94576
									234.4	-5.89558	-5.65972	-5.72679	-5.41569	-4.00962	-2.19859	-1.43845	-1.96427
									234.3	-6.0133	-5.75039	-5.82063	-5.44141	-4.0541	-2.20815	-1.49059	-1.94614
									234.2	-6.0838	-5.85621	-5.92724	-5.52115	-4.13354	-2.21665	-1.55892	-2.00106
									234.1	-6.21924	-5.87033	-6.00249	-5.58629	-4.23898	-2.23411	-1.57776	-1.99775
									234	-6.31921	-5.98627	-6.1232	-5.7078	-4.3389	-2.22491	-1.63534	-2.02388
									233.9	-6.38417	-6.10639	-6.26867	-5.77074	-4.43124	-2.22506	-1.67583	-2.03313
									233.8	-6.48414	-6.25601	-6.37571	-5.86493	-4.46586	-2.23672	-1.73459	-2.06176
									233.7	-6.56811	-6.3255	-6.44243	-5.94659	-4.51928	-2.26981	-1.74685	-2.09223
									233.6	-6.63618	-6.43063	-6.51551	-6.03039	-4.63513	-2.29275	-1.73884	-2.15789
									233.5	-6.72539	-6.54254	-6.64181	-6.16652	-4.70591	-2.31289	-1.7704	-2.18329
									233.4	-6.80135	-6.57138	-6.74101	-6.24565	-4.78922	-2.33847	-1.74763	-2.25256
									233.3	-6.92488	-6.68043	-6.84245	-6.32598	-4.89092	-2.38606	-1.70604	-2.30934
									233.2	-7.10918	-6.7851	-6.96327	-6.47168	-4.9466	-2.42628	-1.7697	-2.34313
									233.1	-7.24393	-6.87524	-7.03978	-6.57875	-5.00392	-2.42002	-1.82231	-2.37444
									233	-7.33162	-6.9593	-7.12064	-6.63647	-5.05013	-2.45087	-1.82595	-2.431
									232.9	-7.44657	-7.05863	-7.3068	-6.72891	-5.18304	-2.52499	-1.89554	-2.48398
									232.8	-7.55298	-7.16662	-7.43823	-6.78395	-5.24307	-2.50774	-1.96324	-2.47126
									232.7	-7.6476	-7.30385	-7.55275	-6.89613	-5.30584	-2.57585	-1.98292	-2.47774
									232.6	-7.81191	-7.46859	-7.72489	-7.02699	-5.44074	-2.66339	-1.99609	-2.48939
									232.5	-7.9065	-7.54905	-7.85884	-7.17575	-5.54304	-2.6998	-2.01914	-2.45711
									232.4	-8.02967	-7.64408	-7.92285	-7.27432	-5.56736	-2.71344	-2.03428	-2.48002
									232.3	-8.15165	-7.7977	-8.05822	-7.41572	-5.67865	-2.72642	-2.07947	-2.50071
									232.2	-8.31289	-7.90501	-8.15162	-7.54471	-5.74833	-2.74824	-2.08994	-2.47197
									232.1	-8.46316	-8.03004	-8.26162	-7.64145	-5.84654	-2.84413	-2.12513	-2.48114
									232	-8.53033	-8.09326	-8.37535	-7.75038	-5.91474	-2.89652	-2.16374	-2.48675
									231.9	-8.6471	-8.2191	-8.48934	-7.81093	-5.99328	-2.91139	-2.17309	-2.50984
									231.8	-8.77477	-8.33878	-8.59128	-7.95518	-6.02198	-2.92557	-2.2231	-2.55148
									231.7	-8.84154	-8.44382	-8.66985	-8.01147	-6.05896	-3.00864	-2.24181	-2.57091
									231.6	-8.92397	-8.54377	-8.76106	-8.12387	-6.14362	-3.03391	-2.25162	-2.59591
									231.5	-9.00622	-8.78993	-8.92607	-8.26606	-6.2255	-3.09672	-2.25896	-2.59523
									231.4	-9.15142	-8.87389	-9.03036	-8.40616	-6.31455	-3.16254	-2.27165	-2.59859
									231.3	-9.29146	-8.957	-9.15206	-8.51572	-6.40484	-3.18147	-2.25328	-2.57869
									231.2	-9.41522	-9.05321	-9.25926	-8.64054	-6.44754	-3.19632	-2.27972	-2.60599
									231.1	-9.50667	-9.16032	-9.3719	-8.72191	-6.48964	-3.24611	-2.27615	-2.63003
									231	-9.61301	-9.24642	-9.48847	-8.80832	-6.52003	-3.30108	-2.32249	-2.65897
									230.9	-9.69475	-9.31222	-9.55901	-8.89334	-6.53893	-3.34792	-2.36966	-2.66826
									230.8	-9.79544	-9.43728	-9.71081	-9.00853	-6.57022	-3.35113	-2.39124	-2.68058
									230.7	-9.93772	-9.57427	-9.84005	-9.17378	-6.67329	-3.39916	-2.45658	-2.73252
									230.6	-10.0657	-9.68608	-9.96463	-9.25825	-6.73461	-3.44917	-2.46685	-2.7387
									230.5	-10.1736	-9.78593	-10.1353	-9.33889	-6.85802	-3.42137	-2.47514	-2.74316
									230.4	-10.2838	-9.90726	-10.2815	-9.4529	-6.93697	-3.43045	-2.52885	-2.76974
									230.3	-10.4264	-10.0453	-10.3942	-9.52643	-6.98841	-3.4467	-2.54673	-2.80428
									230.2	-10.5249	-10.1744	-10.5182	-9.62724	-7.05989	-3.47581	-2.57125	-2.8055
									230.1	-10.6042	-10.2694	-10.6708	-9.73923	-7.12362	-3.52857	-2.60244	-2.76413
									230	-10.7162	-10.3775	-10.7546	-9.82997	-7.15522	-3.54704	-2.59109	-2.79262
									229.9	-10.8757	-10.5191	-10.8792	-10.0482	-7.25383	-3.61343	-2.61436	-2.81838
									229.8	-11.0358	-10.6005	-11.0419	-10.1614	-7.34185	-3.66875	-2.64652	-2.8055
									229.7	-11.1283	-10.7615	-11.1622	-10.2529	-7.42266	-3.72426	-2.67912	-2.81613
									229.6	-11.2388	-10.8605	-11.3019	-10.4193	-7.472	-3.68164	-2.68614	-2.8259
									229.5	-11.3342	-10.9949	-11.4116	-10.5175	-7.52053	-3.73591	-2.68874	-2.83578
									229.4	-11.4384	-11.1434	-11.4777	-10.5591	-7.61092	-3.79615	-2.70058	-2.79465
									229.3	-11.5878	-11.2673	-11.5556	-10.638	-7.70201	-3.80302	-2.70631	-2.83632
									229.2	-11.7119	-11.4351	-11.6704	-10.7405	-7.76806	-3.85389	-2.80152	-2.83989
									229.1	-11.8267	-11.5872	-11.8057	-10.8574	-7.87716	-3.87681	-2.83703	-2.84648
									229	-11.8959	-11.6695	-11.9381	-10.9407	-7.91728	-3.92328	-2.88218	-2.84202
									228.9	-12.0369	-11.8426	-12.045	-11.0691	-7.98535	-3.96652	-2.8835	-2.83153
									228.8	-12.1365	-11.9819	-12.1182	-11.1888	-8.03049	-3.98227	-2.87027	-2.85221
									228.7	-12.2162	-12.1079	-12.1931	-11.268	-8.12538	-4.05077	-2.87406	-2.86765
									228.6	-12.3156	-12.264	-12.2455	-11.3565	-8.18469	-4.02614	-2.88186	-2.94316
									228.5	-12.3788	-12.3975	-12.3399	-11.46	-8.2478	-4.051	-2.86906	-3.00131
									228.4	-12.5024	-12.4644	-12.3981	-11.5512	-8.32504	-4.11015	-2.92521	-3.00607
									228.3	-12.6255	-12.5332	-12.4898	-11.6373	-8.4245	-4.09076	-2.92139	-3.01122
									228.2	-12.7656	-12.651	-12.592	-11.7731	-8.49382	-4.08899	-2.94289	-2.98799
									228.1	-12.8622	-12.766	-12.6885	-11.8453	-8.54419	-4.13639	-2.96916	-2.98206
									228	-13.0222	-12.9243	-12.8575	-11.9584	-8.64937	-4.09341	-2.99294	-2.99418
									227.9	-13.1065	-13.0168	-12.9813	-12.061	-8.69331	-4.10693	-3.01666	-2.93735
									227.8	-13.1966	-13.0889	-13.0605	-12.1298	-8.73709	-4.16564	-3.01153	-2.93892
									227.7	-13.256	-13.2086	-13.0909	-12.2586	-8.79784	-4.18802	-3.04037	-2.88457
									227.6	-13.3434	-13.3607	-13.2028	-12.3558	-8.84391	-4.14542	-3.07588	-2.86838
									227.5	-13.4199	-13.4501	-13.2702	-12.4174	-8.92834	-4.18353	-3.11578	-2.87224
									227.4	-13.5651	-13.5787	-13.3828	-12.5368	-8.95792	-4.18848	-3.12339	-2.86301
									227.3	-13.6518	-13.6864	-13.4411	-12.6143	-9.0047	-4.2077	-3.1513	-2.90305
									227.2	-13.7497	-13.7899	-13.5151	-12.719	-9.08103	-4.24288	-3.15183	-2.96122
									227.1	-13.8927	-13.9032	-13.5662	-12.7785	-9.18831	-4.29756	-3.15923	-3.00846
									227	-13.9946	-13.9995	-13.6942	-12.8757	-9.22261	-4.36538	-3.23297	-3.0536
									226.9	-14.0585	-14.1368	-13.8033	-12.9699	-9.32955	-4.31565	-3.22674	-3.08815
									226.8	-14.1501	-14.2539	-13.8699	-13.0144	-9.37648	-4.30496	-3.24161	-3.0957
									226.7	-14.2544	-14.3538	-13.9191	-13.0818	-9.42707	-4.36145	-3.26548	-3.12172
									226.6	-14.3467	-14.4333	-14.0058	-13.1311	-9.45016	-4.36581	-3.2333	-3.12439
									226.5	-14.4279	-14.4886	-14.0563	-13.2005	-9.43295	-4.40671	-3.25808	-3.17157
									226.4	-14.5377	-14.6254	-14.123	-13.3029	-9.50604	-4.38814	-3.27573	-3.14466
									226.3	-14.6139	-14.7312	-14.1956	-13.3739	-9.54468	-4.41894	-3.26863	-3.15517
									226.2	-14.7242	-14.7866	-14.3314	-13.4599	-9.56511	-4.42767	-3.29769	-3.20202
									226.1	-14.8494	-14.8469	-14.4237	-13.557	-9.68938	-4.47192	-3.26871	-3.22049
									226	-14.9487	-14.9206	-14.4863	-13.6759	-9.69962	-4.47574	-3.25539	-3.19732
									225.9	-14.9743	-14.9922	-14.5588	-13.7444	-9.69023	-4.48149	-3.2712	-3.18114
									225.8	-15.0519	-15.1117	-14.656	-13.8329	-9.67615	-4.51044	-3.23288	-3.22121
									225.7	-15.1814	-15.1826	-14.7383	-13.9164	-9.71933	-4.54635	-3.23658	-3.19229
									225.6	-15.2938	-15.2687	-14.7663	-13.9706	-9.76853	-4.57119	-3.25361	-3.21451
									225.5	-15.3337	-15.3316	-14.8294	-14.0516	-9.80455	-4.64966	-3.25553	-3.20056
									225.4	-15.4918	-15.3776	-14.9742	-14.1363	-9.81291	-4.68956	-3.35224	-3.18165
									225.3	-15.5856	-15.4589	-15.053	-14.2047	-9.85821	-4.71121	-3.42005	-3.19315
									225.2	-15.5983	-15.5236	-15.0872	-14.2603	-9.84855	-4.70861	-3.4545	-3.17917
									225.1	-15.5942	-15.5996	-15.1776	-14.2811	-9.88192	-4.75571	-3.47893	-3.14889
									225	-15.6867	-15.6466	-15.2077	-14.3874	-9.9269	-4.75094	-3.46512	-3.13905
									224.9	-15.7523	-15.7167	-15.2885	-14.4707	-9.97554	-4.75951	-3.45746	-3.17998
									224.8	-15.8041	-15.7701	-15.3632	-14.5269	-10.0238	-4.79655	-3.49187	-3.22054
									224.7	-15.891	-15.8011	-15.3597	-14.5906	-10.0252	-4.78487	-3.49094	-3.18045
									224.6	-15.9248	-15.8502	-15.3945	-14.6849	-10.069	-4.85092	-3.48552	-3.20944
									224.5	-15.9719	-15.926	-15.458	-14.7496	-10.0668	-4.8496	-3.47975	-3.16717
									224.4	-16.002	-15.9826	-15.5103	-14.7633	-10.0862	-4.87529	-3.46753	-3.20967
									224.3	-16.1035	-16.0208	-15.513	-14.7939	-10.0746	-4.8745	-3.45636	-3.18622
									224.2	-16.1788	-16.1325	-15.5209	-14.8818	-10.0486	-4.88152	-3.41466	-3.21651
									224.1	-16.245	-16.1366	-15.5803	-14.9112	-10.1339	-4.87972	-3.46492	-3.24033
									224	-16.2616	-16.1903	-15.6358	-14.955	-10.1097	-4.90855	-3.4769	-3.25211
									223.9	-16.2342	-16.2217	-15.7232	-15.0297	-10.1101	-4.88775	-3.47124	-3.32269
									223.8	-16.2937	-16.3064	-15.7457	-15.0184	-10.1396	-4.88466	-3.51896	-3.31183
									223.7	-16.3427	-16.3778	-15.7513	-15.025	-10.1692	-4.91474	-3.51288	-3.34443
									223.6	-16.371	-16.4198	-15.764	-15.027	-10.2225	-4.96297	-3.51823	-3.32258
									223.5	-16.4031	-16.3942	-15.7886	-15.0504	-10.2848	-4.96865	-3.52557	-3.31358
									223.4	-16.4276	-16.4069	-15.7867	-15.0441	-10.2572	-4.96817	-3.58286	-3.30691
									223.3	-16.4455	-16.4082	-15.7618	-15.0731	-10.2804	-5.01122	-3.6104	-3.32715
									223.2	-16.4489	-16.449	-15.7985	-15.0276	-10.2688	-5.02435	-3.6279	-3.35926
									223.1	-16.4417	-16.5172	-15.8181	-15.019	-10.2487	-5.06859	-3.68701	-3.36094
									223	-16.5182	-16.5879	-15.7987	-15.0676	-10.286	-5.0563	-3.65631	-3.33544
									222.9	-16.5665	-16.6322	-15.8466	-15.1526	-10.288	-5.03819	-3.69121	-3.35286
									222.8	-16.5933	-16.7166	-15.8243	-15.1922	-10.3196	-4.99741	-3.6853	-3.36333
									222.7	-16.6474	-16.7793	-15.8837	-15.2095	-10.3572	-5.01076	-3.66125	-3.32629
									222.6	-16.649	-16.8	-15.8688	-15.1941	-10.4048	-5.04282	-3.69021	-3.31954
									222.5	-16.6658	-16.7894	-15.8948	-15.2281	-10.4116	-5.02756	-3.66447	-3.33033
									222.4	-16.6171	-16.8012	-15.8803	-15.2029	-10.4327	-5.0019	-3.73563	-3.33251
									222.3	-16.659	-16.7826	-15.8664	-15.2003	-10.4432	-5.00752	-3.71362	-3.3428
									222.2	-16.7004	-16.8158	-15.8776	-15.1902	-10.4702	-5.02084	-3.7261	-3.38859
									222.1	-16.7072	-16.8428	-15.8898	-15.2246	-10.5209	-5.04679	-3.7278	-3.33982
									222	-16.7253	-16.82	-15.9062	-15.259	-10.5241	-5.10358	-3.71804	-3.35325
									221.9	-16.7849	-16.854	-15.898	-15.2809	-10.5261	-5.08945	-3.73001	-3.35412
									221.8	-16.7886	-16.8709	-15.9043	-15.2427	-10.6086	-5.07844	-3.76009	-3.40309
									221.7	-16.8261	-16.8884	-15.9009	-15.1501	-10.6155	-5.04886	-3.79595	-3.36304
									221.6	-16.8039	-16.8523	-15.899	-15.1653	-10.5919	-4.98669	-3.78394	-3.3752
									221.5	-16.8574	-16.911	-15.9527	-15.2001	-10.5964	-5.02288	-3.77924	-3.42347
									221.4	-16.9045	-16.8834	-15.9436	-15.1743	-10.6022	-5.0433	-3.82514	-3.4165
									221.3	-16.8576	-16.8874	-15.9545	-15.1788	-10.6592	-5.04432	-3.83782	-3.41572
									221.2	-16.8609	-16.8794	-15.9521	-15.1775	-10.6899	-4.98244	-3.84365	-3.43795
									221.1	-16.817	-16.8705	-15.9856	-15.1323	-10.6889	-5	-3.81532	-3.44922
									221	-16.8241	-16.8465	-15.9603	-15.1813	-10.6319	-5.00218	-3.77653	-3.46844
									220.9	-16.8428	-16.7931	-15.9231	-15.1729	-10.6472	-4.98532	-3.78711	-3.47277
									220.8	-16.8332	-16.8254	-15.9283	-15.1839	-10.6739	-4.9154	-3.74378	-3.4805
									220.7	-16.8557	-16.8535	-15.9097	-15.1993	-10.7324	-4.97184	-3.721	-3.51804
									220.6	-16.8615	-16.8394	-15.8854	-15.1951	-10.7398	-5.02019	-3.76804	-3.55857
									220.5	-16.8849	-16.7998	-15.8737	-15.2128	-10.7394	-5.03831	-3.79968	-3.53593
									220.4	-16.8928	-16.8053	-15.8604	-15.2138	-10.7061	-5.04562	-3.86292	-3.59812
									220.3	-16.8918	-16.7836	-15.8909	-15.2573	-10.7125	-5.08004	-3.86835	-3.53589
									220.2	-16.9254	-16.7681	-15.8311	-15.2571	-10.7635	-5.03572	-3.89351	-3.47714
									220.1	-16.9135	-16.8035	-15.8284	-15.2857	-10.7221	-5.04728	-3.84513	-3.50562
									220	-16.8803	-16.8324	-15.8342	-15.3019	-10.7191	-5.05685	-3.85478	-3.5049
									219.9	-16.8891	-16.8606	-15.8594	-15.3054	-10.7124	-5.08508	-3.8706	-3.52277
									219.8	-16.8598	-16.7847	-15.8626	-15.2996	-10.6906	-5.07072	-3.84213	-3.58334
									219.7	-16.8212	-16.7566	-15.8321	-15.2509	-10.7176	-5.08768	-3.87192	-3.5807
									219.6	-16.8053	-16.7486	-15.7973	-15.2248	-10.7027	-5.11482	-3.89921	-3.59227
									219.5	-16.8729	-16.7448	-15.8161	-15.2296	-10.7002	-5.11896	-3.89585	-3.64375
									219.4	-16.8583	-16.7195	-15.8605	-15.2463	-10.7332	-5.17385	-3.90453	-3.70608
									219.3	-16.8505	-16.6697	-15.827	-15.2141	-10.7711	-5.22527	-3.8942	-3.72837
									219.2	-16.8595	-16.644	-15.8543	-15.2176	-10.7576	-5.23537	-3.85172	-3.74749
									219.1	-16.7967	-16.5983	-15.8195	-15.1927	-10.7545	-5.24289	-3.85812	-3.75191
									219	-16.7582	-16.5482	-15.7663	-15.1981	-10.7238	-5.24374	-3.8597	-3.67889
									218.9	-16.7337	-16.5029	-15.7554	-15.1755	-10.7089	-5.17775	-3.81559	-3.6835
									218.8	-16.6887	-16.4958	-15.7268	-15.1493	-10.7013	-5.15808	-3.78515	-3.64209
									218.7	-16.659	-16.4529	-15.6983	-15.1347	-10.7397	-5.13003	-3.8158	-3.62052
									218.6	-16.6675	-16.462	-15.6347	-15.1158	-10.7103	-5.09302	-3.80123	-3.6271
									218.5	-16.6698	-16.4297	-15.6501	-15.0998	-10.6818	-5.10442	-3.85616	-3.60613
									218.4	-16.6386	-16.3969	-15.6284	-15.0841	-10.6891	-5.1404	-3.8615	-3.59691
									218.3	-16.6179	-16.3363	-15.6485	-15.0385	-10.6644	-5.11572	-3.89465	-3.57064
									218.2	-16.5919	-16.3622	-15.6051	-15.0636	-10.714	-5.0896	-3.94004	-3.54276
									218.1	-16.5158	-16.3396	-15.6194	-15.0523	-10.7513	-5.02898	-3.95293	-3.53081
									218	-16.4952	-16.3124	-15.5846	-15.0351	-10.7273	-5.04603	-3.98708	-3.62014
									217.9	-16.4918	-16.2896	-15.5637	-15.0496	-10.7376	-5.03195	-4.03917	-3.60839
									217.8	-16.4692	-16.2671	-15.4827	-15.0328	-10.7224	-5.03481	-4.05908	-3.63982
									217.7	-16.4486	-16.2588	-15.4514	-15.0174	-10.7015	-5.05758	-4.11217	-3.60522
									217.6	-16.4405	-16.2374	-15.4177	-15.0249	-10.7383	-5.04156	-4.15732	-3.66607
									217.5	-16.4754	-16.2308	-15.3879	-14.9478	-10.7323	-5.07322	-4.1546	-3.65024
									217.4	-16.4899	-16.1779	-15.4175	-14.927	-10.7384	-5.08349	-4.15816	-3.69773
									217.3	-16.5248	-16.1811	-15.4067	-14.898	-10.7235	-5.05861	-4.15824	-3.70637
									217.2	-16.5105	-16.1781	-15.3963	-14.9066	-10.7329	-5.0938	-4.14461	-3.6974
									217.1	-16.5285	-16.158	-15.355	-14.8833	-10.7708	-5.0642	-4.14295	-3.6495
									217	-16.4663	-16.2037	-15.3435	-14.8941	-10.779	-5.06844	-4.11912	-3.64516
									216.9	-16.4937	-16.1998	-15.3239	-14.8719	-10.7749	-5.06416	-4.11616	-3.61059
									216.8	-16.4997	-16.1558	-15.3235	-14.8887	-10.7965	-5.07931	-4.12633	-3.63215
									216.7	-16.4627	-16.1919	-15.3476	-14.867	-10.8022	-5.09688	-4.13301	-3.66824
									216.6	-16.4679	-16.2227	-15.356	-14.8434	-10.7803	-5.10106	-4.14508	-3.73193
									216.5	-16.4309	-16.2691	-15.3321	-14.8129	-10.7978	-5.14039	-4.1284	-3.67686
									216.4	-16.3921	-16.2521	-15.3161	-14.8131	-10.7886	-5.09943	-4.17008	-3.66443
									216.3	-16.334	-16.2839	-15.3104	-14.7905	-10.7292	-5.13022	-4.1285	-3.63089
									216.2	-16.3436	-16.2384	-15.3113	-14.784	-10.7323	-5.09292	-4.15496	-3.62548
									216.1	-16.3489	-16.2266	-15.2764	-14.7779	-10.7749	-5.08889	-4.20628	-3.64649
									216	-16.3238	-16.2126	-15.2209	-14.7965	-10.7627	-5.09116	-4.23429	-3.63102
									215.9	-16.2751	-16.2261	-15.1708	-14.8061	-10.7771	-5.12516	-4.23684	-3.64708
									215.8	-16.2342	-16.2262	-15.2019	-14.718	-10.7848	-5.1042	-4.31157	-3.65959
									215.7	-16.2044	-16.1949	-15.1768	-14.6993	-10.7946	-5.09674	-4.26744	-3.65016
									215.6	-16.1668	-16.2411	-15.1813	-14.6834	-10.8128	-5.07964	-4.24435	-3.65818
									215.5	-16.2157	-16.2098	-15.0976	-14.6773	-10.8239	-5.15546	-4.27985	-3.66715
									215.4	-16.2373	-16.2042	-15.1404	-14.697	-10.836	-5.15286	-4.24396	-3.68565
									215.3	-16.2156	-16.155	-15.1436	-14.7082	-10.8483	-5.12785	-4.30454	-3.68976
									215.2	-16.2133	-16.1877	-15.1454	-14.7288	-10.8726	-5.15301	-4.2894	-3.73402
									215.1	-16.2036	-16.1687	-15.1858	-14.7461	-10.8764	-5.09841	-4.27892	-3.75189
									215	-16.1878	-16.1719	-15.2596	-14.7601	-10.906	-5.07711	-4.23633	-3.72509
									214.9	-16.21	-16.1928	-15.2891	-14.7398	-10.9238	-5.04442	-4.25076	-3.75604
									214.8	-16.209	-16.1708	-15.3019	-14.7926	-10.9551	-5.056	-4.28872	-3.73743
									214.7	-16.2159	-16.2346	-15.3177	-14.8406	-10.9588	-5.01777	-4.30051	-3.72948
									214.6	-16.1559	-16.172	-15.2726	-14.8392	-10.9852	-5.0939	-4.29525	-3.77217
									214.5	-16.1497	-16.1602	-15.2794	-14.8763	-11.0232	-5.14247	-4.30574	-3.81878
									214.4	-16.1452	-16.0964	-15.2118	-14.843	-11.0954	-5.16728	-4.31731	-3.83416
									214.3	-16.0823	-16.0833	-15.2349	-14.85	-11.1011	-5.2238	-4.28008	-3.89474
									214.2	-16.1104	-16.052	-15.2839	-14.8726	-11.0859	-5.23535	-4.273	-3.96164
									214.1	-16.1083	-16.0434	-15.2709	-14.8461	-11.062	-5.25957	-4.25086	-3.9805
									214	-16.2274	-16.0726	-15.3138	-14.899	-11.0569	-5.33321	-4.2406	-3.98408
									213.9	-16.1621	-16.0947	-15.2836	-14.8901	-11.0687	-5.34582	-4.23554	-3.91691
									213.8	-16.161	-16.0916	-15.2858	-14.9435	-11.0567	-5.34708	-4.23786	-3.91192
									213.7	-16.2274	-16.0507	-15.3088	-14.9817	-11.0995	-5.36019	-4.32696	-3.9744
									213.6	-16.1769	-16.0824	-15.3317	-15.0273	-11.1182	-5.32117	-4.37749	-4.02179
									213.5	-16.1463	-16.0617	-15.3841	-15.0076	-11.1468	-5.42326	-4.35185	-4.00076
									213.4	-16.1585	-16.036	-15.434	-15.0636	-11.1714	-5.42228	-4.38515	-4.0318
									213.3	-16.1035	-16.074	-15.4801	-15.0903	-11.2399	-5.42715	-4.37509	-4.09016
									213.2	-16.0873	-16.1233	-15.4802	-15.126	-11.2795	-5.45382	-4.43549	-4.11833
									213.1	-16.0329	-16.0842	-15.4464	-15.1146	-11.2805	-5.44386	-4.39367	-4.13384
									213	-16.0516	-16.0974	-15.4404	-15.1433	-11.3506	-5.46677	-4.36756	-4.09623
									212.9	-16.0541	-16.1226	-15.452	-15.148	-11.3668	-5.51637	-4.42515	-4.07872
									212.8	-16.0671	-16.1242	-15.4652	-15.2277	-11.3545	-5.551	-4.46876	-4.03553
									212.7	-16.1717	-16.1383	-15.4859	-15.2807	-11.3335	-5.59314	-4.53751	-4.12566
									212.6	-16.1647	-16.1379	-15.4698	-15.2992	-11.3645	-5.64019	-4.5777	-4.09855
									212.5	-16.1639	-16.2085	-15.5654	-15.2736	-11.3854	-5.70396	-4.60907	-4.13873
									212.4	-16.2182	-16.1828	-15.6081	-15.2681	-11.3518	-5.71113	-4.66881	-4.17616
									212.3	-16.2513	-16.1899	-15.6355	-15.2729	-11.3147	-5.72619	-4.6944	-4.18592
									212.2	-16.2257	-16.2171	-15.7258	-15.2569	-11.3539	-5.76759	-4.7169	-4.22418
									212.1	-16.2334	-16.2408	-15.7826	-15.2227	-11.3709	-5.77018	-4.75629	-4.25278
									212	-16.2908	-16.225	-15.7705	-15.2216	-11.4234	-5.78863	-4.75079	-4.26254
									211.9	-16.3346	-16.2146	-15.7939	-15.2659	-11.4423	-5.8327	-4.81941	-4.37299
									211.8	-16.4004	-16.2349	-15.8436	-15.2986	-11.4441	-5.88261	-4.80731	-4.41585
									211.7	-16.3897	-16.2877	-15.8568	-15.3163	-11.4611	-5.86944	-4.816	-4.45772
									211.6	-16.3815	-16.2224	-15.8918	-15.317	-11.4618	-5.95971	-4.85796	-4.50973
									211.5	-16.3902	-16.1956	-15.9028	-15.3722	-11.4655	-6.04346	-4.871	-4.54175
									211.4	-16.4015	-16.2625	-15.9156	-15.3704	-11.4666	-6.07058	-4.90213	-4.5364
									211.3	-16.4123	-16.2765	-15.9484	-15.3773	-11.4681	-6.14524	-4.96198	-4.60434
									211.2	-16.3756	-16.3354	-15.9365	-15.3532	-11.5024	-6.15307	-4.99814	-4.61514
									211.1	-16.3604	-16.3274	-15.8893	-15.3326	-11.5281	-6.13241	-5.05299	-4.60501
									211	-16.4191	-16.3358	-15.8469	-15.3757	-11.5089	-6.15923	-5.08508	-4.61005
									210.9	-16.382	-16.3274	-15.8833	-15.4326	-11.4921	-6.21188	-5.08189	-4.66814
									210.8	-16.4309	-16.326	-15.8771	-15.4695	-11.489	-6.26492	-5.15327	-4.71638
									210.7	-16.4541	-16.3018	-15.9464	-15.4811	-11.5339	-6.29621	-5.17269	-4.79071
									210.6	-16.4866	-16.3352	-15.9904	-15.5042	-11.6063	-6.42211	-5.26454	-4.83223
									210.5	-16.4633	-16.3426	-16.0049	-15.5892	-11.609	-6.47843	-5.27435	-4.93618
									210.4	-16.417	-16.3861	-16.0336	-15.5683	-11.5781	-6.54273	-5.35929	-4.9301
									210.3	-16.4206	-16.3917	-16.1106	-15.5762	-11.6425	-6.5923	-5.43858	-4.8761
									210.2	-16.4103	-16.413	-16.054	-15.5941	-11.6644	-6.68908	-5.50319	-4.93418
									210.1	-16.3465	-16.4136	-16.0761	-15.628	-11.6432	-6.65344	-5.54871	-4.94715
									210	-16.3059	-16.4321	-16.0913	-15.5635	-11.7324	-6.71311	-5.53297	-4.98296
									209.9	-16.3725	-16.4379	-16.0877	-15.5235	-11.7043	-6.76456	-5.51858	-5.02314
									209.8	-16.3939	-16.3704	-15.9937	-15.5189	-11.7147	-6.85941	-5.54328	-4.98969
									209.7	-16.3825	-16.3386	-16.0846	-15.5054	-11.7027	-6.92865	-5.55901	-5.02006
									209.6	-16.3624	-16.3152	-16.092	-15.4547	-11.6551	-6.95029	-5.54167	-5.10611
									209.5	-16.3221	-16.345	-16.0537	-15.4651	-11.6478	-7.01155	-5.54691	-5.15928
									209.4	-16.3051	-16.3418	-16.0252	-15.4728	-11.6611	-7.0562	-5.65128	-5.20867
									209.3	-16.2237	-16.2698	-15.9824	-15.4896	-11.6635	-7.08503	-5.72222	-5.20647
									209.2	-16.1051	-16.2631	-15.9353	-15.4356	-11.7257	-7.09764	-5.77647	-5.18355
									209.1	-16.0854	-16.2247	-15.8796	-15.404	-11.6828	-7.10975	-5.77054	-5.2807
									209	-16.0157	-16.1312	-15.8553	-15.2942	-11.6804	-7.07665	-5.86229	-5.34707
									208.9	-15.9428	-16.0773	-15.8472	-15.2016	-11.646	-7.08776	-5.94345	-5.50552
									208.8	-15.9462	-16.0124	-15.8057	-15.1383	-11.5969	-7.06343	-5.95459	-5.54151
									208.7	-15.8954	-15.9837	-15.7598	-15.0725	-11.6007	-7.08735	-5.93151	-5.62446
									208.6	-15.8455	-15.9609	-15.6925	-14.9739	-11.5321	-7.09173	-5.98788	-5.59786
									208.5	-15.8319	-15.8815	-15.6011	-14.9599	-11.5457	-7.12559	-5.99913	-5.62136
									208.4	-15.7579	-15.8403	-15.5217	-14.9564	-11.5316	-7.12719	-6.02089	-5.56065
									208.3	-15.7501	-15.7594	-15.5013	-14.906	-11.5424	-7.10624	-6.19876	-5.57141
									208.2	-15.6527	-15.6633	-15.4601	-14.8855	-11.5031	-7.14429	-6.26887	-5.58742
									208.1	-15.6629	-15.6471	-15.4201	-14.8525	-11.5422	-7.15681	-6.28402	-5.60376
									208	-15.6036	-15.5913	-15.3694	-14.7267	-11.5329	-7.18843	-6.329	-5.63773
									207.9	-15.5397	-15.6016	-15.2475	-14.68	-11.538	-7.14585	-6.31844	-5.71927
									207.8	-15.4387	-15.4868	-15.1591	-14.5449	-11.5343	-7.1332	-6.18596	-5.76439
									207.7	-15.4195	-15.3539	-15.1377	-14.504	-11.4541	-7.17538	-6.18958	-5.8493
									207.6	-15.3446	-15.1817	-15.0337	-14.4061	-11.4408	-7.21489	-6.23398	-5.88801
									207.5	-15.2524	-15.1041	-14.9517	-14.2768	-11.3912	-7.29787	-6.22771	-5.802
									207.4	-15.1344	-15.0058	-14.9188	-14.2281	-11.354	-7.39896	-6.27464	-5.84844
									207.3	-15.0733	-14.8455	-14.7932	-14.1688	-11.2972	-7.46835	-6.2919	-5.90599
									207.2	-14.9805	-14.7892	-14.7562	-14.1	-11.1883	-7.52462	-6.4011	-5.97898
									207.1	-14.8781	-14.6462	-14.6207	-13.9947	-11.1318	-7.47458	-6.47986	-6.0102
									207	-14.7453	-14.5844	-14.4972	-13.8349	-11.0817	-7.57731	-6.56611	-5.9966
									206.9	-14.6131	-14.4609	-14.3897	-13.7726	-11.097	-7.71175	-6.48767	-6.12079
									206.8	-14.4906	-14.408	-14.2073	-13.6716	-11.0812	-7.67602	-6.58862	-6.07883
									206.7	-14.4057	-14.2896	-14.0771	-13.4648	-11.027	-7.73873	-6.64432	-6.18872
									206.6	-14.3403	-14.2009	-14.0131	-13.3651	-10.9748	-7.72916	-6.75125	-6.07558
									206.5	-14.2191	-14.0216	-13.8013	-13.1743	-10.9132	-7.76695	-6.76318	-6.11341
									206.4	-14.0883	-13.8205	-13.7063	-13.1029	-10.8514	-7.71886	-6.80481	-6.05647
									206.3	-13.9726	-13.6452	-13.5737	-12.9278	-10.7484	-7.74147	-6.86846	-6.06514
									206.2	-13.8079	-13.4822	-13.4409	-12.7898	-10.5936	-7.72748	-7.04536	-5.98328
									206.1	-13.5776	-13.2983	-13.2233	-12.6085	-10.5566	-7.64504	-6.88344	-5.92517
									206	-13.4423	-13.1515	-12.9755	-12.3204	-10.4913	-7.59941	-6.90778	-6.03638
									205.9	-13.2171	-12.9373	-12.7178	-12.0819	-10.4242	-7.58583	-6.90647	-6.24179
									205.8	-12.9703	-12.7564	-12.492	-11.9228	-10.2147	-7.50035	-6.81884	-6.30986
									205.7	-12.7792	-12.5318	-12.298	-11.7977	-10.1135	-7.47658	-6.79833	-6.30838
									205.6	-12.6357	-12.2744	-12.0748	-11.507	-10.076	-7.52688	-6.90669	-6.30461
									205.5	-12.4458	-12.1142	-11.8204	-11.2329	-9.92132	-7.60149	-6.8021	-6.39298
									205.4	-12.3031	-11.9395	-11.6731	-11.0499	-9.75088	-7.48846	-6.71812	-6.52947
									205.3	-12.0698	-11.6831	-11.4518	-10.8627	-9.51038	-7.5605	-6.59156	-6.54525
									205.2	-11.9224	-11.4562	-11.2366	-10.5961	-9.33459	-7.59903	-6.76381	-6.70275
									205.1	-11.8067	-11.2567	-11.0855	-10.4282	-9.21978	-7.65509	-6.72854	-6.89487
									205	-11.6087	-11.0981	-10.8972	-10.2309	-9.17324	-7.72807	-6.94107	-6.96693
									204.9	-11.4387	-10.9403	-10.7557	-10.1117	-9.14447	-7.58536	-6.95164	-7.1229
									204.8	-11.3003	-10.7493	-10.5436	-9.83366	-9.07224	-7.52373	-6.95178	-7.36492
									204.7	-11.1054	-10.4962	-10.3185	-9.57885	-8.92402	-7.37271	-6.94503	-7.78003
									204.6	-10.9597	-10.3071	-10.149	-9.41518	-8.86529	-7.35591	-6.68374	-7.88389
									204.5	-10.7452	-10.1351	-9.97558	-9.27818	-8.74234	-7.40899	-6.50409	-7.41643
									204.4	-10.5431	-9.95419	-9.70987	-9.08394	-8.57543	-7.33224	-6.30873	-7.26316
									204.3	-10.3023	-9.65861	-9.45912	-8.85658	-8.43536	-7.22974	-6.32054	-6.85358
									204.2	-10.0454	-9.5191	-9.16729	-8.6986	-8.26944	-7.39613	-6.03006	-6.39993
									204.1	-9.67198	-9.18289	-8.91974	-8.32955	-8.10884	-7.45688	-6.22225	-5.66925
									204	-9.37959	-8.91847	-8.67324	-8.17021	-7.818	-7.17971	-6.21488	-5.03476
									203.9	-9.17956	-8.58666	-8.33076	-7.74996	-7.81824	-7.14304	-6.37383	-5.17522
									203.8	-8.8792	-8.3248	-8.01453	-7.53317	-7.64245	-7.37234	-6.38232	-5.3947
									203.7	-8.49909	-8.00097	-7.6828	-7.30078	-7.44997	-6.97606	-7.12456	-5.27185
									203.6	-8.15253	-7.61299	-7.35687	-6.99393	-7.37858	-7.00034	-7.01384	-5.41217
									203.5	-7.87668	-7.22086	-7.0695	-6.78869	-7.34096	-6.9948	-6.5754	-6.00642
									203.4	-7.60928	-6.95204	-6.86105	-6.3665	-7.30918	-6.91224	-6.61885	-6.34548
									203.3	-7.21432	-6.56814	-6.43973	-5.9304	-7.06606	-6.67988	-6.69789	-5.48656
									203.2	-6.92175	-6.22129	-6.22293	-5.64776	-6.7598	-6.81999	-6.74349	-5.27834
									203.1	-6.64615	-5.94944	-5.92381	-5.38198	-6.39155	-7.07425	-6.92433	-5.52116
									203	-6.40186	-5.58232	-5.52684	-5.20065	-6.13927	-7.29621	-6.39056	-4.63737
									202.9	-5.93041	-5.16802	-5.1605	-4.95671	-6.05512	-7.43976	-6.88651	-3.86853
									202.8	-5.68313	-4.8043	-4.79058	-4.5032	-5.97317	-7.17654	-6.62795	-3.63514
									202.7	-5.34494	-4.51105	-4.53752	-4.32954	-5.88136	-7.2932	-6.61521	-3.73752
									202.6	-4.94319	-4.00195	-4.26248	-3.96165	-5.78667	-7.3633	-6.51105	-4.93853
									202.5	-4.59312	-3.63092	-3.89112	-3.52992	-5.35841	-7.24205	-5.91161	-3.20861
									202.4	-4.23214	-3.27534	-3.48166	-3.01424	-5.24993	-7.34728	-5.40277	-3.47447
									202.3	-3.79172	-2.83337	-3.04878	-2.49145	-4.94621	-7.00977	-5.0373	-0.717061
									202.2	-3.42369	-2.39156	-2.7063	-2.19328	-4.77939	-6.10221	-5.36574	-1.09351
									202.1	-3.08143	-1.97316	-2.28281	-1.70819	-4.84449	-5.69691	-5.66525	-1.06241
									202	-2.75345	-1.60558	-1.90008	-1.52322	-4.79238	-5.15231	-6.28439	-0.75087
									201.9	-2.39343	-1.2174	-1.40571	-1.15973	-4.41654	-4.97706	-6.72083	0.0269465
									201.8	-2.01896	-0.859894	-1.09801	-0.836432	-3.93764	-4.84208	-6.83757	0.442113
									201.7	-1.56095	-0.476571	-0.683506	-0.317379	-3.84527	-4.9263	-6.04679	0.366785
									201.6	-1.06101	-0.0638035	-0.260573	0.0517952	-3.85377	-4.61008	-6.26081	1.33007
									201.5	-0.677259	0.487299	0.0439217	0.400829	-3.87055	-4.52552	-6.40121	1.83669
									201.4	-0.0403612	0.999456	0.362377	1.07324	-3.2859	-4.99457	-5.29243	1.32941
									201.3	0.381829	1.49878	0.468145	1.08613	-2.88323	-5.31865	-5.18292	1.44781
									201.2	0.58837	1.78101	0.724272	1.5644	-1.97686	-5.64481	-4.81714	1.26621
									201.1	1.06286	2.16692	1.30439	2.03213	-1.7133	-5.56956	-4.69442	0.632473
									201	1.47714	2.56273	1.73239	2.20834	-1.30684	-5.22421	-5.64571	0.41366
									200.9	1.78022	2.84832	2.17277	2.88291	-1.65609	-5.7652	-5.23107	0.43362
									200.8	2.24183	3.33351	2.60649	3.61118	-1.41857	-5.71711	-4.62085	0.879122
									200.7	2.63835	3.92143	3.08369	4.11256	-1.38165	-5.51825	-5.08993	1.63265
									200.6	3.10547	4.55783	3.56908	4.55387	-1.08109	-4.76661	-5.34765	2.203
									200.5	3.55686	4.92977	3.82198	4.50519	-1.29282	-5.9604	-4.22473	0.173724
									200.4	4.2401	5.55617	4.29757	4.44351	-1.30393	-5.49722	-4.49057	0.347521
									200.3	4.69381	6.04012	4.60141	4.37976	-1.26788	-4.29413	-4.77722	0.462381
									200.2	5.20089	6.39147	5.38095	4.79992	-0.97202	-5.60495	-4.6186	0.983724
									200.1	5.71494	6.86026	5.60869	4.80961	-1.26557	-4.9071	-4.26306	1.71278
									200	6.04683	7.32122	5.994	4.7985	0.269007	-4.21535	-4.30944	2.44275
									199.9	6.38697	7.79485	6.70204	4.62672	-0.612031	-3.58571	-4.56709	1.23193
									199.8	7.05202	8.22168	7.0217	4.56938	-0.934158	-3.08384	-5.48816	0.25704
									199.7	7.6958	8.69678	6.76671	4.14544	-0.599335	-3.67307	-5.93486	0.469141
									199.6	8.30184	9.47269	7.14917	4.73173	-0.584619	-2.74784	-5.72379	-0.457754
									199.5	8.6256	9.92422	7.93564	6.19387	0.848418	-3.1088	-5.33834	-0.514298
									199.4	8.90559	10.6839	8.16413	5.79749	1.62677	-2.53576	-4.15767	-0.803784
									199.3	9.36252	11.1338	8.24306	5.80594	1.22492	-2.50411	-3.88135	-0.509853
									199.2	9.70783	12.2913	8.19923	6.52359	1.86547	-2.78539	-3.96579	-0.914617
									199.1	10.4429	12.5663	8.29831	5.3658	2.43907	-2.01205	-3.63283	-0.669168
									199	10.567	12.7171	7.8238	6.26006	3.46557	-1.57277	-3.26547	-1.75595
									198.9	11.0074	13.0599	7.89539	6.64108	3.24627	-2.41896	-3.2921	-1.05064
									198.8	11.2942	12.8997	8.6714	7.77672	3.85096	-2.96841	-2.96423	-1.16943
									198.7	12.0041	13.7652	9.9236	7.76722	4.52567	-2.18757	-3.54276	-0.0401786
									198.6	12.5816	15.1997	9.58364	7.99874	5.66805	-1.62124	-3.75767	-0.214842
									198.5	13.8756	15.6659	9.57657	8.74465	5.35435	-2.04807	-4.08818	-0.829399
									198.4	14.188	16.0869	10.8162	8.70554	6.5203	-2.02366	-3.63068	-0.645922
									198.3	14.9774	16.5468	10.79	8.3344	7.83884	-0.813333	-4.69474	0.81238
									198.2	15.1971	16.5812	10.8552	7.79875	7.66646	-0.692488	-5.67092	0.511916
									198.1	15.0236	15.6351	10.9842	7.44238	7.23879	-0.285635	-3.91294	0.85826
									198	15.573	16.1429	10.6189	6.77129	8.05387	-0.659717	-4.3235	1.81143
									197.9	16.546	16.9981	10.4208	5.2312	8.52587	-0.0295317	-4.20439	3.26212
									197.8	16.6575	17.1416	10.2291	5.27298	8.33538	0.0383538	-4.66261	3.62209
									197.7	17.2363	17.6164	10.4308	5.5252	6.87399	0.0962418	-3.28005	5.2991
									197.6	17.3418	18.9034	11.4242	5.9531	7.23894	-0.518139	-3.39984	5.17685
									197.5	17.7969	18.2263	10.8817	5.95614	6.58827	0.261671	-3.19378	4.05778
									197.4	18.6158	18.0162	10.4793	6.53967	6.50126	-1.61151	-2.90216	2.86849
									197.3	17.7352	16.3478	10.3961	4.69364	6.52185	-0.574755	-2.39955	3.50235
									197.2	18.2922	15.712	10.5603	4.33659	7.62362	-0.713338	-2.48646	3.93335
									197.1	18.0207	16.2571	10.7087	4.26157	7.6011	-1.01626	-3.03909	3.97275
									197	18.8118	16.6119	10.4967	4.68299	8.48859	-1.92196	-3.38957	3.65548
									196.9	18.5626	16.3644	10.9054	4.14494	8.66035	-0.964759	-3.81903	2.42254
									196.8	19.3146	15.5792	11.4552	3.27849	8.39335	-0.580719	-4.5366	1.93205
									196.7	18.9618	15.5683	9.54657	2.35384	8.89883	0.0191137	-4.0443	1.25375
									196.6	18.3852	15.1255	10.5111	2.45058	9.44033	0.988639	-2.83729	0.0619714
									196.5	19.0528	15.8847	10.3272	1.78648	10.6168	1.19383	-1.92566	0.115925
									196.4	19.1544	15.4394	10.8428	1.89961	11.7998	1.48496	-2.95507	1.10368
									196.3	18.2305	15.522	9.99997	1.66439	11.4954	1.05619	-2.67482	0.692247
									196.2	18.0332	16.418	8.317	2.71445	10.933	0.58718	-2.03201	0.0503616
									196.1	17.5146	15.4441	7.436	1.5628	10.2827	2.16653	-2.5383	0.761092
									196	18.0024	15.6021	7.15411	1.26936	10.2833	2.36084	-2.38123	-0.0955415
									195.9	16.9774	16.7929	5.43066	2.02257	11.183	2.92058	-2.00273	0.557137
									195.8	16.4879	17.4296	4.43416	1.38083	10.4162	2.18217	-1.09325	1.57691
									195.7	15.3453	17.89	4.24274	0.519096	9.81202	2.30486	-1.05432	1.79485
									195.6	15.3022	18.4785	3.32193	1.67798	9.95239	1.75211	-1.64305	2.18599
									195.5	14.9867	18.7763	3.03887	1.10141	9.60199	1.13443	-1.76095	2.72268
									195.4	15.0365	18.0641	2.06234	1.89525	9.55451	0.60772	-1.06905	2.17882
									195.3	13.4137	16.7684	1.82351	1.03304	8.82152	0.14912	-2.0169	0.152423
									195.2	12.6348	16.7769	1.68467	1.70087	9.09643	0.485169	-2.17861	-0.676907
									195.1	12.9038	16.7212	2.02632	2.68251	9.8869	0.534484	-0.865327	-2.05681
									195	14.4431	17.8934	2.11472	2.67482	8.88362	-0.200435	-0.257893	-3.4341
									Channel 2

## Sheet: aBCLW
Notes:
For the GuHCl melt, three scans were performed per sample.
Temperature scans were performed once per construct.
Guanidinium melt						Temperature melt			Wavelength scans at temps
[GuHCl]	mdeg (222 nm)	% folded	Average %	StdDev %		Temperature	mdeg (222 nm)			mdeg (222 nm)								25C (after melt)
0	-16.7377	98.968	100	1.02076		19.89	-17.4849		Wavelength	20°C	30°C	40°C	50°C	60°C	70°C	80°C	90°C	Wavelength	mdeg (222 nm)
0	-17.0829	101.009				22.06	-17.2012		260	0.389071	0.159005	0.21469	0.0928787	0.130106	0.120179	0.288079	0.561284	260	-0.109929
0	-16.9161	100.023				24.06	-17.2713		259.9	0.371651	0.118396	0.22894	0.140346	0.166884	0.108364	0.288377	0.523799	259	0.086371
0.5	-18.3207	108.328	107.736	0.527062		26.11	-17.126		259.8	0.341948	0.122724	0.179005	0.183751	0.154648	0.113946	0.293447	0.54822	258	0.404702
0.5	-18.1498	107.318				28.07	-17.0424		259.7	0.314776	0.145787	0.163862	0.175533	0.190017	0.157145	0.270296	0.540228	257	-0.119535
0.5	-18.1913	107.563				30.08	-17.3671		259.6	0.327692	0.143834	0.161004	0.200042	0.147032	0.148511	0.244795	0.523715	256	0.00153902
1	-17.2929	102.251	103.067	0.830522		32.07	-17.4008		259.5	0.344827	0.135271	0.15362	0.187729	0.175222	0.161342	0.276039	0.513986	255	-0.03087
1	-17.5737	103.911				34.05	-16.9346		259.4	0.321733	0.160833	0.170214	0.154154	0.112317	0.1599	0.293052	0.510472	254	-0.0833509
1	-17.4262	103.039				36.03	-16.2001		259.3	0.309277	0.126751	0.125682	0.159349	0.121368	0.195178	0.273451	0.510873	253	-0.153581
1.25	-15.7088	92.8842	90.0137	2.49317		38.12	-16.4959		259.2	0.267025	0.146589	0.104273	0.190556	0.111216	0.192405	0.281297	0.513803	252	0.00741852
1.25	-15.0127	88.7683				40.1	-16.6271		259.1	0.294264	0.143485	0.0817928	0.187903	0.12273	0.168076	0.261664	0.502323	251	0.257726
1.25	-14.9485	88.3887				42.04	-16.3744		259	0.293982	0.120525	0.0620507	0.187315	0.174343	0.198889	0.309833	0.513924	250	-0.0428841
1.5	-14.4075	85.1898	85.6713	0.825302		44.04	-16.1509		258.9	0.338167	0.128917	0.0590237	0.220634	0.177047	0.228122	0.300817	0.551964	249	-0.193717
1.5	-14.4092	85.1999				46.08	-15.8437		258.8	0.333616	0.159188	0.0164131	0.22835	0.172171	0.208867	0.315691	0.550605	248	-0.299538
1.5	-14.6501	86.6243				48.05	-15.8967		258.7	0.342409	0.149436	0.0377258	0.235416	0.195102	0.191079	0.310861	0.546851	247	-0.169594
2	-8.65614	51.1827	50.3143	1.3199		50.06	-15.4812		258.6	0.386119	0.132381	0.0118249	0.268666	0.238408	0.195068	0.298534	0.552198	246	-0.453615
2	-8.25239	48.7954				52.15	-15.4787		258.5	0.358346	0.147472	0.0354275	0.26577	0.245269	0.127552	0.291072	0.561693	245	-0.214636
2	-8.61927	50.9647				54.08	-15.0035		258.4	0.336031	0.13099	0.0219439	0.293592	0.263258	0.128597	0.262989	0.545377	244	-0.416497
2.25	-5.03929	29.7967	29.8536	0.439522		56.09	-14.2569		258.3	0.350346	0.121014	0.0551232	0.258889	0.288363	0.149723	0.252128	0.534636	243	-0.705325
2.25	-5.12758	30.3188				58.03	-14.1454		258.2	0.326116	0.13022	0.104273	0.286668	0.314886	0.14245	0.235865	0.533726	242	-0.673702
2.25	-4.97985	29.4453				60.1	-13.5898		258.1	0.288084	0.174578	0.114667	0.302511	0.322651	0.126529	0.276761	0.560476	241	-1.02105
2.5	-3.43526	20.3123	20.3101	0.639096		62.08	-13.1036		258	0.267366	0.180442	0.092784	0.257147	0.263823	0.175445	0.278469	0.562306	240	-1.34505
2.5	-3.32663	19.67				64.09	-12.9315		257.9	0.257219	0.17499	0.0894423	0.263597	0.225781	0.177677	0.30616	0.622852	239	-1.81802
2.5	-3.5428	20.9481				66.04	-12.3805		257.8	0.243906	0.193805	0.0722062	0.255736	0.17738	0.172912	0.30057	0.600629	238	-2.53193
3	-1.76985	10.4649	10.0444	0.443046		68.1	-11.4162		257.7	0.157264	0.162299	0.0135422	0.274728	0.162272	0.148433	0.297182	0.626967	237	-3.13193
3	-1.70585	10.0865				70.09	-11.2077		257.6	0.132434	0.162017	0.0656078	0.23681	0.0962948	0.179094	0.301834	0.60751	236	-3.83968
3	-1.6205	9.58182				72.07	-10.5966		257.5	0.121187	0.181397	0.056312	0.229861	0.114903	0.167813	0.322047	0.597573	235	-4.88676
3.5	-0.879286	5.19911	6.9113	1.55759		74.07	-10.1329		257.4	0.110062	0.177062	0.0506485	0.258856	0.116816	0.150905	0.291471	0.637764	234	-5.73999
3.5	-1.23299	7.29052				76.04	-9.05211		257.3	0.120967	0.200273	0.0164454	0.252324	0.114389	0.129346	0.279046	0.610889	233	-6.94181
3.5	-1.39429	8.24427				78.03	-8.59107		257.2	0.128513	0.195109	0.0366753	0.24792	0.096076	0.0755414	0.261814	0.601007	232	-8.18653
4	-0.493043	2.9153	3.13463	1.62875		80.11	-7.99859		257.1	0.11775	0.199471	0.0373534	0.21342	0.0859683	0.0710692	0.250661	0.572887	231	-9.13133
4	-0.822261	4.86193				81.97	-7.38045		257	0.138243	0.182344	0.045	0.198214	0.115653	0.0605165	0.230085	0.547185	230	-10.3279
4	-0.275103	1.62665				84.02	-6.62037		256.9	0.128875	0.189517	0.0517497	0.174808	0.103281	0.0820209	0.24602	0.524138	229	-11.6981
4.5	-0.340218	2.01167	1.65694	0.635739		86.03	-6.13348		256.8	0.12137	0.189992	0.0641045	0.182696	0.113317	0.0481703	0.239744	0.545187	228	-12.847
4.5	-0.344361	2.03617				88	-6.26774		256.7	0.131623	0.135263	0.124971	0.178917	0.0824912	0.00505381	0.249701	0.536653	227	-13.5088
4.5	-0.156098	0.922989				89.91	-5.42057		256.6	0.115807	0.181002	0.102007	0.15955	0.12621	0.00821987	0.243415	0.506476	226	-14.479
5	-0.102746	0.607525	-0.0208403	0.743697		92.07	-5.47689		256.5	0.109245	0.17803	0.125367	0.173834	0.127838	0.00560058	0.284606	0.50086	225	-15.48
5	-0.0290693	0.171883				94.01	-5.22132		256.4	0.0564526	0.159882	0.113141	0.140529	0.154063	0.00607617	0.2577	0.492341	224	-15.808
5	0.142389	-0.841929				96.1	-4.63902		256.3	0.0629549	0.167696	0.065378	0.128809	0.120307	0.015037	0.264845	0.505017	223	-16.3216
5.5	0.288665								256.2	0.0492663	0.206346	0.0195536	0.155874	0.137178	0.0381663	0.23177	0.496906	222	-16.7064
5.5	0.131544								256.1	0.0150267	0.170045	0.0295658	0.161202	0.158169	0.0652854	0.246009	0.484603	221	-16.5648
5.5	0.166522								256	0.0438517	0.234443	0.0612842	0.157815	0.135325	0.0737671	0.24234	0.44574	220	-16.5792
6	0.455809								255.9	0.031105	0.240509	0.0456302	0.167058	0.130948	0.1022	0.264822	0.427698	219	-16.3644
6	0.158101								255.8	0.0318388	0.226315	0.0496717	0.12449	0.126528	0.0703053	0.258013	0.429164	218	-16.2427
6	0.631224								255.7	0.00815081	0.222127	0.0319915	0.0970562	0.115016	0.0439394	0.246606	0.38789	217	-16.0586
									255.6	0.0033158	0.167264	0.0178948	0.155716	0.116405	0.0241713	0.266374	0.444598	216	-15.7613
									255.5	-0.000180429	0.207566	-0.00231152	0.135669	0.0981978	-0.0385144	0.239057	0.426098	215	-15.1919
									255.4	-0.0548063	0.197835	0.0261558	0.14849	0.0791899	-0.0346598	0.234298	0.392964	214	-15.3535
									255.3	-0.124724	0.187869	0.0398303	0.137789	0.0971026	-0.00528048	0.242213	0.386577	213	-15.1952
									255.2	-0.114146	0.231385	0.0382381	0.154858	0.118652	0.0232974	0.276544	0.379331	212	-15.5012
									255.1	-0.08738	0.177548	-0.0464743	0.145401	0.0976054	0.0557551	0.268486	0.398508	211	-15.905
									255	-0.0845878	0.200808	-0.00262404	0.157041	0.0573071	0.0394171	0.229616	0.339677	210	-16.4374
									254.9	-0.0651314	0.177435	-0.0176401	0.16555	0.0515334	0.0271377	0.22427	0.28856	209	-16.8111
									254.8	-0.0789026	0.22568	-0.0490222	0.190031	-0.0192432	-0.00634697	0.225352	0.228128	208	-17.0527
									254.7	-0.0963309	0.22167	-0.00493688	0.181829	-0.0498324	-0.0295398	0.236544	0.209407	207	-16.2786
									254.6	-0.101717	0.181626	-0.0599149	0.203317	-0.0916775	-0.0286174	0.276506	0.189641	206	-14.6721
									254.5	-0.127272	0.170026	-0.051018	0.213259	-0.0390209	-0.0201357	0.242929	0.16053	205	-12.5905
									254.4	-0.10279	0.149495	-0.0621324	0.217482	-0.0129735	-0.0600587	0.233413	0.105125	204	-10.1561
									254.3	-0.0822235	0.136504	-0.0980399	0.265117	-0.0156696	-0.0863141	0.2466	0.0640458	203	-7.25786
									254.2	-0.0884418	0.156179	-0.0914417	0.304722	-0.00523575	-0.0793752	0.21281	0.0711058	202	-3.20541
									254.1	-0.0619444	0.177216	-0.0978998	0.300176	-0.0143575	-0.0841818	0.208891	0.0475258	201	0.33799
									254	-0.0179654	0.159157	-0.120203	0.297981	-0.0242497	-0.0870607	0.175011	0.0336229	200	4.94699
									253.9	-0.0459751	0.141798	-0.123861	0.288518	-0.0216416	-0.106136	0.120004	0.0239459	199	10.471
									253.8	-0.0320425	0.135212	-0.146209	0.288156	-0.0317	-0.0829297	0.158278	0.0187749	198	15.6662
									253.7	-0.0131756	0.142633	-0.153807	0.316829	-0.0476258	-0.0496406	0.16063	0.00374053	197	21.2937
									253.6	-0.00957823	0.164733	-0.18154	0.309378	-0.0605475	-0.0453688	0.138246	-0.014117	196	26.8274
									253.5	0.0172785	0.165827	-0.164803	0.288615	-0.0323791	-0.0782334	0.129376	-0.00707351	195	22.5239
									253.4	0.0287661	0.134029	-0.148345	0.3174	-0.0256985	-0.0603067	0.13762	0.00825711
									253.3	0.0486677	0.179246	-0.107726	0.290609	-0.0217033	-0.0293678	0.136222	-0.016653
									253.2	0.0648899	0.160719	-0.092504	0.302282	0.0154336	-0.0173731	0.127866	-0.01982
									253.1	0.0248942	0.113212	-0.102076	0.286308	0.0535134	-0.00886311	0.160313	-0.00131198
									253	-0.0156919	0.0608749	-0.0752713	0.304266	0.0444821	-0.0533154	0.202837	0.00408369
									252.9	-0.00235554	0.0499843	-0.107737	0.31908	0.0495944	-0.0515721	0.159482	-0.0194614
									252.8	0.0325985	0.0362078	-0.12304	0.330618	0.0434278	-0.0575795	0.176027	-0.0311243
									252.7	-0.00290833	0.0382348	-0.0987637	0.339848	0.0538143	-0.0659853	0.145676	-0.00129573
									252.6	-0.0509315	0.0294661	-0.0903316	0.347201	0.0450606	-0.0705848	0.144364	-0.017909
									252.5	-0.0669469	0.0499257	-0.0993087	0.339915	0.00991028	-0.0359059	0.121775	-0.0447491
									252.4	-0.0577735	0.0631534	-0.124799	0.348182	0.0173093	-0.0131934	0.116715	-0.0306305
									252.3	-0.0677347	0.0409872	-0.0702667	0.371669	0.00307415	-0.0203614	0.131071	-0.0403216
									252.2	-0.0727956	0.0170419	-0.0713144	0.409718	-0.00583595	-0.0327838	0.117711	-0.0291805
									252.1	-0.0617379	-0.000420515	-0.100229	0.406222	0.00394351	-0.0670505	0.0685069	-0.0343807
									252	-0.0415418	0.030707	-0.129736	0.376949	0.0241995	-0.0935815	0.0833537	-0.050617
									251.9	-0.0526244	0.0705138	-0.126636	0.411954	0.0224233	-0.104755	0.0619737	-0.0677738
									251.8	-0.0710255	0.0553322	-0.151535	0.393197	0.0522135	-0.0708639	0.0596821	-0.0305114
									251.7	-0.116731	0.0685661	-0.212527	0.382993	0.0397378	-0.0431289	0.0681333	-0.0338946
									251.6	-0.12518	0.0608745	-0.143607	0.367901	0.0129057	-0.0878791	0.055874	-0.04644
									251.5	-0.105424	0.0500128	-0.129513	0.352312	0.00115074	-0.0902738	0.0659005	-0.0708752
									251.4	-0.108643	0.0617057	-0.111319	0.374537	-0.00830131	-0.0968701	0.0584838	-0.0599232
									251.3	-0.156922	0.0620522	-0.112546	0.387081	-0.0167046	-0.122568	0.0354354	-0.0820545
									251.2	-0.151653	0.0792536	-0.133841	0.414807	-0.0115551	-0.0935862	0.015081	-0.0964427
									251.1	-0.143022	0.0928011	-0.122955	0.412089	0.0189046	-0.115694	0.0228562	-0.113435
									251	-0.119015	0.100186	-0.132766	0.421355	0.0361096	-0.108658	-0.0413588	-0.154348
									250.9	-0.130992	0.0770721	-0.120477	0.39566	0.0219668	-0.109412	-0.025041	-0.153346
									250.8	-0.11768	0.108178	-0.074256	0.377271	-0.0211907	-0.115104	-0.0702328	-0.18243
									250.7	-0.116617	0.108259	-0.0585785	0.36734	0.0151906	-0.126922	-0.082318	-0.220912
									250.6	-0.143726	0.126018	-0.0672496	0.360586	0.00504101	-0.133091	-0.0816901	-0.203136
									250.5	-0.178674	0.112595	-0.0990484	0.380456	0.00579752	-0.14478	-0.0769535	-0.244634
									250.4	-0.218985	0.101304	-0.0654274	0.359021	-0.026572	-0.143046	-0.0659939	-0.269671
									250.3	-0.185122	0.0910154	-0.0758945	0.332064	-0.0433405	-0.0903698	-0.0670922	-0.258529
									250.2	-0.179805	0.111624	-0.0809643	0.306931	-0.0504002	-0.0870503	-0.0153821	-0.251079
									250.1	-0.199065	0.100639	-0.0876569	0.3117	-0.0542334	-0.110012	-0.0060242	-0.24596
									250	-0.173541	0.117413	-0.104857	0.333793	-0.126872	-0.115964	0.0210659	-0.266162
									249.9	-0.166127	0.105036	-0.117064	0.366468	-0.106149	-0.10983	-0.0653465	-0.309374
									249.8	-0.186031	0.0860179	-0.0836768	0.363538	-0.0758347	-0.153675	-0.0862374	-0.30333
									249.7	-0.138724	0.101678	-0.0918458	0.353339	-0.0635512	-0.158138	-0.105218	-0.320401
									249.6	-0.117703	0.0821527	-0.0572952	0.350217	-0.0534844	-0.161255	-0.0774845	-0.35344
									249.5	-0.0422128	0.0979052	-0.0282779	0.313939	-0.0598467	-0.151043	-0.0601679	-0.355124
									249.4	-0.0270028	0.0765438	-0.0814852	0.332878	-0.00329988	-0.163748	-0.0831458	-0.329011
									249.3	-0.0164343	0.0950292	-0.0800486	0.317251	0.0150457	-0.170547	-0.133415	-0.312127
									249.2	-0.0315787	0.131523	-0.0951989	0.27869	0.0318129	-0.204642	-0.107731	-0.349719
									249.1	-0.0158921	0.124132	-0.100742	0.273938	0.0427102	-0.208603	-0.123033	-0.345709
									249	-0.011778	0.151389	-0.113084	0.265277	0.032144	-0.17692	-0.139478	-0.364645
									248.9	0.0206284	0.164242	-0.11181	0.291977	0.0484138	-0.240012	-0.138369	-0.363331
									248.8	-0.0119164	0.179599	-0.146895	0.301134	0.0445096	-0.228379	-0.187814	-0.3266
									248.7	-0.0349582	0.188124	-0.172462	0.288237	0.0372623	-0.23771	-0.162993	-0.303
									248.6	-0.0232704	0.189484	-0.232476	0.271157	0.0374064	-0.212271	-0.176614	-0.359443
									248.5	-0.0372155	0.154372	-0.258729	0.273814	0.065216	-0.199974	-0.141532	-0.357824
									248.4	-0.0615484	0.136548	-0.27417	0.319039	0.0053023	-0.170597	-0.151999	-0.329895
									248.3	-0.0800418	0.135013	-0.302151	0.310375	0.00113362	-0.146728	-0.165948	-0.313513
									248.2	-0.0650903	0.132115	-0.289285	0.300609	-0.0167273	-0.179865	-0.174101	-0.339208
									248.1	-0.0521309	0.168468	-0.305769	0.342902	-0.0772408	-0.173079	-0.150731	-0.330708
									248	-0.103978	0.135657	-0.316367	0.353837	-0.0560917	-0.185004	-0.15777	-0.368238
									247.9	-0.134048	0.12216	-0.313099	0.314299	-0.0698054	-0.21044	-0.175855	-0.371235
									247.8	-0.165544	0.0907271	-0.365773	0.295816	-0.0565384	-0.221995	-0.239008	-0.397621
									247.7	-0.144508	0.0889252	-0.377861	0.270758	-0.02747	-0.271209	-0.249603	-0.340043
									247.6	-0.154191	0.075804	-0.3942	0.284336	-0.0803273	-0.246282	-0.263862	-0.324372
									247.5	-0.169616	0.106494	-0.449282	0.323243	-0.107887	-0.210936	-0.274141	-0.30009
									247.4	-0.2087	0.149965	-0.477648	0.291898	-0.160349	-0.226988	-0.260936	-0.298139
									247.3	-0.213767	0.12654	-0.490918	0.281929	-0.148307	-0.195546	-0.28774	-0.333835
									247.2	-0.182345	0.162722	-0.524001	0.272228	-0.121209	-0.182105	-0.331248	-0.361128
									247.1	-0.164135	0.127103	-0.509791	0.247531	-0.162701	-0.24409	-0.347659	-0.3955
									247	-0.148975	0.0976909	-0.509635	0.275542	-0.182717	-0.300118	-0.424704	-0.432705
									246.9	-0.174698	0.110928	-0.51607	0.261493	-0.19108	-0.288542	-0.431467	-0.445231
									246.8	-0.21542	0.136387	-0.531889	0.211078	-0.14415	-0.287704	-0.441115	-0.44312
									246.7	-0.27215	0.123664	-0.559388	0.171357	-0.110312	-0.266541	-0.43498	-0.423102
									246.6	-0.305423	0.0950381	-0.584369	0.16038	-0.118608	-0.265894	-0.440808	-0.406204
									246.5	-0.287735	0.08446	-0.633175	0.158369	-0.107806	-0.209527	-0.45932	-0.394221
									246.4	-0.316508	0.0631268	-0.617255	0.102078	-0.0959748	-0.165694	-0.472944	-0.421145
									246.3	-0.330479	0.106644	-0.598689	0.0802214	-0.126439	-0.199712	-0.485987	-0.411129
									246.2	-0.358731	0.126934	-0.583829	0.0449724	-0.147981	-0.188597	-0.480341	-0.37291
									246.1	-0.35983	0.134924	-0.614442	0.0476477	-0.150223	-0.191421	-0.5412	-0.355944
									246	-0.373576	0.123795	-0.611423	0.0352524	-0.189843	-0.257086	-0.504229	-0.353068
									245.9	-0.384605	0.0874734	-0.667906	0.0571877	-0.216765	-0.262278	-0.568378	-0.31505
									245.8	-0.412912	0.0846434	-0.658021	0.0532921	-0.195168	-0.271713	-0.560564	-0.322897
									245.7	-0.412825	0.0822634	-0.66056	0.0919312	-0.207917	-0.229614	-0.568151	-0.34112
									245.6	-0.383754	0.093296	-0.647023	0.0751555	-0.209113	-0.228908	-0.553983	-0.331699
									245.5	-0.443201	0.0971282	-0.663707	0.0526369	-0.169179	-0.27307	-0.580365	-0.333271
									245.4	-0.470163	0.0307815	-0.651353	0.0339022	-0.184508	-0.267603	-0.580408	-0.376732
									245.3	-0.518167	-0.0282447	-0.632634	0.0727711	-0.212852	-0.22033	-0.606999	-0.320828
									245.2	-0.557245	-0.00188737	-0.649706	0.0313247	-0.210555	-0.284465	-0.630335	-0.311033
									245.1	-0.607635	-0.0768189	-0.656791	0.0795511	-0.231457	-0.310527	-0.676562	-0.315026
									245	-0.683479	-0.0864062	-0.648075	0.0521859	-0.29033	-0.361126	-0.689819	-0.301285
									244.9	-0.639696	-0.0997777	-0.654649	0.0571918	-0.379873	-0.376631	-0.710533	-0.300142
									244.8	-0.614927	-0.0389713	-0.6983	0.0394593	-0.432479	-0.358632	-0.737844	-0.313056
									244.7	-0.649187	-0.0696266	-0.701931	0.0167704	-0.470821	-0.383928	-0.746424	-0.371908
									244.6	-0.683883	-0.0801846	-0.681744	-0.0180733	-0.453623	-0.415414	-0.763679	-0.397624
									244.5	-0.696339	-0.118741	-0.714391	-0.0413472	-0.464056	-0.465684	-0.798942	-0.410061
									244.4	-0.68534	-0.0891413	-0.693906	-0.0372324	-0.50717	-0.467052	-0.806969	-0.405638
									244.3	-0.663856	-0.0862624	-0.720945	-0.0911798	-0.521716	-0.492731	-0.738453	-0.41527
									244.2	-0.642632	-0.11691	-0.723118	-0.143285	-0.523581	-0.520406	-0.780788	-0.445271
									244.1	-0.658918	-0.135067	-0.720619	-0.176915	-0.558374	-0.526383	-0.763892	-0.477952
									244	-0.689689	-0.18145	-0.779294	-0.218439	-0.566767	-0.539962	-0.77896	-0.455996
									243.9	-0.734076	-0.174147	-0.800717	-0.252795	-0.589415	-0.61071	-0.762569	-0.463088
									243.8	-0.738727	-0.221558	-0.830784	-0.272342	-0.58149	-0.612124	-0.787694	-0.465295
									243.7	-0.760377	-0.259621	-0.83062	-0.265823	-0.650694	-0.6128	-0.850249	-0.501172
									243.6	-0.788287	-0.283343	-0.871797	-0.316407	-0.674429	-0.617943	-0.846406	-0.474613
									243.5	-0.801747	-0.30408	-0.849448	-0.336146	-0.735166	-0.672674	-0.864019	-0.51778
									243.4	-0.782778	-0.345994	-0.866377	-0.37506	-0.798039	-0.716721	-0.893188	-0.532504
									243.3	-0.760255	-0.341439	-0.887377	-0.373925	-0.842185	-0.782925	-0.85642	-0.501443
									243.2	-0.808077	-0.397724	-0.941883	-0.395422	-0.863393	-0.855483	-0.841316	-0.498014
									243.1	-0.812849	-0.387556	-0.995168	-0.447019	-0.897771	-0.856429	-0.790308	-0.509076
									243	-0.776351	-0.398709	-0.996518	-0.474838	-0.903961	-0.869616	-0.865975	-0.516565
									242.9	-0.790966	-0.432033	-1.01368	-0.534853	-0.920498	-0.891512	-0.902397	-0.538962
									242.8	-0.813657	-0.470262	-1.0303	-0.569315	-0.97585	-0.929034	-0.930686	-0.551159
									242.7	-0.868393	-0.497412	-1.07956	-0.622024	-1.01745	-0.916743	-0.904029	-0.536244
									242.6	-0.898089	-0.486582	-1.10771	-0.658679	-1.06176	-0.947653	-0.93472	-0.56915
									242.5	-0.955911	-0.504348	-1.12444	-0.674014	-1.05579	-0.984097	-0.930647	-0.526338
									242.4	-1.02548	-0.503595	-1.16822	-0.709502	-1.12936	-0.97014	-0.982322	-0.47685
									242.3	-1.06389	-0.557689	-1.20179	-0.762865	-1.16221	-0.99272	-1.02939	-0.530642
									242.2	-1.0791	-0.592236	-1.23522	-0.826789	-1.22786	-0.981042	-1.08624	-0.496501
									242.1	-1.09152	-0.601095	-1.22934	-0.841464	-1.25447	-1.01292	-1.14937	-0.493301
									242	-1.12325	-0.59471	-1.25148	-0.827651	-1.27973	-1.06602	-1.20566	-0.518202
									241.9	-1.14167	-0.629354	-1.28578	-0.869735	-1.34326	-1.10605	-1.23018	-0.530556
									241.8	-1.20446	-0.624934	-1.29916	-0.887364	-1.38915	-1.11314	-1.26659	-0.591815
									241.7	-1.25791	-0.680364	-1.32981	-0.919158	-1.38892	-1.11435	-1.292	-0.576901
									241.6	-1.2899	-0.732311	-1.33288	-0.963075	-1.43247	-1.12187	-1.26233	-0.584171
									241.5	-1.27045	-0.78488	-1.35049	-1.04736	-1.51039	-1.14829	-1.27873	-0.571312
									241.4	-1.31393	-0.779799	-1.3575	-1.02881	-1.52675	-1.18081	-1.29803	-0.569392
									241.3	-1.37083	-0.824823	-1.35908	-1.0716	-1.55276	-1.22121	-1.36237	-0.587516
									241.2	-1.43911	-0.870838	-1.40329	-1.06678	-1.55488	-1.23564	-1.42576	-0.618424
									241.1	-1.46156	-0.904019	-1.44896	-1.06718	-1.62573	-1.25282	-1.47354	-0.662134
									241	-1.4618	-1.00271	-1.45823	-1.06899	-1.70958	-1.28201	-1.47493	-0.650113
									240.9	-1.4908	-1.07298	-1.46517	-1.05329	-1.78866	-1.26694	-1.53936	-0.700756
									240.8	-1.55945	-1.10682	-1.49055	-1.07265	-1.87476	-1.27701	-1.53379	-0.707235
									240.7	-1.64521	-1.18124	-1.57418	-1.11876	-1.93146	-1.35908	-1.52185	-0.732361
									240.6	-1.70056	-1.22085	-1.595	-1.1642	-1.9512	-1.38566	-1.52453	-0.748638
									240.5	-1.78964	-1.31013	-1.6343	-1.22517	-1.97626	-1.42215	-1.53621	-0.804587
									240.4	-1.82264	-1.37034	-1.67265	-1.2902	-2.02983	-1.44177	-1.56442	-0.802247
									240.3	-1.88042	-1.39455	-1.68457	-1.32372	-2.04548	-1.46892	-1.55628	-0.764266
									240.2	-1.88713	-1.42779	-1.71547	-1.40449	-2.10955	-1.52566	-1.59971	-0.760929
									240.1	-1.9005	-1.47125	-1.74764	-1.43165	-2.1448	-1.56217	-1.60616	-0.811543
									240	-1.97162	-1.51317	-1.77075	-1.5067	-2.13223	-1.60741	-1.64789	-0.861352
									239.9	-2.05458	-1.55934	-1.78977	-1.55834	-2.17933	-1.6562	-1.67973	-0.875644
									239.8	-2.10066	-1.63915	-1.85051	-1.63465	-2.20333	-1.67727	-1.71662	-0.891623
									239.7	-2.12655	-1.68312	-1.84877	-1.6986	-2.22273	-1.72701	-1.73964	-0.881698
									239.6	-2.15569	-1.72317	-1.91667	-1.70476	-2.24169	-1.72251	-1.75205	-0.87064
									239.5	-2.18396	-1.76742	-1.9697	-1.73727	-2.30173	-1.74602	-1.74661	-0.875707
									239.4	-2.28345	-1.82319	-1.98902	-1.76446	-2.37682	-1.79955	-1.72359	-0.916805
									239.3	-2.30559	-1.83542	-1.98984	-1.8376	-2.36999	-1.82053	-1.71036	-0.98073
									239.2	-2.35396	-1.90315	-2.04423	-1.84503	-2.44544	-1.91569	-1.68326	-1.04395
									239.1	-2.38985	-1.99226	-2.09138	-1.9175	-2.46383	-1.99326	-1.71746	-1.13021
									239	-2.41271	-2.06919	-2.15816	-1.95322	-2.48702	-2.03906	-1.78923	-1.16389
									238.9	-2.46507	-2.11051	-2.20657	-2.03892	-2.51918	-2.08989	-1.78596	-1.1886
									238.8	-2.5359	-2.15113	-2.2445	-2.06092	-2.53012	-2.08885	-1.78729	-1.14162
									238.7	-2.5983	-2.17452	-2.35174	-2.16152	-2.53204	-2.13614	-1.82302	-1.16976
									238.6	-2.63652	-2.22529	-2.44582	-2.25766	-2.57293	-2.19411	-1.82988	-1.15599
									238.5	-2.70024	-2.3172	-2.4575	-2.33185	-2.66316	-2.23027	-1.87242	-1.22229
									238.4	-2.71649	-2.40289	-2.51344	-2.38786	-2.69153	-2.2843	-1.85976	-1.22359
									238.3	-2.77273	-2.45417	-2.53085	-2.43692	-2.77472	-2.34935	-1.88779	-1.25463
									238.2	-2.79023	-2.54136	-2.59314	-2.50219	-2.84843	-2.39628	-1.95086	-1.3484
									238.1	-2.87738	-2.585	-2.63055	-2.59815	-2.887	-2.4748	-1.9789	-1.39953
									238	-2.94345	-2.6387	-2.73791	-2.65286	-2.89613	-2.51439	-2.01038	-1.39562
									237.9	-3.00209	-2.71783	-2.79592	-2.69491	-2.95701	-2.53684	-2.04872	-1.43495
									237.8	-3.03182	-2.78914	-2.9052	-2.71277	-3.04454	-2.56726	-2.09491	-1.45129
									237.7	-3.11394	-2.86852	-2.94689	-2.79242	-3.11094	-2.58608	-2.07871	-1.46317
									237.6	-3.21044	-2.96492	-3.01668	-2.84169	-3.17307	-2.65112	-2.12958	-1.47792
									237.5	-3.26936	-2.95822	-3.06613	-2.97236	-3.2297	-2.68828	-2.1724	-1.53348
									237.4	-3.32896	-3.0199	-3.1287	-3.02547	-3.3062	-2.67003	-2.17501	-1.58235
									237.3	-3.36483	-3.10772	-3.22837	-3.07205	-3.3876	-2.75353	-2.17166	-1.57177
									237.2	-3.4529	-3.16891	-3.31244	-3.12658	-3.42936	-2.81926	-2.23903	-1.56692
									237.1	-3.50087	-3.21364	-3.40179	-3.16941	-3.49251	-2.90562	-2.25823	-1.60411
									237	-3.5346	-3.30165	-3.52574	-3.22171	-3.57283	-2.95308	-2.29461	-1.58551
									236.9	-3.60956	-3.39193	-3.60633	-3.32413	-3.68315	-3.04986	-2.34711	-1.59119
									236.8	-3.68795	-3.46851	-3.72612	-3.38435	-3.77591	-3.0543	-2.38493	-1.62005
									236.7	-3.7638	-3.52406	-3.77064	-3.49395	-3.82643	-3.10754	-2.38581	-1.64169
									236.6	-3.79748	-3.59721	-3.8677	-3.54929	-3.86223	-3.15683	-2.44339	-1.66699
									236.5	-3.84638	-3.64213	-3.9616	-3.6247	-3.85791	-3.1894	-2.44794	-1.66014
									236.4	-3.93638	-3.69678	-4.00475	-3.68614	-3.89277	-3.25042	-2.51463	-1.68945
									236.3	-3.98945	-3.80531	-4.10811	-3.77674	-3.8935	-3.3426	-2.50813	-1.68261
									236.2	-4.04731	-3.82082	-4.17627	-3.86489	-3.97211	-3.35967	-2.5609	-1.70135
									236.1	-4.06956	-3.90495	-4.2777	-3.9864	-4.02989	-3.41189	-2.6034	-1.67738
									236	-4.16165	-4.00195	-4.34074	-4.10717	-4.09059	-3.47271	-2.63345	-1.7085
									235.9	-4.26463	-4.16763	-4.41513	-4.17076	-4.11618	-3.56243	-2.6194	-1.73469
									235.8	-4.40478	-4.27538	-4.4788	-4.20765	-4.18294	-3.6259	-2.66517	-1.78044
									235.7	-4.50161	-4.4226	-4.63371	-4.29001	-4.27846	-3.6604	-2.71283	-1.79587
									235.6	-4.58202	-4.46794	-4.70668	-4.31948	-4.34833	-3.732	-2.78992	-1.81073
									235.5	-4.65704	-4.61386	-4.7831	-4.44107	-4.4023	-3.78937	-2.86582	-1.85596
									235.4	-4.72705	-4.69436	-4.81703	-4.48379	-4.4662	-3.8336	-2.89136	-1.89631
									235.3	-4.85958	-4.76187	-4.89976	-4.57671	-4.51162	-3.88008	-2.8794	-1.89314
									235.2	-4.93581	-4.77641	-5.00549	-4.67522	-4.50386	-3.89742	-2.90244	-1.90805
									235.1	-5.04713	-4.9168	-5.06745	-4.76241	-4.51857	-3.97032	-2.95441	-1.98017
									235	-5.18711	-5.00186	-5.18983	-4.86972	-4.60502	-4.04122	-2.95549	-2.03304
									234.9	-5.26127	-5.08558	-5.29078	-4.9216	-4.66993	-4.07843	-2.97458	-2.05007
									234.8	-5.35528	-5.13756	-5.33604	-5.0345	-4.6885	-4.08098	-3.02999	-2.07518
									234.7	-5.48061	-5.26502	-5.44762	-5.15389	-4.78327	-4.12143	-3.12629	-2.15185
									234.6	-5.59909	-5.42753	-5.49865	-5.22578	-4.85246	-4.2146	-3.20293	-2.17722
									234.5	-5.69742	-5.54073	-5.58263	-5.30105	-4.96693	-4.2617	-3.27587	-2.2191
									234.4	-5.79888	-5.68887	-5.67451	-5.39435	-5.03005	-4.35235	-3.23691	-2.25347
									234.3	-5.90734	-5.83198	-5.73608	-5.46791	-5.13653	-4.41033	-3.2505	-2.26222
									234.2	-6.01382	-5.93022	-5.82307	-5.55409	-5.16158	-4.45566	-3.30925	-2.26688
									234.1	-6.0875	-6.02467	-5.82004	-5.63998	-5.25953	-4.53362	-3.34975	-2.28836
									234	-6.2106	-6.15978	-5.93285	-5.75329	-5.28674	-4.60842	-3.39901	-2.30716
									233.9	-6.33978	-6.30014	-6.07797	-5.83269	-5.41233	-4.70716	-3.42733	-2.41006
									233.8	-6.4712	-6.46338	-6.17467	-5.90267	-5.49685	-4.77742	-3.50498	-2.41809
									233.7	-6.58044	-6.51899	-6.20688	-5.95923	-5.55092	-4.86587	-3.562	-2.5051
									233.6	-6.7154	-6.64626	-6.2872	-6.00998	-5.64508	-4.92886	-3.54782	-2.54422
									233.5	-6.81952	-6.72559	-6.4295	-6.11359	-5.73166	-4.95358	-3.57076	-2.58907
									233.4	-6.86903	-6.8835	-6.52644	-6.19336	-5.79119	-5.01679	-3.60743	-2.5955
									233.3	-7.00663	-7.03443	-6.60562	-6.29283	-5.82412	-5.07269	-3.67832	-2.6015
									233.2	-7.11852	-7.19415	-6.78844	-6.3925	-5.96936	-5.1453	-3.77883	-2.6059
									233.1	-7.16899	-7.31681	-6.87325	-6.48206	-6.05312	-5.22835	-3.81937	-2.62086
									233	-7.35206	-7.41416	-7.02127	-6.52161	-6.14006	-5.28454	-3.8585	-2.66823
									232.9	-7.4843	-7.54032	-7.18011	-6.61849	-6.17738	-5.33442	-3.86687	-2.74785
									232.8	-7.60427	-7.67032	-7.3008	-6.74167	-6.27308	-5.31091	-3.8847	-2.74254
									232.7	-7.74958	-7.81536	-7.42515	-6.85322	-6.32547	-5.36652	-3.9266	-2.7902
									232.6	-7.87496	-7.97524	-7.52181	-6.98698	-6.44055	-5.44481	-3.91918	-2.8573
									232.5	-8.01928	-8.05946	-7.71126	-7.097	-6.52908	-5.53574	-3.975	-2.92096
									232.4	-8.16938	-8.13008	-7.85414	-7.24114	-6.58179	-5.58356	-3.98903	-2.987
									232.3	-8.27211	-8.24584	-7.98363	-7.36126	-6.64888	-5.66491	-4.05817	-3.02546
									232.2	-8.362	-8.38742	-8.08171	-7.43204	-6.71596	-5.71154	-4.16487	-3.02048
									232.1	-8.4986	-8.49981	-8.23862	-7.56107	-6.81414	-5.73329	-4.24786	-3.06516
									232	-8.62806	-8.59741	-8.37751	-7.63007	-6.90569	-5.76069	-4.3264	-3.07594
									231.9	-8.72662	-8.68525	-8.48385	-7.7222	-7.0375	-5.82432	-4.40044	-3.15389
									231.8	-8.83653	-8.8054	-8.6022	-7.78711	-7.09986	-5.93816	-4.46803	-3.19424
									231.7	-8.90418	-8.88993	-8.6715	-7.86626	-7.23859	-5.98934	-4.518	-3.26286
									231.6	-9.08323	-8.9841	-8.759	-7.96174	-7.33436	-6.06082	-4.57901	-3.27549
									231.5	-9.22687	-9.07909	-8.86342	-8.11249	-7.44453	-6.14177	-4.6659	-3.29057
									231.4	-9.34596	-9.21901	-9.0328	-8.19608	-7.50432	-6.21301	-4.68811	-3.30576
									231.3	-9.44216	-9.33101	-9.10618	-8.31619	-7.5863	-6.27477	-4.75126	-3.357
									231.2	-9.5541	-9.43314	-9.256	-8.46864	-7.68773	-6.31233	-4.80315	-3.46092
									231.1	-9.66732	-9.55342	-9.41021	-8.56148	-7.83089	-6.40402	-4.81865	-3.50398
									231	-9.78298	-9.67855	-9.55196	-8.66908	-7.90949	-6.52409	-4.88841	-3.59029
									230.9	-9.87144	-9.78188	-9.633	-8.73578	-7.95558	-6.59115	-4.93847	-3.59877
									230.8	-9.9846	-9.86868	-9.77391	-8.81423	-8.06173	-6.61449	-5.05679	-3.61994
									230.7	-10.1333	-10.0775	-9.89794	-9.03317	-8.14193	-6.6417	-5.18333	-3.67491
									230.6	-10.3017	-10.1879	-9.97938	-9.16975	-8.26187	-6.70222	-5.25822	-3.67243
									230.5	-10.4349	-10.3303	-10.1003	-9.30121	-8.37013	-6.76751	-5.30204	-3.73904
									230.4	-10.5329	-10.5221	-10.2386	-9.36681	-8.45528	-6.85782	-5.36436	-3.76377
									230.3	-10.6046	-10.634	-10.3793	-9.50267	-8.5469	-6.95505	-5.39149	-3.83441
									230.2	-10.7288	-10.7696	-10.4409	-9.59637	-8.6785	-7.01822	-5.37698	-3.8554
									230.1	-10.8787	-10.859	-10.5149	-9.67306	-8.75579	-7.07263	-5.43335	-3.89324
									230	-10.959	-10.9318	-10.6153	-9.76171	-8.80443	-7.13685	-5.44498	-3.86886
									229.9	-11.1223	-11.1139	-10.7531	-9.88133	-8.91812	-7.20977	-5.52391	-3.86452
									229.8	-11.2435	-11.2009	-10.8269	-9.94164	-8.99549	-7.25456	-5.53769	-3.86263
									229.7	-11.3881	-11.2876	-10.9606	-9.99221	-9.08819	-7.33675	-5.58751	-3.87325
									229.6	-11.447	-11.4042	-11.1209	-10.0632	-9.22569	-7.43702	-5.59988	-3.93826
									229.5	-11.5739	-11.4906	-11.2142	-10.128	-9.31854	-7.53914	-5.61083	-3.95567
									229.4	-11.693	-11.6556	-11.3372	-10.2544	-9.36457	-7.65095	-5.64743	-3.97919
									229.3	-11.8338	-11.7196	-11.482	-10.362	-9.41685	-7.73473	-5.72133	-4.03758
									229.2	-11.9118	-11.8246	-11.6215	-10.5041	-9.48138	-7.79431	-5.74481	-4.08735
									229.1	-11.9926	-11.9753	-11.7333	-10.6046	-9.59792	-7.83043	-5.76278	-4.11023
									229	-12.1363	-12.1104	-11.8182	-10.681	-9.66184	-7.95275	-5.76709	-4.10486
									228.9	-12.3351	-12.2479	-11.9255	-10.8258	-9.74709	-8.02614	-5.81877	-4.16387
									228.8	-12.4736	-12.3783	-11.984	-10.9287	-9.90967	-8.05587	-5.84386	-4.23214
									228.7	-12.5984	-12.485	-12.0842	-11.0447	-9.98021	-8.08428	-5.87803	-4.29447
									228.6	-12.6823	-12.5412	-12.1791	-11.1445	-10.0351	-8.17224	-5.93222	-4.33311
									228.5	-12.7711	-12.6725	-12.294	-11.2572	-10.0858	-8.21554	-5.98191	-4.42755
									228.4	-12.8721	-12.842	-12.3844	-11.3622	-10.1882	-8.31592	-5.97065	-4.42901
									228.3	-12.9617	-12.9432	-12.4748	-11.4631	-10.3216	-8.35712	-6.06214	-4.4829
									228.2	-13.0115	-13.0793	-12.5515	-11.5513	-10.3695	-8.36787	-6.07542	-4.56518
									228.1	-13.1861	-13.2009	-12.6196	-11.658	-10.4722	-8.41867	-6.13022	-4.55079
									228	-13.3644	-13.38	-12.7578	-11.7392	-10.6142	-8.43998	-6.19118	-4.65762
									227.9	-13.4911	-13.4803	-12.8124	-11.7753	-10.6572	-8.4994	-6.19957	-4.66021
									227.8	-13.6046	-13.6065	-12.8645	-11.839	-10.7483	-8.56685	-6.27022	-4.71891
									227.7	-13.682	-13.6883	-12.9375	-11.8974	-10.8711	-8.59716	-6.29125	-4.75945
									227.6	-13.7621	-13.7688	-13.0594	-11.9294	-10.9055	-8.60437	-6.3303	-4.77879
									227.5	-13.8708	-13.8223	-13.1552	-12.0064	-10.9384	-8.68192	-6.38901	-4.84604
									227.4	-13.9848	-13.8867	-13.2049	-12.1167	-11.0488	-8.77319	-6.3858	-4.89975
									227.3	-14.0927	-13.9597	-13.2779	-12.2034	-11.1139	-8.77923	-6.41952	-4.92486
									227.2	-14.1877	-13.9618	-13.3674	-12.2757	-11.1657	-8.75834	-6.44511	-5.00939
									227.1	-14.2849	-14.0799	-13.4296	-12.3462	-11.247	-8.77151	-6.51794	-5.01291
									227	-14.3756	-14.2032	-13.5103	-12.4202	-11.3313	-8.85075	-6.58316	-5.05933
									226.9	-14.4545	-14.2905	-13.594	-12.4744	-11.4282	-8.92865	-6.59954	-5.03098
									226.8	-14.5244	-14.3466	-13.6713	-12.4987	-11.4802	-8.95646	-6.61543	-5.07734
									226.7	-14.5873	-14.4731	-13.7189	-12.5973	-11.5055	-9.01788	-6.6358	-5.14272
									226.6	-14.7194	-14.6064	-13.8036	-12.6787	-11.5398	-9.07103	-6.66431	-5.16156
									226.5	-14.8187	-14.6472	-13.8816	-12.7531	-11.6302	-9.13929	-6.60554	-5.21406
									226.4	-14.8718	-14.7262	-13.9446	-12.7928	-11.6714	-9.20142	-6.60592	-5.22506
									226.3	-14.9733	-14.7905	-14.0471	-12.8612	-11.6907	-9.21745	-6.61916	-5.28443
									226.2	-15.0917	-14.8618	-14.1157	-12.9014	-11.7303	-9.26892	-6.71363	-5.31362
									226.1	-15.171	-14.9324	-14.2324	-13.0203	-11.8024	-9.3213	-6.80691	-5.34544
									226	-15.2593	-15.0194	-14.3136	-13.1245	-11.8374	-9.38007	-6.81581	-5.38879
									225.9	-15.3141	-15.0857	-14.436	-13.1781	-11.8994	-9.47406	-6.85827	-5.43004
									225.8	-15.3874	-15.1638	-14.5276	-13.204	-11.959	-9.51185	-6.91981	-5.43186
									225.7	-15.4962	-15.2973	-14.5875	-13.2648	-12.0713	-9.53993	-6.93162	-5.51539
									225.6	-15.5092	-15.3512	-14.6407	-13.3507	-12.1088	-9.60082	-6.93346	-5.57463
									225.5	-15.5725	-15.4106	-14.784	-13.4561	-12.1315	-9.63823	-6.99411	-5.54675
									225.4	-15.6241	-15.4724	-14.9293	-13.6033	-12.1701	-9.71004	-7.02255	-5.53389
									225.3	-15.6736	-15.5538	-14.9908	-13.656	-12.2297	-9.74573	-7.03514	-5.57252
									225.2	-15.7809	-15.5778	-15.0149	-13.7573	-12.2556	-9.78853	-7.09672	-5.57158
									225.1	-15.8378	-15.6074	-15.119	-13.7949	-12.284	-9.85694	-7.08583	-5.58036
									225	-15.8992	-15.6561	-15.1467	-13.8736	-12.3408	-9.90803	-7.08332	-5.60994
									224.9	-15.9887	-15.7437	-15.1909	-13.9479	-12.4038	-9.95236	-7.07186	-5.61362
									224.8	-15.994	-15.7868	-15.1966	-14.0625	-12.4544	-10.0331	-7.11609	-5.58849
									224.7	-15.9972	-15.856	-15.2565	-14.0953	-12.5637	-10.0676	-7.14221	-5.61086
									224.6	-16.0723	-15.8649	-15.281	-14.1317	-12.5908	-10.1198	-7.18275	-5.65988
									224.5	-16.0861	-15.9098	-15.3473	-14.1737	-12.664	-10.1765	-7.20485	-5.66968
									224.4	-16.1464	-15.9511	-15.4197	-14.2522	-12.7049	-10.2151	-7.2533	-5.69913
									224.3	-16.2322	-15.9626	-15.4305	-14.2935	-12.7193	-10.2125	-7.32161	-5.67359
									224.2	-16.2285	-16.0025	-15.4634	-14.3341	-12.7148	-10.2915	-7.34275	-5.66988
									224.1	-16.2804	-16.1036	-15.5041	-14.3578	-12.7237	-10.2968	-7.35211	-5.64741
									224	-16.2648	-16.1668	-15.5638	-14.3989	-12.8217	-10.3051	-7.32788	-5.66964
									223.9	-16.3768	-16.187	-15.5478	-14.427	-12.8655	-10.3147	-7.34089	-5.69456
									223.8	-16.4353	-16.2414	-15.5259	-14.4787	-12.9086	-10.3747	-7.38108	-5.6756
									223.7	-16.4722	-16.3114	-15.5585	-14.5134	-12.9614	-10.4028	-7.3706	-5.70965
									223.6	-16.543	-16.3639	-15.6468	-14.6085	-12.9806	-10.4438	-7.34549	-5.71057
									223.5	-16.573	-16.4236	-15.6827	-14.6254	-12.9803	-10.4962	-7.32578	-5.69559
									223.4	-16.5895	-16.5263	-15.728	-14.6857	-12.9105	-10.5413	-7.3484	-5.74479
									223.3	-16.6025	-16.6263	-15.7993	-14.6956	-12.9473	-10.5499	-7.40016	-5.75374
									223.2	-16.6143	-16.6725	-15.8693	-14.7109	-13.0125	-10.5706	-7.45125	-5.76547
									223.1	-16.6487	-16.6874	-15.9303	-14.7142	-13.0972	-10.535	-7.45907	-5.80101
									223	-16.6484	-16.736	-15.9259	-14.7237	-13.1132	-10.6065	-7.44317	-5.76019
									222.9	-16.6285	-16.7642	-15.928	-14.7935	-13.0818	-10.6928	-7.54906	-5.79161
									222.8	-16.6667	-16.8146	-15.8938	-14.8122	-13.1309	-10.6382	-7.55698	-5.80653
									222.7	-16.7002	-16.8822	-15.8971	-14.8541	-13.162	-10.6066	-7.56405	-5.85596
									222.6	-16.7504	-16.8884	-15.9057	-14.8587	-13.1754	-10.6737	-7.56681	-5.87232
									222.5	-16.753	-16.8655	-15.9151	-14.833	-13.171	-10.6472	-7.57191	-5.87535
									222.4	-16.719	-16.8425	-15.9406	-14.8227	-13.1642	-10.681	-7.55451	-5.86769
									222.3	-16.7224	-16.8405	-15.9058	-14.8002	-13.2003	-10.6575	-7.5432	-5.86332
									222.2	-16.7336	-16.8582	-15.8917	-14.8632	-13.2333	-10.6685	-7.5963	-5.84372
									222.1	-16.7975	-16.8773	-15.8759	-14.8636	-13.2895	-10.6387	-7.62582	-5.80611
									222	-16.8563	-16.8677	-15.8552	-14.8703	-13.2841	-10.6464	-7.66293	-5.85658
									221.9	-16.8811	-16.9346	-15.8873	-14.8793	-13.2872	-10.6752	-7.74443	-5.84088
									221.8	-16.8968	-16.9379	-15.8728	-14.8598	-13.3177	-10.6964	-7.76611	-5.8711
									221.7	-16.8931	-16.9591	-15.9062	-14.8575	-13.3443	-10.737	-7.77864	-5.89926
									221.6	-16.8715	-16.9837	-15.9534	-14.8799	-13.3986	-10.759	-7.81195	-5.88559
									221.5	-16.92	-16.9574	-15.9	-14.9643	-13.4346	-10.7578	-7.82123	-5.8852
									221.4	-16.8989	-16.9951	-15.8587	-15.0076	-13.4074	-10.7443	-7.80398	-5.87732
									221.3	-16.9181	-17.0219	-15.8447	-15.0252	-13.3765	-10.7453	-7.80319	-5.87301
									221.2	-16.9852	-17.006	-15.8195	-15.0295	-13.3591	-10.7372	-7.81676	-5.92042
									221.1	-16.9765	-17.0131	-15.7876	-15.0157	-13.3789	-10.7136	-7.86532	-5.88321
									221	-16.9566	-17.0514	-15.7435	-15.0452	-13.4221	-10.7267	-7.8908	-5.88444
									220.9	-16.9446	-17.0246	-15.7499	-15.0206	-13.4025	-10.6981	-7.91474	-5.85695
									220.8	-16.9663	-17.0367	-15.741	-15.0622	-13.4302	-10.7135	-7.93886	-5.91877
									220.7	-16.9071	-17.026	-15.7695	-15.0956	-13.4599	-10.7037	-7.98781	-5.94104
									220.6	-16.8971	-16.9612	-15.81	-15.0822	-13.4691	-10.641	-7.99231	-5.93432
									220.5	-16.8673	-16.9913	-15.8451	-15.103	-13.4088	-10.6399	-8.07943	-5.90092
									220.4	-16.8634	-17.0357	-15.8141	-15.1094	-13.3894	-10.6014	-8.12914	-5.89077
									220.3	-16.8759	-17.045	-15.8248	-15.1255	-13.3894	-10.5392	-8.12159	-5.94529
									220.2	-16.9007	-17.0333	-15.8186	-15.0682	-13.3785	-10.5466	-8.13916	-5.93821
									220.1	-16.906	-17.0017	-15.785	-15.0681	-13.3481	-10.5758	-8.14356	-6.01423
									220	-16.9073	-16.9853	-15.807	-15.0491	-13.3368	-10.6287	-8.13364	-6.05159
									219.9	-16.925	-16.9838	-15.8668	-15.0741	-13.3754	-10.6162	-8.16604	-6.03361
									219.8	-16.8994	-16.8996	-15.8749	-15.0326	-13.4215	-10.6553	-8.13132	-6.01858
									219.7	-16.8323	-16.915	-15.8942	-15.0673	-13.3924	-10.6797	-8.11442	-5.98286
									219.6	-16.8349	-16.8918	-15.8244	-15.1554	-13.4414	-10.7481	-8.10466	-5.99986
									219.5	-16.8495	-16.8816	-15.8397	-15.1343	-13.426	-10.7509	-8.13137	-5.96807
									219.4	-16.8199	-16.865	-15.9147	-15.1885	-13.3679	-10.7248	-8.12451	-6.00894
									219.3	-16.8216	-16.8707	-15.9364	-15.2316	-13.3391	-10.7309	-8.11239	-5.98668
									219.2	-16.8085	-16.8564	-15.9554	-15.2324	-13.4235	-10.7386	-8.15655	-5.97208
									219.1	-16.7711	-16.877	-15.9569	-15.1497	-13.3959	-10.7504	-8.20125	-5.88825
									219	-16.8086	-16.8577	-15.9919	-15.1411	-13.4092	-10.7667	-8.20441	-5.90794
									218.9	-16.7512	-16.8759	-15.9752	-15.1061	-13.3745	-10.7245	-8.24203	-5.93624
									218.8	-16.6921	-16.8369	-15.9558	-15.0831	-13.4299	-10.7899	-8.25144	-5.91747
									218.7	-16.6844	-16.8251	-15.935	-15.1029	-13.4829	-10.8378	-8.18515	-5.89217
									218.6	-16.7085	-16.7977	-15.959	-15.0743	-13.4936	-10.8158	-8.1878	-5.95118
									218.5	-16.6668	-16.7423	-15.9097	-15.0896	-13.5223	-10.7873	-8.17119	-5.93387
									218.4	-16.6445	-16.6747	-15.8846	-15.0339	-13.5312	-10.7466	-8.21687	-5.9771
									218.3	-16.6352	-16.6612	-15.9178	-15.0393	-13.5427	-10.7476	-8.18436	-5.95283
									218.2	-16.5787	-16.6307	-15.8939	-14.9795	-13.5642	-10.7148	-8.16169	-5.93205
									218.1	-16.5575	-16.6	-15.8765	-14.9654	-13.5689	-10.6881	-8.22416	-5.88251
									218	-16.5508	-16.5125	-15.8889	-14.9949	-13.6295	-10.6917	-8.23992	-5.86274
									217.9	-16.5062	-16.4988	-15.9241	-14.9803	-13.6259	-10.7063	-8.23916	-5.85247
									217.8	-16.4785	-16.4509	-15.9077	-15.0156	-13.6484	-10.6976	-8.19613	-5.82756
									217.7	-16.4425	-16.4013	-15.8638	-15.0298	-13.6349	-10.6141	-8.13547	-5.83138
									217.6	-16.4265	-16.3831	-15.8928	-14.9647	-13.6452	-10.6103	-8.12207	-5.83437
									217.5	-16.3659	-16.4061	-15.8553	-14.9637	-13.5933	-10.6253	-8.07226	-5.8877
									217.4	-16.3342	-16.3584	-15.8219	-15.0074	-13.6477	-10.6298	-8.04864	-5.85981
									217.3	-16.2829	-16.2908	-15.8284	-15.0356	-13.608	-10.6088	-8.06666	-5.86411
									217.2	-16.3158	-16.2958	-15.7837	-14.9825	-13.611	-10.6106	-8.08458	-5.82696
									217.1	-16.2439	-16.2745	-15.7495	-14.9421	-13.5993	-10.628	-8.04068	-5.80582
									217	-16.259	-16.2308	-15.6776	-14.9204	-13.6433	-10.6266	-8.03204	-5.81946
									216.9	-16.2361	-16.2823	-15.6835	-14.891	-13.6552	-10.6638	-8.03717	-5.88441
									216.8	-16.2016	-16.2605	-15.6774	-14.8527	-13.6643	-10.6335	-8.01589	-5.90881
									216.7	-16.1757	-16.2912	-15.6657	-14.8023	-13.6797	-10.6018	-7.96224	-5.9794
									216.6	-16.1863	-16.3073	-15.6608	-14.8197	-13.6868	-10.5766	-7.95881	-5.97742
									216.5	-16.1509	-16.2265	-15.6761	-14.8129	-13.6705	-10.5595	-7.96202	-5.97205
									216.4	-16.1314	-16.2245	-15.6946	-14.7516	-13.6275	-10.5392	-7.97231	-6.02386
									216.3	-16.1579	-16.2173	-15.6916	-14.7155	-13.6111	-10.5436	-7.95522	-6.07458
									216.2	-16.1219	-16.267	-15.6871	-14.7197	-13.5917	-10.5448	-8.00656	-6.0564
									216.1	-16.1228	-16.2811	-15.6531	-14.7131	-13.6045	-10.5882	-8.02501	-6.00728
									216	-16.1161	-16.2995	-15.6477	-14.6861	-13.6212	-10.6044	-8.03999	-6.02509
									215.9	-16.0965	-16.2827	-15.6414	-14.6597	-13.5843	-10.6426	-7.99212	-5.99348
									215.8	-16.0588	-16.2573	-15.6405	-14.6496	-13.5646	-10.6341	-7.98472	-5.95941
									215.7	-16.0287	-16.2379	-15.6609	-14.6777	-13.5639	-10.6825	-8.02663	-5.98552
									215.6	-16.0602	-16.2937	-15.7061	-14.7106	-13.5362	-10.6976	-8.05646	-5.97496
									215.5	-16.0511	-16.2854	-15.7309	-14.6926	-13.5167	-10.7736	-8.0397	-6.03539
									215.4	-16.0282	-16.2597	-15.7873	-14.6815	-13.4962	-10.7518	-8.04425	-6.08112
									215.3	-15.9981	-16.2599	-15.6868	-14.6608	-13.4997	-10.7991	-8.04897	-6.07181
									215.2	-15.9206	-16.243	-15.6012	-14.6351	-13.534	-10.7661	-8.1453	-6.10401
									215.1	-15.9214	-16.201	-15.6354	-14.6598	-13.5282	-10.7797	-8.21408	-6.1134
									215	-15.8729	-16.1536	-15.6402	-14.6612	-13.5534	-10.7563	-8.2082	-6.13064
									214.9	-15.9084	-16.117	-15.5888	-14.6223	-13.5907	-10.7507	-8.19806	-6.13906
									214.8	-15.8595	-16.0945	-15.5338	-14.6532	-13.6603	-10.7318	-8.17096	-6.15308
									214.7	-15.8713	-16.0826	-15.4519	-14.6756	-13.6971	-10.7764	-8.21659	-6.25795
									214.6	-15.8838	-16.0635	-15.4714	-14.7027	-13.6832	-10.8174	-8.25951	-6.2455
									214.5	-15.9002	-16.0263	-15.4621	-14.7575	-13.677	-10.815	-8.30407	-6.28818
									214.4	-15.9047	-15.9629	-15.4201	-14.7896	-13.6548	-10.8113	-8.25823	-6.24799
									214.3	-15.8534	-15.9752	-15.4123	-14.7825	-13.667	-10.8278	-8.28688	-6.20569
									214.2	-15.8299	-15.9954	-15.3595	-14.753	-13.6748	-10.8518	-8.27046	-6.14742
									214.1	-15.8034	-16.0134	-15.3388	-14.7779	-13.6642	-10.9047	-8.28608	-6.1609
									214	-15.8011	-16.0635	-15.345	-14.8375	-13.6801	-10.951	-8.30466	-6.24732
									213.9	-15.8313	-16.0436	-15.4134	-14.8607	-13.6296	-11.0181	-8.28912	-6.28135
									213.8	-15.8589	-16.0463	-15.399	-14.854	-13.6228	-11.0058	-8.35462	-6.2888
									213.7	-15.8014	-16.0346	-15.394	-14.8604	-13.6346	-11.0514	-8.38343	-6.37582
									213.6	-15.7814	-16.0674	-15.4418	-14.8833	-13.6461	-11.0818	-8.44589	-6.32017
									213.5	-15.7985	-16.1202	-15.4211	-14.924	-13.6488	-11.0703	-8.49082	-6.3773
									213.4	-15.7858	-16.1126	-15.4546	-14.9761	-13.7185	-11.0795	-8.48044	-6.36861
									213.3	-15.7988	-16.113	-15.4836	-14.9815	-13.6891	-11.1516	-8.51257	-6.3882
									213.2	-15.809	-16.0732	-15.5097	-14.9535	-13.6461	-11.1563	-8.5246	-6.44087
									213.1	-15.786	-16.1396	-15.5392	-14.897	-13.6488	-11.1378	-8.50591	-6.45381
									213	-15.799	-16.1251	-15.6587	-14.905	-13.6965	-11.1588	-8.56175	-6.49899
									212.9	-15.7954	-16.1306	-15.6714	-14.9513	-13.7706	-11.1931	-8.56913	-6.49793
									212.8	-15.7775	-16.1418	-15.6848	-14.9495	-13.8868	-11.2334	-8.57117	-6.55388
									212.7	-15.7792	-16.2384	-15.6782	-14.9571	-13.9171	-11.2653	-8.42991	-6.63885
									212.6	-15.7737	-16.2342	-15.7583	-14.9865	-13.8738	-11.2777	-8.40757	-6.76291
									212.5	-15.8115	-16.2224	-15.769	-15.015	-13.8102	-11.3307	-8.46364	-6.83053
									212.4	-15.7859	-16.2191	-15.7753	-14.9477	-13.8055	-11.3595	-8.43612	-6.85345
									212.3	-15.7716	-16.2419	-15.7858	-14.9579	-13.8203	-11.3735	-8.45132	-6.85421
									212.2	-15.7426	-16.3025	-15.7838	-14.9653	-13.852	-11.4654	-8.5705	-6.87707
									212.1	-15.7739	-16.2727	-15.7461	-15.0106	-13.8635	-11.5393	-8.54224	-6.90302
									212	-15.8267	-16.2633	-15.7406	-15.0464	-13.8951	-11.5907	-8.53608	-6.90281
									211.9	-15.8159	-16.3155	-15.7007	-15.0512	-13.917	-11.6201	-8.59584	-6.92129
									211.8	-15.8438	-16.355	-15.683	-15.0883	-13.9704	-11.6363	-8.64565	-6.8827
									211.7	-15.7984	-16.3297	-15.6945	-15.0793	-13.9523	-11.6284	-8.71051	-6.89611
									211.6	-15.8226	-16.3378	-15.6645	-15.1591	-13.9472	-11.6129	-8.70642	-6.95024
									211.5	-15.8568	-16.3417	-15.6941	-15.1655	-13.9581	-11.6916	-8.66739	-6.98797
									211.4	-15.8658	-16.4233	-15.6968	-15.2365	-13.9036	-11.684	-8.70521	-7.02131
									211.3	-15.8463	-16.4463	-15.7688	-15.2554	-13.9495	-11.668	-8.71726	-6.99261
									211.2	-15.8694	-16.3981	-15.8137	-15.2523	-14.021	-11.6601	-8.66995	-7.08266
									211.1	-15.9123	-16.4393	-15.8018	-15.3068	-14.0175	-11.6837	-8.76811	-7.09421
									211	-15.9589	-16.3972	-15.8129	-15.2615	-14.1116	-11.6886	-8.75068	-7.16638
									210.9	-16.0025	-16.3653	-15.7466	-15.2433	-14.1251	-11.6702	-8.79587	-7.19627
									210.8	-15.9652	-16.313	-15.7361	-15.338	-14.1565	-11.6699	-8.82188	-7.28688
									210.7	-15.9683	-16.2478	-15.7345	-15.3761	-14.0983	-11.7114	-8.83337	-7.26484
									210.6	-15.9768	-16.2791	-15.7779	-15.3584	-14.1781	-11.7498	-8.7907	-7.2966
									210.5	-16.0306	-16.3434	-15.8056	-15.4451	-14.1968	-11.7956	-8.83692	-7.29854
									210.4	-15.9728	-16.3282	-15.8324	-15.4487	-14.1397	-11.7829	-8.90268	-7.36222
									210.3	-15.9294	-16.3367	-15.7932	-15.3933	-14.0905	-11.8182	-8.8676	-7.39822
									210.2	-15.9311	-16.3695	-15.7892	-15.4246	-14.0979	-11.8438	-8.9784	-7.48635
									210.1	-15.8981	-16.3583	-15.7958	-15.4797	-14.1424	-11.835	-8.98899	-7.47599
									210	-15.8816	-16.2768	-15.7104	-15.4116	-14.1037	-11.8423	-9.04885	-7.42981
									209.9	-15.8501	-16.2736	-15.7237	-15.4404	-14.0927	-11.8401	-9.13833	-7.46301
									209.8	-15.8256	-16.3448	-15.6793	-15.3932	-13.9802	-11.8392	-9.14191	-7.39856
									209.7	-15.7974	-16.3785	-15.5682	-15.3315	-13.8926	-11.9238	-9.16857	-7.40633
									209.6	-15.7383	-16.355	-15.5159	-15.2369	-13.861	-11.9441	-9.18846	-7.47748
									209.5	-15.6842	-16.3421	-15.5373	-15.1993	-13.8872	-11.9784	-9.20403	-7.46225
									209.4	-15.6205	-16.2542	-15.4664	-15.1718	-13.8864	-11.9759	-9.23011	-7.44528
									209.3	-15.6817	-16.1631	-15.424	-15.1206	-13.8696	-11.9848	-9.33288	-7.54808
									209.2	-15.6121	-16.1	-15.4164	-15.0533	-13.7977	-11.9484	-9.37331	-7.59588
									209.1	-15.6129	-16.1149	-15.3843	-15.0214	-13.7727	-12.0168	-9.34452	-7.56332
									209	-15.534	-16.0496	-15.3385	-15.0402	-13.7174	-11.9358	-9.35677	-7.49397
									208.9	-15.5079	-15.9746	-15.2527	-15.0017	-13.6714	-11.9449	-9.36402	-7.52384
									208.8	-15.4608	-15.9475	-15.2283	-14.9554	-13.607	-11.9269	-9.38001	-7.61069
									208.7	-15.4464	-15.8962	-15.1463	-14.9642	-13.5195	-11.8506	-9.32833	-7.59181
									208.6	-15.3663	-15.8405	-15.1356	-14.9104	-13.4761	-11.8597	-9.35118	-7.55505
									208.5	-15.3258	-15.7817	-14.9955	-14.9489	-13.4613	-11.8757	-9.35272	-7.53812
									208.4	-15.2751	-15.777	-14.9588	-14.8369	-13.4086	-11.8875	-9.42113	-7.58803
									208.3	-15.1345	-15.6565	-14.8631	-14.755	-13.31	-11.8826	-9.33488	-7.59515
									208.2	-15.092	-15.538	-14.736	-14.7217	-13.2782	-11.7962	-9.36599	-7.67197
									208.1	-15.0324	-15.5285	-14.6681	-14.6428	-13.2198	-11.8249	-9.39774	-7.6212
									208	-14.8994	-15.4142	-14.619	-14.6027	-13.1762	-11.7506	-9.26631	-7.60083
									207.9	-14.7895	-15.3125	-14.5125	-14.5631	-13.0752	-11.693	-9.22342	-7.56811
									207.8	-14.6763	-15.1362	-14.4041	-14.4914	-13.0475	-11.6909	-9.28904	-7.73627
									207.7	-14.5754	-15.0358	-14.2745	-14.3609	-13.0502	-11.649	-9.31782	-7.72901
									207.6	-14.4777	-14.9973	-14.1684	-14.3051	-12.9457	-11.5118	-9.23572	-7.70162
									207.5	-14.4315	-14.903	-14.0252	-14.2943	-12.9128	-11.4876	-9.21564	-7.69442
									207.4	-14.2443	-14.7328	-13.8644	-14.1664	-12.7509	-11.4112	-9.2866	-7.72997
									207.3	-14.0591	-14.5434	-13.7217	-14.0941	-12.6796	-11.3458	-9.18511	-7.62841
									207.2	-13.905	-14.4896	-13.6198	-14.0741	-12.6498	-11.3496	-9.24794	-7.63551
									207.1	-13.7795	-14.3503	-13.497	-14.0034	-12.6158	-11.2488	-9.17675	-7.51407
									207	-13.7241	-14.1669	-13.4322	-13.8897	-12.4789	-11.2205	-9.22111	-7.42783
									206.9	-13.5732	-14.0822	-13.3039	-13.7249	-12.3119	-11.1766	-9.16749	-7.38503
									206.8	-13.4337	-14.0187	-13.1081	-13.6491	-12.2551	-11.1448	-9.01285	-7.35689
									206.7	-13.3227	-13.8426	-12.9282	-13.5627	-12.134	-11.06	-8.98519	-7.34369
									206.6	-13.2495	-13.7965	-12.8695	-13.5736	-12.0395	-11.0032	-8.98932	-7.30964
									206.5	-13.1386	-13.6291	-12.7802	-13.4185	-11.8704	-10.9632	-8.94224	-7.35721
									206.4	-13.0091	-13.4867	-12.6673	-13.2811	-11.6004	-10.826	-8.80309	-7.23626
									206.3	-12.8876	-13.367	-12.5584	-13.1039	-11.5028	-10.8101	-8.81213	-7.24
									206.2	-12.6459	-13.2532	-12.4189	-12.8684	-11.4214	-10.7913	-8.73473	-7.16753
									206.1	-12.5175	-13.0183	-12.1809	-12.6839	-11.2135	-10.5579	-8.58674	-7.30768
									206	-12.3458	-12.703	-11.9509	-12.4625	-10.973	-10.4022	-8.48553	-7.27986
									205.9	-12.2199	-12.4112	-11.81	-12.3342	-10.8545	-10.1254	-8.25581	-7.4658
									205.8	-12.0332	-12.1632	-11.625	-12.0466	-10.795	-9.97799	-8.24097	-7.26092
									205.7	-11.7425	-12.034	-11.3464	-11.8327	-10.6366	-9.81605	-8.12707	-7.1127
									205.6	-11.4211	-11.753	-11.1778	-11.4251	-10.3831	-9.74011	-8.06079	-7.11139
									205.5	-11.1264	-11.4355	-10.9896	-11.213	-10.1124	-9.51975	-7.79174	-7.11743
									205.4	-10.9153	-11.1095	-10.8283	-10.9916	-9.74539	-9.2881	-7.51181	-7.12677
									205.3	-10.6339	-10.8583	-10.5689	-10.7523	-9.42589	-9.13215	-7.17199	-7.27598
									205.2	-10.4266	-10.6295	-10.3249	-10.5847	-9.25355	-9.15513	-7.10498	-7.48555
									205.1	-10.2351	-10.4644	-10.1277	-10.4374	-9.09417	-9.08641	-7.04706	-7.40587
									205	-9.96756	-10.2985	-9.89494	-10.1975	-8.80372	-8.68729	-7.01469	-7.56868
									204.9	-9.81653	-10.1414	-9.71045	-9.96987	-8.55576	-8.48534	-6.95746	-7.46447
									204.8	-9.71931	-9.95432	-9.49567	-9.77879	-8.34341	-8.4504	-6.94512	-7.61088
									204.7	-9.44129	-9.73149	-9.27213	-9.55768	-8.07144	-8.38949	-6.75326	-7.42908
									204.6	-9.28963	-9.51986	-9.11402	-9.47011	-7.99795	-8.28839	-6.85047	-7.70368
									204.5	-9.10027	-9.3379	-8.8958	-9.37077	-7.79605	-8.12546	-6.92039	-7.50621
									204.4	-8.84698	-9.08478	-8.69477	-9.07054	-7.5109	-8.04799	-6.86914	-7.24904
									204.3	-8.64072	-8.84448	-8.39405	-8.77838	-7.45637	-8.01536	-6.51191	-6.7238
									204.2	-8.48573	-8.64324	-8.20309	-8.74317	-7.32688	-7.84485	-6.62144	-6.92214
									204.1	-8.19667	-8.35175	-7.86761	-8.42212	-7.24537	-7.89776	-6.80355	-6.73056
									204	-7.95942	-7.99386	-7.53915	-8.21949	-6.87401	-7.73066	-6.26218	-6.65979
									203.9	-7.75638	-7.74277	-7.26607	-7.97683	-6.77684	-7.58648	-5.92508	-6.61123
									203.8	-7.52027	-7.4616	-7.03472	-7.68225	-6.58218	-7.37749	-5.64712	-6.09372
									203.7	-7.20371	-7.02179	-6.81336	-7.26471	-6.41661	-7.11254	-5.42466	-6.76446
									203.6	-6.84812	-6.65553	-6.48669	-6.93905	-5.95658	-7.01807	-5.27681	-6.33047
									203.5	-6.5967	-6.4249	-6.1275	-6.69734	-5.70972	-6.56665	-4.89828	-5.86269
									203.4	-6.22457	-6.19093	-5.83803	-6.34655	-5.76213	-6.11738	-4.98241	-4.84029
									203.3	-5.84767	-5.74179	-5.43475	-5.94954	-5.42893	-6.08463	-5.04659	-5.33861
									203.2	-5.53428	-5.41993	-5.16363	-5.75961	-5.00298	-6.07839	-4.77929	-5.0534
									203.1	-5.15367	-5.10561	-4.83173	-5.36632	-4.5076	-5.80874	-4.992	-5.34582
									203	-4.75552	-4.7024	-4.53117	-5.14044	-4.53932	-5.82938	-4.98074	-5.61432
									202.9	-4.25466	-4.26148	-4.05698	-4.85677	-3.87209	-5.52521	-4.36497	-5.34883
									202.8	-3.94071	-3.8757	-3.75641	-4.44553	-3.47344	-5.62123	-2.89156	-5.02231
									202.7	-3.58934	-3.56574	-3.38397	-3.97807	-3.22732	-5.10284	-4.16064	-4.97473
									202.6	-3.08737	-3.10017	-2.96976	-3.53852	-2.90932	-5.10157	-3.67881	-4.70468
									202.5	-2.69027	-2.89571	-2.52462	-3.19913	-2.5528	-4.47465	-3.72818	-4.67483
									202.4	-2.19974	-2.40232	-1.96037	-2.64963	-2.43086	-4.15301	-3.77349	-4.23413
									202.3	-1.8285	-2.03512	-1.33887	-2.62562	-1.85303	-3.96999	-3.39171	-4.82995
									202.2	-1.38173	-1.65812	-0.786514	-2.43185	-1.64392	-3.32467	-2.78208	-4.77411
									202.1	-1.01668	-1.39246	-0.440434	-1.83066	-1.35076	-3.00775	-2.06896	-4.70256
									202	-0.627927	-1.03823	-0.051622	-1.49098	-1.06261	-2.35487	-1.97402	-4.38148
									201.9	-0.185138	-0.592688	0.157964	-0.742929	-0.746208	-1.80703	-1.12823	-5.44873
									201.8	0.18294	-0.1467	0.51883	-0.0580255	-0.894843	-1.48316	-1.26552	-5.58191
									201.7	0.646014	0.539352	0.903643	0.182743	-0.447382	-1.29811	-0.971042	-5.39361
									201.6	1.02903	0.995086	1.32427	0.511871	-0.418225	-1.02192	-1.00966	-6.5269
									201.5	1.41183	1.36965	1.60926	0.925605	-0.398332	-0.0757789	-0.812534	-6.39507
									201.4	1.82639	1.88116	2.02754	1.21309	-0.478032	0.728313	-0.928023	-6.7294
									201.3	2.14564	2.29021	2.61108	1.86362	0.26191	0.366228	-1.62292	-6.47211
									201.2	2.52997	2.72912	2.79892	2.62963	-0.0397963	-0.90697	-1.64731	-6.14561
									201.1	3.09009	3.0901	3.448	2.82226	0.612846	-1.41451	-0.8325	-5.21561
									201	3.38037	3.49919	3.93203	3.05422	1.0958	-1.23181	0.185042	-4.80987
									200.9	3.9204	3.9513	4.30353	3.03799	0.835033	-0.77854	0.311531	-5.20498
									200.8	4.41066	4.28255	4.39714	3.65642	1.83409	-1.38764	-0.00754456	-3.4398
									200.7	4.86931	4.4681	4.38808	3.9626	0.937364	-1.29999	0.645353	-4.68963
									200.6	5.342	5.0064	4.73319	5.09348	1.69465	-1.50474	1.38114	-4.88133
									200.5	5.85102	5.62968	5.04154	4.9697	2.104	-0.134835	2.05189	-5.74946
									200.4	6.31689	6.14722	5.93053	4.99378	2.02424	0.368842	2.13953	-5.77778
									200.3	6.68015	6.62803	6.02941	5.28714	2.44582	0.124633	2.73258	-4.5532
									200.2	7.25524	7.14035	6.6791	5.67513	2.71348	1.36743	2.48745	-4.58029
									200.1	7.43593	7.75894	6.77791	6.93889	4.18341	0.448936	2.88073	-4.78214
									200	7.78469	8.3037	6.91597	6.74352	5.15042	1.47515	2.81625	-4.6663
									199.9	8.02407	8.83755	6.83935	6.04418	5.21198	2.53916	2.84725	-4.32324
									199.8	8.37327	9.41137	7.62795	6.06097	5.01304	1.6837	2.79692	-3.83379
									199.7	8.47866	9.81502	7.5663	5.93493	5.68979	1.46319	2.86072	-3.85854
									199.6	8.98786	9.73817	7.27413	6.63853	5.35253	1.78792	3.83957	-3.82983
									199.5	9.41594	10.2764	7.53199	7.13568	5.98957	2.31265	3.90854	-3.63359
									199.4	9.86556	10.9582	7.9227	7.49355	6.01205	1.95705	3.8115	-2.15816
									199.3	10.0635	10.3971	8.20753	9.11858	6.08546	2.29381	2.18451	-2.52642
									199.2	10.129	11.4597	8.69374	7.16222	6.56455	2.63497	1.59481	-2.99337
									199.1	10.798	11.9521	8.2719	6.83997	7.60046	3.38789	0.594752	-3.51241
									199	11.3458	12.1467	7.97074	8.20393	8.02145	3.89298	-0.0195718	-4.02633
									198.9	11.6551	12.7408	8.9121	8.3689	8.13069	4.67371	0.487024	-4.4583
									198.8	12.0564	12.7572	8.92762	9.25603	7.28019	5.11731	-0.175456	-4.34361
									198.7	12.512	12.9414	9.79413	9.2999	7.37946	6.2892	0.370914	-4.08096
									198.6	12.6078	12.6809	9.36462	9.06946	6.73243	6.02087	-0.715145	-3.52835
									198.5	13.4942	12.6625	9.00881	7.42528	6.79442	5.86717	-0.834021	-4.27262
									198.4	14.2098	11.9437	8.02336	7.31357	6.36085	6.81797	-0.506523	-4.22384
									198.3	14.6275	11.6123	8.21991	6.90586	6.34866	7.48401	-1.6112	-4.18588
									198.2	14.6862	11.8879	7.7958	7.3733	8.24428	7.5162	-2.15071	-5.19618
									198.1	15.4325	12.7982	6.84292	7.05964	8.4541	7.28176	-2.06739	-5.41665
									198	15.5445	13.2992	6.70537	7.52242	9.05097	8.25035	-3.24056	-4.67053
									197.9	15.1574	13.3594	6.88337	6.97738	8.65691	8.94324	-4.26323	-4.76964
									197.8	14.9966	12.5248	7.34715	6.82999	8.63317	9.19337	-4.66243	-4.69804
									197.7	14.6211	13.4321	6.17017	7.63379	8.30997	8.7852	-4.84202	-2.90275
									197.6	14.9437	14.1541	6.73819	8.12326	8.58306	9.20763	-4.68477	-2.70743
									197.5	15.1734	13.6765	7.58255	7.46306	9.54154	9.7836	-4.52061	-3.40934
									197.4	15.2182	13.7621	5.74888	7.2765	8.59975	10.0907	-4.30549	-3.68934
									197.3	15.7702	13.1541	6.46444	6.75852	9.10101	10.8682	-4.63102	-3.98716
									197.2	15.5213	13.0513	5.98491	6.00589	9.35023	11.441	-4.26033	-4.04156
									197.1	15.6872	12.9216	5.60045	6.50974	8.90853	10.8561	-4.33009	-2.83489
									197	14.7946	12.1354	5.79579	4.69393	9.26316	11.04	-5.27804	-4.19138
									196.9	15.2288	11.9688	5.48354	4.64011	9.19453	11.8229	-5.91007	-3.74293
									196.8	15.7752	11.7566	6.01968	5.00868	9.00803	11.0572	-5.43578	-4.018
									196.7	16.1355	11.5692	6.01611	4.58186	9.31519	12.0761	-5.14771	-3.89118
									196.6	16.7785	12.0994	6.85909	5.48561	8.70451	11.0936	-5.46454	-2.80545
									196.5	16.6795	11.4417	6.16118	4.94467	8.76035	10.6614	-5.17922	-2.89195
									196.4	14.9487	11.3692	6.38736	6.06906	8.5686	11.1368	-4.95191	-3.78771
									196.3	14.9297	11.3944	6.78662	6.71521	8.38926	10.9353	-4.82803	-4.20653
									196.2	14.4094	10.5073	8.52147	7.25933	10.0111	11.4106	-4.42885	-3.88631
									196.1	14.3194	11.3679	7.59729	7.32018	10.3581	12.3778	-4.59429	-3.89046
									196	14.4339	10.3319	7.7576	7.29133	9.91541	11.9606	-5.15962	-4.17454
									195.9	14.6793	10.0607	7.42756	6.90972	8.32285	11.3999	-4.10278	-4.04869
									195.8	13.5932	9.55883	8.39642	7.35802	6.94037	11.449	-5.00545	-4.24
									195.7	12.3639	8.9124	7.50592	6.76943	7.18135	11.397	-2.68218	-4.85853
									195.6	12.145	8.63836	6.81636	7.17952	7.42935	10.7102	-2.3225	-4.09832
									195.5	11.9828	9.05769	7.47585	8.32596	8.2201	9.72251	-1.69385	-4.28323
									195.4	12.4905	7.71665	6.75271	8.58377	6.97489	10.5131	-2.9766	-4.8986
									195.3	12.9921	7.11097	6.52688	8.41387	7.76731	9.43501	-2.88056	-4.44572
									195.2	11.952	6.63645	3.80633	6.68134	7.68651	9.60676	-1.98943	-5.54705
									195.1	12.1246	6.5029	3.79611	6.96889	6.49789	9.39533	-0.670534	-4.26132
									195	11.6498	7.02457	2.53087	7.04241	5.0967	8.39256	-1.70298	-3.58628

[truncated: 4 more sheets: F-ECM04, aBFL1, B-ECM01, aBCLB]
