# Supplementary material for: Computationally designed high specificity inhibitors delineate the roles of BCL2 family proteins in cancer
Source: eLife. 2016 Nov 2;5:e20352. doi: 10.7554/eLife.20352 (PMC5127641; doi:10.7554/eLife.20352)
Supplement: Figure 5—source data 1. — Enrichment ratios of all SSM mutants, calculated from deep sequencing of naïve and sorted populations of SSM libraries based on the indicated CDP. Raw data have been deposited in the National Center for Biotechnology Information Gene Expression Omnibus repository with accession number GSE80194. DOI: http://dx.doi.org/10.7554/eLife.20352.012 [file elife-20352-fig5-data1.xlsx]

## Sheet: Readme
	The following data are represented in Figure 5 and Figure 5-supplement 1.
	Heatmaps (Fig 5-supplement 1A) represent the enrichment ratios found in each spreadsheet, and comparison of designed residues' enrichment ratios to the average per position (Figure 5—figure supplement 1B) are calculated below.

## Sheet: 2-CDP06
Enrichment ratios (e) below were calculated from deep sequencing data, according to the following equation:
e = log2([(mutant counts in sorted population)/(mutant counts in naïve library)]/[(WT counts in sorted population)/(WT counts in naïve library)])
Raw data (fastq files) and annotated analyzed data can be found at:
http://www.ncbi.nlm.nih.gov/geo/query/acc.cgi?acc=GSE80194
ND = no data
WT e highlighted in yellow
Construct name:	2-CDP06
Residue number	1	2	3	4	5	6	7	8	9	10	11	12	13	14	15	16	17	18	19	20	21	22	23	24	25	26	27	28	29	30	31	32	33	34	35	36	37	38	39	40	41	42	43	44	45	46	47	48	49
WT sequence	A	D	P	K	K	V	L	D	K	A	K	D	E	A	E	N	R	V	R	E	L	K	Q	K	L	E	E	L	Y	K	E	A	R	K	L	D	L	T	Q	E	M	R	Q	E	L	V	D	K	A
Optimized design sequence	A	D	P	K	K	V	L	D	K	A	K	D	E	A	E	N	R	V	R	E	L	K	Q	R	L	E	E	L	Y	K	E	A	R	K	L	D	L	T	Q	E	M	R	Q	E	L	V	D	K	A
A	0.0627784	0.23036	0.574059	-5.4121	-1.94789	-1.48122	-4.85779	-2.7035	-3.3571	0.0627784	-5.65732	-2.97985	-1.56805	0.0627784	-3.02255	-2.38272	-1.00754	-2.3898	-3.47414	0.101688	-7.83816	-3.47465	-3.75491	-6.24825	-5.3893	-3.38186	-1.51022	-9.39874	-1.8098	-6.04718	-3.40982	0.0627784	-3.78978	-6.04065	-2.16054	-2.42968	-0.902814	-0.666426	-4.06763	-4.1922	-2.42531	-5.49433	-6.54456	-3.00476	-4.35259	-0.652848	-2.04461	-5.68422	-0.29635
C	ND	ND	-2.58496	-4.09802	-6.61796	-7.46761	0.919555	-1.1275	-2.79047	-0.44432	-7.29219	-7.61471	-3.83756	1.05487	-8.67596	-2.01535	-0.966074	-7.41652	-1.01197	1.4185	-7.81156	-8.21431	-8.29921	-7.91512	-3.06766	-2.15083	-4.49522	-7.05206	-0.662087	-2.7987	-8.60733	-4.39876	-1.51379	-8.47978	-8.02509	-2.20128	-7.59166	-6.45468	-1.87863	-2.29808	-6.44712	-1.45261	-6.96645	-7.38401	-7.51524	0.464003	-0.339507	-7.7238	-7.2461
D	ND	0.0627784	-1.58497	-3.61796	-0.46547	-0.585598	0.211489	0.0627784	-2.60527	-7.21917	-7.88874	0.0627784	-2.27053	0.0632092	-1.96107	-1.95576	-7.56986	-2.96519	-8.04439	-1.03655	-8.00562	-6.75686	-5.47276	-7.17711	-8.10329	-1.97382	-2.57548	-6.78136	-2.73746	-5.83156	-3.15554	-1.97301	-7.85798	-7.35799	-3.59267	-0.166451	-7.65914	-7.53203	-7.03521	-0.986125	-7.95807	1.40145	-5.54427	-1.4364	-6.90796	0.855861	-0.166451	-7.34895	-3.65036
E	0.377201	0.145215	-9.71037e-07	-0.96743	-0.140333	-7.10852	-6.87037	-1.81203	0.058757	-2.47034	-1.77579	0.188547	0.0627784	-2.76381	0.0627784	-8.43463	-3.82966	-8.65821	-7.6064	0.0627784	-3.2333	-2.52514	-3.94112	-2.11033	-7.51458	0.0627784	0.0627784	-8.36194	-5.8878	-0.974962	0.0627784	-6.65209	-8.44708	-2.01446	0.932111	-0.870048	1.46275	-6.49448	-2.99764	-0.166451	-7.79577	-8.41965	-2.16301	-0.166451	-4.06401	2.72136	-1.2893	-2.15556	-1.94384
F	ND	ND	-0.999999	-7.69349	-6.64386	-2.48484	-4.20633	-4.40576	-1.50868	5.93791	0.260417	-5.93374	-0.718236	3.7496	0.72189	-3.61796	-1.08403	-1.87073	-5.21312	2.50769	0.996636	-5.21988	-1.33518	-8.08747	0.599904	-6.74147	-5.27282	-1.93784	-1.59509	-7.88874	-7.56224	1.20931	-6.82018	-5.51458	-7.34824	-4.05532	-6.16641	-6.65328	-7.15311	-7.05073	-3.99382	-6.099	-6.34367	-6.27805	-6.06609	-0.217599	2.39612	-2.65568	-6.52339
G	0.0190909	-0.174403	-2.2333	-4.25379	-8.50839	-1.47654	-2.05153	-3.30834	-2.73471	-4.09017	-0.991377	-2.9022	-2.81863	-1.35978	-1.54402	-6.61924	-1.70388	-1.45363	-4.36636	2.72585	-6.21602	-2.11297	-4.84711	-6.97968	-2.68908	-2.9853	-1.48204	-7.57117	0.373374	-2.53765	-2.84049	-3.78136	-1.32773	-4.44838	-1.48084	-2.90583	-2.91062	-8.05488	-2.46608	-2.14973	-2.75132	-4.79456	-5.95771	-2.59613	-5.10245	-0.164832	-2.23334	-8.9315	-0.752873
H	ND	-0.362932	-2.32193	0.98355	-6.37504	-3.1719	-4.99411	-1.75228	-7.5469	-7.02237	-6.09679	-0.902907	0.363841	-0.541419	-6.58693	-2.14679	-1.6965	-6.65821	-1.22501	3.04175	-6.34877	-7.16992	-2.26091	-5.51458	-1.45765	-6.24793	3.16458	-1.63972	-0.749513	-7.40088	-7.57743	-7.32193	-1.56708	-7.82655	1.12549	-2.57916	-7.11637	-7.18362	-0.713105	-2.58447	-7.6717	0.598994	-0.765287	-5.38036	-1.3969	1.32301	-0.96302	-7.02173	4.53361
I	ND	ND	-0.999999	-3.04943	-3.08129	-1.06337	-5.35755	-1.93438	-2.09764	-0.256016	-1.26304	-1.97898	-7.45943	-0.353764	-4.3113	-1.06337	-6.43841	-1.44446	-4.66328	2.80282	-3.24217	-2.95414	-5.4121	-2.82587	-0.779578	-6.78136	-0.326406	-0.598922	-7.16992	-2.70723	-7.61471	1.44958	-7.06609	-2.55015	-0.600378	-4.18792	-6.73437	-0.902167	-6.8238	-5.96447	-1.40006	-7.63175	-6.28925	-6.59015	-3.94231	-5.99017	2.58488	-2.42172	-6.54487
K	ND	-9.71037e-07	-9.71037e-07	0.0627784	0.0627784	-5.28541	-5.42627	-5.80735	0.0627784	-5.70044	0.0627784	-6	0.362045	-6.498	-1.49221	0.130978	-0.575577	-7.47573	-1.84359	1.01133	6.02567	0.0627784	-0.237326	0.0627784	3.21982	-1.107	-1.43618	-3.69758	-7.36632	0.0627784	-2.65875	-7.5157	-7.43463	0.0627784	-1.98849	-4.43012	-2.20409	-2.02378	-1.88711	-2.74248	-2.17029	-1.95688	-0.773998	-1.61955	-0.690845	0.493148	-5.31121	-0.166451	5.79612
L	ND	ND	-0.21127	-3.39044	-1.82024	-3.06746	0.0627784	-0.564565	-4.1526	3.18744	-1.52804	-5.91199	-3.14051	1.49441	-2.75289	-3.45814	-2.38364	-4.7149	-3.44472	1.29112	0.0627784	-8.55923	-4.136	-4.13215	0.0627784	-3.45569	-2.55751	0.0627784	-2.84325	-8.51664	-2.57794	2.38255	-2.09085	-3.80106	-0.111637	-6.36822	-0.166451	-5.51993	-1.87072	-5.02173	-2.63185	-2.81439	-3.02255	-0.851769	-0.166451	-0.363788	4.48371	-7.82598	-1.02616
M	ND	ND	ND	-3.1964	1.05911	-6.30378	-1.3546	-6.63323	-7.21917	3.13677	-0.267385	-6.55459	-7.65105	3.74858	-2.90983	-5.16491	-6.90886	0.149477	-1.15083	1.11994	0.846992	-8.11894	-1.82418	-4.27769	-3.37873	1.18174	-6.10229	-6.60253	-7.87037	-7.75489	-0.709474	0.672252	-7.37504	-3.12226	-2.45076	-5.39741	-0.854281	-6.98472	-7.27885	-4.26632	-0.166451	-5.25191	-5.60879	-1.97297	-0.760115	1.25714	0.658478	-7.66468	-2.31062
N	ND	0.0886318	ND	-0.913231	-1.07773	-5.04439	-4.75488	-0.0948495	-2.59587	-5.64386	-0.635623	-0.691402	-6.93074	-6.14019	-2.18311	0.0627784	0.660994	-4.28576	-6.37625	4.41192	-5.36715	-0.0144617	-6.61471	-1.17627	-3.89626	-6	-6.18982	-0.455689	-2.32076	0.559559	-6.40322	-6.37504	-6.55459	-1.10459	-2.35767	-0.142745	-6.53993	-0.482154	-6.57415	-7.34605	-3.16398	-5.59277	-6.14917	-5.88129	-6.34596	1.59834	-1.3042	-2.68965	0.555493
P	0.106554	ND	0.0627784	-7.24793	-5.2532	-7.62205	-1.74207	-5.02144	-4.85964	-0.345265	-2.97026	1.60569	-7.33016	-0.992288	-1.04703	-1.24109	-3.70448	3.41719	1.38064	-5.12226	-2.25602	-5.48544	1.85112	-4.77609	-2.32038	-7.53916	-8.56986	-2.55814	-1.40193	-5.114	-3.23678	-3.24251	-2.62922	-4.498	-0.394255	-3.96132	-1.28552	-3.06659	-0.487716	-6.69739	-1.10496	-0.959754	-2.25808	-3.73317	-2.3268	-4.76123	-3.71073	-3.65736	-1.04981
Q	ND	ND	0.395059	-1.86211	-0.986502	-6.49185	-1.03912	-2.17885	-0.73265	-4.56587	-0.450675	-4.81826	-1.87644	-1.22024	-1.53871	-4.09312	-8.23841	-7.75489	-6.83156	-1.80911	-1.67556	-3.71768	0.0627784	-1.10124	-3.67808	-2.5689	-1.03966	-4.34136	-5.40915	-4.29494	-3.03146	-7.0746	-6.87073	-3.5821	-2.51887	-3.53414	-1.52144	-7.63048	-0.166451	-3.536	-7.36664	0.204232	-0.166451	-1.23694	-1.11908	-1.01135	-4.62273	-2.33676	0.653279
R	ND	ND	-0.956456	-1.24201	-1.79353	-9.14211	-1.46744	-1.12935	-1.05483	-3.11922	-2.54928	-3.50078	-0.0989952	-6.12946	-5.80484	-0.279532	0.0627784	-2.15695	0.0627784	2.51703	2.03802	-2.22943	0.0357085	4.32368	4.30245	-4.46576	0.0766426	-1.32588	-3.66214	-3.04041	-0.945108	-0.894519	0.0627784	-3.74672	-3.27735	-2.0363	-2.37548	-0.904836	-2.6835	-5.34396	-0.672054	-0.166451	-2.0008	-1.60293	-4.48897	1.36317	-4.61785	-2.59299	5.75719
S	0.171845	-0.385299	0.056923	-3.48002	-1.4641	-2.15959	-8.31741	-9.04166	-4.16618	-0.939921	-0.862644	-8.5078	-2.49492	-2.93784	-0.210213	-2.07336	-1.57602	-2.08223	-1.77001	1.66549	-3.62561	-6.35569	-1.87073	-6.49299	-2.51305	-8.53527	-3.95576	-4.68396	-4.73362	-5.04481	-2.70614	-1.07914	-2.2459	-2.39364	-1.78039	-4.38253	-4.73882	-2.93922	-2.82314	-8.40698	-2.23232	-3.47563	-7.77928	-8.16415	-8.89559	-2.12792	-6.70554	-8.71765	-1.82609
T	0.321293	-9.71037e-07	0.670349	-1.82994	-1.79129	-7.08746	-6.59991	-7.84549	-0.711899	-0.352048	-2.12896	-6.93074	-2.65974	-1.74008	-4.60031	-3.58065	-1.65875	-1.10541	-2.21312	1.26909	-2.05821	-4.67387	-8.22401	-4.22965	-3.42594	0.95769	-5.02685	-8.14975	-7.37625	-5.64231	-0.215374	-0.782635	-6.2532	-4.09207	-0.317009	-5.76801	-7.04237	-0.166451	-8.07656	-1.49481	-2.37445	-5.83766	-7.46747	-4.52102	-2.12524	0.702901	-4.57613	-1.43455	0.398814
V	0.185988	0.112479	-0.999999	-3.00741	-8.45533	0.0627784	-2.50129	-1.2765	-0.894494	2.2649	-3.94413	-2.87073	-0.204464	-1.49138	-2.78053	-5.02453	-1.03491	0.0627784	-7.98967	0.521591	-0.0778708	-7.78276	-1.19734	-6.56322	-6.03491	-2.2955	-2.50394	-3.82678	-2.79928	-1.10339	-1.38071	-0.219999	-5.2496	-9.53138	-2.96197	0.109638	-0.725254	-8.37069	-3.83319	-0.964146	-3.05145	-3.12918	0.969532	-2.77735	-0.857392	-0.166451	0.843664	-5.7728	-2.0678
W	ND	ND	ND	-6.57907	-5.77073	-8.12412	-1.33639	1.04025	-1.6769	0.824478	-7.85453	-4.84473	-2.70419	3.05853	-8.87036	-0.219876	-5.68176	-5.37928	-3.51775	-2.43261	-2.2201	-8.1614	0.307213	-6.28012	3.27422	-5.15083	0.168802	-4.05368	-5.0746	-6.50908	0.0754565	2.94786	-8.5812	-8.79117	-5.33271	-6.09225	-2.21122	-4.82422	-7.90732	-2.68567	-2.47191	-8.30278	-5.04396	0.426302	-8.62399	-0.82548	6.24724	-2.99455	3.38784
Y	ND	0.566517	ND	-3.57117	-4.58693	-6.35755	-0.648334	-0.831053	-5.15083	-1.85593	-6.94251	-1.0109	-7.24793	-6.00589	-5.85127	0.291294	-4.24129	-4.44708	-7.74819	1.03065	4.63707	-6.96579	-3.97026	-7.71425	4.82895	-6.26679	-6.74147	-6.40939	0.0627784	-7.26679	-5.47276	1.11306	-6.65821	-7.79442	0.71412	-0.970375	-7.21859	-5.43294	-5.52744	-7.41403	-3.58015	-0.222825	-5.72542	-2.42097	-6.7911	-3.24349	-0.0234474	-6.61314	2.8183
STOP	ND	ND	-9.71037e-07	0.559	-1.52849	-3.21312	-5.10777	-3.80753	0.351	-6.80736	-1.45219	-6.47573	-2.12226	0.951	-0.14369	-2.00197	1.074	-8.08747	-4.00197	-1.50234	-4.58065	-2.84035	-1.43359	-4.71545	-5.61796	-1.91461	-1.89069	-7.62205	-1.64833	-2.88051	-1.72806	-0.814692	-7.08746	-3.60253	-0.502185	-7.96675	-6.15881	0.936628748355	0.433427219455	-1.82508	-2.16535	-3.54979	-1.30211	-1.28908	0.241483329881	-6.81156	-1.16432	0.542349809235	-4.76105
CDP e	0.0627784	0.0627784	0.0627784	0.0627784	0.0627784	0.0627784	0.0627784	0.0627784	0.0627784	0.0627784	0.0627784	0.0627784	0.0627784	0.0627784	0.0627784	0.0627784	0.0627784	0.0627784	0.0627784	0.0627784	0.0627784	0.0627784	0.0627784	0.0627784	0.0627784	0.0627784	0.0627784	0.0627784	0.0627784	0.0627784	0.0627784	0.0627784	0.0627784	0.0627784	-0.111637	-0.166451	-0.166451	-0.166451	-0.166451	-0.166451	-0.166451	-0.166451	-0.166451	-0.166451	-0.166451	-0.166451	-0.166451	-0.166451	-0.29635
Optimized e	0.0627784	0.0627784	0.0627784	0.0627784	0.0627784	0.0627784	0.0627784	0.0627784	0.0627784	0.0627784	0.0627784	0.0627784	0.0627784	0.0627784	0.0627784	0.0627784	0.0627784	0.0627784	0.0627784	0.0627784	0.0627784	0.0627784	0.0627784	4.32368	0.0627784	0.0627784	0.0627784	0.0627784	0.0627784	0.0627784	0.0627784	0.0627784	0.0627784	0.0627784	-0.111637	-0.166451	-0.166451	-0.166451	-0.166451	-0.166451	-0.166451	-0.166451	-0.166451	-0.166451	-0.166451	-0.166451	-0.166451	-0.166451	-0.29635
Average e	0.177821	0.0257587	-0.695857	-3.21828	-3.2829	-4.57313	-3.11658	-2.81826	-2.78671	-1.43053	-3.03881	-3.60486	-3.01114	-1.24711	-3.26792	-2.6443	-2.97879	-3.43148	-3.85235	0.854936	-2.26845	-5.02149	-3.05705	-4.46078	-1.89802	-3.77226	-2.81564	-4.46918	-3.55166	-4.49259	-3.49835	-2.0737	-5.0135	-4.83136	-2.19636	-3.11847	-3.7251	-4.61438	-4.11257	-4.06559	-3.57148	-3.46987	-4.28003	-3.35961	-4.12695	-0.437311	-1.0347	-4.82049	-0.566881
Maximum e	0.377201	0.566517	0.670349	0.98355	1.05911	0.0627784	0.919555	1.04025	0.0627784	5.93791	0.260417	1.60569	0.363841	3.7496	0.72189	0.291294	0.660994	3.41719	1.38064	4.41192	6.02567	0.0627784	1.85112	4.32368	4.82895	1.18174	3.16458	0.0627784	0.373374	0.559559	0.0754565	2.94786	0.0627784	0.0627784	1.12549	0.109638	1.46275	-0.166451	-0.166451	-0.166451	-0.166451	1.40145	0.969532	0.426302	-0.166451	2.72136	6.24724	-0.166451	5.79612
Minimum e	0.0190909	-0.385299	-2.58496	-7.69349	-8.50839	-9.14211	-8.31741	-9.04166	-7.5469	-7.21917	-7.88874	-8.5078	-7.65105	-6.498	-8.87036	-8.43463	-8.23841	-8.65821	-8.04439	-5.12226	-8.00562	-8.55923	-8.29921	-8.08747	-8.10329	-8.53527	-8.56986	-9.39874	-7.87037	-8.51664	-8.60733	-7.5157	-8.5812	-9.53138	-8.02509	-6.36822	-7.65914	-8.37069	-8.07656	-8.40698	-7.95807	-8.41965	-7.77928	-8.16415	-8.89559	-5.99017	-6.70554	-8.9315	-7.2461
Max - Av	0.19938	0.540758	1.36621	4.20183	4.34201	4.63591	4.03613	3.85851	2.84949	7.36844	3.29922	5.21055	3.37499	4.99671	3.98981	2.93559	3.63979	6.84867	5.23298	3.55699	8.29412	5.08427	4.90818	8.78446	6.72697	4.954	5.98022	4.53196	3.92503	5.05215	3.57381	5.02155	5.07628	4.89414	3.32184	3.22811	5.18785	4.44793	3.94612	3.89914	3.40503	4.87132	5.24957	3.78591	3.9605	3.15867	7.28194	4.65404	6.363
Min - Av	-0.158731	-0.411058	-1.8891	-4.47521	-5.22549	-4.56898	-5.20083	-6.2234	-4.76018	-5.78864	-4.84994	-4.90293	-4.63991	-5.25089	-5.60244	-5.79033	-5.25961	-5.22674	-4.19205	-5.9772	-5.73717	-3.53774	-5.24216	-3.62669	-6.20527	-4.76301	-5.75422	-4.92956	-4.31871	-4.02405	-5.10898	-5.44201	-3.5677	-4.70002	-5.82874	-3.24974	-3.93404	-3.75632	-3.96399	-4.34139	-4.38658	-4.94978	-3.49925	-4.80454	-4.76864	-5.55286	-5.67084	-4.11102	-6.67922
CDP - Av	-0.115043	0.0370197	0.758635	3.28106	3.34567	4.63591	3.17936	2.88103	2.84949	1.49331	3.10158	3.66764	3.07392	1.30989	3.3307	2.70708	3.04157	3.49426	3.91513	-0.792157	2.33123	5.08427	3.11983	4.52356	1.9608	3.83504	2.87841	4.53196	3.61444	4.55537	3.56113	2.13647	5.07628	4.89414	2.08472	2.95202	3.55865	4.44793	3.94612	3.89914	3.40503	3.30342	4.11358	3.19315	3.9605	0.27086	0.868248	4.65404	0.270531
Optimized - Av	-0.115043	0.0370197	0.758635	3.28106	3.34567	4.63591	3.17936	2.88103	2.84949	1.49331	3.10158	3.66764	3.07392	1.30989	3.3307	2.70708	3.04157	3.49426	3.91513	-0.792157	2.33123	5.08427	3.11983	8.78446	1.9608	3.83504	2.87841	4.53196	3.61444	4.55537	3.56113	2.13647	5.07628	4.89414	2.08472	2.95202	3.55865	4.44793	3.94612	3.89914	3.40503	3.30342	4.11358	3.19315	3.9605	0.27086	0.868248	4.65404	0.270531
Max- CDP	0.314423	0.503739	0.60757	0.920771	0.996334	3.4e-08	0.856777	0.977473	3.4e-08	5.87513	0.197639	1.54291	0.301063	3.68683	0.659111	0.228515	0.598216	3.35441	1.31786	4.34915	5.96289	3.4e-08	1.78835	4.2609	4.76617	1.11896	3.1018	3.4e-08	0.310595	0.496781	0.0126781	2.88508	3.4e-08	3.4e-08	1.23712	0.276089	1.6292	2.22045e-16	2.22045e-16	2.22045e-16	2.22045e-16	1.5679	1.13598	0.592753	2.22045e-16	2.88781	6.41369	2.22045e-16	6.09247
Positions allowed to mutate during design (X)																	X			X	X																		X				X	X		X	X	X	X
[truncated: 67 more columns]

## Sheet: X-CDP07
Enrichment ratios (e) below were calculated from deep sequencing data, according to the following equation:
e = log2([(mutant counts in sorted population)/(mutant counts in naïve library)]/[(WT counts in sorted population)/(WT counts in naïve library)])
Raw data (fastq files) and annotated analyzed data can be found at:
http://www.ncbi.nlm.nih.gov/geo/query/acc.cgi?acc=GSE80194
ND = no data
WT e highlighted in yellow
Construct name:	X-CDP07
Residue number	1	2	3	4	5	6	7	8	9	10	11	12	13	14	15	16	17	18	19	20	21	22	23	24	25	26	27	28	29	30	31	32	33	34	35	36	37	38	39	40	41	42	43	44	45	46	47	48	49
CDP sequence	A	D	P	K	K	V	L	D	K	A	K	D	R	A	E	N	V	V	R	K	L	K	K	E	L	E	E	L	Y	K	E	A	R	K	L	D	L	T	Q	E	M	R	D	R	I	R	L	A	A
Optimized design sequence	A	D	P	K	K	V	L	D	K	A	K	D	R	A	E	N	V	V	R	K	L	K	K	E	L	E	E	L	Y	K	E	A	R	K	L	D	L	T	Q	E	M	R	D	R	I	R	R	T	A
A	0.107164	0.385514	2.32793	-0.4445	-7.53916	-1.28571	-3.53279	-1.10296	-8.90087	0.107164	-8.78136	-2.56996	-3.87218	0.107164	-2.42862	-3.91308	3.10454	-1.14834	-4.845	-5.04439	-2.845	-9.18488	-3.53785	1.21325	-7.74147	1.37009	-2.79654	-2.0252	-3.08033	-4.63555	3.80033	0.107164	-1.30905	-7.96304	-2.12594	1.54317	0.919319	-1.96723	-3.51784	-1.4615	-5.37677	-1.40043	-0.581185	-3.12112	-3.0084	-8.40718	-8.39249	-0.242563	-0.455398
C	ND	ND	ND	-5.97728	0.844445	-2.72044	1.031	-8.45121	-8.35755	-4.43602	-0.717717	-6.06739	-2.24323	-1.68899	-1.51197	-0.831273	-8.37938	-6.77168	-1.81226	-3.51002	-8.03342	-3.61352	-6.52356	0.562946	-8.16993	-2.49537	-7.78137	-7.31288	-1.30237	2.73497	1.32579	-2.44719	-2.1953	-8.30625	-7.82676	-0.949516	-7.87852	-1.25315	-7.72724	-6.49856	-8.0764	-1.71536	-7.01283	-2.15001	-7.52219	-2.17093	-6.10725	-7.17356	-7.71423
D	ND	0.107164	ND	-5.2854	-6.76818	-1.29105	-2.98677	0.107164	-4.03927	-7.33985	-5.845	0.107164	-7.64386	1.8261	-1.59274	-1.84733	-1.85794	-1.69104	-1.33352	-3.32193	-7.50779	-6.90233	-2.03041	-1.01509	-6.84549	-0.914084	-1.36673	-7.17991	-1.48597	-7.55459	0.544682	-8.17991	-6.90807	-7.88166	-7.47529	-0.242563	-7.48578	-6.29291	-6.17379	-2.64109	-7.2933	-7.00347	-0.242563	-5.86976	-6.6163	-7.72577	-7.06052	-4.89526	-5.55295
E	0.391637	0.371438	ND	0.325172	-1.35098	-7.6393	-4.69804	-1.46562	-3.05369	-0.610457	-1.25962	-0.920705	-7.39488	-2.2063	0.107164	-2.75685	-7.07295	-2.52567	-8.03342	-0.465623	-7.73471	-1.28966	-1.20928	0.107164	-7.52356	0.107164	0.107164	1.35994	-7.31288	-1.15797	0.107164	-1.98919	-6.9221	-2.82097	-4.86614	-0.511475	-8.2093	-7.78604	-2.55309	-0.242563	-8.15887	1.34009	-1.27132	-7.88313	-6.23578	-7.54334	-8.36332	-1.19	-3.29492
F	ND	ND	ND	-3.58496	-6.20945	-2.22746	-4.83195	0.0999741	-7.59991	-6.09498	-6.45147	-6.30378	-2.78394	2.77723	-7.39232	-2.39974	-2.4291	-1.81487	-7.14975	-3	-0.726151	-2.96547	-6.2854	4.68087	-1.72301	-5.78136	-1.66021	0.992059	-0.873708	-7.76155	2.53266	-3.31627	-4.55621	3.53786	-6.78448	-1.14363	-6.88134	-2.34515	-7.44392	0.921313	0.406438	-8.23961	-0.640027	-2.34028	2.93147	-7.19411	-7.41945	-1.8811	-7.10845
G	0.0563296	0.807395	ND	-2.75103	-1.45534	0.737077	-0.86353	-1.0408	-7.34979	-4.21076	-0.389655	-2.14775	-3.72207	-0.0150741	-2.41104	-1.66347	3.0474	-1.88888	-5.57842	-6.06609	-5.34591	-1.55802	0.180234	1.99199	-9.49973	-0.807794	0.231074	0.38388	-9.09276	-7.16433	1.16608	0.0321072	-1.84341	-10.1867	-6.23336	-2.56838	-4.23982	-2.50242	-1.3132	-0.53355	-5.96374	-5.3543	-0.639098	-3.43051	-5.44037	-4.23867	-6.63366	-3.26861	-5.12054
H	ND	0.849879	ND	-4.45944	-5.83289	-2.29851	-6.47573	0.108722	-7.23841	0.695097	-2.66202	-1.18385	-1.02896	1.07696	-2.8665	-0.0570119	-7.16993	-6.37504	-0.272978	-2.37251	2.36578	-6.13805	0.978561	1.83394	-1.69748	-6.30378	-5.88348	-6.35755	-0.342189	-7.64386	1.58187	-7.63663	-1.81735	-6.74033	-4.48477	-0.545425	-7.12011	-1.30544	-0.919124	1.53765	-6.95712	-1.35879	-1.11536	-1.04048	-5.72063	-1.46083	-3.75125	-6.04085	-6.39211
I	ND	ND	ND	-0.635548	-6.20945	0.634373	-0.468197	-3.57415	-2.21321	-2.26782	-2.04197	-5.6653	-7.7211	-1.34182	-7.16993	-1.47172	-1.58761	-1.52265	-5.4429	-1.16606	-2.9316	-7.02237	-4.60517	2.39986	-1.385	-2.85794	1.00512	1.32025	-2.15492	-2.23438	2.7831	-8	-7.19017	-5.10428	-6.28075	2.30332	-6.43872	-2.32833	0.698974	0.850246	-0.0213541	-3.86954	-6.66466	-4.77053	-0.242563	-7.21279	-5.73924	0.235076	-6.98297
K	ND	ND	ND	0.107164	0.107164	-7.35755	-7.62205	-1.19564	0.107164	-7.13955	0.107164	-1.84644	-4.01802	-6.76818	-1.20383	-0.938111	-7.25739	-0.985491	-5.845	0.107164	-6.55459	0.107164	0.107164	-0.0559588	-6.80736	-0.537284	-0.305583	4.52054	-4.75103	0.107164	1.12544	-1.50376	-2.35444	-0.202854	-7.01416	1.38557	-5.76847	0.09192	-0.736191	0.748497	-1.37696	-6.82218	-5.23418	-6.83899	6.06292	-7.18323	-4.43886	1.27924	-7.17834
L	ND	ND	0.0295847	-4.15911	-7.49185	-1.18753	0.107164	-1.74832	-6.81546	-1.44393	-6.24698	0.541692	-2.77612	0.423496	-2.31061	-9.28309	-3.20033	-2.15433	-2.13031	-5.78136	0.107164	-5.20323	-6.58197	2.78788	0.107164	-7.27612	0.665944	0.107164	-7.41785	-3.04089	2.3201	-2.83433	-3.12346	-6.84335	-0.242563	0.342346	-0.242563	-3.33668	-2.97574	-2.22797	-1.9575	-3.41688	-7.09609	-2.5484	-0.950895	-1.71443	-0.242563	-0.669895	-8.50437
M	ND	ND	ND	-5.85798	-1.48916	-0.672074	-2.21132	1.84019	-5.15212	-2.05059	-2.37251	0.809042	-7.83289	1.20639	-3.46562	-5.41691	-5.30483	-5.43429	-6.87036	-3	-7.34873	-2.29851	-0.597329	2.93574	-7.23841	-1.77851	2.78196	1.2347	-5.90689	-7.37504	2.66475	-1.42339	-7.22586	-4.43619	-2.39183	-0.969863	-0.82825	-6.44888	-6.03267	0.462316	-0.242563	-3.33018	-7.31143	-4.43577	-0.164556	-7.35439	-0.920758	-7.11113	-5.12215
N	ND	-0.0193347	ND	-0.413156	-0.836879	-1.34182	-7	-0.527907	-2.02549	-6.70044	-1.78098	-1.22603	-7.45943	0.682899	-6.96578	0.107164	-6.93074	-1.07295	-6.40939	-0.255405	-6.58496	-1.35315	-0.228373	1.01298	-5.26004	-0.528633	-1.31362	-2.61537	-0.398509	-0.488206	2.50847	-7.87651	-6.46052	-0.842629	-2.36172	-1.45319	-0.609051	-0.459163	-6.33026	-0.506993	-6.68525	-7.05713	-0.767052	-6.67835	-0.601405	-7.41305	-1.27624	-6.77764	-6.73122
P	0.142059	ND	0.107164	-4	-6.52356	-7.69349	-1.25953	-2.83195	-2.76575	-3.04237	-7.09803	-0.179869	-4.67117	-2.82066	-2.87713	-7.36632	-8.0168	3.74249	0.804598	-4.08746	-1.4738	-1.49804	-6.53916	-0.375312	-0.730185	2.19007	-7.45121	-1.41013	-6.78136	-8.09275	-0.631286	-4.71829	-4.08549	-7.35249	-1.91147	-0.956136	-1.92104	-2.54166	-1.89796	0.415634	-2.87874	-4.0322	1.14063	-3.87744	-7.5356	-3.08169	-0.394264	-3.89184	-5.58478
Q	ND	ND	0.933647	-0.709549	-0.191067	-7.02237	-2.61417	-3.25026	-2.22051	2.57391	-0.0225712	-4.33599	-3.58456	-7.23841	-1.4931	-6.88264	-6.91886	-7.15987	-6.90689	-0.442903	-7.22882	-1.2456	-0.270593	-0.828193	-6.26678	-1.7395	-2.37906	-0.300812	-6.22882	-2.76208	-0.297307	-2.39454	-6.83999	-3.67274	-3.26863	1.72832	-2.88965	-6.65303	-0.242563	-2.71761	-6.75335	-5.03718	-3.25538	0.29843	-5.99124	-7.30677	-1.92537	0.59013	-6.93257
R	-1.41416e-06	ND	1.94941	-0.799047	-0.530579	-1.4931	-1.19743	-1.37251	-1.72705	-2.86801	0.126064	-0.433443	0.107164	-0.827251	1.14043	-1.96843	-2.51949	-0.166063	0.107164	-1.20153	1.053	-2.39298	-2.39298	2.81964	-2.8395	-4.87656	1.06326	1.61383	-2.0068	-0.812426	1.37826	-3.92577	-0.202854	-3.90434	-0.147846	1.36055	-4.70385	-1.54506	-0.297412	0.749051	-4.01457	-0.242563	0.31384	-0.242563	1.22771	-0.242563	5.045	0.463439	-9.54335
S	0.130527	3.27134	-0.179869	-6.02787	-5.47685	-0.422711	-1.87371	-0.73677	-1.04295	-2.05532	-2.84978	0.78152	-0.0791548	-1.93051	-2.66824	-1.6286	-1.75809	-1.00573	-2.14547	-5.58496	-4.64454	-2.39228	-4.04305	0.712464	-2.73241	-1.69932	-0.998563	0.376586	-5.45147	-7.99603	4.48239	1.20018	-1.40818	-8.47255	-2.17537	-2.06515	-7.11684	-2.79044	1.34312	-2.95562	-3.59918	-2.05511	-1.10368	-1.4934	-3.18697	-3.90189	-6.80534	-0.412359	-3.66433
T	-0.00296759	ND	0.372357	-0.346041	-1.19868	-1.91149	-4.64055	0.78856	-3.13805	-2.10644	-2.65939	-2.96486	-4.9931	-1.25886	-6.55043	-1.19524	-0.487991	-1.20516	-7.08746	-0.398509	-7.87651	-4.70594	-2.39636	-1.09623	-7.02237	-2.93511	-7.77479	2.23409	-6.6865	-3.24041	5.36516	-0.891888	-3.10849	-3.82337	-7.66357	-0.551276	-7.80318	-0.242563	-7.20061	0.17556	-2.24422	-7.735	-2.32988	-5.47146	-1.28759	-6.73058	-0.232753	2.2489	-2.07973
V	-0.318519	0.389987	ND	-3.67508	-7.91886	0.107164	-5.08146	-0.740901	-2.29404	-0.684696	-4.20793	-2.25878	-9.32867	-0.894341	-1.47268	-3.73757	0.107164	0.107164	-8.3475	-4.24793	-1.41163	-5.74639	2.40951	0.77788	-1.09639	1.25967	-0.72549	-0.238213	-3.49353	-3.55558	4.5689	-0.966193	-6.4552	-3.20668	-5.67156	0.626817	-2.04499	-3.32463	-2.18065	-0.881215	-3.45386	-2.26274	-1.82277	-4.32566	-0.231799	-7.11401	-1.11966	1.33365	-3.7093
W	ND	ND	ND	-5.70044	-1.45268	-0.998118	-2.42601	-4.13419	-8.41785	0.915731	-5.2165	-0.686499	-8.64025	-1.12334	-1.92623	-6.28899	-7.3815	-4.16259	-1.69444	1.47548	-7.23546	-2.93811	-6.94252	4.6432	-8.44708	-7.96579	-0.983837	-2.59491	-2.82318	-7.45943	1.47488	-7.06739	-6.7428	-5.33828	1.55555	-0.821978	-8.67684	-8.05305	-1.25531	0.476982	-8.0204	-2.52505	-0.0146922	-8.61847	2.09021	-7.94166	-6.8821	-2.62266	-4.94843
Y	ND	0.555751	ND	-4	-6.79442	-0.368444	-7.20945	0.586844	-7.14975	-0.194976	-5.24041	1.70873	-7.40939	4.94126	-5.26975	-2.1219	-7.67242	-6.61471	-0.386869	-3.58496	2.63344	-6.16953	-5.97728	4.75059	-1.64815	0.415591	-2.77461	-0.168767	0.107164	-4.14651	3.09484	-1.6499	-7.32155	-5.20166	-0.183233	-1.12292	-7.1425	-1.46927	-6.71329	1.186	-4.7748	-1.76564	-1.80778	-0.60595	2.49468	-7.59176	-7.60894	-0.985126	-6.26573
STOP	ND	ND	ND	ND	-3.60078	-2.02549	ND	-1.97869	0.181361	-6.62044	-4.00478	-1.65631	-6.81877	ND	-6.28899	ND	-2.37251	ND	-2.57783	-1.72866	-0.985491	ND	-1.68034	-1.9657	1.67431	-0.511917	-2.13805	-0.548085	-6.76483	ND	-4.95145	-6.62044	ND	-5.61302	-6.646	-5.84408	-3.21969	-1.29284	-1.90376	-2.43281	ND	ND	-6.27386	0.825201	-4.943	ND	ND	-4.9306	ND
CDP e	0.107164	0.107164	0.107164	0.107164	0.107164	0.107164	0.107164	0.107164	0.107164	0.107164	0.107164	0.107164	0.107164	0.107164	0.107164	0.107164	0.107164	0.107164	0.107164	0.107164	0.107164	0.107164	0.107164	0.107164	0.107164	0.107164	0.107164	0.107164	0.107164	0.107164	0.107164	0.107164	-0.202854	-0.202854	-0.242563	-0.242563	-0.242563	-0.242563	-0.242563	-0.242563	-0.242563	-0.242563	-0.242563	-0.242563	-0.242563	-0.242563	-0.242563	-0.242563	-0.455398
Optimized e	0.107164	0.107164	0.107164	0.107164	0.107164	0.107164	0.107164	0.107164	0.107164	0.107164	0.107164	0.107164	0.107164	0.107164	0.107164	0.107164	0.107164	0.107164	0.107164	0.107164	0.107164	0.107164	0.107164	0.107164	0.107164	0.107164	0.107164	0.107164	0.107164	0.107164	0.107164	0.107164	-0.202854	-0.202854	-0.242563	-0.242563	-0.242563	-0.242563	-0.242563	-0.242563	-0.242563	-0.242563	-0.242563	-0.242563	-0.242563	-0.242563	5.045	5.045	-0.455398
Average e	0.0632786	0.746571	0.791461	-2.9197	-3.71592	-2.32263	-3.29273	-1.43209	-4.56973	-2.44771	-3.28053	-1.74213	-4.85479	-0.753611	-3.01645	-3.08306	-3.98431	-2.49249	-4.06901	-2.59745	-3.96621	-3.72554	-2.82429	1.49298	-4.72836	-2.15773	-1.91703	-0.803035	-3.8742	-4.21397	2.09481	-3.27409	-4.40352	-4.93813	-3.87769	-0.23057	-4.85407	-3.12766	-3.17344	-0.657171	-4.37213	-3.69416	-2.37277	-3.77219	-1.99646	-5.67648	-4.01345	-2.05061	-5.64429
Maximum e	0.391637	3.27134	2.32793	0.325172	0.844445	0.737077	1.031	1.84019	0.107164	2.57391	0.126064	1.70873	0.107164	4.94126	1.14043	0.107164	3.10454	3.74249	0.804598	1.47548	2.63344	0.107164	2.40951	4.75059	0.107164	2.19007	2.78196	4.52054	0.107164	2.73497	5.36516	1.20018	-0.202854	3.53786	1.55555	2.30332	0.919319	0.09192	1.34312	1.53765	0.406438	1.34009	1.14063	0.29843	6.06292	-0.242563	5.045	2.2489	-0.455398
Minimum e	-0.318519	-0.0193347	-0.179869	-6.02787	-7.91886	-7.69349	-7.62205	-8.45121	-8.90087	-7.33985	-8.78136	-6.30378	-9.32867	-7.23841	-7.39232	-9.28309	-8.37938	-7.15987	-8.3475	-6.06609	-8.03342	-9.18488	-6.94252	-1.09623	-9.49973	-7.96579	-7.78137	-7.31288	-9.09276	-8.09275	-0.631286	-8.17991	-7.32155	-10.1867	-7.82676	-2.56838	-8.67684	-8.05305	-7.72724	-6.49856	-8.15887	-8.23961	-7.31143	-8.61847	-7.5356	-8.40718	-8.39249	-7.17356	-9.54335
Max - Av	0.328358	2.52477	1.53647	3.24488	4.56037	3.0597	4.32373	3.27227	4.67689	5.02162	3.4066	3.45085	4.96195	5.69487	4.15688	3.19022	7.08885	6.23497	4.87361	4.07293	6.59965	3.83271	5.2338	3.25761	4.83552	4.3478	4.69899	5.32358	3.98136	6.94894	3.27034	4.47427	4.20067	8.47599	5.43324	2.53389	5.77339	3.21958	4.51656	2.19482	4.77856	5.03426	3.5134	4.07062	8.05939	5.43392	9.05845	4.2995	5.1889
Min - Av	-0.381797	-0.765905	-0.971329	-3.10816	-4.20294	-5.37086	-4.32933	-7.01912	-4.33114	-4.89213	-5.50082	-4.56165	-4.47388	-6.48479	-4.37587	-6.20003	-4.39507	-4.66738	-4.27849	-3.46864	-4.06721	-5.45933	-4.11822	-2.58921	-4.77138	-5.80806	-5.86434	-6.50985	-5.21856	-3.87878	-2.7261	-4.90583	-2.91803	-5.24859	-3.94907	-2.33781	-3.82276	-4.92539	-4.5538	-5.84139	-3.78675	-4.54545	-4.93865	-4.84628	-5.53913	-2.7307	-4.37904	-5.12295	-3.89905
CDP - Av	0.0438855	-0.639406	-0.684297	3.02687	3.82309	2.42979	3.39989	1.53925	4.67689	2.55488	3.3877	1.84929	4.96195	0.860775	3.12361	3.19022	4.09148	2.59965	4.17617	2.70461	4.07338	3.83271	2.93145	-1.38582	4.83552	2.26489	2.02419	0.910199	3.98136	4.32114	-1.98765	3.38125	4.20067	4.73527	3.63513	-0.0119929	4.61151	2.8851	2.93088	0.414608	4.12956	3.4516	2.13021	3.52963	1.7539	5.43392	3.77089	1.80805	5.1889
Optimized - Av	0.0438855	-0.639406	-0.684297	3.02687	3.82309	2.42979	3.39989	1.53925	4.67689	2.55488	3.3877	1.84929	4.96195	0.860775	3.12361	3.19022	4.09148	2.59965	4.17617	2.70461	4.07338	3.83271	2.93145	-1.38582	4.83552	2.26489	2.02419	0.910199	3.98136	4.32114	-1.98765	3.38125	4.20067	4.73527	3.63513	-0.0119929	4.61151	2.8851	2.93088	0.414608	4.12956	3.4516	2.13021	3.52963	1.7539	5.43392	9.05845	7.09561	5.1889
Max - CDP	0.284473	3.16418	2.22076	0.218008	0.737281	0.629913	0.923838	1.73302	0	2.46674	0.0189004	1.60156	0	4.83409	1.03327	0	2.99737	3.63532	0.697434	1.36832	2.52628	0	2.30235	4.64342	0	2.0829	2.67479	4.41338	0	2.62781	5.25799	1.09302	0	3.74071	1.79811	2.54588	1.16188	0.334483	1.58568	1.78021	0.649001	1.58266	1.38319	0.540993	6.30548	4.71845e-16	5.28756	2.49146	0
Positions allowed to mutate during design (X)													X			X	X			X	X		X	X	X		X	X											X	X	X	X	X	X	X	X	X	X	X
[truncated: 67 more columns]

## Sheet: W-CDP03
Enrichment ratios (e) below were calculated from deep sequencing data, according to the following equation:
e = log2([(mutant counts in sorted population)/(mutant counts in naïve library)]/[(WT counts in sorted population)/(WT counts in naïve library)])
Raw data (fastq files) and annotated analyzed data can be found at:
http://www.ncbi.nlm.nih.gov/geo/query/acc.cgi?acc=GSE80194
ND = no data
WT e highlighted in yellow
Construct name:	W-CDP03
Residue number	1	2	3	4	5	6	7	8	9	10	11	12	13	14	15	16	17	18	19	20	21	22	23	24	25	26	27	28	29	30	31	32	33	34	35	36	37	38	39	40	41	42	43	44	45	46	47	48	49
CDP sequence	D	P	K	K	V	F	D	E	A	K	D	R	A	E	N	N	V	R	R	L	K	Q	K	L	E	E	L	Y	K	E	A	R	K	K	D	L	T	Q	E	E	R	E	K	L	K	E	K	Y	K
Optimized design sequence	D	P	K	K	V	F	D	E	L	K	D	R	A	E	N	N	V	R	R	L	K	Q	K	L	E	E	L	Y	K	E	A	R	K	K	D	L	T	Q	E	E	R	E	K	L	K	T	K	Y	K
A	-3.84005	-0.654623	1.28173	-1.99487	-4.14904	-5.14384	1.62943	-1.89317	0	-0.104162	-1.08106	0.0501703	0	-0.631947	0.359715	-0.483911	-1.82495	-0.235579	-5.52656	1.18145	-1.12862	-0.157359	-2.52989	-0.348906	-0.179905	-0.871533	-0.0935665	-1.04204	-0.322749	-1.05583	0	0.194649	0.252115	-0.750418	-0.532464	-0.842915	-2.21509	-0.203129	-0.0320736	0.208741	-1.24804	-0.769666	-1.46941	-1.83198	-1.92987	-0.893442	-1.12118	1.08009	-4.74695
C	0.932137	-4.79425	-0.147483	-2.64741	-5.26212	-4.02988	0.932137	-1.84755	-5.12546	-5.18878	0.932137	-1.32834	-0.840055	-2.34609	-3.77079	-6.37921	-4.97961	-0.349068	-3.12546	-1.5803	-5.60824	-1.49956	-6.47305	-3.83252	-0.255092	-1.88675	-1.73263	-2.74695	-1.64344	-2.17545	-2.68896	-1.23765	-2.12351	-1.73856	0.932137	-4.94858	-3.29949	-3.01996	-3.54357	-3.33191	-1.94497	-2.92043	-2.16198	-2.80661	-3.22427	-3.34468	-1.35878	0.508893	-2.48391
D	0	-0.582559	-3.08798	1.31195	-5.3399	-3.56798	0	0.932137	-4.00998	-3.96934	0	-0.746945	-3.33191	0.932137	-4.58152	-2.90614	-1.2386	-1.28852	-3.54049	-4.39464	-4.14384	-3.35575	-5.6918	0.91787	0.932137	0.932137	-3.86242	-5.51953	-2.55055	0.932137	-5.01996	-2.00998	-2.56408	-2.29401	0	-0.973911	-2.42502	-4.64741	0.932137	0.932137	-3.52188	0.932137	-4.62141	-3.58152	-2.47305	0.932137	-0.753343	-2.31037	-4.37921
E	0.514748	0.98688	-1.74695	-3.27746	-5.99487	0.932137	-1.04169	0	-0.50302	-1.06786	0.222681	-0.686938	-2.14384	0	-0.461543	-2.13516	-1.46115	-0.833823	-4.31579	-4.7227	-2.85128	-2.94858	-4.58825	-3.27746	0	0	-1.66731	-3.54511	-2.57424	0	-1.90954	-0.321182	-1.31075	-0.597333	-0.0709088	-0.199951	-1.04517	-0.463152	0	0	-2.25429	0	0.412044	-1.36031	-4.51853	0	-1.68292	1.40436	-1.00998
F	-2.18245	-3.69804	0.765086	0.512247	-1.17044	0	-0.0530486	-4.24945	-2.59494	-1.11307	-2.54049	-3.36362	-0.64741	0.179574	-3.04951	1.25124	0.307502	-1.59494	-4.37921	0.631017	-3.07527	0.473103	-3.86242	0.884311	-1.54049	0.333975	2.02331	-0.633604	-0.222912	-1.76062	-0.599047	-1.64741	-3.02988	-3.86242	-1.19761	0.617418	-2.88445	-2.74695	-2.44886	-1.07527	-1.51652	-2.42502	-1.11804	0.509691	-1.24756	-1.99386	0.553766	-0.948579	-3.42502
G	-1.04017	-0.467143	-0.32637	0.0287897	-5.72406	-2.54049	-1.17853	-3.18537	-4.2284	-2.42702	0.466433	-0.138045	-3.12083	-0.313358	-0.796751	-1.33141	-0.0340189	-2.1829	-5.05599	-0.0174911	-1.12134	0.749059	-3.0645	-1.54931	0.337105	0.0562665	-0.49699	-1.08102	-0.714168	-0.596098	-0.345474	-0.784445	-1.43039	-0.658968	0.038564	-1.54813	-0.862847	-0.451033	-0.270881	0.054534	-1.23399	-0.119298	-0.650884	-1.75511	-1.08551	0.797661	-1.60603	0.54635	-1.6925
H	-2.9133	2.57498	0.975521	-3.04951	-2.96934	-3.00998	-2.33191	1.15995	1.42298	-0.357903	0.829797	-1.65531	2.74491	-0.683329	-0.770792	-4.73487	0.0224416	-0.73314	-1.64741	-3.23237	-3.23237	0.22504	-1.82874	1.3855	-0.425017	1.69046	-1.52188	-0.725412	-0.857128	1.37754	-4.5543	0.363479	-0.483911	0.379258	-0.261519	-3.00998	-2.36362	-0.00997985	-1.20929	-4.45476	-0.508433	-1.34256	1.36853	0.0274949	-1.61264	-4.56798	-0.438314	-0.156013	-2.23237
I	-1.38754	-1.92752	0.932137	0.932137	0.857382	2.66691	-2.59494	-0.0416887	-3.23237	0.932137	-2.84005	-4.21509	ND	-0.240593	-3.48391	-1.92144	-0.0572856	-3.77079	0.619377	0.600518	0.932137	-0.454765	0.932137	-4.14384	-2.42502	1.22706	0.0781511	0.564999	0.932137	-3.96934	-3.51248	-0.48116	0.932137	0.932137	-3.86242	-1.23237	-1.84005	-2.88445	0.34437	0.42298	-2.00105	-1.16998	0.932137	-1.98301	0.932137	1.45273	0.932137	4.15995	0.932137
K	-0.454765	-2.29949	0	0	-1.40077	-3.86242	-1.42502	-2.04951	-3.12546	0	1.69046	-5.40991	0.700514	-1.33831	-1.42502	-2.88445	0.890759	1.38736	-1.92752	0.932137	0	-0.907799	0	0.932137	-2.36362	-1.63261	0.932137	0.744908	0	-3.01996	-1.97756	-1.4525	0	0	0.687457	0.932137	-1.16198	2.13298	0.200587	-1.06887	0.382338	-0.580296	0	0.932137	0	-0.762887	0	2.84961	0
L	-0.193692	2.18186	-3.44739	-1.46809	1.46108	0.0484368	-0.323138	-5.90075	4.18925	-2.67926	-1.50112	-0.811726	3.05611	0.507397	-3.12546	-0.770514	-1.45108	-0.309858	-3.28852	0	-2.63329	0.61997	-0.818681	0	0.749661	0.147973	0	-0.242957	-1.89214	-0.641829	-2.56588	-3.02087	-1.17321	-1.29072	-0.852655	0	-2.96934	-0.651697	-2.24945	-1.7841	-0.932601	-1.07709	-0.975665	0	-0.516516	-0.72758	-1.15754	-0.386543	-4.85128
M	0.652985	-3.51248	1.40787	-0.528111	0.747819	-1.58152	-1.74695	-3.62141	-2.54049	-0.626651	-0.308204	-1.3579	2.79738	0.683917	0.932137	0.932137	1.40095	-1.48391	-0.567975	0.958311	-4.78257	-0.313986	-3.52656	0.94204	2.74491	1.15995	0.619377	-1.7227	-0.302161	-0.226113	1.8571	-0.139615	-0.64741	-1.69472	-0.0193785	-2.19055	-1.74695	-4.42502	-0.635235	-3.11058	-2.57341	-3.86242	-2.78491	-3.28631	-0.601895	0.292049	-0.465496	1.00794	1.85182
N	1.26378	0.932137	-1.03645	1.06684	0.124321	-2.42502	-4.26632	-3.19761	-2.64741	0.184193	-1.16198	0.450994	2.81202	-1.49956	0	0	-3.04951	-0.862423	0.975521	-2.79425	1.33682	0.0958148	-1.51562	-2.84005	ND	-4.34785	-4.42502	-1.46455	-0.700652	1.69046	-4.36362	-0.259594	-2.02988	0.754689	1.21805	-2.36362	-1.20929	-2.59494	-0.64741	-3.84005	-4.58152	-1.23237	2.35788	-4.02988	-3.39464	0.0365627	-1.45896	-1.06245	-0.125457
P	-1.59494	0	-3.16198	-4.62141	-4.87897	-4.56798	-3.77079	-4.64741	-3.80584	-5.66023	-4.02988	-4.25509	-2.23237	-5.46211	-3.90614	-6.26632	-1.93692	-5.52656	-3.40991	2.10336	-5.36362	0.932137	-2.50183	-2.02063	-2.74695	-2.42502	-1.28228	-3.74213	-0.479173	-2.27223	-0.0963946	-0.836042	-0.204892	0.526556	0.170438	-3.57476	-1.92752	0.932137	0.108106	-5.54741	-1.92043	-2.35838	-2.73891	-2.10809	-4.94159	-1.10854	-3.5725	-2.11307	-0.209289
Q	-3.48391	0.125998	2.29745	-4.39464	-1.04951	-0.681357	-1.92752	-2.9898	-4.10684	-0.806888	0.51884	0.932137	-2.69804	-0.175658	1.53191	-1.25099	-0.671455	0.932137	0.932137	-4.48391	-3.81733	0	-2.53791	-1.76062	-3.00998	1.56737	-5.10684	-0.588993	0.339495	0.297449	-4.45476	0.932137	-4.23237	-1.23491	-3.53122	-1.05305	-1.00998	0	0.159945	-5.21509	0.932137	0.000746557	-1.11307	-1.19554	-2.82874	0.320741	-1.27992	-3.96934	-0.64741
R	-0.951726	-0.0864927	0.315596	0.317825	-4.46649	-2.70513	-1.49956	-3.4935	-6.8116	-0.00754902	0.851396	0	-4.74695	-1.29787	-0.907169	-2.24805	0.278307	0	0	-1.76985	-1.14195	-0.105305	-0.237775	-0.360477	-1.34616	-0.968662	-3.65184	-1.46192	0.541789	-1.08629	-1.11403	0	-0.634612	-0.351017	-0.282059	0.380275	-0.432512	-1.31731	0.110988	-0.921443	0	-0.974961	0.208587	-1.6768	-0.815218	-1.46001	0.0602899	1.25121	0.130883
S	-0.701671	-1.5484	-2.82712	0.235353	-3.39025	-3.76289	-4.06887	-1.05599	-1.50748	0.686014	-0.16976	1.09301	1.09581	-0.0457299	-1.88445	-0.947696	-2.2689	0.0665183	-1.99656	-1.95553	-0.532821	0.481873	-2.9133	2.48028	3.20301	0.759292	-2.72987	-0.448864	-0.176799	0.0370176	-0.865084	-2.86633	-2.17937	-0.46965	0.178092	-0.596386	0.932137	-0.511822	0.253631	-1.51617	-1.63383	-1.32498	-0.529814	-4.02245	-0.784616	0.35259	-0.0422437	0.668469	-3.32387
T	-2.05305	-0.666906	1.49115	0.918937	0.932137	0.23938	-3.19761	-4.24945	-1.94159	-0.656343	-0.172251	-1.71452	1.85328	-3.21509	-3.36362	-5.86242	0.932137	-3.75494	-3.94858	2.10409	0.35259	-1.08581	-5.959	-2.64741	-1.64741	-1.4935	-2.31579	-5.57476	0.283027	-1.32772	-3.9133	-0.921849	-0.504538	-0.72605	-0.290088	-2.07952	0	-2.27544	-0.558448	-1.57959	-1.68404	-0.734873	-0.444126	-0.525419	-0.64741	1.25109	-0.0252697	0.0521419	-1.54049
V	-0.531933	-2.91687	0.289074	-0.243179	0	1.07618	-1.35102	-0.60559	-2.38438	-1.29949	-1.56916	-0.657191	0.193892	-0.175855	-1.05354	0.407163	0	-0.535661	-3.07162	1.11812	-2.16559	0.535625	-0.44981	0.231498	0.767628	-0.193541	-1.61546	-0.883223	-0.270759	-0.883082	0.043738	-2.60305	-0.548914	-1.19761	-0.962045	-1.0187	-5.01996	-0.203602	-0.57097	-1.14491	-1.54251	-0.720032	-0.692759	-0.581386	-0.749908	0.913223	-0.836752	1.08371	-5.80006
W	-0.332653	-0.936916	-1.76289	-0.624326	-0.976321	-0.257907	0.124321	-2.68136	-3.48391	-2.17792	0.747164	-0.448864	-3.59494	-0.519612	0.533162	3.85496	-1.47318	0.0030763	-5.65384	-0.107535	-0.0546489	1.37521	-2.48391	-2.84697	1.59753	-0.000377851	-1.94858	0.932137	-0.870255	-0.59412	-1.00721	-1.19817	-0.600867	-0.638886	-0.649921	-1.01498	-4.283	-0.714524	0.156943	0.197665	-1.56838	-3.30416	0.142397	0.0404692	-0.766512	-0.933567	-2.93728	0.932137	-0.944392
Y	2.02969	-2.08798	-0.556262	-3.19761	-0.279678	-0.840055	0.120417	-3.45476	4.03827	-0.161983	-1.04951	-4.00998	ND	1.13825	2.0413	2.48187	-1.40077	-3.92752	-3.79425	-0.898949	-4.40991	0.910773	-2.51248	-3.88445	-2.00998	0.287953	-0.67959	0	0.46963	-0.00151827	1.40192	-1.44886	-0.827982	-2.23237	-0.246047	-1.42502	ND	-2.29949	-0.051559	1.21509	-0.887361	-1.42502	0.866214	0.115551	-3.50112	-2.12546	0.585251	0	-3.64741
STOP	-1.04169	-3.33191	1.7311	-3.56798	-1.32245	-2.85501	-2.59494	0.432964	0.979373	-4.34785	-3.39464	1.26464	-1.84005	0.557281	-3.33191	-5.29949	-4.79425	-4.71042	-4.06887	-4.06887	0.95235	-2.09744	1.56685	1.17182	-1.07272	0.62943	1.04997	-0.347849	-3.52935	-0.0788417	0.39441	-5.45476	0.369173	0.493946	0.83237	0.516089	-1.54049	1.02636	0.5006	-3.36988	-0.997099	-2.73083	-1.23237	-3.73083	-2.22203	-2.54049	-4.8899	-1.22472	2.27676
CDP e	0	0	0	0	0	0	0	0	0	0	0	0	0	0	0	0	0	0	0	0	0	0	0	0	0	0	0	0	0	0	0	0	0	0	0	0	0	0	0	0	0	0	0	0	0	0	0	0	0
Optimized e	0	0	0	0	0	0	0	0	0	0	0	0	0	0	0	0	0	0	0	0	0	0	0	0	0	0	0	0	0	0	0	0	0	0	0	0	0	0	0	0	0	0	0	0	0	0	0	0	0
Average e	-0.813426	-0.96889	-0.417262	-1.03613	-2.14645	-1.70067	-1.39853	-2.35361	-2.11993	-1.32511	-0.508229	-1.41366	-0.450134	-0.725192	-1.3591	-1.55976	-0.900766	-1.25003	-2.63613	-0.816426	-2.17206	-0.221516	-2.62817	-1.08695	-0.400929	-0.282871	-1.47385	-1.45909	-0.550553	-0.76378	-1.78424	-0.986922	-1.16712	-0.85725	-0.47668	-1.30713	-1.88232	-1.31774	-0.497552	-1.57795	-1.51194	-1.27043	-0.65066	-1.45595	-1.73537	-0.578461	-0.830255	0.229925	-1.90724
Maximum e	2.02969	2.57498	2.29745	1.31195	1.46108	2.66691	1.62943	1.15995	4.18925	0.932137	1.69046	1.09301	3.05611	1.13825	2.0413	3.85496	1.40095	1.38736	0.975521	2.10409	1.33682	1.37521	0.932137	2.48028	3.20301	1.69046	2.02331	0.932137	0.932137	1.69046	1.8571	0.932137	0.932137	0.932137	1.21805	0.932137	0.932137	2.13298	0.932137	1.21509	0.932137	0.932137	2.35788	0.932137	0.932137	1.45273	0.932137	4.15995	1.85182
Minimum e	-3.84005	-4.79425	-3.44739	-4.62141	-5.99487	-5.14384	-4.26632	-5.90075	-6.8116	-5.66023	-4.02988	-5.40991	-4.74695	-5.46211	-4.58152	-6.37921	-4.97961	-5.52656	-5.65384	-4.7227	-5.60824	-3.35575	-6.47305	-4.14384	-3.00998	-4.34785	-5.10684	-5.57476	-2.57424	-3.96934	-5.01996	-3.02087	-4.23237	-3.86242	-3.86242	-4.94858	-5.01996	-4.64741	-3.54357	-5.54741	-4.58152	-3.86242	-4.62141	-4.02988	-4.94159	-4.56798	-3.5725	-3.96934	-5.80006
Max - Av	2.84311	3.54387	2.71471	2.34808	3.60753	4.36758	3.02796	3.51356	6.30919	2.25724	2.19869	2.50667	3.50624	1.86344	3.4004	5.41472	2.30172	2.63738	3.61165	2.92052	3.50888	1.59673	3.56031	3.56723	3.60394	1.97333	3.49716	2.39122	1.48269	2.45424	3.64134	1.91906	2.09925	1.78939	1.69473	2.23927	2.81446	3.45072	1.42969	2.79304	2.44408	2.20257	3.00854	2.38809	2.66751	2.03119	1.76239	3.93002	3.75906
Min - Av	-3.02663	-3.82536	-3.03012	-3.58529	-3.84842	-3.44317	-2.86779	-3.54714	-4.69166	-4.33513	-3.52165	-3.99625	-4.29681	-4.73692	-3.22242	-4.81945	-4.07884	-4.27653	-3.0177	-3.90627	-3.43618	-3.13424	-3.84488	-3.05689	-2.60905	-4.06498	-3.63299	-4.11568	-2.02369	-3.20556	-3.23572	-2.03395	-3.06526	-3.00517	-3.38574	-3.64145	-3.13764	-3.32967	-3.04602	-3.96946	-3.06958	-2.59199	-3.97075	-2.57393	-3.20622	-3.98951	-2.74225	-4.19926	-3.89282
CDP - Av	0.813426	0.96889	0.417262	1.03613	2.14645	1.70067	1.39853	2.35361	2.11993	1.32511	0.508229	1.41366	0.450134	0.725192	1.3591	1.55976	0.900766	1.25003	2.63613	0.816426	2.17206	0.221516	2.62817	1.08695	0.400929	0.282871	1.47385	1.45909	0.550553	0.76378	1.78424	0.986922	1.16712	0.85725	0.47668	1.30713	1.88232	1.31774	0.497552	1.57795	1.51194	1.27043	0.65066	1.45595	1.73537	0.578461	0.830255	-0.229925	1.90724
Optimized - Av	0.813426	0.96889	0.417262	1.03613	2.14645	1.70067	1.39853	2.35361	2.11993	1.32511	0.508229	1.41366	0.450134	0.725192	1.3591	1.55976	0.900766	1.25003	2.63613	0.816426	2.17206	0.221516	2.62817	1.08695	0.400929	0.282871	1.47385	1.45909	0.550553	0.76378	1.78424	0.986922	1.16712	0.85725	0.47668	1.30713	1.88232	1.31774	0.497552	1.57795	1.51194	1.27043	0.65066	1.45595	1.73537	0.578461	0.830255	-0.229925	1.90724
Max - CDP	2.02969	2.57498	2.29745	1.31195	1.46108	2.66691	1.62943	1.15995	4.18925	0.932137	1.69046	1.09301	3.05611	1.13825	2.0413	3.85496	1.40095	1.38736	0.975521	2.10409	1.33682	1.37521	0.932137	2.48028	3.20301	1.69046	2.02331	0.932137	0.932137	1.69046	1.8571	0.932137	0.932137	0.932137	1.21805	0.932137	0.932137	2.13298	0.932137	1.21509	0.932137	0.932137	2.35788	0.932137	0.932137	1.45273	0.932137	4.15995	1.85182
Positions allowed to mutate during design (X)					X	X		X	X			X	X		X	X	X		X	X			X	X			X				X					X						X	X	X	X	X	X	X	X
[truncated: 66 more columns]

## Sheet: F-CDP01
Enrichment ratios (e) below were calculated from deep sequencing data, according to the following equation:
e = log2([(mutant counts in sorted population)/(mutant counts in naïve library)]/[(WT counts in sorted population)/(WT counts in naïve library)])
Raw data (fastq files) and annotated analyzed data can be found at:
http://www.ncbi.nlm.nih.gov/geo/query/acc.cgi?acc=GSE80194
ND = no data
WT e highlighted in yellow
Construct name:	F-CDP01
Residue number	1	2	3	4	5	6	7	8	9	10	11	12	13	14	15	16	17	18	19	20	21	22	23	24	25	26	27	28	29	30	31	32	33	34	35	36	37	38	39	40	41	42	43	44	45	46	47	48	49
CDP sequence	A	D	P	K	K	V	L	D	K	A	K	D	Q	A	E	N	R	V	R	E	L	K	Q	K	L	E	E	L	Y	K	E	A	R	K	L	D	L	T	Q	E	M	R	K	K	L	Q	Y	A	A
ECM sequence	A	D	P	K	K	V	L	D	K	A	K	D	Q	A	E	N	R	V	R	E	L	K	Q	K	L	E	E	L	Y	K	E	A	R	K	L	D	L	T	Q	E	M	R	K	K	L	E	V	A	A
Optimized design sequence	A	D	P	K	K	V	L	D	K	A	K	D	Q	A	E	N	R	V	R	E	L	K	Q	K	L	E	E	L	Y	K	E	A	R	K	L	D	L	T	Q	E	K	R	K	K	L	E	V	A	T
A	0.128426	0.0705102	0.240414	-1.45511	ND	0.107338	-0.521379	-0.796439	0.224494	0.128426	-1.21988	-0.0283563	-1.59343	0.128426	0.189618	-0.575981	-0.914442	0.922215	-0.822897	0.678644	1.95479	-1.31209	-0.602145	-4.24212	2.99289	-0.00405441	0.60166	-2.70206	0.583907	-2.47919	0.407271	0.0854068	-2.35737	-4.95166	-1.0645	0.688822	-0.241311	-0.0153991	-0.63948	-0.606887	-0.870409	-0.149526	-0.0767868	-2.97295	-1.08843	0.351439	0.646358	0.0423871	0.180248
C	-2.17535	-0.0429046	-0.597279	-0.173355	ND	ND	-2.09093	-0.156641	-0.325059	-1.56733	-1.53852	-2.75248	-0.0623569	-0.0842314	0.107568	-2.43403	-1.1364	-1.90836	-0.261295	-1.61494	-1.83788	-5.10402	-4.35369	-3.30247	1.02142	-0.676449	-1.85929	-3.02784	-0.00153411	-3.35407	-0.782504	-0.135246	-0.708424	-4.56442	-1.85328	-1.37728	-1.013	-2.14221	-2.48444	-5.2752	-3.02148	-0.291554	-4.63216	-4.09235	-5.83353	-1.57343	-2.68749	-4.78404	0.873573
D	0.296788	0.128426	-0.397747	-0.567055	ND	0.00490282	-3.12845	0.128426	1.08672	-1.1622	-4.51694	0.128426	0.0266068	-1.20486	0.165099	-0.207095	-2.89129	-0.751413	-1.06521	0.126973	-1.64315	-1.83539	-0.320704	-6.41973	-1.7158	0.246109	0.033674	-7.88425	-0.677809	-3.32419	0.316699	-0.641841	-3.79634	-2.51964	-5.1222	0.0854068	-0.407869	-0.494439	-3.0975	-0.132512	-1.87714	1.65886	-1.1801	-5.93119	-6.3097	0.489639	0.439967	-4.39776	1.21521
E	-1.09442	0.154691	-1.32385	-0.00561697	-0.0623569	ND	-0.609251	0.216254	0.429848	-0.14982	-0.0567104	0.401026	-0.105426	0.369039	0.128426	-0.45871	-4.77626	-3.81451	0.0711506	0.128426	-3.97085	-0.948053	-0.890844	-2.67384	-0.213215	0.128426	0.0854068	-4.02307	-2.4688	-1.31403	0.0854068	-2.80457	-5	-1.85806	-2.70779	-0.473522	0.257879	-0.271123	0.548469	0.0854068	-3.01854	1.76824	-0.200189	-1.27536	-5	0.96287	-0.316728	-0.734793	0.533548
F	0.246109	0.265218	0.52996	0.116574	ND	0.103299	-0.257937	-2.34246	1.15775	1.94855	0.265218	-1.39327	-1.16612	1.47905	1.27287	-2.79368	-1.04794	-2.2116	-1.61105	0.540976	0.5313	-1.33327	-2.32459	-5	2.95735	0.385674	1.58444	-2.64649	0.298357	-1.06832	0.399803	0.839469	-1.83374	-1.94103	-0.496206	0.327951	1.22219	-1.22733	-4.48059	0.146328	1.46573	3.11018	-2.033	-3.18545	-2.19714	-0.629823	0.905665	-5	4.62338
G	-0.482076	0.124765	-0.900841	-1.36271	ND	0.165054	-3.99695	-0.756283	0.244094	-0.612936	-1.39985	-0.637171	-1.14982	0.303845	-0.240399	-0.997034	-2.11054	-0.339271	-0.620949	0.476722	-0.957996	-0.00325877	-2.21332	-3.34203	2.6545	-0.0607765	0.931074	-5.28934	1.2891	-2.3425	2.78851	-0.935248	-4.27563	-2.26176	-2.23526	1.82243	-1.70334	0.28984	-0.601674	-0.804777	-0.588854	1.32996	-0.497945	-3.41731	-2.07033	2.22147	-6.18625	1.31278	-0.609474
H	0.681674	-0.534737	-1.07402	-1.00319	ND	ND	-0.654612	-0.000442155	0.503574	-0.97085	-1.01332	-0.81055	-0.618883	-1.70279	-1.31974	-0.0695006	-0.453826	-0.536002	0.14478	0.279024	4.68115	0.507857	-0.177196	-5.72876	0.227985	0.335607	-0.00848697	-1.65648	-0.55107	0.0476549	1.65457	-0.289873	-0.846134	-2.50196	-0.978487	0.26761	-0.0855072	0.117056	-0.254678	-1.27274	-0.385725	0.789705	0.189934	-4.8128	-1.33886	-0.431929	-0.3657	-5.09067	5.10796
I	-1.27535	0.637071	-0.496623	-0.405834	ND	0.203817	-1.67435	0.30586	0.201087	-0.831644	-0.978834	-0.703418	-0.936416	-0.16477	-1.02953	-0.0280745	0.724649	-1.48166	-1.75441	1.77256	1.07166	-0.935814	-2.0158	-4.43522	1.35619	-1.34776	1.04914	-0.0374238	1.93247	0.231848	-0.668293	0.1785	-2.0688	-1.96988	-0.190857	0.0808425	0.717145	-0.174142	-0.446468	-2.16542	-0.149336	-0.262079	-0.441178	-1.41992	0.80967	-1.95719	4.9532	-5	-0.610795
K	-0.346857	-1.20135	-0.0405907	0.128426	ND	ND	-1.0078	1.06431	0.128426	-5.47175	0.128426	-0.846428	-0.115331	-2.95717	-0.292331	0.203817	-1.81278	-5.51614	-1.57015	1.02961	0.65245	0.128426	0.0881135	0.128426	3.12564	-0.159944	0.65011	-5.1981	-1.78827	0.0854068	-0.0491677	-1.21761	-0.702746	0.0854068	-1.32527	-0.044466	1.64183	-0.430177	-0.0245673	-0.526524	-0.113096	-3.7306	0.0423871	0.0423871	-5	-0.732374	-2.83789	-6.65233	4.69673
L	0.390397	0.0340014	-0.95188	0.156482	ND	ND	0.128426	0.127212	0.346138	0.231156	-0.868274	-0.453118	-0.530564	0.332962	-0.0429046	-1.24011	-0.26756	-1.84413	-0.366327	1.18401	0.128426	-0.910632	-1.16337	-2.67255	0.128426	0.102507	0.629884	0.0854068	1.78713	-2.41908	-0.112704	0.89333	-1.34446	-0.695055	0.0854068	-0.133181	0.0854068	-1.1768	-0.739165	-1.17495	1.26887	1.0192	0.222966	-3.6398	0.0423871	-0.202374	0.522653	-7.18325	1.40825
M	-0.351925	-0.382111	-1.84014	-0.266334	ND	ND	0.185047	-0.289997	0.798217	0.188982	0.281733	-0.327607	-0.820512	2.07155	0.819019	-3.29957	-1.87917	0.0307525	-0.364263	0.711204	0.598373	-0.645777	-0.726169	-2.42666	0.93783	1.67406	0.99578	-1.36304	-0.397523	-2.14737	0.330988	0.412364	-0.673109	-2.02429	-1.52632	0.215605	0.242298	-0.617473	-0.759329	-1.11166	0.0854068	1.87376	-0.806494	-3.23729	-2.35928	-4.27911	0.249972	-5	-0.309997
N	-1.9394	-0.772063	-1.21511	-0.164175	0.0484063	ND	-4.57608	-0.0730626	-0.226782	0.242498	-0.43979	0.168095	-2.71617	0.429474	0.439715	0.128426	-4.08842	-2.49774	-1.35145	-0.130837	1.18722	-0.481026	0.199926	-1.70214	-1.38349	-1.10918	1.05084	-4.73276	-1.24721	-0.628903	2.24209	-2.71733	-0.954449	-0.843737	-1.71342	0.996668	-0.339586	-0.432403	-0.186532	0.13814	-2.93232	0.940484	0.63997	-0.371538	-2.59829	0.494887	-0.14394	-3.68035	0.897651
P	-0.725093	-0.394358	0.128426	-1.18283	-0.177301	ND	-0.311101	-0.621888	-0.318697	-0.999577	-2.23579	-2.00518	-0.782611	-2.09268	-4.29083	-1.3761	-0.205914	-3.82789	-1.17882	-0.918228	-0.978649	-2.20369	-1.70817	-5.97425	0.256634	-7.53784	-2.58799	-1.00353	-0.860159	-2.91511	3.89334	-0.972566	-2.72685	-1.16656	-0.247074	0.0631297	-0.169562	-0.118643	-0.234523	-2.51349	-0.160847	0.694319	-0.144142	-1.12937	-0.871529	0.459306	2.9372	-3.47176	0.791991
Q	-2.86971	0.0340444	0.725076	0.164257	-0.223568	ND	-0.315406	-1.75186	-0.0727787	-3.97764	-0.111897	-2.23728	0.128426	1.05487	-1.03434	0.563208	-2.08213	-2.34096	-2.53939	1.16469	-0.85904	-0.265823	0.128426	-2.46809	0.186271	-0.522629	-0.0374281	-3.73076	-1.48403	-0.242539	0.627659	-1.84714	-4.46018	-1.21856	-2.80088	0.57521	0.355055	0.440453	0.0854068	-1.33086	-1.76955	0.0726145	0.572307	-0.0153452	-5	0.0423871	-2.60926	-8.07464	1.54627
R	-0.0952958	-1.38854	-0.180012	-0.296385	0.367166	ND	-0.715077	-0.63001	0.181046	-3.55118	-1.18241	-0.401159	-1.30348	-3.60925	-1.47731	-1.05875	0.128426	-2.96202	0.128426	0.560674	1.61774	-0.493774	0.383765	-3.04231	3.24397	-0.165726	0.887037	-2.09691	-0.235585	-1.04445	0.521047	-0.101229	0.0854068	-0.718339	-0.0823104	0.840642	1.10737	0.396621	-1.13004	-3.2697	-1.26913	0.0423871	-0.351483	-0.940192	-4.33674	0.270133	-6.46044	-7.96521	-1.95216
S	-0.921503	-0.234876	-0.0788533	-1.21144	ND	ND	-1.90639	-0.459397	1.04812	-0.506062	-2.07399	-1.04889	-1.70649	-0.899413	-0.153672	-0.959597	-0.798701	-0.56208	-1.07902	0.869374	0.223959	-1.84093	-0.885931	-3.76511	2.46864	-0.593249	0.624808	0.0854068	0.261553	-1.31768	0.0836081	-0.40274	-0.198846	-1.54697	-1.68252	0.952914	0.0495683	0.372539	-0.574067	-1.35574	-0.645268	-0.324391	0.177058	-3.17131	-3.05448	1.56146	-1.04989	-2.51906	1.14792
T	0.118519	0.125566	-0.059622	-0.839864	0.0122137	ND	0.0121477	-1.77431	0.246373	0.135308	-0.572895	-1.92743	-1.7018	0.166513	-1.48862	0.224659	0.0417117	0.435143	-0.14982	0.748082	1.50494	-0.344392	-0.386118	-3.92993	-0.0546625	-1.13439	1.11521	-0.781358	-0.181382	-0.721442	-0.799931	-1.37869	-0.993166	-2.36016	-3.72281	0.567677	-0.229798	0.0854068	-0.0743206	-1.99417	-0.912358	-2.16664	0.745657	-0.155707	-1.23599	-1.17433	-0.471759	-2.28448	0.916671
V	-0.559857	-0.0176552	-0.451262	-0.596706	ND	ND	0.133507	-0.218533	-0.200218	-0.184962	-0.625848	-0.748683	-1.08771	0.460498	-0.20435	-0.991374	1.21696	0.128426	-1.02347	0.0337918	2.41423	-6.04982	-1.49473	-4.70002	-0.589871	-0.953217	0.0607122	0.212273	1.32386	-1.48052	0.449532	-0.608151	-1.29521	-2.87416	-1.09508	0.350821	-0.12855	-0.780627	-0.630773	-1.22082	-1.29972	-0.627099	0.275179	-4.54215	-0.0897559	-1.50411	5.22452	-1.45443	1.69317
W	-0.184253	0.74503	-0.926237	0.0784492	ND	ND	0.693779	-0.65148	0.554195	-0.396913	-0.114414	-0.14982	-0.781175	0.78878	-1.7072	-0.647482	-2.97	-1.57227	0.250421	-0.293729	3.04677	-0.168556	-0.16936	-6.35276	3.58256	0.412775	-0.7252	-5.41969	0.11058	-1.02159	-0.74597	1.54332	-3.57204	-2.07557	-1.54074	-0.629519	0.880139	-1.88552	-3.97506	-1.50184	-0.440109	2.12615	-4.37985	-5	-3.57386	-0.843727	-4.6644	-2.14983	2.87747
Y	-0.931474	-0.969248	0.706816	-0.218068	ND	ND	-0.371073	-0.614943	0.742797	1.05829	-0.268464	0.13628	0.346856	-0.0519725	-0.561718	-1.53886	-1.16337	-2.57303	-1.25075	-0.311032	4.76666	0.969644	-1.21728	-4.66439	5.04	1.30498	0.290752	-1.69039	0.0854068	-0.6939	0.0268219	0.589463	-0.519692	-2.26625	-2.59858	0.112909	-1.11062	0.0757433	-2.9765	0.726278	-0.0559174	2.60746	-2.60441	-5.31976	-5	-1.07583	0.0423871	-5	5.19176
STOP	-6.67338	-2.46261	-4.23292	-0.35096	-0.246035	ND	-5.81967	-2.59671	-3.14221	-1.77834	-3.97098	-5.09401	-2.80974	-3.47469	-2.50325	-7.30801	-3.75052	-3.57321	-4.79916	-2.59355	-6.49264	-2.60501	-2.00383	-3.31216	-1.63743	-2.66749	-1.76965	-7.12516	-1.45918	-3.47212	-2.31558	-3.24236	-5.12788	-3.20934	-8.70518	-4.35291	-4.72023	-3.71775	-2.41911	-2.87465	-5.50451	-4.3553	-2.7002	-4.42569	-8.77554	-2.60457	-1.58141	-4.80464	-2.96474
CDP e	0.128426	0.128426	0.128426	0.128426	0.128426	0.128426	0.128426	0.128426	0.128426	0.128426	0.128426	0.128426	0.128426	0.128426	0.128426	0.128426	0.128426	0.128426	0.128426	0.128426	0.128426	0.128426	0.128426	0.128426	0.128426	0.128426	0.128426	0.0854068	0.0854068	0.0854068	0.0854068	0.0854068	0.0854068	0.0854068	0.0854068	0.0854068	0.0854068	0.0854068	0.0854068	0.0854068	0.0854068	0.0423871	0.0423871	0.0423871	0.0423871	0.0423871	0.0423871	0.0423871	0.180248
ECM e	0.128426	0.128426	0.128426	0.128426	0.128426	0.128426	0.128426	0.128426	0.128426	0.128426	0.128426	0.128426	0.128426	0.128426	0.128426	0.128426	0.128426	0.128426	0.128426	0.128426	0.128426	0.128426	0.128426	0.128426	0.128426	0.128426	0.128426	0.0854068	0.0854068	0.0854068	0.0854068	0.0854068	0.0854068	0.0854068	0.0854068	0.0854068	0.0854068	0.0854068	0.0854068	0.0854068	0.0854068	0.0423871	0.0423871	0.0423871	0.0423871	0.96287	5.22452	0.0423871	0.180248
Optimized e	0.128426	0.128426	0.128426	0.128426	0.128426	0.128426	0.128426	0.128426	0.128426	0.128426	0.128426	0.128426	0.128426	0.128426	0.128426	0.128426	0.128426	0.128426	0.128426	0.128426	0.128426	0.128426	0.128426	0.128426	0.128426	0.128426	0.128426	0.0854068	0.0854068	0.0854068	0.0854068	0.0854068	0.0854068	0.0854068	0.0854068	0.0854068	0.0854068	0.0854068	0.0854068	0.0854068	-0.113096	0.0423871	0.0423871	0.0423871	0.0423871	0.96287	5.22452	0.0423871	0.916671
Average e	-0.604533	-0.180926	-0.410169	-0.455225	-0.00590661	0.116882	-1.04919	-0.464784	0.337467	-0.822483	-0.927123	-0.781851	-0.833821	-0.259106	-0.536031	-0.877791	-1.32435	-1.66113	-0.820725	0.351799	0.706605	-1.16352	-0.99246	-3.8357	1.31116	-0.483754	0.268607	-2.64502	-0.11105	-1.4075	0.533439	-0.475519	-1.91209	-2.01363	-1.64491	0.264534	0.0564868	-0.399431	-1.13379	-1.25806	-0.83449	0.524071	-0.724115	-2.72937	-2.80529	-0.377532	-0.593592	-3.95437	1.51097
Maximum e	0.681674	0.74503	0.725076	0.164257	0.367166	0.203817	0.693779	1.06431	1.15775	1.94855	0.281733	0.401026	0.346856	2.07155	1.27287	0.563208	1.21696	0.922215	0.250421	1.77256	4.76666	0.969644	0.383765	0.128426	5.04	1.67406	1.58444	0.212273	1.93247	0.231848	3.89334	1.54332	0.0854068	0.0854068	0.0854068	1.82243	1.64183	0.440453	0.548469	0.726278	1.46573	3.11018	0.745657	0.0423871	0.80967	2.22147	5.22452	1.31278	5.19176
Minimum e	-2.86971	-1.38854	-1.84014	-1.45511	-0.223568	0.00490282	-4.57608	-2.34246	-0.325059	-5.47175	-4.51694	-2.75248	-2.71617	-3.60925	-4.29083	-3.29957	-4.77626	-5.51614	-2.53939	-1.61494	-3.97085	-6.04982	-4.35369	-6.41973	-1.7158	-7.53784	-2.58799	-7.88425	-2.4688	-3.35407	-0.799931	-2.80457	-5	-4.95166	-5.1222	-1.37728	-1.70334	-2.14221	-4.48059	-5.2752	-3.02148	-3.7306	-4.63216	-5.93119	-6.3097	-4.27911	-6.46044	-8.07464	-1.95216
Max - Av	1.28621	0.925956	1.13525	0.619482	0.373073	0.086935	1.74297	1.52909	0.820286	2.77103	1.20886	1.18288	1.18068	2.33066	1.8089	1.441	2.54131	2.58334	1.07115	1.42076	4.06005	2.13316	1.37623	3.96412	3.72884	2.15781	1.31583	2.85729	2.04352	1.63935	3.3599	2.01884	1.9975	2.09904	1.73032	1.5579	1.58534	0.839884	1.68226	1.98433	2.30022	2.58611	1.46977	2.77176	3.61496	2.599	5.81811	5.26715	3.68079
Min - Av	-2.26518	-1.20762	-1.42997	-0.999887	-0.217662	-0.111979	-3.52689	-1.87768	-0.662526	-4.64927	-3.58981	-1.97063	-1.88235	-3.35015	-3.7548	-2.42178	-3.45191	-3.85501	-1.71866	-1.96674	-4.67745	-4.88631	-3.36123	-2.58403	-3.02696	-7.05408	-2.8566	-5.23923	-2.35775	-1.94657	-1.33337	-2.32905	-3.08791	-2.93802	-3.47729	-1.64181	-1.75982	-1.74278	-3.3468	-4.01715	-2.18699	-4.25467	-3.90805	-3.20182	-3.50441	-3.90158	-5.86685	-4.12027	-3.46313
CDP - Av	0.732959	0.309353	0.538595	0.583651	0.134333	0.0115443	1.17762	0.593211	-0.209041	0.950909	1.05555	0.910278	0.962247	0.387533	0.664458	1.00622	1.45278	1.78955	0.949151	-0.223373	-0.578179	1.29195	1.12089	3.96412	-1.18274	0.61218	-0.14018	2.73043	0.196457	1.49291	-0.448032	0.560926	1.9975	2.09904	1.73032	-0.179127	0.02892	0.484838	1.2192	1.34346	0.919897	-0.481684	0.766502	2.77176	2.84768	0.419919	0.635979	3.99676	-1.33072
ECM - Av	0.732959	0.309353	0.538595	0.583651	0.134333	0.0115443	1.17762	0.593211	-0.209041	0.950909	1.05555	0.910278	0.962247	0.387533	0.664458	1.00622	1.45278	1.78955	0.949151	-0.223373	-0.578179	1.29195	1.12089	3.96412	-1.18274	0.61218	-0.14018	2.73043	0.196457	1.49291	-0.448032	0.560926	1.9975	2.09904	1.73032	-0.179127	0.02892	0.484838	1.2192	1.34346	0.919897	-0.481684	0.766502	2.77176	2.84768	1.3404	5.81811	3.99676	-1.33072
Optimized - Av	0.732959	0.309353	0.538595	0.583651	0.134333	0.0115443	1.17762	0.593211	-0.209041	0.950909	1.05555	0.910278	0.962247	0.387533	0.664458	1.00622	1.45278	1.78955	0.949151	-0.223373	-0.578179	1.29195	1.12089	3.96412	-1.18274	0.61218	-0.14018	2.73043	0.196457	1.49291	-0.448032	0.560926	1.9975	2.09904	1.73032	-0.179127	0.02892	0.484838	1.2192	1.34346	0.721394	-0.481684	0.766502	2.77176	2.84768	1.3404	5.81811	3.99676	-0.594297
Max - CDP	0.553248	0.616604	0.59665	0.0358309	0.238739	0.0753907	0.565352	0.935879	1.02933	1.82013	0.153306	0.2726	0.21843	1.94313	1.14444	0.434781	1.08854	0.793789	0.121994	1.64413	4.63823	0.841217	0.255339	0	4.91158	1.54563	1.45601	0.126866	1.84706	0.146441	3.80793	1.45791	0	0	0	1.73702	1.55642	0.355046	0.463062	0.640871	1.38032	3.06779	0.70327	0	0.767283	2.17909	5.18213	1.2704	5.01151
Positions allowed to mutate during design (X)													X				X			X	X		X	X				X												X		X	X	X	X	X	X	X	X
[truncated: 67 more columns]

## Sheet: B-CDP01
Enrichment ratios (e) below were calculated from deep sequencing data, according to the following equation:
e = log2([(mutant counts in sorted population)/(mutant counts in naïve library)]/[(WT counts in sorted population)/(WT counts in naïve library)])
Raw data (fastq files) and annotated analyzed data can be found at:
http://www.ncbi.nlm.nih.gov/geo/query/acc.cgi?acc=GSE80194
ND = no data
WT e highlighted in yellow
Construct name:	B-CDP01
Residue number	1	2	3	4	5	6	7	8	9	10	11	12	13	14	15	16	17	18	19	20	21	22	23	24	25	26	27	28	29	30	31	32	33	34	35	36	37	38	39	40	41	42	43	44	45	46	47	48	49
CDP sequence	A	D	P	K	K	V	L	D	K	A	K	D	Q	A	E	N	R	V	R	E	L	K	Q	E	L	E	R	L	Y	K	E	A	R	K	L	D	L	T	Q	E	M	R	R	K	L	E	W	R	Y
ECM sequence	A	D	P	K	K	I	L	D	K	A	K	D	Q	V	E	N	R	V	R	E	L	K	Q	E	L	E	R	L	Y	K	E	A	R	K	L	D	L	T	Q	E	M	R	R	K	L	H	V	R	Y
Optimized design sequence	A	D	P	K	K	I	L	D	K	A	K	D	Q	V	E	N	R	V	R	E	L	K	Q	E	L	E	R	L	Y	K	E	A	R	K	L	D	L	T	Q	E	M	R	R	K	L	H	V	R	Y
A	0.509384	-0.816302	-2.50073	-5.86039	-0.96712	-0.517217	-6.0869	-1.86283	-0.67055	0.509384	-7.05028	-1.03016	-3.85495	0.509384	-1.41291	-3.01981	-1.79102	-2.20152	-1.38286	-1.08549	-8.36633	-1.49889	-0.684682	-1.27847	-8.22253	-2.26462	-7.76217	-3.38546	-3.21678	-5.94297	-1.65495	-1.63284	-6.13952	-3.19827	-4.14985	-0.91704	-4.07624	-1.83783	-3.66791	-0.834132	-4.97097	-2.56837	-0.586059	-9.224	-6.88317	2.59142	-3.80807	-2.08731	-6.65926
C	-2.50076	-7.09294	-0.481961	-6.07475	-7.78249	-7.1566	-7.38195	-5.77643	-6.02002	-2.32211	-6.29269	-1.56373	-4.142	-0.585399	-0.883364	-5.10015	-0.901736	-3.2132	-1.93888	-8.05447	-7.76217	-6.9264	-8.67428	-1.17901	-3.2872	-4.77298	-1.86363	-4.18619	-1.77198	-4.27666	-2.05306	-7.23465	-1.96982	-4.94674	-5.1144	-6.33787	-7.34105	-8.44269	-7.43735	-8.58864	-1.39341	-1.52476	-0.832318	-8.69	-3.14202	-1.01598	-3.49538	-3.44607	-2.04857
D	-1.51817	0.509384	-6.91886	-4.57371	-5.94455	-1.47156	-6.74146	0.509384	-2.42348	-7.30378	-5.44138	0.509384	-4.44365	-7.06609	-0.126388	-1.51471	-8.24711	-3.17587	-6.64499	-1.1725	-7.8009	-3.20409	-8.11374	0.455653	-8.03342	0.213274	-7.79442	-2.87085	-1.5914	-7.31549	-0.998628	-3.6878	-7.88337	-0.458709	-3.03011	-1.63284	-7.68484	-7.62604	-3.88215	-1.03293	-4.37087	-5.92321	-0.513634	-8.34146	-8.04439	-0.544103	-7.86419	-1.89566	-2.73869
E	-1.14763	0.363704	-6.19753	-0.487185	-0.684906	-6.89482	-7.16993	-0.290425	-1.28735	0.395508	-1.4943	-0.319265	-2.19765	-0.679205	0.509384	-6.142	-3.5182	-8.26209	-7.07658	0.509384	-8.03342	-1.19404	-3.88249	0.509384	-8.22748	0.509384	-8.07682	-7.52216	-3.90792	-2.52977	-1.63284	-0.752808	-7.0648	-2.42117	-7.83098	-2.01039	-7.94764	-8.04335	-3.47243	-1.63284	-7.34729	-7.87574	-2.177	-4.6163	-8.11374	-3.77506	-7.43856	-0.637499	-6.68143
F	0.000445755	-6.52147	1.21682	-4.89149	-1.23929	-0.0617445	-3.29753	-7.14975	-1.93812	-4.7828	-7.24223	-0.694357	-1.4527	-6.6176	-4.6906	-2.76805	-1.73998	-2.93961	-4.06319	-7.48381	-3.51828	-0.935561	-8.35315	1.06243	-6.85784	-0.382042	-7.31843	-6.44392	-2.18504	-6.2688	-0.731934	-5.87314	-2.65942	-7.91192	-6.65182	-6.48997	-5.43974	-7.3635	-0.84178	-2.66731	-0.897765	-7.08391	0.996941	-8.04891	-7.8863	6.62974	3.60599	-5.93073	-1.34198
G	-4.93421	-0.96982	-0.392998	-0.305013	-4.4665	-3.74213	-1.96927	-1.65715	-7.78837	-4.9299	-1.21767	-1.74034	-1.55049	-1.89166	-2.54407	-3.11309	-2.09404	-4.31294	-1.92483	-1.78334	-7.8756	-9.16823	-6.65237	-1.80921	-7.63012	-1.92272	-2.84149	-3.92545	-4.22801	-5.42845	-1.57662	-1.8689	-2.05723	-1.36579	-3.12968	-2.95028	-3.80962	-1.14847	-1.15076	-1.61348	-2.20707	-0.650855	-0.417	-9.83858	-8.66703	-0.189475	-2.82767	-0.463725	-8.19538
H	-6.30445	-1.36628	-5.18741	-4.60751	-4.31378	-6.69587	-6.04439	-1.66879	-4.25267	-6.69587	-3.47506	-1.77462	-1.3913	-6.26679	-6.9684	-2.52951	-0.344235	-8.28083	-0.345087	-7.43854	-7.50779	-2.57981	-0.822789	0.260497	-7.47573	-5.63261	-0.789222	-6.24732	-1.28318	-5.3777	-2.83149	-7.37626	-1.08645	-0.990594	-6.65313	-1.58118	-4.40077	-3.07583	-1.70034	-6.13265	-6.76065	-1.68547	-0.629644	-8.69589	-5.24002	4.23087	-0.641969	-3.69385	-4.18333
I	-7.33228	-4.42998	-3.7519	0.305546	-2.29505	0.880657	-5.71008	-5.67243	-1.69817	-6.47573	-7.02634	-6.30378	-7.46761	-6.84549	-7.18741	-1.18309	-7.17721	-2.33482	-8.4806	-7.08746	-7.82018	-0.385978	-7.8009	-0.0242383	-7.17721	0.452146	-5.71008	-2.62941	-6.75951	-3.92124	-2.44892	-7.11797	-1.77868	-2.81928	-7.7223	-3.80184	-4.85374	-2.35093	-7.8458	-2.42578	-0.510942	-5.45196	-0.63791	-8.69589	-5.37951	3.99199	3.51403	-4.9542	-5.47928
K	-5.80736	-2.26005	-4.65237	0.509384	0.509384	-5.24793	-4.24793	-3.58496	0.509384	-5.16992	0.509384	-6.12928	0.184237	-5.55459	0.0298041	0.353049	-2.13496	-7.71008	-1.68152	-0.11957	-7.34873	0.509384	-0.723148	0.404096	-7.60733	0.140678	-6.37504	-7.83575	-6.64066	-1.63284	-0.611492	-5.81119	-6.92068	-1.63284	-7.63572	-0.429611	-4.03006	-5.9776	-0.579753	-1.17272	-0.763433	-7.57024	-3.64504	-3.77506	-7.82655	-2.81434	0.956805	-7.05528	-7.36908
L	-4.37344	-1.90461	-1.32027	-3.89259	-1.57371	-2.96531	0.509384	-6.10375	-1.29857	-7.34691	-0.754487	-3.16319	-2.57509	-0.183231	-5.51744	-3.93713	-0.415492	-3.78681	-2.19553	-3.0904	0.509384	-6.55448	-4.10209	-0.35376	0.509384	-7.12247	-0.924492	-1.63284	-4.87355	-4.36018	-0.517581	-6.23518	-1.91666	-3.40158	-1.63284	-3.58697	-1.63284	-6.52042	-1.8844	-2.16656	-0.188704	-0.953841	0.0234697	-6.35574	-3.77506	6.54511	0.930494	-4.79257	-2.03273
M	-0.172746	-0.413168	-6.58496	-4.46392	-7.00344	-6.56122	0.272834	-5.45943	-7.99766	-6.42626	-1.20272	-7.37504	-7.63012	-2.2303	-7.09803	-2.90802	-0.310031	-7.82018	-7.76155	-7.59225	-0.797017	-6.38933	-5.41021	-1.09527	-1.20141	-1.23406	-5.19146	-0.991098	-7.73522	-1.38473	-0.195948	-1.77091	-7.52972	-8.2503	-1.77061	-7.42115	-1.41598	-8.24631	-1.71927	-7.91585	-1.63284	-7.84961	-4.29967	-8.63014	-8.09276	4.52795	1.78166	-2.95824	-7.25902
N	-6.18982	-0.0376588	-5.08746	-0.133418	-0.426356	-5.20945	-3.90689	-0.167915	-0.706037	-4.64386	-0.31111	-0.488052	-5.4127	-4.70044	-5.97728	0.509384	0.0475085	-7.93074	-3.51879	-7.25739	-7.33985	0.395016	-1.96515	-4.33311	-7.59246	-0.487269	-7.05528	-1.31279	-1.10047	-1.28293	-2.21063	-7.38717	-0.443145	-0.431217	-7.85066	-0.02978	-7.64543	-1.85662	-4.72049	-3.28887	-2.84953	-5.73559	-0.0234897	-5.95256	-4.46136	-1.90732	-2.84503	-5.24713	-5.03198
P	-2.98956	-6.31378	0.509384	-2.29078	0.488854	-8.51964	-1.55649	-5.93853	-6.16104	-4.55264	-3.58581	-7.98868	-1.42248	-4.14145	-8.79116	-7.02634	-2.57932	-8.67596	-3.78182	-7.76818	-1.02164	-6.68152	-1.62888	-5.13358	-1.33522	-7.90087	-3.31969	-2.26632	-5.61946	-2.6872	-0.157261	-1.30727	-3.86898	-3.54764	-2.09	-2.01116	-1.25041	-0.629716	-0.804884	-4.01949	-5.86352	-1.46479	-0.638529	-8.94252	-5.85786	0.987105	0.481831	-2.94573	-2.98358
Q	-7.40088	-5.22748	0.286204	0.354768	-0.0763393	-6.33985	-1.53569	-4.20758	-1.32844	-6.78136	-0.757551	-5.83289	0.509384	-5.65237	-2.17516	-3.00509	-3.76946	-7.2384	-2.2376	-1.9203	-4.04366	-0.297811	0.509384	-0.992176	-2.98762	-2.90364	-4.81902	-3.0672	-6.55058	-0.914376	-0.848068	-4.13944	-7.5859	-0.914959	-1.91931	0.974073	-1.96255	-6.06166	-1.63284	-1.49804	-4.57381	-7.82142	-0.794097	-6.1322	-7.9542	0.0322236	-8.23244	-0.408934	-7.74495
R	-4.75928	-1.56604	-1.53861	-0.0677908	-2.7789	-5.21066	-5.19609	-0.530922	-0.723694	-2.78007	-1.28388	-2.75507	-1.42577	-6.8463	-6.74439	-5.30097	0.509384	-5.82364	0.509384	-4.10375	-4.48139	-2.63988	-0.0860992	-0.346897	-0.255769	-1.18677	0.509384	-1.80802	-7.69187	-3.53147	-2.96727	-2.0328	-1.63284	-2.39321	-1.42083	-1.75056	-1.0808	-3.81478	-0.501386	-6.73194	-0.504032	-1.63284	-1.63284	-5.34276	-8.2665	-2.88909	0.719429	-3.77506	-5.44093
S	-0.664747	1.03018	-1.11386	-1.79222	-2.012	-1.49777	-3.38343	-0.908829	-5.79433	-2.37979	-1.02351	-3.61799	-4.21709	0.400189	-1.64151	-2.25657	-0.868327	-6.42685	-1.34781	-8.93664	-9.8009	-3.40745	-3.66493	-2.03334	-4.65946	-3.41308	-1.34756	-2.78807	-0.628621	-2.96855	-2.14237	-1.89761	-2.78315	-6.26507	-3.01088	-3.00175	-3.61896	-2.74291	-6.96052	-6.23923	-1.53829	-1.41454	-2.40236	-7.51988	-9.85331	2.63489	-4.41383	-3.10253	-2.79177
T	-0.984952	-5.59225	-0.120121	1.53975	0.128078	-2.38913	-0.109212	0.905758	-0.0147947	-2.02502	-0.115034	-6.28559	-5.11981	-1.20367	-7.7211	-0.752038	-1.26005	-5.06854	-1.02274	-3.17814	0.785829	-0.67592	-4.25821	-1.67079	-8.42998	-2.72302	-3.55823	-8.70833	-2.30929	-1.69069	-0.889677	-1.13839	-5.1544	-0.530038	-7.71842	-0.876907	-2.27273	-1.63284	-1.93929	-3.01636	-2.15892	-4.56388	-3.47332	-5.63415	-5.11009	-1.14151	-0.265653	-4.58387	-8.39961
V	-1.18781	-2.79519	-0.524666	-5.62929	-2.52271	0.509384	-1.53019	-2.35686	-2.61231	-2.05858	-3.09211	-1.17295	-1.7551	0.23774	-3.27749	-3.62262	-1.48425	0.509384	-2.71573	0.0550643	-3.28639	-9.68152	-1.95998	-1.21736	-5.09655	-2.67597	-2.38558	-2.43162	-6.59947	-6.04381	-2.00359	-2.03251	-4.87462	-5.2926	-4.17616	-1.29515	-4.26712	-4.32451	-2.72805	-2.1379	-1.52737	-2.44155	-1.23116	-9.76487	-5.52953	3.80736	2.80805	-2.06005	-3.70937
W	-7.85996	-6.66702	-2.62827	-1.00595	-1.33175	-7.49982	-4.641	1.53305	-5.90939	-7.12777	-2.18144	-9.54347	-4.10375	-5.9965	-1.07141	-2.40379	-7.78585	-6.71008	-8.55336	-1.40121	-4.39706	-8.40939	-6.06446	-4.00113	-3.84501	-8.61471	-2.45862	-5.86209	-7.06687	-1.4462	-1.2649	-3.19349	-2.02902	-6.9048	-2.31376	-8.70798	-2.14562	-7.43058	1.35164	-3.17246	-0.554143	-3.37899	-0.561571	-8.29921	-3.46767	6.85865	-3.77506	-3.48771	-4.73046
Y	-6.60751	0.103814	-3.58198	-7.20758	-2.67952	-6.42626	-6.22748	-0.121182	-0.766587	-6.80736	-6.90689	-0.274963	-6.47229	-6.44295	-0.99459	-3.05832	-1.92787	-6.00729	-2.86209	-0.717326	-8.41785	-1.52628	-8.26209	-1.05079	-8	-8.11447	-7.70044	-5.30023	-1.63284	-5.99715	-3.49184	-3.23723	-4.53723	-6.61413	-7.49774	-0.936157	-4.17793	-6.77725	-1.51539	-4.68848	-4.73775	-6.06712	-0.876448	-8.76818	-7.2713	5.97286	-2.93538	-3.3323	-2.532
STOP	0.454	-2.98519	-6.90802	-1.02239	-2.12992	-6.79441	-6.30378	-3.81902	-3.02166	-6.66702	-1.587	0.352	-1.38224	-7.10852	-1.01974	-7.74147	-8.22253	-7.98868	-7.93248	-0.510293	-3.39521	-2.17516	-1.4855	-0.949544	-4.40106	-0.878755	-2.87896	-7.57591	-1.32022	-3.12153	-1.44535	-8.00191	-8.0632	-4.27866	-8.17342	-8.05015	-4.26374	-1.3001	-2.32566	-1.8326	-2.57761	-7.64321	-2.3795	-6.3107	-8.07682	0.193	-4.9961	-8.50383	-2.3599
CDP e	0.509384	0.509384	0.509384	0.509384	0.509384	0.509384	0.509384	0.509384	0.509384	0.509384	0.509384	0.509384	0.509384	0.509384	0.509384	0.509384	0.509384	0.509384	0.509384	0.509384	0.509384	0.509384	0.509384	0.509384	0.509384	0.509384	0.509384	-1.63284	-1.63284	-1.63284	-1.63284	-1.63284	-1.63284	-1.63284	-1.63284	-1.63284	-1.63284	-1.63284	-1.63284	-1.63284	-1.63284	-1.63284	-1.63284	-3.77506	-3.77506	-3.77506	-3.77506	-3.77506	-2.532
ECM e	0.509384	0.509384	0.509384	0.509384	0.509384	0.880657	0.509384	0.509384	0.509384	0.509384	0.509384	0.509384	0.509384	0.23774	0.509384	0.509384	0.509384	0.509384	0.509384	0.509384	0.509384	0.509384	0.509384	0.509384	0.509384	0.509384	0.509384	-1.63284	-1.63284	-1.63284	-1.63284	-1.63284	-1.63284	-1.63284	-1.63284	-1.63284	-1.63284	-1.63284	-1.63284	-1.63284	-1.63284	-1.63284	-1.63284	-3.77506	-3.77506	4.23087	2.80805	-3.77506	-2.532
Optimized e	0.509384	0.509384	0.509384	0.509384	0.509384	0.880657	0.509384	0.509384	0.509384	0.509384	0.509384	0.509384	0.509384	0.23774	0.509384	0.509384	0.509384	0.509384	0.509384	0.509384	0.509384	0.509384	0.509384	0.509384	0.509384	0.509384	0.509384	-1.63284	-1.63284	-1.63284	-1.63284	-1.63284	-1.63284	-1.63284	-1.63284	-1.63284	-1.63284	-1.63284	-1.63284	-1.63284	-1.63284	-1.63284	-1.63284	-3.77506	-3.77506	4.23087	2.80805	-3.77506	-2.532
Average e	-3.61129	-2.59835	-2.52858	-2.52871	-2.34861	-4.15085	-3.79769	-2.52548	-2.94411	-4.48524	-2.99726	-3.3772	-3.29705	-3.58784	-3.71417	-2.93894	-2.38961	-5.3705	-3.45131	-3.98132	-5.4162	-3.56261	-4.13001	-1.19135	-5.37065	-3.00179	-4.33911	-4.06076	-4.16964	-3.75006	-1.56145	-3.78638	-3.99578	-3.51454	-4.66596	-2.73973	-4.0527	-4.79519	-2.68166	-3.54878	-2.76757	-4.18293	-1.21758	-7.56341	-6.54112	1.72666	-1.68725	-3.34292	-4.86767
Maximum e	0.509384	1.03018	1.21682	1.53975	0.509384	0.880657	0.509384	1.53305	0.509384	0.509384	0.509384	0.509384	0.509384	0.509384	0.509384	0.509384	0.509384	0.509384	0.509384	0.509384	0.785829	0.509384	0.509384	1.06243	0.509384	0.509384	0.509384	-0.991098	-0.628621	-0.914376	-0.157261	-0.752808	-0.443145	-0.431217	-1.42083	0.974073	-1.0808	-0.629716	1.35164	-0.834132	-0.188704	-0.650855	0.996941	-3.77506	-3.14202	6.85865	3.60599	-0.408934	-1.34198
Minimum e	-7.85996	-7.09294	-6.91886	-7.20758	-7.78249	-8.51964	-7.38195	-7.14975	-7.99766	-7.34691	-7.24223	-9.54347	-7.63012	-7.06609	-8.79116	-7.02634	-8.24711	-8.67596	-8.55336	-8.93664	-9.8009	-9.68152	-8.67428	-5.13358	-8.42998	-8.61471	-8.07682	-8.70833	-7.73522	-7.31549	-3.49184	-7.38717	-7.88337	-8.2503	-7.85066	-8.70798	-7.94764	-8.44269	-7.8458	-8.58864	-7.34729	-7.87574	-4.29967	-9.83858	-9.85331	-3.77506	-8.23244	-7.05528	-8.39961
Max - Av	4.12067	3.62853	3.74539	4.06845	2.85799	5.0315	4.30707	4.05853	3.45349	4.99463	3.50664	3.88659	3.80643	4.09722	4.22356	3.44833	2.899	5.87989	3.96069	4.4907	6.20203	4.07199	4.6394	2.25378	5.88003	3.51117	4.8485	3.06966	3.54102	2.83568	1.40419	3.03357	3.55264	3.08333	3.24513	3.7138	2.9719	4.16548	4.0333	2.71465	2.57886	3.53208	2.21453	3.78835	3.3991	5.13198	5.29324	2.93399	3.52569
Min - Av	-4.24868	-4.49459	-4.39029	-4.67888	-5.43389	-4.36879	-3.58427	-4.62427	-5.05355	-2.86167	-4.24497	-6.16627	-4.33307	-3.47825	-5.07698	-4.0874	-5.8575	-3.30545	-5.10205	-4.95532	-4.3847	-6.11891	-4.54427	-3.94223	-3.05933	-5.61292	-3.7377	-4.64758	-3.56559	-3.56543	-1.93039	-3.6008	-3.88758	-4.73575	-3.1847	-5.96825	-3.89494	-3.6475	-5.16414	-5.03986	-4.57972	-3.6928	-3.08208	-2.27516	-3.31219	-5.50173	-6.54519	-3.71236	-3.53194
CDP - Av	4.12067	3.10773	3.03796	3.03809	2.85799	4.66023	4.30707	3.03486	3.45349	4.99463	3.50664	3.88659	3.80643	4.09722	4.22356	3.44833	2.899	5.87989	3.96069	4.4907	5.92558	4.07199	4.6394	1.70074	5.88003	3.51117	4.8485	2.42792	2.5368	2.11722	-0.0713855	2.15354	2.36294	1.8817	3.03312	1.10689	2.41986	3.16235	1.04882	1.91594	1.13473	2.5501	-0.415255	3.78835	2.76606	-5.50173	-2.08781	-0.432139	2.33567
ECM - Av	4.12067	3.10773	3.03796	3.03809	2.85799	5.0315	4.30707	3.03486	3.45349	4.99463	3.50664	3.88659	3.80643	3.82558	4.22356	3.44833	2.899	5.87989	3.96069	4.4907	5.92558	4.07199	4.6394	1.70074	5.88003	3.51117	4.8485	2.42792	2.5368	2.11722	-0.0713855	2.15354	2.36294	1.8817	3.03312	1.10689	2.41986	3.16235	1.04882	1.91594	1.13473	2.5501	-0.415255	3.78835	2.76606	2.50421	4.4953	-0.432139	2.33567
Optimized - Av	4.12067	3.10773	3.03796	3.03809	2.85799	5.0315	4.30707	3.03486	3.45349	4.99463	3.50664	3.88659	3.80643	3.82558	4.22356	3.44833	2.899	5.87989	3.96069	4.4907	5.92558	4.07199	4.6394	1.70074	5.88003	3.51117	4.8485	2.42792	2.5368	2.11722	-0.0713855	2.15354	2.36294	1.8817	3.03312	1.10689	2.41986	3.16235	1.04882	1.91594	1.13473	2.5501	-0.415255	3.78835	2.76606	2.50421	4.4953	-0.432139	2.33567
Max - CDP	0	0.5208	0.707432	1.03036	0	0.371274	0	1.02366	0	0	0	0	0	0	0	0	0	0	0	0	0.276446	0	0	0.553046	0	0	0	0.641741	1.00422	0.718463	1.47558	0.880031	1.18969	1.20162	0.21201	2.60691	0.552038	1.00312	2.98448	0.798707	1.44413	0.981984	2.62978	0	0.633046	10.6337	7.38106	3.36613	1.19001
Positions allowed to mutate during design (X)													X			X	X			X	X			X																			X	X	X	X	X	X	X
[truncated: 67 more columns]

## Sheet: Figure 5B. histogram
Difference to maximum e for all designable CDP residues (Max - CDP)
Residue number	1	2	3	4	5	6	7	8	9	10	11	12	13	14	15	16	17	18	19	20	21	22	23	24	25	26	27	28	29	30	31	32	33	34	35	36	37	38	39	40	41	42	43	44	45	46	47	48	49
2-CDP06 (Max - CDP)	0.314423	0.503739	0.60757	0.920771	0.996334	0	0.856777	0.977473	0.288222	5.87513	0.197639	1.54291	0.301063	3.68683	0.659111	0.228515	1.01122	3.35441	1.31786	4.34915	5.96289	0	1.78835	4.2609	4.76617	1.11896	3.1018	0	0.310595	0.496781	0.012678	2.88508	0	0	1.23712	0.276089	1.6292	0	0	0	0	1.5679	1.13598	0.592753	0	2.88781	6.41369	0	6.09247
average (Max - Av)	0.19938	0.540758	1.32527	4.02196	4.25847	4.57115	4.13095	3.90562	2.9883	7.62448	3.22367	5.34726	3.33266	4.89204	3.84104	2.90501	3.8598	7.07038	5.24011	3.66924	8.40422	4.9804	4.83087	8.79659	6.90411	4.86554	5.93617	4.6821	3.8344	4.97538	3.48951	4.9616	5.17504	4.83562	3.24117	3.45898	5.30374	4.44793	3.94612	3.79245	3.33807	4.87513	5.10776	3.68731	3.9605	3.46221	7.28811	4.65404	6.56272
designable																	X			X	X																		X				X	X		X	X	X	X
X-CDP07	0.284473	3.16418	2.22076	0.218008	0.737281	0.629913	0.923838	1.73302	0	2.46674	0.0189004	1.60156	0	4.83409	1.03327	0	2.99737	3.63532	0.697434	1.36832	2.52628	0	2.30235	4.64342	0	2.0829	2.67479	4.41338	0	2.62781	5.25799	1.09302	0	3.74071	1.79811	2.54588	1.16188	0.334483	1.58568	1.78021	0.649001	1.58266	1.38319	0.540993	6.30548	4.71845e-16	5.28756	2.49146	0
average	0.328358	2.52477	1.53647	3.24488	4.55488	3.04556	4.32373	3.2983	4.45065	5.22032	3.44109	3.44676	5.05548	5.69487	4.31272	3.19022	7.0121	6.23497	4.8026	4.03156	6.45771	3.83271	5.17933	3.4223	4.53063	4.26943	4.70951	5.31144	4.11901	6.94894	3.60588	4.63362	4.20067	8.50812	5.56507	2.8012	5.69557	3.13221	4.4561	2.27937	4.77856	5.03426	3.69917	3.8517	8.1997	5.43392	9.05845	4.43665	5.1889
designable													X			X	X			X	X		X	X	X		X	X											X	X	X	X	X	X	X	X	X	X	X
W-CDP03	ND	2.02969	2.57498	2.29745	1.31195	1.46108	2.66691	1.62943	1.15995	4.18925	0.932137	1.69046	1.09301	3.05611	1.13825	2.0413	3.85496	1.40095	1.38736	0.975521	2.10409	1.33682	1.37521	0.932137	2.48028	3.20301	1.69046	2.02331	0.932137	0.932137	1.69046	1.8571	0.932137	0.932137	0.932137	1.21805	0.932137	0.932137	2.13298	0.932137	1.21509	0.932137	0.932137	2.35788	0.932137	0.932137	1.45273	0.932137	4.15995
average	ND	2.85398	3.6564	2.61241	2.46864	3.56829	4.42254	3.08493	3.38087	6.1616	2.40118	2.33614	2.37913	3.5794	1.80237	3.49434	5.5928	2.48712	2.80216	3.67988	3.0754	3.3601	1.68606	3.36054	3.45967	3.63753	1.92989	3.37698	2.33831	1.62454	2.42162	3.5376	2.13181	2.0261	1.72504	1.63239	2.15245	2.79737	3.33909	1.38216	2.87837	2.41956	2.27211	3.03624	2.49642	2.69068	2.12462	1.95571	3.99929
designable						X	X		X	X			X	X		X	X	X		X	X			X	X			X				X					X						X	X	X	X	X	X	X
F-CDP01	0.553248	0.616604	0.59665	0.0358309	0.238739	0.0753907	0.565352	0.935879	1.02933	1.82013	0.153306	0.2726	0.21843	1.94313	1.14444	0.434781	1.08854	0.793789	0.121994	1.64413	4.63823	0.841217	0.255339	0	4.91158	1.54563	1.45601	0.126866	1.84706	0.146441	3.80793	1.45791	0	0	0	1.73702	1.55642	0.355046	0.463062	0.640871	1.38032	3.06779	0.70327	0	0.767283	2.17909	5.18213	1.2704	5.01151
average	1.28621	0.925956	1.13525	0.619482	0.373073	0.086935	1.74297	1.52909	0.820286	2.77103	1.20886	1.18288	1.18068	2.33066	1.8089	1.441	2.54131	2.58334	1.07115	1.42076	4.06005	2.13316	1.37623	3.96412	3.72884	2.15781	1.31583	2.85729	2.04352	1.63935	3.3599	2.01884	1.9975	2.09904	1.73032	1.5579	1.58534	0.839884	1.68226	1.98433	2.30022	2.58611	1.46977	2.77176	3.61496	2.599	5.81811	5.26715	3.68079
designable													X				X			X	X		X	X				X												X		X	X	X	X	X	X	X	X
B-CDP01	0	0.5208	0.707432	1.03036	0	0.371274	0	1.02366	0	0	0	0	0	0	0	0	0	0	0	0	0.276446	0	0	0.553046	0	0	0	0.641741	1.00422	0.718463	1.47558	0.880031	1.18969	1.20162	0.21201	2.60691	0.552038	1.00312	2.98448	0.798707	1.44413	0.981984	2.62978	0	0.633046	10.6337	7.38106	3.36613	1.19001
average	4.12067	3.62853	3.74539	4.06845	2.85799	5.0315	4.30707	4.05853	3.45349	4.99463	3.50664	3.88659	3.80643	4.09722	4.22356	3.44833	2.899	5.87989	3.96069	4.4907	6.20203	4.07199	4.6394	2.25378	5.88003	3.51117	4.8485	3.06966	3.54102	2.83568	1.40419	3.03357	3.55264	3.08333	3.24513	3.7138	2.9719	4.16548	4.0333	2.71465	2.57886	3.53208	2.21453	3.78835	3.3991	5.13198	5.29324	2.93399	3.52569
designable													X			X	X			X	X			X																			X	X	X	X	X	X	X
Only designable: Max - CDP
2-CDP06	1.01122	4.34915	5.96289	0	1.13598	0.592753	2.88781	6.41369	0	6.09247	2.37225	6.49799	1.57468	4.73121	2.54377	6.39827	4.11112	3.25139	0	0	1.11174	1.04475	1.84266	2.23743	2.49253	4.44449	2.9346	1.17121	1.82989	0	0.762366	2.35312	1.47395	2.85732	7.5907	1.52732	3.54959	2.44732	2.69898	2.83732	1.6065	2.44952	0	1.70515
X-CDP07	0	0	2.99737	1.36832	2.52628	2.30235	4.64342	0	2.67479	4.41338	1.58568	1.78021	0.649001	1.58266	1.38319	0.540993	6.30548	4.71845e-16	5.28756	2.49146	0	6.44023	7.26887	0	3.71977	5.58928	4.90465	4.39961	5.10935	3.24386	6.00544	6.00457	4.47573	2.62611	0	5.0433	5.12281	0.976657	0.0751111	4.91711	0.495772	0	3.86076	0.37349	2.98795	0	0	0	0.122634
W-CDP03	1.46108	2.66691	1.15995	4.18925	1.09301	3.05611	2.0413	3.85496	1.40095	0.975521	2.10409	0.932137	2.48028	2.02331	1.8571	0.932137	0.932137	2.35788	0.932137	0.932137	1.45273	0.932137	4.15995	1.85182	0.932137	2.10761	1.33503	4.15306	4.57568	2.13772	1.60798	0.899418	6.78324	7.48464	1.10822	0.932137	0.932137	0.932137	0.872287	0.932137	1.4056	0.932137	1.68479	1.37509	1.46681	2.2389	0.983356	2.53498	2.86621
F-CDP01	0.21843	1.08854	1.64413	4.63823	0.255339	0	0.126866	0.640871	3.06779	0.70327	0	0.767283	2.17909	5.18213	1.2704	5.01151	3.41131	4.82537	2.39814	3.42825	0	0.463791	3.03623	0.0172661	0	3.70925	1.66698	0	2.89313	0	1.71418	2.67982	1.53049	0.728641	2.38902	0.635411	2.04127	0.25988	1.55627	4.97668	5.56359	3.43862	2.67896	4.56708	2.7288	0.659306	3.54854	5.10803	3.0256
B-CDP01	0	0	0	0	0.276446	0.553046	2.62978	0	0.633046	10.6337	7.38106	3.36613	1.19001	1.133	1.04739	2.35862	0.43205	0.686362	2.81007	2.57381	0.724988	2.13651	1.12133	5.46	0.889061	1.24811	0	0.871701	0.3298	0	0.133653	3.28588	0.861941	0.394082	0	0.570929	0	0	0	0.0181124	0	0	0
Only designable: Max - Av
2-CDP06	3.8598	3.66924	8.40422	3.94612	5.10776	3.68731	3.46221	7.28811	4.65404	6.56272	3.57844	10.4825	4.48572	5.6253	6.29949	4.92635	7.72921	4.57464	5.29017	5.0962	5.27912	5.63461	7.44292	5.44713	5.0187	7.35848	4.82813	5.86946	4.91527	4.98763	5.88104	4.72494	5.32077	6.35274	4.60543	4.51585	6.54505	4.81745	4.01299	4.68512	3.41104	4.31857	4.5024	2.65514
X-CDP07	5.05548	3.19022	7.0121	4.03156	6.45771	5.17933	3.4223	4.53063	4.70951	5.31144	4.4561	2.27937	4.77856	5.03426	3.69917	3.8517	8.1997	5.43392	9.05845	4.43665	5.1889	8.38362	8.11091	5.18183	6.29811	5.76195	7.49517	4.79203	7.24517	4.11015	8.32854	4.42174	4.82366	3.49035	3.62839	4.3827	7.0374	4.63966	3.56501	5.95451	3.29475	3.94913	7.15525	0.708435	5.36391	4.84288	4.5145	5.1281	4.06626
W-CDP03	3.56829	4.42254	3.38087	6.1616	2.37913	3.5794	3.49434	5.5928	2.48712	3.67988	3.0754	3.36054	3.45967	3.37698	3.5376	2.15245	2.27211	3.03624	2.49642	2.69068	2.12462	1.95571	3.99929	3.55982	3.18224	2.85926	3.9828	4.61346	5.46793	3.43515	3.76985	2.76369	8.1453	6.74751	3.91305	3.5312	4.5185	2.75967	3.29319	4.84604	3.53209	3.4821	3.59	3.98808	2.19097	4.16074	2.48599	4.40303	4.29052
F-CDP01	1.18068	2.54131	1.42076	4.06005	1.37623	3.96412	2.85729	1.98433	2.58611	1.46977	2.77176	3.61496	2.599	5.81811	5.26715	3.68079	5.95134	6.06663	3.32991	4.73702	3.08059	5.46833	3.5028	1.97766	3.70235	3.93008	2.83997	1.70551	2.90429	1.95385	2.90057	1.93236	2.05795	3.76272	4.75753	2.68861	4.54096	2.04493	2.19584	3.25637	4.66825	4.5073	2.08083	3.21251	3.27545	1.64339	1.86351	2.28553	1.70512
B-CDP01	3.80643	3.44833	2.899	4.4907	6.20203	2.25378	2.21453	3.78835	3.3991	5.13198	5.29324	2.93399	3.52569	2.69324	2.71582	2.97624	2.30535	3.32705	3.44297	4.45178	2.44007	2.5646	2.66193	5.09439	3.07065	1.86922	4.29033	2.64557	3.36305	3.58141	3.16594	5.71531	4.4636	4.17438	4.92573	2.06464	5.17516	3.7385	3.18536	4.13938	5.06104	4.01199	4.27849
Histogram calculations
designable residues: CDP dif to max (Max - CDP)			designable residues: average dif to max (Max - Av)
bins	count if in preceding bin		bins	count if in preceding bin
0			0
0.5	54		0.5	0
1	38		1	2
1.5	28		1.5	4
2	21		2	12
2.5	23		2.5	23
3	21		3	25
3.5	13		3.5	31
4	8		4	38
4.5	10		4.5	25
5	10		5	29
5.5	8		5.5	26
6	4		6	10
6.5	9		6.5	7
7	1		7	4
7.5	3		7.5	8
8	1		8	1
8.5	0		8.5	6
9	0		9	0
9.5	0		9.5	1
10	0		10	0
10.5	0		10.5	1
11	1		11	0
sum (check)	253		sum (check)	253
[truncated: 67 more columns]
