# Supplementary material for: Computationally designed high specificity inhibitors delineate the roles of BCL2 family proteins in cancer
Source: eLife. 2016 Nov 2;5:e20352. doi: 10.7554/eLife.20352 (PMC5127641; doi:10.7554/eLife.20352)
Supplement: Figure 7—source data 1. — (A) Survival assays for WT and modified HeLa cell lines after treatment with the indicated inhibitors or inhibitor combinations. Raw data have been normalized to the negative control (empty virus). (B) Long-term survival assays for engineered MEFs with indicated BCL2 dependency, after inducing expression of αMCL1 or αBFL1. All values have been normalized to uninduced controls. DOI: http://dx.doi.org/10.7554/eLife.20352.019 [file elife-20352-fig7-data1.xlsx]

## Sheet: A. Figure 7B. HeLa
				single inhibitors			doubles			triple
			empty virus (control)	aMCL1	aBCL2	aBCLXL	M+2	M+X	2+X	M+2+X
	control cells	Experiment 1	100	84.54	90.43	116.82	28.06	53.08	69.72	7.08
		2	100	86.4019	82.8482	103.691	21.1142	19.37	83.44	31.09
		3	100	73.6242	99.3204	108.177	39.22	42.3616	73.2998	39.8078
		Average	100	81.5221	90.8662	109.563	29.4647	38.2705	75.4866	25.9926
		SD	0	6.90279	8.24473	6.67309	9.13429	17.2233	7.11661	16.9489
	Mcl-1+	Experiment 1	100	96.57	76.23	114.46	19.92	75.17	79.78	6.25
		2	100	95.6697	97.4265	123.568	30.3166	42.6777	81.1097	40.5254
		3	100	70.0321	97.5456	106.782
		Average	100	87.4239	90.4007	114.937	25.1183	58.9238	80.4448	23.3877
		SD	0	15.0685	12.2723	8.403	7.35149	22.9755	0.940218	24.2364
	Bcl-2+	Experiment 1	100	103.77	71.22	111.01	40.13	113	75.21	6.95
		2	100	116.5	102.6	127.4	25.2	108.728	77.1145	9.04392
		3	100	105.608	104.409	118.037
		Average	100	108.626	92.743	118.816	32.665	110.864	76.1622	7.99696
		SD	0	6.88063	18.6614	8.2227	10.5571	3.02108	1.34665	1.48062
	Bcl-xL+	Experiment 1	100	109.49	75.78	111.77	74.37	109.94	82.35	38.73
		2	100	105.421	97.1524	133.087	107.993	76.5	99.5	72.03
		3	100	95.9113	102.675	112.283	79.76	85.5661	85.353	61.5926
		Average	100	103.607	91.8691	119.047	87.3744	90.6687	89.0677	57.4509
		SD	0	6.9686	14.2046	12.162	18.0586	17.2941	9.15859	17.032
		Legend	For double combinations:
			2 = Bcl-2, X = Bcl-xL, M = Mcl-1
		Notes:
		Values are percent cell survival after 72 hours, compared to treatment with empty virus.
		Control cells were generated by transfection with an empty vector (in place of a vector having the gene for BCL2 protein expression)
		Values represented in Figure 7B are color-coded as follows:
		average
		standard deviation

## Sheet: B. Figure 7–supplement 1A. MEFs
	induced expression of aMCL1
	cell line	Experiment 1	Experiment 2	Experiment 3	Average	Standard Deviation
	parental (+Bcl-xL,+Mcl-1)	106.016	54.7116	57.0475	72.5915	28.9696
	Bcl-2-dependent	85.7188	70.8607	81.2612	79.2803	7.62457
	Bcl-xL-dependent	103.254	82.0806	94.6888	93.3412	10.6509
	Bcl-w-dependent	88.0949	89.1828	79.2992	85.5256	5.41962
	Mcl-1-dependent	22.7035	6.12076	2.25647	10.3602	10.8628
	Bfl-1-dependent	75.6437	89.2176	111.14	92.0006	17.9112
	induced expression of aBFL1
	cell line	Experiment 1	Experiment 2	Experiment 3	Average	Standard Deviation
	parental (+Bcl-xL,+Mcl-1)	95.1357	97.8599		96.4978	1.92636
	Bcl-2-dependent	86.4945	81.8628		84.1787	3.27507
	Bcl-xL-dependent	94.0051	85.6541		89.8296	5.9051
	Bcl-w-dependent	70.7378	65.3972		68.0675	3.77639
	Mcl-1-dependent	96.0654	77.6955		86.8805	12.9895
	Bfl-1-dependent	8.27033	17.621	18.6266	14.8393	5.71105
	Long-term survival of engineered MEFs with indicated BCL2 dependency, after inducing expression of aMCL1 or aBFL1
	Two (aBFL1) or three (aMCL1) separate experiments were performed, each experiment including three replicate wells at each condition.
	The values above are averages of three replicates, normalized to uninduced controls (also three replicates per condition).
