# Supplementary material for: Computationally designed high specificity inhibitors delineate the roles of BCL2 family proteins in cancer
Source: eLife. 2016 Nov 2;5:e20352. doi: 10.7554/eLife.20352 (PMC5127641; doi:10.7554/eLife.20352)
Supplement: Figure 8—source data 1. — Survival assays for melanoma and glioblastoma. For each experiment, three technical replicates were averaged and normalized to the negative control (empty virus). The average and standard deviation were calculated using these values from independent experiments (experimental replicates). DOI: http://dx.doi.org/10.7554/eLife.20352.022 [file elife-20352-fig8-data1.xlsx]

## Sheet: Figure 8A. Melanoma
	LOX-IMVI		empty virus (control)	aBCL2	aBCLXL	aMCL1	aBFL1	2+X	2+M	2+F	X+M	X+F	M+F	2+X+M	2+X+F	2+M+F	X+M+F
		Experiment 1	100	93.5344	94.9643	72.4362	93.2349	104.786	53.8859	102.44	40.5806	52.9158	25.2436	15.5178	54.5895	7.14325	17.4298
		2	100	88.9592	97.0719	64.1092	87.4148	76.0744	22.9591	75.8783	28.7691	72.1586	8.50283	4.75555	26.4469	2.35696	2.02841
		3	100		96.4716	85.6633	100.287	91.657	78.6063	98.192	57.5932	90.6197	37.6464				32.5434
		4	100		98.7498	85.4485	93.8414				51.6153		23.2965
		5	100
		Average	100	91.2468	96.8144	76.9143	93.6944	90.8391	51.8171	92.1702	44.6396	71.898	23.6723	10.1367	40.5182	4.75011	17.3339
		Standard Deviation	0	3.23513	1.56552	10.542	5.2638	14.3732	27.8812	14.2682	12.7123	18.8533	11.9443	7.61003	19.8998	3.38442	15.2577
	SK-MEL-5		empty virus (control)	aBCL2	aBCLXL	aMCL1	aBFL1	2+X	2+M	2+F	X+M	X+F	M+F	2+X+M	2+X+F	2+M+F	X+M+F
		Experiment 1	100	89.168	103.257	91.9991	96.8925	96.5233	84.6531	91.3558	93.7238	66.2125	85.9613	65.6415	67.45	65.0193	52.8599
		2	100	89.0703	98.5987	74.4507	98.4325	86.7797	59.1579	76.967	64.0034	98.9692	55.4029	34.5072	39.8962	31.2869	30.6833
		3	100		113.375	100.075	98.7367	91.5742	89.004	85.2504	108.717	87.5456	70.16
		4	100		96.8463	92.8813	95.4463				97.4705		95.0749
		5	100								83.5057		75.1404
		Average	100	89.1192	103.019	89.8516	97.377	91.6257	77.605	84.5244	89.4841	84.2424	76.3479	50.0743	53.6731	48.1531	41.7716
		Standard Deviation	0	0.0691039	7.41513	10.8857	1.51933	4.87202	16.1231	7.22184	16.8573	16.6263	15.1786	22.0153	19.4835	23.8525	15.6812
		Legend	For double combinations:
			2 = Bcl-2, X = Bcl-xL, M = Mcl-1, F = Bfl-1
		Notes:
		Values are percent cell survival after 72 hours, normalized to the negative control (empy virus).
		Values represented in Figure 8A are color-coded as follows:
		average
		standard deviation

## Sheet: Figure 8B. Glioblastoma
	U87 parental		empty virus (control)	aBCL2	aBCLXL	aBCLW	aMCL1	aBFL1	2+X	2+W	2+M	2+F	X+W	X+M	X+F	W+M	W+F	M+F
		Experiment 1	100	74.3444	115.662	93.2794	92.3648	81.2245	11.1952	94.0853	35.5055	80.2363	29.9549	1.36643	17.2221	44.2718		11.8479
		2	100	92.3456	114.872	66.6907	87.8909	100.62	9.72383	5.12324	4.89334	75.9573	6.0478	1.94805	12.2708	5.08836	21.4128	59.9303
		3	100	83.2689	103.779	80.2755	92.9324	107.324	22.6108	3.07861	5.58519	58.4715	3.78763	5.04662	22.7308	10.7321	22.4853	58.4405
		4	100	100.436	115.928	74.7722	94.2729	112.77	32.7972	2.001	2.30515	68.8449	2.39671	4.06762	32.3272	15.9581	27.3834	50.8694
		Average	100	87.5986	112.56	78.7544	91.8653	100.485	19.0818	26.072	12.0723	70.8775	10.5468	3.10718	21.1377	19.0126	23.7605	45.272
		Standard Deviation	1.42109e-14	11.2805	5.87167	11.1756	2.76771	13.768	10.8064	45.3607	15.6858	9.51196	13.0259	1.73759	8.59648	17.4146	3.18304	22.6331
	U87 EGFR+		empty virus (control)	aBCL2	aBCLXL	aBCLW	aMCL1	aBFL1	2+X	2+W	2+M	2+F	X+W	X+M	X+F	W+M	W+F	M+F
		Experiment 1	100	100.994	103.6	129.133	114.62	103.096	3.15838	111.298	67.1549	103.483	2.76461	1.84283	13.7309	75.356		50.5126
		2	100	98.9688	103.736	75.9304	87.9222	98.4001	25.286	37.417	64.2014	92.9723	11.861	20.3107	23.2675	48.3984	46.5228	94.1071
		3	100	87.3578	129.278	97.2406	110.053	124.737	4.96099	6.75332	31.2755	49.734	2.65928	6.97742	13.8854	21.2694	19.3041	74.3782
		4	100	80.8542	126.532	86.415	110.708	111.783	5.84303	7.36479	33.1488	58.225	3.25207	7.81149	15.4903	24.1135	16.6012	81.7859
		Average	100	92.0436	115.787	97.1798	105.826	109.504	9.81211	40.7083	48.9452	76.1036	5.13423	9.2356	16.5935	42.2843	27.4761	75.1959
		Standard Deviation	8.20464e-15	9.57806	14.038	23.0105	12.1047	11.5703	10.3763	49.1883	19.3743	26.1356	4.49191	7.84086	4.51986	25.1855	16.5503	18.3575
	U87 EGRFvIII+		empty virus (control)	aBCL2	aBCLXL	aBCLW	aMCL1	aBFL1	2+X	2+W	2+M	2+F	X+W	X+M	X+F	W+M	W+F	M+F
		Experiment 1	100	89.2831	108.407	109.506	99.3474	87.4533	4.59751	130.449	102.907	109.552	19.1834	2.25318	28.3076	92.8434		55.9174
		2	100	109.973	109.87	88.7063	103.838	110.434	31.7162	28.3924	34.7407	93.0688	40.2343	25.2883	30.9589	30.4756	80.3243	87.9542
		3	100	85.5168	112.25	91.4475	94.0129	119.558	10.9518	5.7011	10.2714	76.3069	7.25574	13.3845	38.6726	25.6373	34.8503	92.1101
		4	100	100.436	115.928	74.7722	94.2729	112.77	32.7972	2.001	2.30515	68.8449	2.39671	4.06762	32.3272	15.9581	27.3834	50.8694
		Average	100	96.3021	111.614	91.108	97.8677	107.554	20.0157	41.636	37.5561	86.9433	17.2675	11.2484	32.5666	41.2286	47.5193	71.7128
		Standard Deviation	1.16031e-14	11.0991	3.28348	14.2738	4.67657	13.948	14.3776	60.3475	45.7011	18.1602	16.8574	10.554	4.39941	34.9352	28.6542	21.3212
		Legend	For double combinations:
			2 = Bcl-2, X = Bcl-xL, W = Bcl-w, M = Mcl-1, F = Bfl-1
		Notes:
		Values are percent cell survival after 72 hours, compared to treatment with empty virus (set to 100 %).
		Values represented in Figure 8B are color-coded as follows:
		average
		standard deviation
