# Supplementary material for: Computationally designed high specificity inhibitors delineate the roles of BCL2 family proteins in cancer
Source: eLife. 2016 Nov 2;5:e20352. doi: 10.7554/eLife.20352 (PMC5127641; doi:10.7554/eLife.20352)
Supplement: Figure 9—source data 1. — Short- and long-term survival assay for colon cancers. For short-term assays, all values have been normalized to the negative control (DMSO in media, equivalent to DMSO concentration diluted from small molecule stock solution). For long-term survival assays, all values have been normalized to uninduced (no doxycycline) negative control. DOI: http://dx.doi.org/10.7554/eLife.20352.024 [file elife-20352-fig9-data1.xlsx]

## Sheet: Figure 9A. Short-term colon
		Inhibited homolog:	Bcl-2	Bcl-xL	Mcl-1	Bfl-1	2+X	2+M	2+F	X+M	X+F	2+X+M	2+X+F
		Treatment:	ABT-199	A-1331852	aMCL1(dox)	aBFL1(dox)	ABT-263	ABT-199 +aMCL1 (dox)	ABT-199 +aBFL1 (dox)	A-1331852 +aMCL1 (dox)	A-1331852 +aBFL1 (dox)	ABT-263 +aMCL1 (dox)	ABT-263 +aBFL1 (dox)
Cell line	SW620	Experiment 1	0.985796	0.697888	0.682881	0.83083	0.525946	0.64232	0.787302	0.00313808	0.256265	0.00386747	0.238485
		2	1.04026	0.558516	0.896652	0.932562	0.545173	0.651425	0.912409	0.00423082	0.760032	0.00561329	0.812077
		3	0.990462	0.637385	0.908093	0.853572	0.621455	0.658345	0.887689	0.00485901	0.741758	0.00631899	0.781553
		Average	1.00551	0.631263	0.829209	0.872321	0.564191	0.650697	0.862466	0.00407597	0.586018	0.00526659	0.610705
		Std Dev	0.0301874	0.0698874	0.126853	0.0533945	0.0505147	0.00803715	0.0662577	0.000870853	0.285721	0.001262	0.322713
	HCT-116	1	1.01611	0.927492	0.60663	0.85823	0.919807	0.805119	0.609569	0.420508	0.609569	0.409141	0.703398
		2	0.995052	0.782626	0.923535	0.961901	0.831888	0.904668	0.752771	0.726308	0.752771	0.701317	0.846527
		3	0.950881	0.79306	0.936706	0.913973	0.842512	0.970152	0.721624	0.721824	0.721624	0.810048	0.751743
		Average	0.987346	0.834392	0.82229	0.911368	0.864736	0.893313	0.694655	0.62288	0.694655	0.640169	0.767222
		Std Dev	0.0332879	0.0807949	0.186883	0.0518845	0.0479883	0.0831002	0.0753141	0.175273	0.0753141	0.20733	0.0728094
	DLD1	1	0.954719	0.768583	0.918022	0.877956	0.791862	0.896594	0.897826	0.128671	0.516157	0.139041	0.636793
		2	0.929173	0.825081	0.940273	0.648725	0.847465	0.958534	0.505799	0.252403	0.38524	0.245266	0.448439
		3	0.97728	0.759783	0.884717	0.638699	0.794784	0.903319	0.55429	0.232794	0.489282	0.273637	0.518262
		Average	0.953724	0.784482	0.914337	0.721793	0.811371	0.919482	0.652638	0.204623	0.46356	0.219315	0.534498
		Std Dev	0.0240691	0.0354337	0.0279607	0.135333	0.031293	0.0339863	0.213718	0.0665027	0.069145	0.0709515	0.0952209
	RKO	1	0.936264	0.913228	0.848818	0.649441	0.845107	0.642106	0.591048	0.0471131	0.473344	0.0378162	0.497514
		2	0.994786	0.908783	0.850157	0.926044	0.818778	0.667786	0.843743	0.0558867	0.741492	0.0412534	0.677912
		3	1.00693	0.918114	0.934563	0.931784	0.939608	0.667864	0.868519	0.0861173	0.741162	0.0650249	0.718156
		Average	0.979327	0.913375	0.877846	0.835756	0.867831	0.659252	0.76777	0.063039	0.651999	0.0480315	0.631194
		Std Dev	0.0377847	0.0046674	0.049123	0.16138	0.0635394	0.014849	0.153546	0.0204621	0.15472	0.0148167	0.117506
	HT-29	1	1.00986	0.911525	0.798747	0.899551	0.895109	0.821322	0.900991	0.0973536	0.603534	0.106194	0.53965
		2	0.950679	0.790956	0.844389	0.980177	0.812207	0.884278	0.793975	0.101063	0.367841	0.0981146	0.320673
		3	0.915809	0.793619	0.928588	1.00578	0.85771	0.861596	1.01303	0.0405106	0.656667	0.0495455	0.771136
		Average	0.958781	0.832033	0.857241	0.961836	0.855009	0.855732	0.902666	0.0796422	0.542681	0.0846182	0.54382
		Std Dev	0.047544	0.0688547	0.0658677	0.0554386	0.0415167	0.0318852	0.109539	0.0339397	0.153729	0.0306413	0.225261
	Caco-2	1	1.21353	0.555861	1.05996	0.952091	0.774433	1.03651	1.01166	0.00818666	0.603231	0.106376	0.647021
		2	0.924344	0.725784	0.895998	0.450221	0.765151	0.867956	0.125283	0.0226106	0.0265656	0.185596	0.0321124
		3
		Average	1.06894	0.640822	0.977981	0.701156	0.769792	0.952231	0.568469	0.0153986	0.314898	0.145986	0.339567
		Std Dev	0.204487	0.120154	0.115942	0.354876	0.0065631	0.119182	0.626761	0.0101993	0.407764	0.0560168	0.434806
	SW48	1	0.955507	0.590048	0.546228	0.919003	0.592547	0.233022	0.821651	0.0261103	0.385652	0.0264802	0.39691
		2	0.889197	0.322336	0.474682	0.980177	0.373898	0.184382	0.793975	0.0266056	0.367841	0.0233369	0.320673
		3	0.761699	0.447428	0.877816	0.781007	0.419925	0.625245	0.642222	0.304899	0.168461	0.514977	0.214919
		Average	0.868801	0.453271	0.632909	0.893395	0.462123	0.347549	0.752616	0.119205	0.307318	0.188265	0.310834
		Std Dev	0.0985004	0.133952	0.215092	0.102025	0.115271	0.241718	0.0966001	0.160816	0.120583	0.282945	0.0913937
	Averages plotted in Figure 9A.
	Error bars (standard deviation) plotted in Figure 9A.

## Sheet: Figure 9B. Long-term colon
	induced expression of aMCL1
	cell line	Experiment 1	Experiment 2	Experiment 3	Average	Standard Deviation
	SW620	88.5726	79.5226	97.9293	88.6748	9.20373
	HCT-116	68.6048	83.5049	84.7572	78.9556	8.98588
	DLD1	85.7189	87.1486	80.9517	84.6064	3.24481
	RKO	92.5874	88.5455	92.4759	91.2029	2.30211
	HT-29	84.4567	100.354		92.4051	11.2408
	Caco-2	96.5259	86.4161	100.177	94.3731	7.1288
	SW48	71.7475	76.512	64.6925	70.984	5.9466
	induced expression of aMCL1
	cell line	Experiment 1	Experiment 2	Experiment 3	Average	Standard Deviation
	SW620	86.8249	81.8946	75.6533	81.4576	5.5986
	HCT-116	92.6216	107.073	49.4437	83.0461	29.9842
	DLD1	75.1589	70.9102	83.0782	76.3824	6.17555
	RKO	32.3287	41.2297	36.5664	36.7082	4.45218
	HT-29	87.0973	60.6495	69.5596	72.4355	13.4564
	Caco-2	96.2715	116.326	93.8055	102.134	12.3523
	SW48	60.4264	100.698		80.5621	28.4762
	Averages plotted in Figure 9B.
	Error bars (standard deviation) plotted in Figure 9B.

## Sheet: Fig 9-suppl 1A. Colon titration
				Averages plotted in Figure 9-supplement 1A.
				Error bars (standard deviation) plotted in Figure 9-supplement 1A.
			ABT-263 concentration (nM)	250	125	62.5	31.25	15.625	7.8125	3.90625	1.95312	DMSO	media only				A-1331852 concentration (nM)	250	125	62.5	31.25	15.625	7.8125	3.90625	1.95312	DMSO	media only
Cell line	SW620	+aMCL1 (dox)	Experiment 1	0.0248198	0.104999	0.32486	0.563392	0.729761	0.800045	0.829814	0.847619	0.815498	0.830326		SW620	+aMCL1 (dox)	Experiment 1	0.0042084	0.00434348	0.00726791	0.0222064	0.0784513	0.201391	0.389488	0.633337	0.829965	0.842799
			2	0.0171402	0.087209	0.251263	0.463168	0.651513	0.759918	0.77696	0.85758	0.848563	0.870592				2	0.00466595	0.00709107	0.00819251	0.0199503	0.0649443	0.179675	0.37526	0.550799	0.900722	0.906533
			3	0.0654275	0.196654	0.413978	0.597534	0.742932	0.794075	1.05685	0.794786	0.88598	0.834673				3	0.00499992	0.00760645	0.0111164	0.047567	0.160505	0.325852	0.523534	0.641444	0.874979	0.838192
			Average	0.0357958	0.129621	0.330034	0.541364	0.708069	0.784679	0.887875	0.833328	0.850014	0.845197				Average	0.00462476	0.006347	0.00885894	0.0299079	0.1013	0.235639	0.429428	0.608526	0.868555	0.862508
			Std Dev	0.0259474	0.0587303	0.0814807	0.0698388	0.0494197	0.0216508	0.148705	0.0337482	0.0352634	0.0220997				Std Dev	0.000397364	0.00175413	0.00200893	0.0153348	0.0517159	0.0788772	0.0818086	0.0501577	0.0358134	0.0381966
		no aMCL1	1	0.700938	0.882917	0.942826	0.952033	0.982822	0.982788	1.02513	0.977381	1	0.940504			no aMCL1	1	0.739606	0.871757	0.884681	0.946586	0.921872	0.980582	0.952873	0.989676	1	1.00608
			2	0.737776	0.966899	0.90312	0.933221	0.976374	0.993099	1.01099	0.969007	1	0.951395				2	0.713157	0.880223	0.81095	0.917168	0.871734	1.0165	0.948255	1.04059	1	1.04649
			3	0.803158	0.862149	0.884867	0.943666	1.02583	1.03175	1.01482	1.02239	1	1.01353				3	0.698867	0.812047	0.877168	0.859885	0.923276	0.924256	0.99406	0.958405	1	0.983562
			Average	0.747291	0.903988	0.910271	0.942973	0.995008	1.00254	1.01698	0.989592	1	0.968477				Average	0.71721	0.854676	0.8576	0.90788	0.905627	0.97378	0.965063	0.996223	1	1.01204
			Std Dev	0.0517699	0.0554631	0.0296338	0.00942513	0.0268852	0.0258093	0.00731451	0.0287095	0	0.0393961				Std Dev	0.0206697	0.0371591	0.0405739	0.0440908	0.0293611	0.046497	0.0252182	0.0414813	0	0.0318826
	HCT-116	+aMCL1 (dox)	1	0.726012	0.785622	0.758189	0.873449	0.838032	0.839822	0.869034	0.847351	0.859141	0.777832		HCT-116	+aMCL1 (dox)	1	0.526189	0.526718	0.557216	0.629726	0.660431	0.683006	0.744761	0.805375	0.776416	0.744768
			2	0.851144	0.896864	0.840305	0.927984	0.962808	0.945505	0.908256	0.938637	0.885251	0.904213				2	0.735062	0.805771	0.77903	0.862286	0.889645	0.927339	0.881304	0.905941	0.912455	0.894498
			3	0.892075	0.908782	0.924893	0.978624	0.959203	0.968396	0.93729	0.94427	0.926201	0.890354				3	0.808764	0.796464	0.856783	0.916006	0.926446	0.961802	0.928642	0.948016	0.915933	0.907502
			Average	0.823077	0.863756	0.841129	0.926686	0.920014	0.917908	0.90486	0.910086	0.890198	0.857467				Average	0.690005	0.709651	0.73101	0.802673	0.825507	0.857382	0.851569	0.886444	0.868268	0.848923
			Std Dev	0.0865163	0.0679281	0.0833551	0.0526	0.0710217	0.0685855	0.0342546	0.0544031	0.0338024	0.0693124				Std Dev	0.146577	0.158493	0.15545	0.152166	0.14414	0.151994	0.0954787	0.073292	0.0795649	0.0904345
		no aMCL1	1	0.894715	0.989413	1.04029	0.978231	1.00247	1.00636	1.02284	0.972504	1	1.00994			no aMCL1	1	0.718363	0.883996	0.929284	0.947516	0.909506	0.815352	0.902469	0.991657	1	1.04164
			2	0.892511	0.965223	0.986954	0.982378	1.06233	1.03003	1.07406	1.01881	1	1.03951				2	0.802934	0.944869	0.971717	0.918268	0.976074	1.0006	1.04707	0.966274	1	0.987045
			3	0.855245	0.981574	1.00558	1.01229	1.03233	1.0152	1.04701	1.02065	1	0.98951				3	0.814716	0.918981	0.933176	0.978435	0.990358	1.03591	1.04417	0.998823	1	1.00895
			Average	0.880824	0.978737	1.01094	0.990967	1.03238	1.0172	1.04797	1.00399	1	1.01299				Average	0.778671	0.915949	0.944726	0.948073	0.958646	0.95062	0.997901	0.985584	1	1.01255
			Std Dev	0.0221792	0.0123418	0.0270715	0.0185838	0.0299311	0.0119595	0.0256247	0.0272814	0	0.0251394				Std Dev	0.0525594	0.0305496	0.0234561	0.0300872	0.0431517	0.118468	0.0826594	0.0171028	0	0.0274764
	DLD1	+aMCL1 (dox)	1	0.606803	0.901116	0.965591	0.936544	0.959705	0.974393	0.93805	0.889524	0.937617	0.936481		DLD1	+aMCL1 (dox)	1	0.253138	0.326472	0.438357	0.584998	0.63838	0.756694	0.752676	0.774987	0.840363	0.745017
			2	0.643769	0.848194	0.903382	0.937707	0.964171	0.973992	0.971678	0.964535	0.938121	0.973341				2	0.341338	0.422924	0.56221	0.683372	0.841908	0.834515	0.88937	0.950348	0.951922	0.910749
			3	0.793797	0.932501	1.00684	0.97185	0.987744	1.00532	1.00797	0.970703	0.942594	0.934129				3	0.404451	0.459757	0.615352	0.748264	0.833987	0.913487	0.851482	0.889701	0.861025	0.860595
			Average	0.681456	0.893937	0.958603	0.9487	0.97054	0.984568	0.972566	0.941587	0.939444	0.947983				Average	0.332976	0.403051	0.53864	0.672211	0.771425	0.834899	0.831176	0.871679	0.884436	0.838787
			Std Dev	0.0990297	0.0426096	0.0520797	0.0200568	0.0150653	0.0179716	0.0349682	0.0451934	0.00273971	0.0219918				Std Dev	0.0760025	0.0688288	0.0908212	0.0822034	0.115288	0.078397	0.0705731	0.0890585	0.0593501	0.0849908
		no aMCL1	1	0.855513	1.00813	1.0088	0.970462	0.961274	1.06591	0.99302	1.05283	1	0.996465			no aMCL1	1	0.877813	0.967473	0.875622	0.992454	0.910102	0.982638	0.944006	0.973374	1	1.05416
			2	0.86357	0.974892	1.00946	1.03486	1.04091	1.02556	0.991025	1.03225	1	0.94093				2	0.963201	0.943115	0.961877	0.976176	0.978807	0.887647	1.02596	1.01233	1	1.00097
			3	0.975423	1.0423	1.07457	1.11775	1.06769	1.02979	1.08748	1.05432	1	1.01635				3	0.905208	0.871887	0.955395	0.932109	0.962064	0.971005	0.984978	0.96408	1	0.916588
			Average	0.898169	1.00844	1.03094	1.04102	1.02329	1.04042	1.02384	1.04647	1	0.98458				Average	0.915407	0.927492	0.930965	0.966913	0.950324	0.947097	0.984983	0.983262	1	0.990575
			Std Dev	0.0670252	0.0337055	0.0377829	0.0738391	0.0553517	0.0221764	0.0551238	0.0123338	0	0.0390871				Std Dev	0.0435983	0.0496712	0.0480376	0.0312207	0.0358254	0.0518129	0.0409788	0.0256001	0	0.0693745
	RKO	+aMCL1 (dox)	1	0.0698754	0.0985073	0.171989	0.41103	0.557739	0.689853	0.780677	0.807639	0.835708	0.857093		RKO	+aMCL1 (dox)	1	0.0573498	0.0807765	0.0776177	0.09186	0.102582	0.140163	0.204253	0.342674	0.780122	0.814139
			2	0.0931056	0.136989	0.256935	0.450251	0.663442	0.805914	0.895973	0.845096	0.912937	0.867067				2	0.0824679	0.0930964	0.109552	0.123927	0.144108	0.202679	0.385996	0.541011	0.903597	0.900095
			3	0.155143	0.232687	0.395665	0.586902	0.810541	0.873464	0.923226	0.91822	0.914551	0.943276				3	0.130507	0.14088	0.143725	0.184357	0.219614	0.324446	0.4739	0.653501	0.885265	0.897229
			Average	0.106041	0.156061	0.274863	0.482728	0.677241	0.789744	0.866625	0.856985	0.887732	0.889145				Average	0.0901082	0.104918	0.110298	0.133382	0.155435	0.222429	0.354716	0.512395	0.856328	0.870488
			Std Dev	0.0440813	0.0690932	0.112911	0.0923247	0.126965	0.0928677	0.0756703	0.0562412	0.0450615	0.0471429				Std Dev	0.0371721	0.0317475	0.0330599	0.0469679	0.0593328	0.0937155	0.137518	0.157377	0.0666296	0.0488201
		no aMCL1	1	0.801181	0.887705	0.944716	0.914849	0.869132	0.864604	0.849327	1.00842	1	0.853739			no aMCL1	1	0.841516	0.930594	0.889716	0.93894	0.935608	0.965023	0.976277	0.942978	1	0.909055
			2	0.906776	0.959465	0.964493	1.03017	1.01513	1.00689	1.05867	1.04847	1	0.987472				2	0.811583	0.916673	0.972262	0.99568	1.04303	0.982282	1.03406	1.01271	1	0.996068
			3	0.940302	0.997192	0.998851	1.04483	1.03927	1.06385	1.06682	1.01951	1	1.02328				3	0.915964	0.972845	1.00784	0.961725	0.995437	1.02464	0.988487	0.995843	1	0.93628
			Average	0.882753	0.94812	0.969353	0.996618	0.974511	0.978447	0.991605	1.02547	1	0.95483				Average	0.856354	0.940037	0.956607	0.965448	0.991358	0.990648	0.999609	0.983842	1	0.947135
			Std Dev	0.072605	0.055618	0.0273924	0.0711926	0.092056	0.102624	0.123284	0.0206804	0	0.0893596				Std Dev	0.0537494	0.0292524	0.0605998	0.0285526	0.0538264	0.0306752	0.0304558	0.0363805	0	0.0445106
	HT-29	+aMCL1 (dox)	1	0.201268	0.543144	0.835556	0.949618	0.887164	0.926297	1.02439	0.951311	0.898296	0.842952		HT-29	+aMCL1 (dox)	1	0.12369	0.145716	0.1754	0.267549	0.487252	0.674579	0.813745	0.909419	0.899532	0.924438
			2	0.185571	0.405362	0.763865	0.857462	0.847375	0.873926	0.907036	0.728084	0.958943	0.89308				2	0.100888	0.109799	0.144358	0.231221	0.458763	0.706644	0.90432	0.883204	0.934138	0.978773
			3	0.182186	0.589589	0.859627	0.887868	0.905475	0.906845	0.905816	0.901092	0.89419	0.875116				3	0.0463962	0.0685294	0.121055	0.276106	0.556305	0.791352	0.882824	0.915909	0.965195	0.9603
			Average	0.189675	0.512698	0.819683	0.898316	0.880005	0.902356	0.945748	0.860162	0.917143	0.870383				Average	0.0903248	0.108015	0.146937	0.258292	0.500773	0.724192	0.866963	0.902844	0.932955	0.954504
			Std Dev	0.0101815	0.0958131	0.0498157	0.0469576	0.0297043	0.0264726	0.0681096	0.117106	0.0362581	0.0253973				Std Dev	0.0397149	0.0386244	0.0272643	0.023831	0.050157	0.060332	0.0473251	0.0173155	0.0328473	0.0276277
		no aMCL1	1	0.687318	1.00319	1.021	1.04131	1.01951	0.979003	0.944138	0.937604	1	0.980853			no aMCL1	1	0.933671	0.857662	0.950928	0.991298	0.975514	1.02189	0.984999	0.930815	1	1.00781
			2	0.900407	0.999433	0.975115	0.91137	1.09197	1.02039	0.965856	1.01652	1	0.982903				2	0.802527	1.06216	0.959522	1.02361	0.99689	0.990362	1.0688	1.01938	1	1.05048
			3	0.921701	0.973901	0.996814	0.968837	0.980317	0.997486	0.975085	0.991451	1	0.980495				3	0.880635	0.973537	1.002	0.992456	1.02591	1.02737	1.05226	1.07059	1	1.05814
			Average	0.836476	0.992174	0.997642	0.973838	1.0306	0.998959	0.961693	0.981857	1	0.981417				Average	0.872277	0.964453	0.970816	1.00245	0.999439	1.01321	1.03535	1.00693	1	1.03881
			Std Dev	0.129612	0.015936	0.022952	0.0651126	0.0566467	0.0207312	0.0158881	0.0403216	0	0.00129932				Std Dev	0.0659703	0.102551	0.0273443	0.0183299	0.0252959	0.0199741	0.0443858	0.0707167	0	0.0271215
	Caco-2	+aMCL1 (dox)	1	0.876779	0.960769	0.878765	1.08124	1.06109	1.07478	1.06654	1.00997	0.95598	1.01445		Caco-2	+aMCL1 (dox)	1	0.0104132	0.0168408	0.0445022	0.154264	0.317664	0.515518	0.60847	0.803094	0.846825	0.855568
			2	0.748786	0.864557	0.853838	0.87385	0.895794	0.87773	0.910755	0.929718	0.863917	0.875399				2	0.030435	0.0608564	0.153333	0.320262	0.491155	0.646832	0.736021	0.800387	0.850091	0.847746
			3														3
			Average	0.812782	0.912663	0.866302	0.977542	0.978442	0.976254	0.988646	0.969845	0.909948	0.944925				Average	0.0204241	0.0388486	0.0989177	0.237263	0.404409	0.581175	0.672246	0.801741	0.848458	0.851657
			Std Dev	0.0905043	0.0680316	0.0176263	0.146644	0.116882	0.139335	0.110155	0.0567477	0.0650988	0.0983246				Std Dev	0.0141575	0.0311237	0.0769552	0.117378	0.122677	0.0928529	0.0901924	0.00191364	0.00230993	0.00553108
		no aMCL1	1	1.01128	1.11034	1.03069	1.02847	1.05261	1.09142	1.07687	1.05683	1	1.08194			no aMCL1	1	0.651351	0.686786	0.742734	0.79979	0.830774	0.920062	0.961288	0.956969	1	0.967232
			2	0.908214	0.958492	0.965217	0.997122	0.983824	0.999354	1.02208	1.00375	1	0.969464				2	0.7587	0.831639	0.878278	0.860956	0.938519	0.896216	0.934769	0.933393	1	1.01678
			3														3
			Average	0.959745	1.03441	0.997956	1.0128	1.01822	1.04539	1.04947	1.03029	1	1.0257				Average	0.705025	0.759212	0.810506	0.830373	0.884646	0.908139	0.948028	0.945181	1	0.992007
			Std Dev	0.0728753	0.107371	0.0462989	0.0221658	0.0486398	0.0650992	0.0387435	0.0375343	0	0.0795317				Std Dev	0.0759073	0.102426	0.0958435	0.0432506	0.076187	0.0168616	0.0187514	0.0166708	0	0.0350365
	SW48	+aMCL1 (dox)	1	0.0327811	0.0487914	0.0654192	0.107577	0.180358	0.299519	0.414715	0.435603	0.60518	0.515717		SW48	+aMCL1 (dox)	1	0.0302704	0.0348632	0.0372852	0.0397923	0.044815	0.0701878	0.0917669	0.142248	0.57589	0.56941
			2	0.0331529	0.0397621	0.0717064	0.0883876	0.161546	0.196666	0.347848	0.36413	0.466859	0.532887				2	0.0333217	0.0350962	0.0317917	0.0435832	0.0524659	0.0828303	0.113984	0.187591	0.617389	0.528084
			3	0.0474887	0.0641328	0.0945022	0.146248	0.195865	0.297291	0.378484	0.395821	0.513274	0.521376				3	0.0289705	0.0287428	0.0378751	0.0385355	0.0499968	0.0720954	0.0889248	0.134435	0.477276	0.47553
			Average	0.0378075	0.0508955	0.0772092	0.114071	0.179256	0.264492	0.380349	0.398518	0.528437	0.523326				Average	0.0308542	0.0329007	0.0356507	0.040637	0.0490926	0.0750378	0.0982254	0.154758	0.556852	0.524341
			Std Dev	0.00838616	0.0123209	0.0153025	0.0294716	0.0171857	0.0587495	0.0334722	0.0358127	0.0703963	0.0087495				Std Dev	0.00223359	0.0036028	0.00335498	0.00262774	0.00390476	0.00681554	0.0137214	0.0287016	0.0719701	0.0470514
		no aMCL1	1	0.736171	0.761368	0.779107	0.795387	0.852279	0.958812	0.883989	0.961545	1	0.963202			no aMCL1	1	0.651668	0.728221	0.752789	0.788271	0.861571	0.875277	0.890817	0.999049	1	1.005
			2	0.478357	0.650735	0.80456	0.839557	0.907942	0.883095	0.953382	0.896246	1	0.955933				2	0.732198	0.684401	0.753614	0.737747	0.802385	0.780949	0.857162	0.93941	1	0.753377
			3	0.531769	0.663313	0.828126	0.905189	0.936766	0.961312	0.98398	0.983486	1	1.02176				3	0.40177	0.516531	0.489204	0.550607	0.575584	0.690739	0.73368	0.525904	1	0.877558
			Average	0.582099	0.691805	0.803931	0.846711	0.898995	0.934406	0.94045	0.947092	1	0.980297				Average	0.595212	0.643051	0.665202	0.692208	0.746513	0.782321	0.82722	0.821454	1	0.878646
			Std Dev	0.136077	0.0605706	0.0245153	0.0552495	0.0429481	0.0444546	0.0512347	0.0453805	0	0.036089				Std Dev	0.172297	0.111739	0.15242	0.125205	0.150958	0.0922768	0.0827371	0.257685	0	0.125816

## Sheet: Fig 9-suppl 1B. Colon EC50
		SW620	HCT-116	DLD1	RKO	HT-29	Caco-2	SW48
	ABT-263	250	250	250	250	250	250	250
	Std Dev	0	0	0	0	0	0	0
	ABT-263 +aMCL1	47.46	250	250	31.28	127.5	250	7.307
	Std Dev	8.3804			5.22468	15.9084		1.29538
	A-1331	250	250	250	250	250	250	250
	Std Dev	0		0	0	0	0	0
	A-1331 +aMCL1	3.762	250	54.32	2.198	15.02	14.55	0.3691
	Std Dev	0.302411		24.4884	0.483715	0.822622	2.86909	0.632866
	Gray boxes indicate this cell line exhibited greater than 50% survival at the highest concentration assayed (250 nM); thus, EC50 is at least 250 nM.
	Data from Figure 9-supplement 1A. was analyzed and EC50 values and standard error calculated with nonlinear regression using the Prism software.
	All values in nM.
