# Supplementary material for: Computationally designed high specificity inhibitors delineate the roles of BCL2 family proteins in cancer
Source: eLife journal article supplement (doi:10.7554/elife.20352), 2016-11-02
Supplement: supp [file elife_poa_e20352_Figure_5_figure_supplement_2.pdf › elife_poa_e20352_Figure_5_figure_supplement_2.pdf]

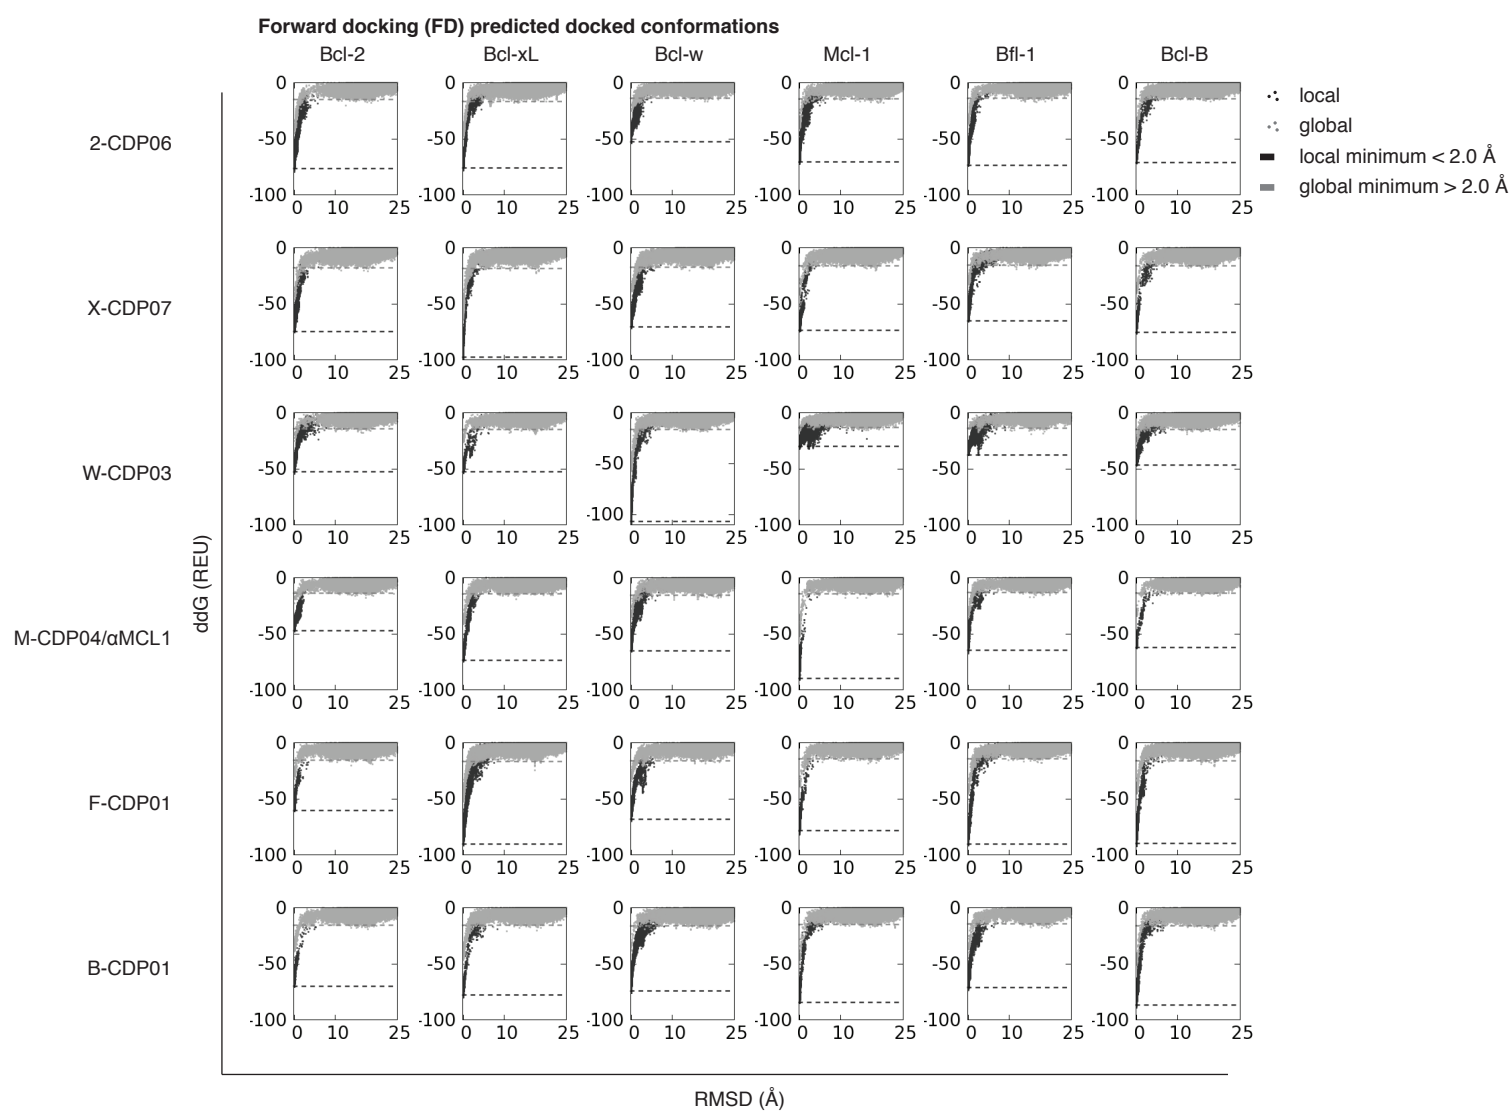

**Absolute binding energy (local FD ddG minimum)**

|               | Bcl-2 | Bcl-xL | Bcl-w  | Mcl-1 | Bfl-1 | Bcl-B |
|---------------|-------|--------|--------|-------|-------|-------|
| 2-CDP06       | -76.4 | -76.0  | -52.8  | -70.8 | -73.4 | -71.5 |
| X-CDP07       | -74.7 | -97.7  | -70.3  | -73.6 | -65.3 | -75.7 |
| W-CDP03       | -52.8 | -52.8  | -106.1 | -30.2 | -37.6 | -46.7 |
| M-CDP04/αMCL1 | -47.1 | -73.4  | -65.0  | -89.9 | -64.6 | -62.5 |
| F-CDP01       | -60.6 | -90.2  | -68.0  | -78.6 | -90.6 | -89.9 |
| B-CDP01       | -69.8 | -77.9  | -74.4  | -84.6 | -70.9 | -86.7 |

**Relative binding energy (local vs. global minima)**

|               | Bcl-2 | Bcl-xL | Bcl-w | Mcl-1 | Bfl-1 | Bcl-B |
|---------------|-------|--------|-------|-------|-------|-------|
| 2-CDP06       | -61.5 | -59.5  | -38.8 | -56.2 | -59.4 | -57.3 |
| X-CDP07       | -57.0 | -79.4  | -52.8 | -57.6 | -49.9 | -59.8 |
| W-CDP03       | -38.6 | -37.7  | -89.8 | -16.8 | -23.7 | -32.0 |
| M-CDP04/αMCL1 | -33.3 | -58.9  | -49.4 | -75.7 | -51.5 | -49.0 |
| F-CDP01       | -45.1 | -73.7  | -52.0 | -64.1 | -76.3 | -73.9 |
| B-CDP01       | -54.2 | -62.2  | -58.1 | -69.6 | -56.4 | -70.6 |

**Dissociation constants ( $K_d$ )**

|               | Bcl-2          | Bcl-xL           | Bcl-w             | Mcl-1       | Bfl-1             | Bcl-B             |
|---------------|----------------|------------------|-------------------|-------------|-------------------|-------------------|
| 2-CDP06       | 9 ± 1          | 12,000 ± 1,000   | 1,700 ± 100       | > 50,000    | > 50,000          | > 50,000          |
| X-CDP07       | 4 ± 1          | 0.59 ± 0.07      | 14.9 ± 0.5        | 17 ± 1      | > 50,000          | 107 ± 9           |
| W-CDP03       | 30 ± 20        | 7 ± 1            | 8 ± 1             | 57 ± 8      | 500 ± 300         | 410 ± 80          |
| M-CDP04/αMCL1 | 20,000 ± 2,000 | 340,000 ± 10,000 | 200,000 ± 200,000 | 0.15 ± 0.06 | 200,000 ± 200,000 | 20,000 ± 10,000   |
| F-CDP01       | 27 ± 8         | 11 ± 1           | 600 ± 80          | 4.6 ± 0.6   | 2 ± 2             | 100,000 ± 100,000 |
| B-CDP01       | 17 ± 3         | 20 ± 4           | 2,000 ± 500       | 0.46 ± 0.09 | 520 ± 30          | 8 ± 1             |
