# Supplementary material for: Computationally designed high specificity inhibitors delineate the roles of BCL2 family proteins in cancer
Source: eLife journal article supplement (doi:10.7554/elife.20352), 2016-11-02
Supplement: supp [file elife_poa_e20352_Figure_5_figure_supplement_3.pdf › elife_poa_e20352_Figure_5_figure_supplement_3.pdf]

|               | Bcl-2 | Bcl-xL | Bcl-w | Mcl-1 | Bfl-1 | Bcl-B |
|---------------|-------|--------|-------|-------|-------|-------|
| αBCL2         | -70.3 | -78.5  | -57.8 | -75.3 | -71.9 | -71.2 |
| αBCLXL        | -69.7 | -99.0  | -65.1 | -64.7 | -60.6 | -74.2 |
| αBCLW         | -55.1 | -67.0  | -92.7 | -43.3 | -39.6 | -54.5 |
| M-CDP04/αMCL1 | -47.1 | -73.4  | -65.0 | -89.9 | -64.6 | -62.5 |
| αBFL1         | -76.7 | -68.8  | -59.7 | -64.0 | -72.3 | -63.7 |
| αBCLB         | -55.2 | -71.9  | -64.3 | -62.2 | -56.9 | -74.9 |

|                        |                | Bcl-2 | Bcl-xL | Bcl-w | Mcl-1 | Bfl-1 | Bcl-B |
|------------------------|----------------|-------|--------|-------|-------|-------|-------|
| M-CDP04/ $\alpha$ MCL1 | $\alpha$ BCL2  | -55.7 | -63.7  | -42.9 | -61.7 | -58.9 | -56.7 |
|                        | $\alpha$ BCLXL | -52.2 | -80.0  | -47.5 | -48.2 | -45.0 | -57.8 |
|                        | $\alpha$ BCLW  | -40.7 | -51.4  | -76.6 | -30.1 | -25.9 | -39.5 |
|                        | $\alpha$ BFL1  | -33.3 | -58.9  | -49.4 | -75.7 | -51.5 | -49.0 |
|                        | $\alpha$ BFL1  | -62.5 | -54.6  | -44.5 | -50.8 | -59.7 | -49.7 |
|                        | $\alpha$ BCLB  | -39.6 | -55.2  | -48.8 | -47.3 | -41.5 | -58.9 |

|               | Bcl-2          | Bcl-xL           | Bcl-w             | Mcl-1       | Bfl-1             | Bcl-B           |
|---------------|----------------|------------------|-------------------|-------------|-------------------|-----------------|
| αBCL2         | 0.8 ± 0.5      | 3,500 ± 300      | 1,900 ± 300       | > 75 uM     | > 75 uM           | > 75 uM         |
| αBCLXL        | 4,000 ± 1,000  | 5.6 ± 0.4        | 40,000 ± 10,000   | > 75 uM     | > 75 uM           | > 75 uM         |
| αBCLW         | 5,700 ± 1,000  | 1,600 ± 100      | 1.0 ± 0.2         | > 25 uM     | > 25 uM           | > 25 uM         |
| M-CDP04/αMCL1 | 20,000 ± 2,000 | 340,000 ± 10,000 | 200,000 ± 200,000 | 0.15 ± 0.06 | 200,000 ± 200,000 | 20,000 ± 10,000 |
| αBFL1         | 320 ± 40       | 900 ± 200        | 7,400 ± 600       | 1,700 ± 800 | 1.0 ± 0.6         | 31,000 ± 8,000  |
| αBCLB         | > 25 uM        | > 25 uM          | > 25 uM           | > 25 uM     | > 25 uM           | 25 ± 6          |
