# Supplementary material for: Computationally designed high specificity inhibitors delineate the roles of BCL2 family proteins in cancer
Source: eLife. 2016 Nov 2;5:e20352. doi: 10.7554/eLife.20352 (PMC5127641; doi:10.7554/eLife.20352)
Supplement: Supplementary file 1. — (A) Summary of computational designs selected for protein production and biochemical analysis. (B) Sequences of computational designs and optimized variants. (C) Crystallographic data collection and refinement statistics. (D) Protein cross-linking of the αMCL1-Mcl-1 complex. (E) Sort conditions for all in vitro evolution experiments. (F) Mutation summary for evolved variants. DOI: http://dx.doi.org/10.7554/eLife.20352.026 [file elife-20352-supp1.xlsx]

## Sheet: A. Models
	Summary of computational designs selected for protein production and biochemical analysis.
	Design	Target PDB	PDB description	Residues kept fixed (numbered as on BINDI scaffold)	Residues borrowed from	Binds target?	Binding energy (ddg)	Shape complementarity (Sc)	Buried unsatisfied polar atoms (unsat)
	2-CDP01	2XA0	Bcl-2•Bax-BH3	L54, I57, G58, D59, F61	Bad-BH3	+	-35.2669	0.509289	10
	2-CDP02	2XA0	Bcl-2•Bax-BH3	L54, I57, G58, D59, F61	Bad-BH3	+	-41.0808	0.529427	9
	2-CDP03	4AQ3	Bcl-2•phenylacyl sulfonamide	A51, L54, G58, D59	BINDI	+	-29.2064	0.580547	2
	2-CDP04	4IEH	Bcl-2/Bcl-XL•N-heteroaryl sulfonamide	Y49, A51, L54, G58, D59, N62	BINDI	-	-24.6658	0.528941	7
	2-CDP05	4IEH	Bcl-2/Bcl-XL•N-heteroaryl sulfonamide	A51, L54, G58, D59	BINDI	-	-17.011	0.554712	5
	2-CDP06	4LVT	Bcl-2•navitoclax	L54, G58, D59	BINDI	+	-25.7035	0.467105	5
	2-CDP07	4LVT	Bcl-2•navitoclax	L54, G58, D59, N62	BINDI	+	-25.7202	0.466163	11
	X-CDP01	1PQ1	Bcl-XL•Bim-BH3	I50, A51, L54, G58, D59	Bim-BH3	+	-40.5426	0.613795	9
	X-CDP02	1PQ1	Bcl-XL•Bim-BH3	Y49, I50, A51, L54, G58, D59	Bim-BH3, BINDI	+	-37.9138	0.575281	7
	X-CDP03	2YQ6	Bcl-XL•BimSAHB	I50, A51, L54, I57, G58, D59, N62	Bim-BH3	+	-32.0914	0.622902	8
	X-CDP04	2YQ6	Bcl-XL•BimSAHB	Y49, I50, A51, L54, I57, G58, D59, N62	Bim-BH3, BINDI	+	-34.2881	0.554852	4
	X-CDP05	2YQ6	Bcl-XL•BimSAHB	Y49, I50, A51, L54, I57, G58, D59, N62	BINDI	+	-32.6508	0.603245	11
	X-CDP06	2YQ7	Bcl-XL•BimLOCK	A52, I54, F57, G58, D59, F61	XG10 peptide1	+	-44.9274	0.643131	6
	X-CDP07	2YQ7	Bcl-XL•BimLOCK	A52, I54, F57, G58, D59, F61	XG10 peptide1	+	-47.9744	0.61353	4
	X-CDP08	2YQ7	Bcl-XL•BimLOCK	A52, I54, F57, G58, D59, F61	XG10 peptide1	+	-31.7966	0.631045	7
	X-CDP09	3PL7	Bcl-XL•Bax-BH3	L50, S51, L54, K55, I57, G58, D59, D62	Bax-BH3	-	-24.8947	0.637508	7
	X-CDP10	4BPK	Bcl-XL•Puma-a/b-foldamer	I50, A51, L54, G58, D59	BINDI	+	-40.6185	0.587325	3
	X-CDP11	4BPK	Bcl-XL•Puma-a/b-foldamer	Y49, I50, A51, L54, I57, G58, D59, N62	BINDI	+	-31.2246	0.549465	4
	W-CDP01	1PQ1*	Bcl-XL•Bim-BH3	L54, I57, G58, D59, F61, N62	Bim-BH3	+	-29.6374	0.563108	7
	W-CDP02	2YJ1*	Bcl-XL•Puma-a/b-foldamer	L54, I57, G58, D59, F61, N62	Bim-BH3	+	-28.4893	0.557322	10
	W-CDP03	3FDL*	Bcl-XL•Bim-BH3	L54, I57, G58, D59, F61, N62	Bim-BH3	+	-29.7158	0.532155	4
	W-CDP04	4K5A	Bcl-w•DARPIN	G58, D59	BINDI	-	-19.4883	0.435829	3
	W-CDP05	4K5A	Bcl-w•DARPIN	Y49, G58, D59	BINDI	-	-25.4117	0.522469	5
	M-CDP01	2PQK	Mcl-1•Bim-BH3	E47, I50, A51, L54, R55, I57, G58, D59, F61, N62	Bim-BH3	+	-38.3045	0.665342	8
	M-CDP02	2PQK	Mcl-1•Bim-BH3	E47, I50, A51, L54, R55, I57, G58, D59, F61, N62	Bim-BH3, BINDI	+	-37.4996	0.678787	8
	M-CDP03	3KZ0	Mcl-1•MB7	E47, A50, A51, I54, R55, I57, G58, D59, N61, N62, Y65	MB7 peptide	+	-31.2833	0.660599	11
	M-CDP04	3KZ0	Mcl-1•MB7	E47, A50, A51, I54, R55, I57, G58, D59, N61, N62, Y65; Y49	MB7 peptide; BINDI	+	-31.1976	0.656449	5
	M-CDP05	3PK1	Mcl-1•Bax-BH3	T47, L50, S51, L54, I57, G58, D59, L61, D62, M65	Bax-BH3	+	-30.7442	0.694437	5
	F-CDP01	3I1H	Bfl-1•Bak-BH3	I50, A51, L54, I57, G58, D59, N62	Bak-BH3	+	-28.74	0.671393	5
	B-CDP01	4B4S	Bcl-B•Bim-BH3	I50, A51, L54, I57, G58, D59, N62	Bim-BH3	+	-29.0724	0.700157	5
	*Bcl-w models were generated by threading the aligned Bcl-w sequence onto the crystal structure of the Bcl-2 pro-survival homolog with indicated PDBID
	1XG10 is a synthetic peptide designed for specificity to Bcl-xL, as described in Dutta et al., 2010.

## Sheet: B. CDP sequences
	Sequences of computational designs and optimized variants
	Construct	Sequence
	2-CDP01	ADPKKVLDKAKDQAENVVRKLKQELEELYKEARKLDLTQDMREKIKLRAEAAELQAIGDIFQAILQAKMEAKKLYDAGLVNSQQLDELKRRLEELAKEAEDRAAKLGKEFLQKLEY
	2-CDP02	ADPKKVLDKAKDRAENAVRELKQKLEELYKEARKLDLTQDMRNKLIMKAIAAELRAIGDIFQAILEAKAEAKKLLDAGLVNSQQFDELKRRLEELEEEAAERARKLGDEFRQKLEY
	2-CDP03	ADPKKVLDKAKDQAENRVRELKQKLEELYKEARKLDLTQEMRRELKERALAARLQAVGDIFYAILQAKSEADKLKKAGLVNSQQLDELKRRLEELAEEAQRKARDYGIEFALKLEY
	2-CDP04	ADPKKVLDKAKDQAENRVRELKQKLEELYKEARKLDLTQEMREKLQEQALAAWLNAAGDIIEAISRALQEADKLKKAGLVNSQQLDELKRRLEELAEEAARKAEKYGEEFKKKLEY
	2-CDP05	ADPKKVLDKAKDQAENRVRELKQKLEELYKEARKLDLTQEMRAELNARFAAATLAAAGDIINAISEALAEADKLKKAGLVNSQQLDELKRRLEELAQEAERKAEEYGQEFLLKLEY
	2-CDP06	ADPKKVLDKAKDEAENRVRELKQKLEELYKEARKLDLTQEMRQELVDKARAASLQASGDIFYAILRALAEAEKLKKAGLVNSQQLDELKRRLEELAEEARRKAEKLGDEFRLKLEY
	2-CDP07	ADPKKVLDKAKDDAENRVRELKQKLEELYKEARKLDLTQEERDELKLKAIAASLQASGDIYNAILRALEEARKLKKAGLVNSQQLDELKRRLEELAEEAQRKANKLGDEFRLKLEY
	aBCL2	ADPKKVLDKAKDEAENRVRELKQRLEELYKEARKLDLTQEMRQELVDKARAASLQANGDIFYAILRALAEAEKLKKAGLVNSQQLDELKRRLEELAEEARRKAEKLRDEFRLKLEY
	X-CDP01	ADPKKVLDKAKDQAENRVRELKQKLEELYKEARKLDLTQEMRRELQARYIAAMLAAAGDIMEAIQQAKNEADKLKKAGLVNSQQLDELKRRLEELAKEAARKAEDYGREFQLKLEY
	X-CDP02	ADPKKVLDKAKDQAENRVRELKQKLEELYKEARKLDLTQEMRKELVARYIAAMLAAAGDIVQAIQDAKNEADKLKKAGLVNSQQLDELKRRLEELAKEAARKATDYGREFQLKLEY
	X-CDP03	ADPKKVLDKAKDQAENRVRELKQKLEELYKEARKLDLTQEMRRELRNRAIAAILQAIGDLLNAIQQAKDEADKLKKAGLVNSQQLDELKRRLEELQNEAAEKAADYGEEFWLKLEY
	X-CDP04	ADPKKVLDKAKDQAENRVRELKQKLEELYKEARKLDLTQEDRKRLLLQYIAAMLAAIGDLENAIRWAKREADKLKKAGLVNSQQLDELKRRLEELAKEAAEKAADYGEEFNLKLEY
	X-CDP05	ADPKKVLDKAKDQAENRVRELKQKLEELYKEARKLDLTQEMRRQLRDQYIAAMLAAIGDLLNAIMQAKREADKLKKAGLVNSQQLDELKRRLEELEEEAAQKAADYGQEFLLKLEY
	X-CDP06	ADPKKVLDKAKDRAENRVRELKKKLEKLYKEARKLDLTQEQRNKIINAAMAAMIAAFGDIFHAIQEAKEEAKKLKKAGLVNSQQLDELKRRLDELDEEAAQRAEKLGKEFNLKFEY
	X-CDP07	ADPKKVLDKAKDRAENVVRKLKKELEELYKEARKLDLTQEMRDRIRLAAIAARIAAFGDIFHAIMEALEEARKLKKAGLVNSQQLDELKRRLEELDEEAAQRAEKLGKEFELKLEY
	X-CDP08	ADPKKVLDKAKDRAENRVRKLKKELEKLYKEARKLDLTQEQRDRIINAAIAAMIAAFGDIFHAIMEAKEEARKLKKAGLVNSQQLDELKRRLDELDEEAAQRAEKLGKEFRLKFEY
	X-CDP09	ADPKKVLDKAKDQAENRVRELKQKLEELYKEARKLDLTQEMRKKLIQKALSALLKAIGDILDAIARAKAEADKLKKAGLVNSQQLDELKRRLEELLKEAARKALDYGREFWLKLEY
	X-CDP10	ADPKKVLDKAKDQAENRVRELKQKLEELYKEARKLDLTQEMRRELRERYIAAMLAAAGDLWYAITQAKREADKLKKAGLVNSQQLDELKRRLEELLEEAARKAEDYGEEFRLKLEY
	X-CDP11	ADPKKVLDKAKDQAENRVRELKQKLEELYKEARKLDLTQEMRRELRDRYIAAMLAAIGDLFNAIQWAKQEADKLKKAGLVNSQQLDELKRRLEELAEEAARKAEDYGEEFKLKLEY
	X-ECM01	ADPKKVLDKAKDRAENVVRKLKKELEELYKEARKLDLTQEMRDRIRRAAIAARIQAHGDIFHAIKHALREARKLKKAGLVNSQQLDELKRRLEELDEEAEQRAEKLGKEFELKLEY
	X-ECM02	ADPKKVLDKAKDRAENVVRKLKKELEELYKEARKLDLTQEMRDRIRRTAIAARFQAHGDIFHAIKEAKREARKLKKAGLVNSQQLDELKRRLEELDEEAEQRAEKLGKEFELKLEY
	X-ECM03	ADPKKVLDKAKDRAENVVRKLKKELEELYKEARKLDLTQEMRDRIRRAAIAARFAAHGDIFHAIKEAKEEARKLKKAGLVNSQQLDELKRRLRELDEEAEQRAEKLGKEFRLKLEY
	X-ECM04 (XINDI)	ADPKKVLDKAKDRAENVVRKLKKELEELYKEARKLDLTQEMRDRIRRTAIAARFQAHGDIFHAIKHAKEEARKLKKAGLVNSQQLDELKRRLRELDEEAEQRAEKLGKEFRLKLEY
	W-CDP01	ADPKKVFDKAKDKAENQVRYLKQRLEELYKEARKKDLTQEQRRKLKEKYLAAKLAAILAAIGDAFNALAEARELHKQGKVNKQQLDELAKRLDRLAEEAIQKAEDYAREFAYKLEY
	W-CDP02	ADPKKVLDKARDQALKRLEEMRKKLEESYKEARKKDLTQEERRKLEEKYAEAMKRAAEDIYNMIQQALKEAEKEKKAGQVNSQQLDKLREDLNNKLIAAALAAIGDAFNMAANLRT
	W-CDP03	ADPKKVFDEAKDRAENNVRRLKQKLEELYKEARKKDLTQEEREKLKEKYKTAMAAAALAAIGDAFNALLKARKLHKNGQVNEQQLEELARRLQELAKEAFQKAKDYANEFEYKLEY
	W-CDP04	ADPKKVLDKAKDQAENRVRELKQKLEELYKEARKLDLTQEMRLKLIQKAYVALASAAGDNEAAIIQAKQEADKLKKAGLVNSQQLDELKRRLEELAKEAERKAEDYGREFQLKLEY
	W-CDP05	ADPKKVLDKAKDQAENRVRELKQKLEELYKEARKLDLTDEMRTKLLQKYAAALVSAYGDNWKAIKQAKQEADKLKKAGLVNSQQLDELKRRLEELSKEAERKAEDYGREFRLKLEY
	W-ECM01 (aBCLW)	ADPKKVFDELKDRAENNVRRLKQKLEELYKEARKKDLTQEEREKLKTKYKTAMQLAALAAEGDIMNALLKARKLHKNGQVNEQQLEELARRLMELAKEAFQKAKDYANEFKYKLEY
	M-CDP01	ADPKKVLDKAKDQAENRVRELKQELEELYKKARKLDLTQEERRKLEEEAIAALLRAIGDIYNAIQQALNEADKLKKAGLVNSQQLDELKRRLEELKKEASKKARDYGLEFFEKLDY
	M-CDP02	ADPKKVLDKAKDQAENRVRELKQELEELYKEARKLDLTQEERRKLEESYIAAMLRAIGDIFNAIMQAKNEADKLKKAGLVNSQQLDELRRRLEELRKEASLKAEDYGREFQEKLEY
	M-CDP03	ADPKKVLDKAKDQAENRVRELKQDLERLYKEARKLDLTQEMRRKLQEKAAAAMIRAIGDINNAIYQALQEADKLKKAGLVNSQQLDELKRRLEELQKEASRKAQAYGEEFMLKLEY
	M-CDP04 (aMCL1)	ADPKKVLDKAKDQAENRVRELKQVLEELYKEARKLDLTQEMRKKLIERYAAAIIRAIGDINNAIYQAKQEAEKLKKAGLVNSQQLDELLRRLDELQKEASRKANEYGREFELKLEY
	M-CDP05	ADPKKVLDKAKDQAENRVRELKQKLEELYKEARKLDLTQEERHRLETKALSALLAAIGDILDAIMQALQEAAKLKKAGLVNSQQLDELKRRLEELRKEASRKARDYGREFWLKLDY
	F-CDP01	ADPKKVLDKAKDQAENRVRELKQKLEELYKEARKLDLTQEMRKKLQYAAIGAMLAAIGDILNAIMQAKQEADKLKKAGLVNSQQLDELKRRLEELKEEALRKAHDYGSEFYLKLEY
	F-ECM01	ADPKKVLDKAKDQAENRVRELKQKLEELYKEARKLDLTQEMRKKLEIAALGAVLAAHGDILNAIMQAKEEADKLKKAGLVNSQQLDELKRRLEELKEEALRKASDYGKEFHLKRQY
	F-ECM02	ADPKKVLDKAKDQAENRVRELKQKLEELYKEARKLDLTQEMRKKLEIAALGAVLAAHGDILNAIMQAKEEADKLKKAGLVNSQQLDELKRRLEELKEEALRKASDYGKEFHLKRRY
	F-ECM03	ADPKKVLDKAKDQAENRVRELKQKLEELYKEARKLDLTQEMRKKLEVAALGAVLAAHGDILNAIMQAKEEADKLKKAGLVNSQQLDELKRRLEELKEEALRKASDYGKEFHLKRQY
	F-ECM04	ADPKKVLDKAKDQAENRVRELKQKLEELYKEARKLDLTQEMRKKLEVAALGAVLAAHGDILNAIMQAKEEADKLKKAGLVNSQQLDELKRRLEELKEEALRKASDYGKEFHLKRRY
	F-ECM05	ADPKKVLDKAKDQAENRVRELKQKLEELYKEARKLDLTQEMRKKLQIAALGAMLAAIGDILNAIMQAKEEADKLKKAGLVNSQQLDELKRRLEELKEEALRKASDYGKEFHLKRQY
	F-ECM06	ADPKKVLDKAKDQAENRVRELKQKLEELYKEARKLDLTQEMRKKLQIAALGAMLAAIGDILNAIMQAKEEADKLKKAGLVNSQQLDELKRRLEELKEEALRKASDYGSEFHLKREY
	F-ECM07	ADPKKVLDKAKDQAENRVRELKQKLEELYKEARKLDLTQEMRKKLQIAALGAMLAAIGDILNAIMQAKEEADKLKKAGLVNSQQLDELKRRLEELKEEALRKASDYGSEFHLKLEY
	aBFL1	ADPKKVLDKAKDQAENRVRELKQKLEELYKEARKLDLTQEKRKKLEVATLGAVLAAHGDILNAIMQAKEEADKLKKAGLVNSQQLDELKRRLEELKEEALRKASDYGNEFHLKRRY
	B-CDP01	ADPKKVLDKAKDQAENRVRELKQELERLYKEARKLDLTQEMRRKLEWRYIAAMLKAIGDILNAIAQAENEADKLKKAGLVNSQQLDELRRRLEELAKEAARKAHDYGREFQLKLEY
	B-ECM01	ADPKKILDKAKDQVENRVRELKQELERLYKEARKLDLTQEMRRKLHVRYIAAMLKAIAAILNAIAQAENEADKLKKAGLVNSQQLDELRRRLEELTEEAAQKAHDYGREFQLKLEY
	B-ECM02	ADPKKILDKAKDQVENRVRELKQELERLYKEARKLDLTQEMRRKLHVRYIAAMLKAIASILNAIAQAENEADKLKKAGLVNSQQLDELRRRLEELTEEAAQKAHDYGREFQLKLEY
	B-ECM03	ADPKKILDKAKDQVENRVRELKQELERLYKEARKLDLTQEMRRKLHVRYIAAMLKAIADILNAIAQAENEADKLKKAGLVNSQQLDELRRRLEELTEEAARKAHDYGREFQLKLEY
	B-ECM04	ADPKKILDKAKDQVENRVRELKQELERLYKEARKLDLTQEMRRKLHWRYIAAMLKAIADILNAIAQAENEADKLKKAGLVNSQQLDELRRRLEELTEEAARKAHDYGREFQLKLEY
	aBCLB	ADPKKILDKAKDQVENRVRELKQELERLYKEARKLDLTQEMRRKLHVRYIEAMLKAIAAIMNAIAQAENEADKLKKAGLVNSQQLDELRRRLEELTEEAAQKAHDYGRELQLKLEY

## Sheet: C. Crystal data
	Crystallographic data collection and refinement statistics.
	Crystal	aMCL1·Mcl-1	aBCL2·Bcl-2
	Data Collection
	Beamline	ALS502	Saturn CCD
	Wavelength	1	1.5418
	Space group	P21	P41
	Cell dimensions
	a (Å)	61.92	65
	b (Å)	92.25	65
	c (Å)	162.01	134.31
	b (o)	92.39	90
	Rmerge(%)a,*	9.4 (80.9)	5.0 (52.8)
	I/sI	17.3(1.09)	25.8(1.39)
	CC1/2	0.596	0.508
	Completeness (%)	95.5(61.2)	96.6(69.7)
	Redundency	8.0(3.4)	6.0(2.1)
	B(iso)(Å2)	55.87	39.97
	Refinement
	Resolution (Å)	49.5 – 2.74	32 – 2.1
	Unique reflections	43179	35816
	Rwork (%)c,*	19.3(33.4)	15.9(24.7)
	Rfree (%)c,*	23.1(38.4)	20.8(32.7)
	Protein atomsd	13123	4441
	Solvent molecules	10	150
	Protein B factors (Å2)	92.31	55.26
	Solvent B factors (Å2)	69.64	51.48
	RMSD bond length (Å)	0.019	0.0189
	RMSD bond angle (o)	1.998	1.992
	Twinning operator h, k, l	NAb	0.673
	Twinning operator –h, k, -l	NAb	0.327
	Ramachandran (%)
	Core region	97.19	98.84
	Allowed region	1.6	0.96
	Outliers	1.21	0.19
	* Highest resolution shell values in parenthesis.
	a Rmerge =|Ihi - <Ih>|/Ih, where Ihi is the ith measurement of reflection h, and <Ih>
	b Not applicable.
	c R-factor/R-free = h|Fh(o) - Fh(c)|/h|Fh(o)|, where R-free was calculated with 5% of
	the data excluded from refinement.
	d Includes atoms in alternate conformations.

## Sheet: D. Cross-linking
	Protein cross-linking of the aMCL1·Mcl-1 complex.
	Cross-links above the 25 Å limit for cross-linking reagents are shaded dark gray. Note that in this instance, the sequences for crystallized aMCL1 and the Mcl-1-targeting design model M-CDP04 are identical, as no optimization was required beyond computational design.
	Protein 1 (Residue No.)	Protein 2 (Residue No.)	Distance (Crystal), Å	Distance (Design Model), Å	Cross-linking Experiment
	aMCL1 (73)	aMCL1 (76)	5.2	4.9	DSS, BS3, DSG
	aMCL1 (30)	aMCL1 (34)	7.3	6.6	DSS, BS3, DSG
	aMCL1 (102)	aMCL1 (97)	8.8	8.7	DSS, BS3, DSG
	aMCL1 (102)	aMCL1 (22)	9.2	9.5	DSS, BS3, DSG
	aMCL1 (11)	aMCL1 (5)	9.6	9.5	DSS, BS3, DSG
	Mcl-1 (194)	Mcl-1 (197)	9.7	Not Modeled	BS3
	aMCL1 (11)	aMCL1 (4)	10.3	10.3	DSS, BS3, DSG
	Mcl-1 (234)	aMCL1 (113)	11.8	12.8	DSG
	aMCL1 (11)	aMCL1 (97)	12	11.3	DSS, BS3
	Mcl-1 (244)	aMCL1 (43)	12.6	12	DSS, BS3, DSG
	aMCL1 (68)	aMCL1 (76)	12.8	12.3	DSS, BS3, DSG
	Mcl-1 (244)	aMCL1 (44)	12.9	12.3	DSS, BS3, DSG
	aMCL1 (113)	aMCL1 (34)	13.4	13.4	DSS, BS3, DSG
	aMCL1 (102)	aMCL1 (11)	13.5	12.2	DSS, BS3, DSG
	aMCL1 (5)	aMCL1 (73)	13.6	12.8	DSS, BS3, DSG
	aMCL1 (113)	aMCL1 (22)	13.6	12.5	DSS, BS3, DSG
	Mcl-1 (276)	Mcl-1 (194)	13.9	14.1	DSS, BS3, DSG
	Mcl-1 (238)	aMCL1 (43)	14.1	14.1	BS3
	aMCL1 (34)	aMCL1 (44)	14.2	13.6	DSS, BS3, DSG
	Mcl-1 (194)	Mcl-1 (208)	14.3	14.1	DSS, BS3, DSG
	aMCL1 (30)	aMCL1 (44)	14.7	13.6	DSS, BS3
	aMCL1 (34)	aMCL1 (43)	14.8	14.2	BS3
	aMCL1 (68)	aMCL1 (97)	14.8	14.3	DSS, BS3, DSG
	Mcl-1 (234)	Mcl-1 (244)	15	14.5	DSS
	Mcl-1 (197)	Mcl-1 (208)	15.3	Not Modeled	DSS, BS3, DSG
	Mcl-1 (279)	Mcl-1 (194)	15.3	15.7	DSG
	aMCL1 (9)	aMCL1 (73)	15.3	14.7	BS3
	aMCL1 (102)	aMCL1 (113)	16.5	16.7	DSS, BS3
	aMCL1 (11)	aMCL1 (22)	16.7	16.3	DSS, BS3
	Mcl-1 (238)	aMCL1 (44)	17	16.9	DSS
	aMCL1 (5)	aMCL1 (76)	17.2	16.5	DSS
	Mcl-1 (234)	aMCL1 (22)	18.5	17.8	DSS
	Mcl-1 (208)	aMCL1 (68)	18.6	20.5	DSS, BS3
	Mcl-1 (308)	Mcl-1 (208)	19.1	18.9	DSS, BS3
	Mcl-1 (234)	aMCL1 (34)	19.2	19	DSS, BS3
	Mcl-1 (279)	Mcl-1 (197)	20.8	Not Modeled	DSS, BS3, DSG
	Mcl-1 (308)	aMCL1 (73)	20.8	24	DSS, BS3
	Mcl-1 (208)	aMCL1 (73)	21.1	24.4	DSS, BS3
	Mcl-1 (208)	aMCL1 (76)	22.5	25.1	DSS, BS3, DSG
	Mcl-1 (308)	aMCL1 (76)	24.2	26.5	BS3
	Mcl-1 (308)	aMCL1 (9)	24.7	27.5	DSS, BS3
	Mcl-1 (208)	Mcl-1 (238)	32.8	32.8	DSS
	Mcl-1 (308)	aMCL1 (44)	32.8	31.7	BS3
	Mcl-1 (208)	Mcl-1 (234)	33.9	33.7	DSS
	Mcl-1 (308)	Mcl-1 (234)	35.9	35.1	DSS
	Mcl-1 (208)	aMCL1 (44)	36.8	36.3	BS3
	Mcl-1 (197)	aMCL1 (76)	37.6	Not Modeled	BS3
	Mcl-1 (197)	aMCL1 (44)	39.3	Not Modeled	BS3
	Mcl-1 (308)	aMCL1 (34)	43.9	42.3	BS3, DSG

## Sheet: E. Sort conditions
	Sort conditions for all in vitro evolution experiments.
	Library	Sort	Incubation conditions		Specificity [competitor]/[target]
			Target conc. (nM)	Competitor conc. (nM)
	2-CDP06 SSM	1	0.5	40	80
	2-CDP06 SSM	2	0.25	40	160
	X-CDP07 SSM	1	2	4	2
	X-CDP07 SSM	2	2	4	2
	X-CDP07 combinatorial	1	1	8	8
	X-CDP07 combinatorial	2	0.5	32	64
	X-CDP07 combinatorial	3	0.35	64	183
	X-CDP07 combinatorial	4	0.2	100	500
	X-CDP07 combinatorial	5	0.1	200	2000
	W-CDP03 SSM	1	2	8	4
	W-CDP03 SSM	2	0.5	2	4
	W-CDP03 combinatorial	1	0.5	2	4
	W-CDP03 combinatorial	2	0.15	3	20
	W-CDP03 combinatorial	3	0.05	20	400
	W-CDP03 combinatorial	4	0.05	40	800
	W-CDP03 combinatorial	5	0.05	80	1600
	M-CDP02 SSM (Mcl-1)	1	4	12	3
	M-CDP02 SSM (Bfl-1)	1	20	2	0.1
	M-CDP02 SSM (Bcl-B)	1	20	4	0.2
	M-CDP02 SSM (Bcl-2)	1	8	4	0.5
	M-CDP02 SSM (Bcl-XL)	1	20	2	0.1
	M-CDP02 SSM (Bcl-W)	1	100	2	0.02
	F-CDP01 SSM	1	4	4	1
	F-CDP01 SSM	2	4	4	1
	F-CDP01 combinatorial	1	4	8	2
	F-CDP01 combinatorial	2	2	8	4
	F-CDP01 combinatorial	3	2	16	8
	F-CDP01 combinatorial	4	2	16	8
	F-ECM04 error-prone PCR	1	0.75	40	53
	F-ECM04 error-prone PCR	2	0.5	40	80
	F-ECM04 error-prone PCR	3	0.5	40	80
	F-ECM04 error-prone PCR	4	0.5	40	80
	F-ECM04 error-prone PCR	5	0.5	40	80
	B-CDP01 SSM	1	4	8	2
	B-CDP01 SSM	2	4	8	2
	B-CDP01 combinatorial	1	4	8	2
	B-CDP01 combinatorial	2	2	8	4
	B-CDP01 combinatorial	3	2	16	8
	B-CDP01 combinatorial	4	2	16	8
	B-ECM01 error-prone PCR	1	0.5	40	80
	B-ECM01 error-prone PCR	2	0.2	40	200
	B-ECM01 error-prone PCR	3	0.2	40	200
	B-ECM01 error-prone PCR	4	0.1	40	400
	B-ECM01 error-prone PCR	5	0.1	40	400

## Sheet: F. Mutations
	Mutation summary of evolved variants.
				Combinatorial library		No combinatorial library
	Name of Final Variant	Target	Name of Original Computational Design	SSM mutations included in combinatorial library	Mutations in best clone from combinatorial library	SSM-guided point mutants considered	Point mutants combined for final design	Additional mutations from error prone-PCR library
	αBCL2	Bcl-2	2-CDP06	N/A	N/A	E20N, K24R, V46E, V46R, D47F, D47W, R50D, R50L, R50M, S53D, S53K, S53R, S57H, S57N, L68R, R100F, R100K, R100N, G107M, G107R	K24R, S57N, G107R	N/A
	αBCLXL	Bcl-xL	X-CDP07	E24R, L28K, D43R, L47R, A48E, A48K A48Q, A48T, I54F, A55Q, F57H, M65H, M65K, M65R, E66H, E66K, E66R, L68K, L68N, L68R, E69R, E70R, E93K, E93R, D96T, A100E, A100K, A100Q, E111R	L47R, A48T, I54F, A55Q, F57H, M65K, E66H, L68K, E93R, A100E, E111R	N/A	N/A	N/A
	αBCLW	Bcl-w	W-CDP11	A9L, R19N, R19Q, E46D, E46T, A53E, A53H, A53Q, A54I, A54L, A54M, A54S, A54T, A54V, A59I, A59M, A59T, A59V, I60E, A63F, A63I, A63L, A63M, F64I, F64L, F64M, N76R, E85R, Q92M, Q92T, E93V, E97D, F99E, E110K	A9L, E46T, A53Q, A54L, I60E, A63I, F64M, Q92M, E110K	N/A	N/A	N/A
	αMCL1	Mcl-1	M-CDP04	N/A	N/A	N/A	N/A	N/A
	αBFL1	Bfl-1	F-CDP01	Q46S, Q46E, Y47I, Y47V, I50K, I50L, I50M, M53C, M53I, M53V, L54N, I57F, I57H, I57L, I57N, I57S, I57T, Q69E, H104E, H104R, H104S, H104T, S108K, S108N, Y111H, Y111K, Y111W, L114R, E115G, E115Q, E115R	Q46E, Y47V, I50L, M53V, I57H, Q69E, H104S, S108K, L114R, E115R	N/A	N/A	M41K, A49T, K108N
	αBCLB	Bcl-B	B-CDP01	I6V, A14V, N16K, E20F, L21V, E46H, E46Q, E46Y, W47F, W47I, W47L, W47V, Y49F, I50L, A51E, A51I, A51K, A51R, L54I, G58A, G58S, D59A, D59K, D59N, D59S, D59T, A63L, A63V, E93K, A96T, K97E, R101Q	V6I, A14V, E46H, W47V, G58A, D59A, A96T, K97E, R101Q	N/A	N/A	A51E, L61M, F110L
