# Supplementary figures and images for: Computationally designed high specificity inhibitors delineate the roles of BCL2 family proteins in cancer
Source: eLife journal article supplement (doi:10.7554/elife.20352), 2016-11-02

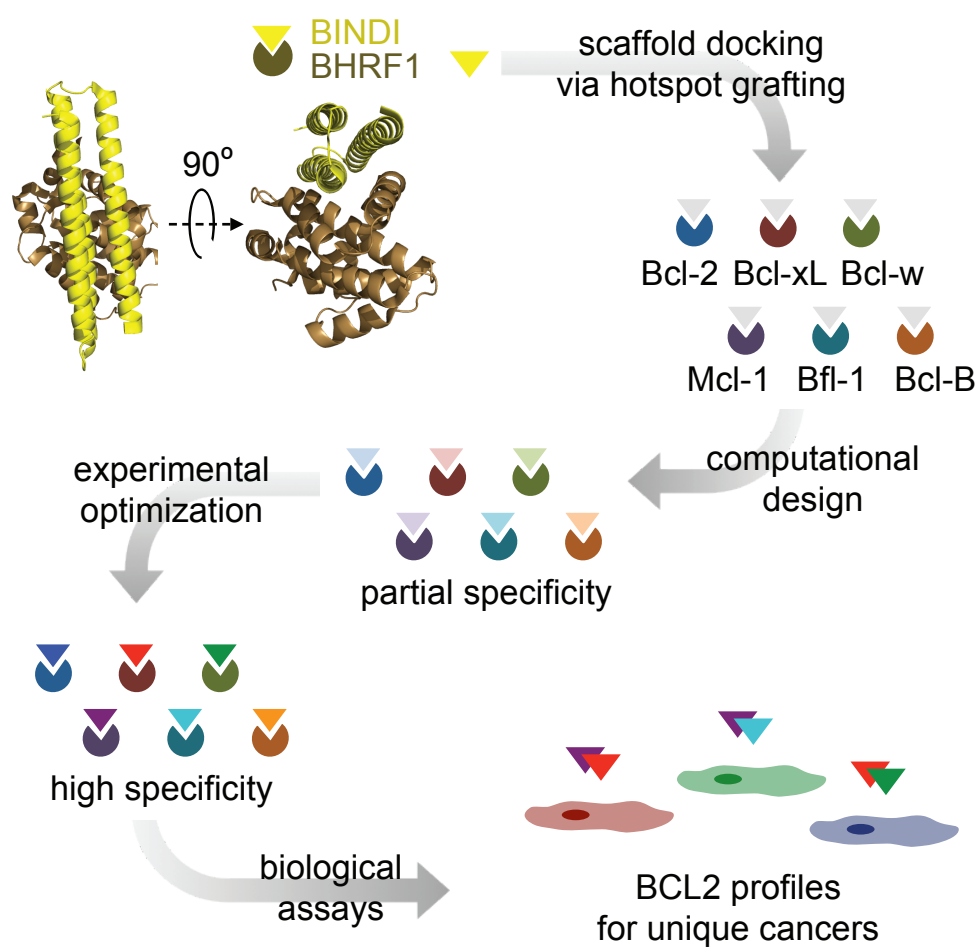

Supplement: supp [file elife_poa_e20352_Figure_1_figure_supplement_1.pdf › elife_poa_e20352_Figure_1_figure_supplement_1.pdf]

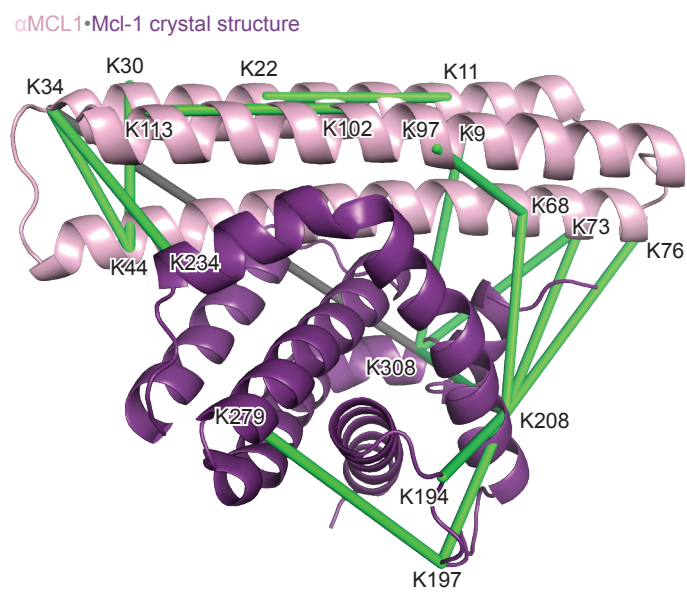

Supplement: supp [file elife_poa_e20352_Figure_3_figure_supplement_1.pdf › elife_poa_e20352_Figure_3_figure_supplement_1.pdf]

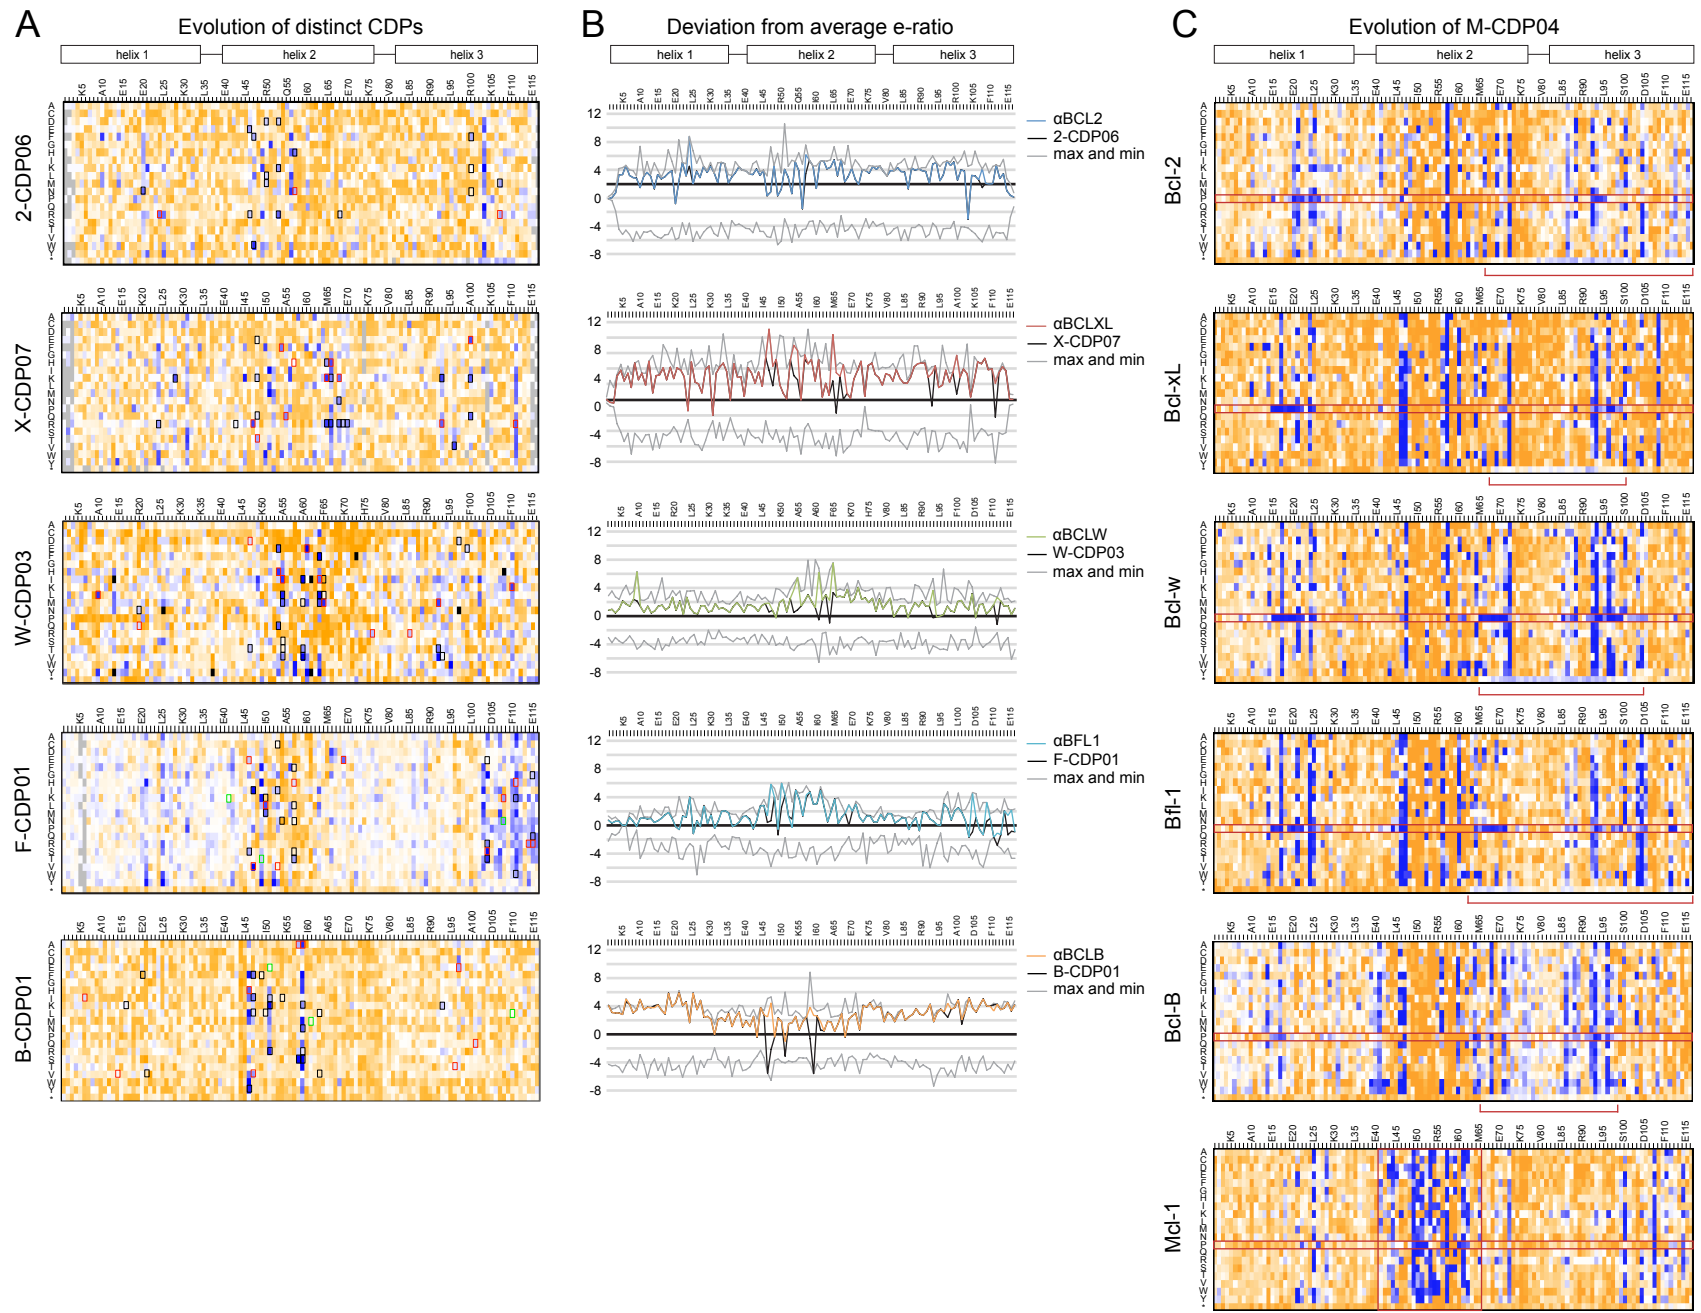

Supplement: supp [file elife_poa_e20352_Figure_5_figure_supplement_1.pdf › elife_poa_e20352_Figure_5_figure_supplement_1.pdf]

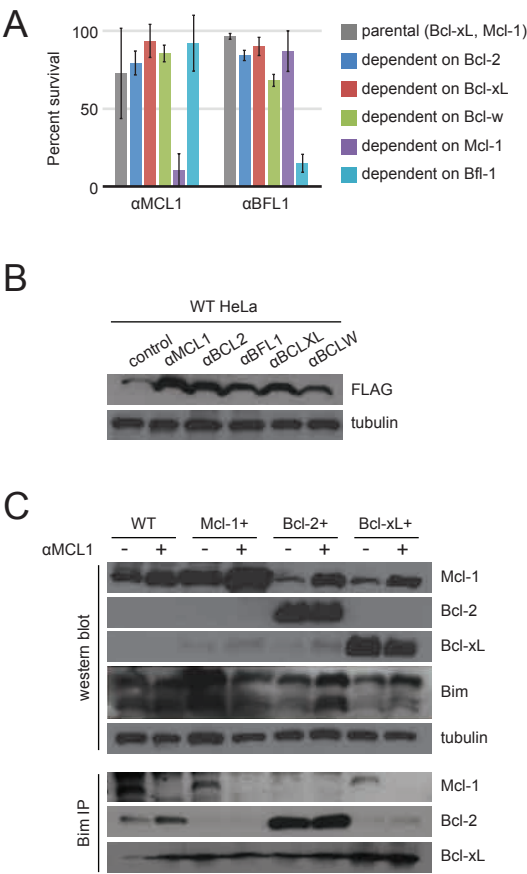

Supplement: supp [file elife_poa_e20352_Figure_7_figure_supplement_1.pdf › elife_poa_e20352_Figure_7_figure_supplement_1.pdf]

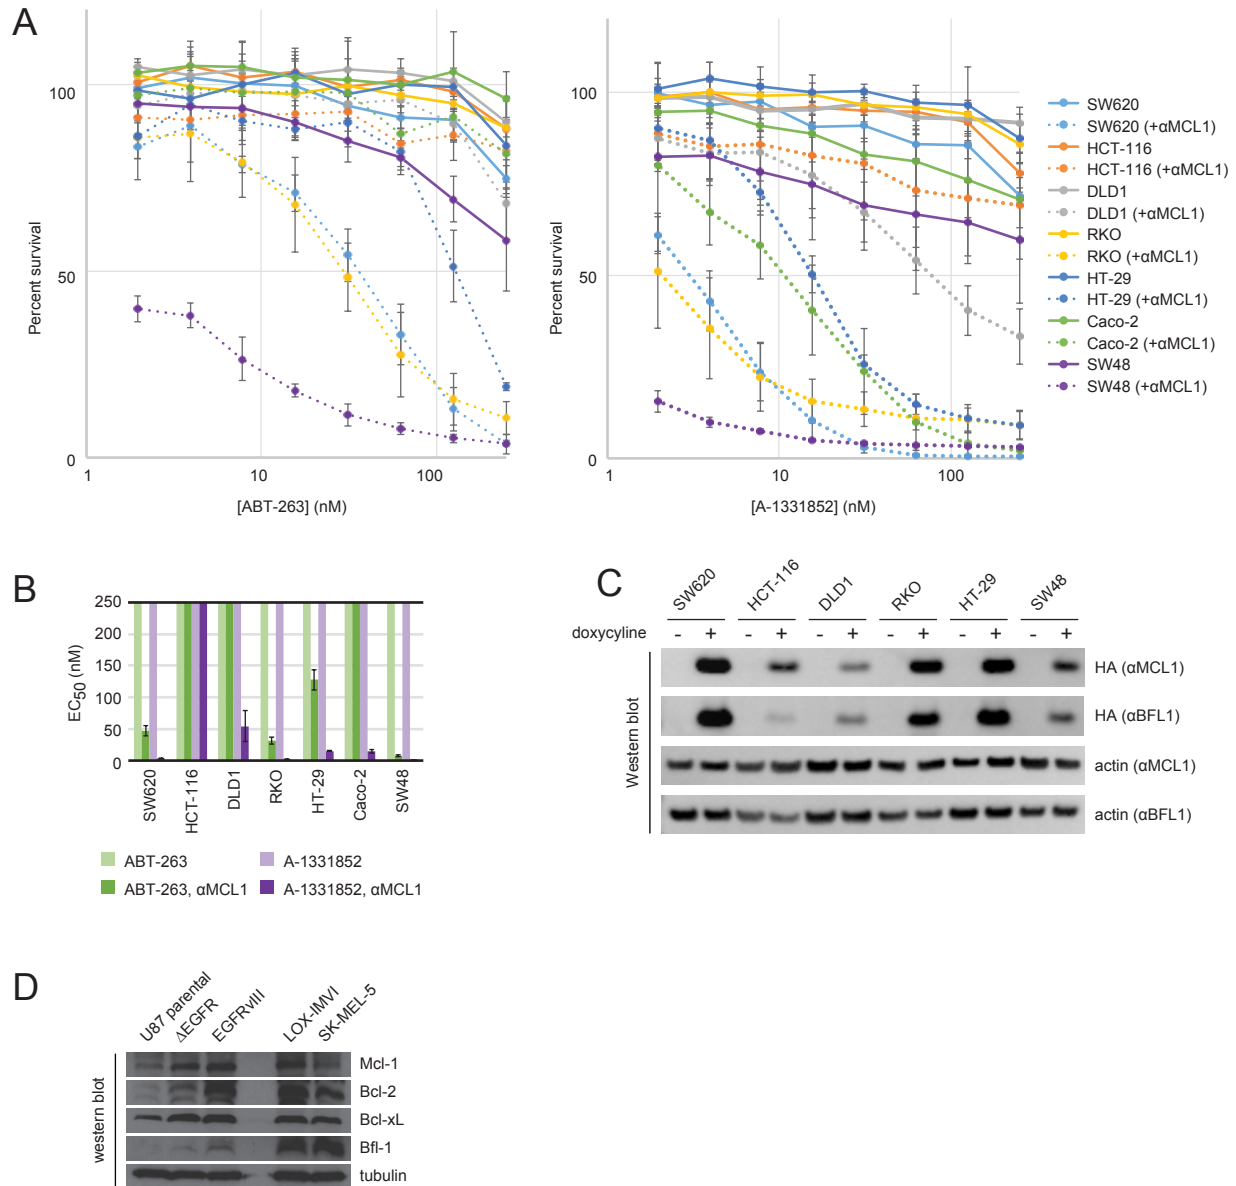

Supplement: supp [file elife_poa_e20352_Figure_9_figure_supplement_1.pdf › elife_poa_e20352_Figure_9_figure_supplement_1.pdf]
